# Supplementary material for: Integrated Analysis of Liver Transcriptome, miRNA, and Proteome of Chinese Indigenous Breed Ningxiang Pig in Three Developmental Stages Uncovers Significant miRNA–mRNA–Protein Networks in Lipid Metabolism
Source: Front Genet. 2021 Sep 16;12:709521. doi: 10.3389/fgene.2021.709521 (PMC8481880; doi:10.3389/fgene.2021.709521)
Supplement: Supplementary File 1 — List of expressed genes and miRNA during Ningxiang pig liver development. Gene ID, TPM value, gene name, GO/KO ID, position, and description of all acquired genes. [file Table_1.XLS]

## Sheet: Details of all miRNAs
miRNA name	N210D_L1	N210D_L2	N210D_L3	N90D_L1	N90D_L2	N90D_L3	N30D_L1	N30D_L2	N30D_L3	N210D_L	N90D_L	N30D_L
ssc-miR-143-3p	48429.1	75493.4	84370.7	99895.9	96807.5	90626.8	201305	182396	185143	69431	95776.7	189615
Chr07_18810	438024	453230	367025	236400	268921	187297	124429	166304	180413	419427	230873	157049
Chr07_18928	2821.47	1882.72	7966.92	1115.09	2231.83	740.67	115900	85761.7	116324	4223.7	1362.53	105995
Chr03_8336	137827	140607	167427	118120	106986	90331.1	112207	95844.4	83246.4	148620	105146	97099.2
Chr03_8335	137827	140607	167427	118120	106986	90331.1	112207	95844.4	83246.4	148620	105146	97099.2
Chr07_18933	1855.22	1790.88	4135.5	1460.24	1497.3	1265.31	103945	92997.5	70986.1	2593.87	1407.62	89309.4
ssc-miR-21-5p	41798.1	35602.8	53204.2	60304.2	54187.2	65273.2	72886.2	87809.5	77953.1	43535	59921.5	79549.6
Chr07_18920	1082.21	1193.92	2736.73	1247.84	536.77	401.2	61148.3	51915.7	77222.7	1670.95	728.603	63428.9
ssc-miR-148a-3p	46442.5	69925.2	46992.8	65270.2	71624.2	74232.4	45352.1	56486.8	63726.2	54453.5	70375.6	55188.4
Chr06_16826	67135.6	18230.2	14778.3	77658.3	61954.4	81165.3	50373.1	65675.5	38079.2	33381.4	73592.7	51376
Chr07_18848	1893.87	642.88	4257.13	1407.14	1356.05	1450.48	51363.1	48633.9	53298.1	2264.63	1404.56	51098.4
ssc-miR-26a	58588.3	78811.5	59267.1	51903.8	52641.7	55517.3	48926.1	47848	56360.6	65555.6	53354.2	51044.9
ssc-miR-126-3p	15252.6	22121.3	17848.2	25381.4	24788.7	27921	43012	36406.7	42258.7	18407.4	26030.4	40559.1
Scaffold180_43140	36022.1	15750.6	20373.4	85278.1	77266.4	90176.8	32706.4	35981.2	48360	24048.7	84240.5	39015.8
Scaffold180_43139	36022.1	15750.6	20373.4	85278.1	77266.4	90176.8	32706.4	35981.2	48360	24048.7	84240.5	39015.8
ssc-miR-30a-5p	50760.4	65509.3	58622.6	57748	59104.2	49093.5	33455	42348.6	37944.1	58297.4	55315.3	37915.9
ssc-let-7i-5p	4300.24	4653.12	5625.06	7116.71	6091.78	7070.27	38651.8	32845.6	33404.4	4859.47	6759.59	34967.3
Chr07_18882	502.45	551.04	1824.48	477.9	508.52	277.75	32554.1	31987.7	38973.2	959.323	421.39	34505
ssc-miR-199a-3p	8597.16	8173.34	8733.01	7080.57	7521.57	7440.69	36892.4	39016.3	26076.9	8501.17	7347.61	33995.2
ssc-miR-199b-3p	8578.25	8155.62	8717.45	7068.86	7510.18	7430.35	36847.7	38971.8	26046.5	8483.77	7336.46	33955.3
Chr07_18904	463.8	183.68	1946.12	371.7	508.52	401.2	35790.4	30287.5	30437.8	864.533	427.14	32171.9
ssc-let-7a	19771.5	20575.9	22777.2	17856.3	19360.2	17873.9	34359.6	28547.5	31919.1	21041.5	18363.5	31608.7
ssc-miR-99a-5p	8533.34	8374.83	9471.82	9041.34	9900.61	10231	26836.4	29334	25787.6	8793.33	9724.33	27319.3
Chr07_18910	850.31	642.88	2615.09	345.15	508.52	123.45	31640.3	27005.7	20710.5	1369.43	325.707	26452.1
ssc-miR-199a-5p	3193.11	3819.37	4952.73	5920.43	5603.05	6651.39	25316.6	27836.7	19797.1	3988.4	6058.29	24316.8
Chr07_18858	502.45	91.84	1337.96	106.2	367.26	246.89	21360	24593.7	23264.7	644.083	240.117	23072.8
ssc-let-7g	19474.3	20706.8	25588.1	21762	20449.8	21202.9	23168	19123.9	26617.8	21923.1	21138.3	22969.9
ssc-let-7f-5p	19115.5	20930	21312.1	19428.9	18381.1	17943.8	20157.4	16698.8	19744.8	20452.6	18584.6	18867
ssc-miR-24-3p	3723.99	4336.34	4495.81	8046.42	7581.81	8763.41	21603.6	20317.6	14138.9	4185.38	8130.55	18686.7
ssc-miR-27b-3p	9004.56	9735.97	9683.73	16346	17793.2	17653.5	16298	18536.2	19117.8	9474.75	17264.3	17984
ssc-miR-125b	5909.37	5330.37	4943.61	5143.68	5811.97	5863.16	17793.4	19174.1	15429.9	5394.45	5606.27	17465.8
ssc-miR-30e-5p	12570.2	21531.7	13368.4	22926.7	19278	19602	15469.5	19537	14031	15823.4	20602.2	16345.8
ssc-miR-10b	161.75	510.52	267.87	461.1	307.9	278.74	13687.5	13874	18742.8	313.38	349.247	15434.8
Chr07_18912	811.66	413.28	1094.69	106.2	141.25	92.58	17857.1	12178.2	14154.7	773.21	113.343	14730
ssc-miR-30d	9982.57	12772.9	11029.9	13454.1	12752.2	12794.2	12411.3	13499.6	15643.5	11261.8	13000.2	13851.5
Chr05_12996	115.95	91.84	0	0	0	61.72	8490.71	13364.4	12941.4	69.2633	20.5733	11598.9
ssc-miR-23a	2154.44	2093.28	2337.73	2300.07	2514	2438.3	11037.8	11645.5	11334.2	2195.15	2417.46	11339.2
Chr07_18872	115.95	91.84	790.61	79.65	56.5	92.58	14316.2	9568.62	9301.63	332.8	76.2433	11062.1
ssc-miR-27a	1981.65	1766.27	2197.63	3441.65	3283.81	4503.25	10227.6	10831.9	11185.5	1981.85	3742.9	10748.4
ssc-miR-103	3677.3	3193.13	3982.94	3056.59	3058.82	2619.19	10408.3	11612.9	9768.33	3617.79	2911.53	10596.5
Chr14_32256	16696.9	4270.56	3162.44	21664.7	15735.8	27250.6	10622.9	12573.6	6066.28	8043.31	21550.3	9754.28
ssc-let-7c	2878.17	3222.81	4270.58	2701.26	3183.45	2901.48	10812.8	8392.23	8973.31	3457.19	2928.73	9392.79
ssc-miR-22-3p	12840	16079.5	9071.42	26974.7	23759.3	34064.1	9287.09	10166.8	8077.74	12663.6	28266	9177.22
ssc-miR-145-5p	1558.59	1737.1	2636.03	7893.24	5600.17	7802.01	9388.45	6575.27	10858.3	1977.24	7098.47	8940.68
Chr07_18864	77.3	45.92	182.45	345.15	254.26	123.45	9176.06	11585.1	5832.14	101.89	240.953	8864.45
ssc-miR-16	5592.42	6497.93	5823.65	9712.87	8206.66	9539.29	10258.8	8846.81	7029.69	5971.33	9152.94	8711.76
Chr07_18898	193.25	91.84	121.63	53.1	452.02	123.45	6663.11	11427	7918.09	135.573	209.523	8669.4
ssc-miR-101	77776.3	52165.5	42772.3	59180.3	53801	49318.6	6642.25	8959.98	10103.3	57571.3	54099.9	8568.51
ssc-miR-181a	2827.54	3610.65	3421.4	4665.67	4722.55	5141.92	8683.53	9027.41	7495.5	3286.53	4843.38	8402.15
Chr07_17502	4599.39	5464.48	9852.22	4513.47	6497.73	6233.99	3045.99	12692.3	8237.37	6638.7	5748.4	7991.87
ssc-miR-125a	1640.31	1755.08	1625.43	1680.04	1874.35	1777.87	7449.71	7331.31	8734.79	1673.61	1777.42	7838.6
Chr07_18906	309.2	229.6	668.98	53.1	169.51	92.58	7043.86	6682.22	9216.49	402.593	105.063	7647.52
Chr07_18886	270.55	229.6	121.63	79.65	452.02	30.86	6815.41	6642.68	8854.64	207.26	187.51	7437.58
ssc-miR-26b-5p	14036.3	18318.5	14334.6	11569.7	11684.1	10786.5	7568.87	6702.28	7896.84	15563.2	11346.8	7389.33
ssc-miR-199b-5p	468.98	475.68	458.32	441.64	450.52	482.63	6981.18	7550.15	6686.57	467.66	458.263	7072.63
ssc-miR-92a	3522.1	4030.58	5713.83	8334.99	7324.88	8488.06	6210.86	6236.6	8594.22	4422.17	8049.31	7013.89
Chr07_18870	77.3	229.6	425.71	159.3	84.75	0	5597.01	6405.44	7641.39	244.203	81.35	6547.95
ssc-miR-30c-5p	4355.26	5593.46	5146.13	4541.34	4691.26	4119.71	6706.67	6037.05	6652.49	5031.62	4450.77	6465.4
Chr07_18879	115.95	321.44	304.08	159.3	254.26	92.58	4949.74	7631.17	5278.73	247.157	168.713	5953.21
ssc-miR-152	1898.38	2790.49	2378.82	3024.09	3877.8	2921.08	5417.92	6206.9	5459.8	2355.9	3274.32	5694.87
Chr10_25694	3594.48	3719.52	57532.1	25939.2	72944	27682.6	5178.19	7907.95	3682.34	21615.4	42188.6	5589.49
Chr07_18852	193.25	45.92	243.26	53.1	28.25	61.72	5406.64	5377.41	4406.04	160.81	47.69	5063.36
ssc-miR-374a-5p	2641.4	5624.6	2073.09	5999.34	4763.42	5891.25	4420.3	4653.68	5681.43	3446.36	5551.34	4918.47
Chr14_32455	1700.61	4040.96	1581.22	2575.34	2062.32	1789.96	4188.24	5298.33	5257.44	2440.93	2142.54	4914.67
Chr10_25226	7343.56	4821.6	6811.41	5442.72	5734.95	5061.26	7043.86	4823.85	2830.93	6325.52	5412.98	4899.55
ssc-miR-381-3p	28.09	36.56	109.81	67.75	86.95	66.68	5124.26	4901.03	4572.58	58.1533	73.7933	4865.96
Chr12_27940	12058.9	43027.1	9304.87	9372.1	7091	14165.4	3997.87	4191.21	5683.15	21463.6	10209.5	4624.08
Chr12_27938	12058.9	43027.1	9304.87	9372.1	7091	14165.4	3997.87	4191.21	5683.15	21463.6	10209.5	4624.08
Chr12_27936	12058.9	43027.1	9304.87	9372.1	7091	14165.4	3997.87	4191.21	5683.15	21463.6	10209.5	4624.08
ssc-miR-100	2438.59	2791.1	2825.36	1840.96	2052.94	1615.66	4145.61	4648.22	5007.8	2685.02	1836.52	4600.54
ssc-miR-151-5p	3767.44	3195.88	2974.58	3085.77	3261.57	3208.16	4738.72	4986.21	4057.1	3312.63	3185.17	4594.01
Chr07_18855	231.9	183.68	304.08	132.75	282.51	123.45	3122.14	3914.44	6279.13	239.887	179.57	4438.57
ssc-miR-191	4096.66	3616.59	3713.39	2977.23	3556.81	2893.61	4364.59	4478.03	3617.81	3808.88	3142.55	4153.48
ssc-miR-378	206.21	283.82	299.98	345.16	493.41	372.43	3755.03	3847.97	4668.05	263.337	403.667	4090.35
ssc-miR-186-5p	1662.54	1926.89	1624.17	3758.62	2745.17	3422.23	3785.79	3859.06	4607.15	1737.87	3308.67	4084
ChrX_41300	386.5	1423.52	973.06	849.6	254.26	894.98	3693.27	5337.87	2575.51	927.693	666.28	3868.88
Chr11_26361	3787.73	4224.64	2311.01	1566.44	2118.82	1666.51	4340.54	3637.66	3320.49	3441.13	1783.92	3766.23
ssc-miR-126-5p	1802.92	4279.73	3387.18	2173.41	2076.89	2556.84	3556.94	3524.14	3848.19	3156.61	2269.05	3643.09
ssc-miR-23b	2044.08	2452.55	2174.91	2921.31	3397.06	3098.42	3599.69	3971.04	3192.93	2223.85	3138.93	3587.89
ssc-miR-148b-3p	734.22	1281.3	1141.87	1587.87	1807.83	1605.32	3034.44	3281.06	3981.01	1052.46	1667.01	3432.17
ssc-let-7e	465.05	402.21	581.17	612.29	635.18	647.47	3569.52	2735.67	3915.14	482.81	631.647	3406.78
ssc-miR-542-3p	468.21	613.5	440.23	801.17	869.54	697.47	3011.22	3990.5	3040.64	507.313	789.393	3347.45
ssc-miR-423-3p	748.27	682.76	1058.42	1862.73	1448.1	1498.97	3509.16	2871.72	3361.51	829.817	1603.27	3247.46
Chr13_31632	1855.22	1056.16	304.08	2070.89	762.78	1450.48	3045.99	3756.28	2107.23	1071.82	1428.05	2969.83
ChrX_41449	0	0	0	0	0	0	2855.62	3163.18	2830.93	0	0	2949.91
Chr04_10051	8155.22	1882.72	2736.73	14336.9	14182	16263.9	2969.84	3123.64	2681.94	4258.22	14927.6	2925.14
Chr03_9476	1314.11	1285.76	2067.75	4380.72	2514.34	3425.61	2512.95	2846.86	3214.07	1555.87	3440.22	2857.96
ssc-miR-99b	251.2	258.96	428.59	389.15	357.18	361.32	2637.48	2397	3139.58	312.917	369.217	2724.69
Chr03_9107	309.2	183.68	60.82	26.55	141.25	0	2969.84	2056.07	3001.21	184.567	55.9333	2675.71
Chr07_18918	0	45.92	121.63	53.1	28.25	0	2512.95	2016.53	3235.35	55.85	27.1167	2588.28
ssc-miR-10a-5p	2145.33	2506.07	2079.82	1743.7	1773.99	1486.16	3055.52	2052.35	2606.82	2243.74	1667.95	2571.56
ssc-miR-450b-5p	353.68	379.41	361.97	497.35	519.49	439.57	2431.65	2469.72	2787.32	365.02	485.47	2562.9
Chr07_17443	1816.57	872.48	1946.12	1247.84	960.53	709.81	2246.42	2332.85	3065.07	1545.06	972.727	2548.11
Chr12_28849	4599.39	4546.08	10946.9	5761.32	5734.95	5030.4	2474.87	2491	2660.65	6697.46	5508.89	2542.17
ssc-miR-450c-5p	364.8	341.9	453.69	405.39	530.45	432.31	2691.06	2783.64	2145.57	386.797	456.05	2540.09
Chr07_18960	0	0	60.82	0	28.25	0	3807.49	1976.99	1766.67	20.2733	9.41667	2517.05
Chr07_18959	0	0	60.82	0	28.25	0	3807.49	1976.99	1766.67	20.2733	9.41667	2517.05
Chr07_18867	154.6	0	60.82	0	0	30.86	2360.65	2174.69	2958.64	71.8067	10.2867	2497.99
ssc-miR-151-3p	721.88	913.5	1034.72	1760.61	1397.44	1789.45	2432.23	2241.15	2737.85	890.033	1649.17	2470.41
ssc-miR-30b-5p	2417.45	3035.95	2183.32	2376.22	2643	2781.4	2762.25	2414.07	2126.2	2545.57	2600.21	2434.17
Chr06_17168	1932.52	2204.16	608.16	1460.24	1073.54	1327.04	2056.05	2372.39	2554.22	1581.61	1286.94	2327.55
Chr03_9479	3517.18	2387.84	2067.75	3557.68	3616.13	2962.69	1789.52	2807.32	2043.38	2657.59	3378.83	2213.41
Chr01_2156	1430.06	826.56	1398.77	1938.14	1836.31	2067.71	3426.74	2135.15	1021.69	1218.46	1947.39	2194.53
ssc-let-7d-5p	808.31	844.16	911.59	987.62	929.14	825.58	2165.08	1823.1	2088.35	854.687	914.113	2025.51
ssc-miR-140-3p	1821.67	2755.48	2383.03	2008.29	1867.43	1907.05	1798.69	1949.59	2137.13	2320.06	1927.59	1961.8
Chr10_25175	8889.58	4408.32	7358.75	8920.75	7853.77	7159.83	1637.22	2728.24	1511.25	6885.55	7978.12	1958.9
Chr15_37552	811.66	918.4	1642.04	1035.44	310.76	462.92	3502.89	1779.29	361.85	1124.03	603.04	1881.34
ssc-miR-424-5p	142.69	189.19	277.68	574.38	482.66	611.35	2126	2027.09	1373.89	203.187	556.13	1842.33
ssc-miR-339-5p	1066.3	1267.27	918.6	1032.05	1173.93	1100.31	1785.53	1753.11	1909.24	1084.06	1102.1	1815.96
ssc-miR-339	1066.3	1267.27	918.6	1032.05	1173.93	1100.31	1785.53	1753.11	1909.24	1084.06	1102.1	1815.96
ssc-miR-365-3p	492.6	611.96	796.59	1188.66	899.02	1182.73	1796.95	1245.44	2246.01	633.717	1090.14	1762.8
ssc-miR-98	885.02	1007.54	838.24	1015.58	922.65	888.24	1748.78	1340.18	1769.07	910.267	942.157	1619.34
ssc-miR-451	3779.78	5745.74	5728.84	4179.82	2832.87	4531.18	1470.4	1667.08	1675.19	5084.79	3847.96	1604.22
ChrX_41001	618.41	1102.08	912.24	1035.44	791.03	524.64	1941.82	1423.43	1426.11	877.577	783.703	1597.12
Chr07_18926	0	0	0	132.75	0	30.86	1066.1	1660.67	2000.81	0	54.5367	1575.86
ssc-miR-425-5p	1045.77	776.97	1139.63	1423.63	1272.49	1253.72	1662.5	1305.7	1471.64	987.457	1316.61	1479.95
ssc-miR-450a	288.09	208.63	333.22	279.62	351.65	308.22	1495.36	1593.85	1347.47	276.647	313.163	1478.89
ssc-miR-15b	637.06	535.47	736.7	955.68	917.22	957.39	1528.24	1397.2	1320.15	636.41	943.43	1415.2
ssc-miR-181b	431.71	475.51	566.87	615.94	577.17	594.53	1312.16	1349.57	1194.68	491.363	595.88	1285.47
Chr07_18874	0	0	0	0	0	0	1256.47	1383.89	1213.26	0	0	1284.54
ssc-miR-1468	14.28	15.57	19.91	35.37	29.16	48.93	1149.67	906.77	1674.7	16.5867	37.82	1243.71
ssc-miR-214-3p	242.86	245.88	291.71	160.48	158.58	161.29	1478.92	1503.03	745.06	260.15	160.117	1242.34
ssc-miR-320	354.92	380.1	527.88	339.19	306.41	250.81	1453.96	1329.94	942.55	420.967	298.803	1242.15
Chr08_21328	850.31	459.2	182.45	3531.13	2514.34	4197.14	1028.02	751.26	1575.1	497.32	3414.2	1118.13
Chr08_21327	850.31	459.2	182.45	3531.13	2514.34	4197.14	1028.02	751.26	1575.1	497.32	3414.2	1118.13
Chr03_7531	2319.02	2479.68	6750.59	2495.69	2005.82	2376.32	989.95	1304.81	1042.97	3849.76	2292.61	1112.58
Chr04_10939	2860.12	734.72	60.82	1433.69	1469.05	1604.79	837.65	1581.59	915.26	1218.55	1502.51	1111.5
Chr13_28978	734.36	1193.92	1459.59	1168.19	1130.04	1141.87	1028.02	1107.11	1149.4	1129.29	1146.7	1094.84
ssc-miR-139-5p	797.97	816.8	697.15	459.88	544.29	529.55	1128.77	1070.3	1063.35	770.64	511.24	1087.47
ssc-miR-34a	62.05	38.63	93.68	46.86	63.43	47.69	1006.13	1040.43	924.67	64.7867	52.66	990.41
Scaffold155_42881	270.55	321.44	304.08	106.2	56.5	216.03	1180.32	869.87	830.12	298.69	126.243	960.103
Scaffold155_42879	270.55	321.44	304.08	106.2	56.5	216.03	1180.32	869.87	830.12	298.69	126.243	960.103
Chr13_30396	734.36	596.96	668.98	265.5	508.52	555.5	913.8	1028.03	872.69	666.767	443.173	938.173
Chr06_14906	386.5	91.84	182.45	504.45	113	308.61	1180.32	830.33	659.84	220.263	308.687	890.163
Chr05_11973	541.1	1148	790.61	1460.24	1045.29	493.78	1104.17	869.87	659.84	826.57	999.77	877.96
ssc-miR-127	6.56	4.82	20.62	7.29	9.37	11.11	1061.45	768.5	803.87	10.6667	9.25667	877.94
ssc-miR-574-3p	113.6	113.22	122.85	180.92	158.9	206.97	974.21	914.28	745.16	116.557	182.263	877.883
Chr09_23180	657.06	137.76	60.82	1805.39	678.02	1913.4	1332.62	751.26	532.13	285.213	1465.6	872.003
Chr16_38054	115.95	183.68	304.08	132.75	169.51	308.61	1066.1	869.87	638.56	201.237	203.623	858.177
Chr16_38053	115.95	183.68	304.08	132.75	169.51	308.61	1066.1	869.87	638.56	201.237	203.623	858.177
ssc-miR-1285	425.38	263.69	1038.09	1553.16	903.28	1358.68	986.98	947.06	637.08	575.72	1271.71	857.04
Chr18_40609	502.45	872.48	729.79	477.9	508.52	339.47	837.65	869.87	830.12	701.573	441.963	845.88
ssc-miR-29a-3p	12901	12237.9	14824.2	15093.5	14726.4	16028.1	701.83	825.17	974.64	13321.1	15282.7	833.88
Chr07_18860	0	0	0	0	0	0	951.87	632.64	830.12	0	0	804.877
ssc-miR-3613	253.59	387.06	331.82	1280.06	885.93	1020.36	736.46	362.23	1311.21	324.157	1062.12	803.3
ssc-miR-28-5p	626.72	634.75	662.93	691.98	772.58	717.69	800.1	673.93	774.56	641.467	727.417	749.53
Chr02_3842	193.25	0	121.63	929.24	762.78	740.67	1256.47	514.02	446.99	104.96	810.897	739.16
ssc-miR-145-3p	368.5	457.61	489.03	450.15	385.28	387.25	766.83	594.04	855.63	438.38	407.56	738.833
ssc-miR-28-3p	277.67	438.34	391.56	504.86	438.6	454.08	710.54	632.96	856.22	369.19	465.847	733.24
ssc-miR-30e-3p	213.38	328.3	540.36	803.49	620.28	881.45	633.16	600.36	937.98	360.68	768.407	723.833
ssc-miR-15a	372.13	496.67	312.74	914.68	727.56	887.16	778.82	889.19	491.54	393.847	843.133	719.85
ssc-miR-363	57.03	51.36	57.36	121.24	93.55	104.64	703.57	637.23	770.19	55.25	106.477	703.663
ssc-miR-193a-5p	59.89	46.72	49.23	57.25	51.41	58.8	752.52	603.6	724.79	51.9467	55.82	693.637
Chr08_21021	0	0	0	0	0	0	342.67	1225.73	510.84	0	0	693.08
Chr06_16424	70304.9	99967.9	90068.7	45214.4	59863.8	37928.6	190.37	1739.75	106.43	86780.5	47668.9	678.85
Chr06_16423	70304.9	99967.9	90068.7	45214.4	59863.8	37928.6	190.37	1739.75	106.43	86780.5	47668.9	678.85
ssc-miR-455-3p	142	146.69	145.29	208.33	153.26	190.15	718.47	710.97	597.14	144.66	183.913	675.527
Chr15_35972	0	45.92	0	0	0	0	685.35	514.02	808.84	15.3067	0	669.403
Chr08_21025	0	0	0	0	0	0	533.05	1028.03	446.99	0	0	669.357
Chr16_38644	0	0	2128.57	1699.19	56.5	0	533.05	553.56	872.69	709.523	585.23	653.1
ssc-miR-30a-3p	416.89	655.92	703.47	810.23	872.84	881.3	570.29	546.76	760.95	592.093	854.79	626
ssc-miR-7-5p	290.71	462.95	457.2	622.79	451.48	503.31	698.74	552.56	617.51	403.62	525.86	622.937
ssc-miR-195	375.22	577.46	378.8	371.35	385.07	446.05	630.64	762.53	432.43	443.827	400.823	608.533
Chr05_12210	541.1	413.28	304.08	106.2	282.51	154.31	723.42	355.86	702.41	419.487	181.007	593.897
ssc-miR-1	348.75	656	708.37	405.28	392.2	192.62	476.08	333.21	940.56	571.04	330.033	583.283
Chr04_11639	309.2	275.52	0	1194.74	1101.79	1913.4	837.65	276.78	617.27	194.907	1403.31	577.233
Chr08_21027	0	0	0	0	0	0	418.82	948.95	319.28	0	0	562.35
ssc-let-7i-3p	18.37	26.07	27.35	113.51	104.09	164.07	645.54	583.8	429.85	23.93	127.223	553.063
ChrX_41159	347.85	137.76	304.08	637.2	819.28	802.39	609.2	830.33	212.85	263.23	752.957	550.793
ssc-miR-423-5p	335.78	240.81	341.78	467.4	417.63	401.44	608.2	537.71	490.65	306.123	428.823	545.52
ssc-miR-142-5p	857.39	1199.74	877.23	2348.59	1857.11	2715.19	487.88	574.07	539.82	978.12	2306.96	533.923
ssc-miR-499-5p	374.29	464.58	287.64	528.96	559.51	582.64	395.99	575.61	627.24	375.503	557.037	532.947
ssc-miR-532-5p	87.21	96.62	104.34	120.25	112.71	105.88	457.89	537.71	563.86	96.0567	112.947	519.82
ssc-miR-361-5p	332.38	413.73	319.2	384.39	353.24	381.53	576.09	517.4	460.45	355.103	373.053	517.98
ChrX_42170	115.95	505.12	121.63	0	0	0	418.82	434.94	681.13	247.567	0	511.63
Chr12_28838	463.8	91.84	486.53	185.85	56.5	524.64	304.6	316.32	893.98	347.39	255.663	504.967
Chr12_28834	463.8	91.84	486.53	185.85	56.5	524.64	304.6	316.32	893.98	347.39	255.663	504.967
ssc-miR-335	322.66	643.36	180.92	328.69	488.84	450.06	484.98	628.52	398.56	382.313	422.53	504.02
ssc-miR-136-3p	5.09	4.04	11.78	7.74	13.52	7.41	508.58	518.42	480.41	6.97	9.55667	502.47
ssc-miR-369	7.25	4.9	16.41	8.95	10.86	9.26	549.39	373.67	581.25	9.52	9.69	501.437
Chr08_22075	1700.61	2525.6	1459.59	1539.89	932.28	1296.18	913.8	355.86	234.14	1895.27	1256.12	501.267
ssc-miR-676-3p	97.24	101.18	104.06	90.41	85.57	97.08	396.96	431.53	674.73	100.827	91.02	501.073
ssc-miR-140-5p	186.06	483.59	319.06	641.25	463.83	672.47	508.96	535.15	452.5	329.57	592.517	498.87
Chr07_19592	579.75	596.96	1277.14	531	819.28	1111.01	609.2	474.48	404.42	817.95	820.43	496.033
ssc-miR-374a-3p	440.66	559.39	558.17	608.09	609.53	585.88	427.72	430.51	612.14	519.407	601.167	490.123
ssc-miR-128	167.31	130.68	160.3	175.18	169.33	167.31	426.17	475.58	563.66	152.763	170.607	488.47
ssc-miR-107	620.09	449.78	587.62	481.21	473.19	418.73	531.4	538.57	385.25	552.497	457.71	485.073
Chr01_2570	154.6	0	0	663.75	508.52	648.09	342.67	948.95	106.43	51.5333	606.787	466.017
ssc-miR-218b	200.88	285.8	483.7	281.72	268.1	248.03	294.82	628.52	467	323.46	265.95	463.447
ssc-miR-218-5p	200.8	285.8	483.42	281.72	267.89	247.57	294.82	628.35	466.9	323.34	265.727	463.357
ssc-miR-218	200.8	285.8	483.42	281.72	267.89	247.57	294.82	628.35	466.9	323.34	265.727	463.357
Chr07_18861	0	0	0	0	0	0	761.5	316.32	297.99	0	0	458.603
Chr16_38466	1043.56	780.64	912.24	371.7	1017.04	493.78	571.12	316.32	446.99	912.147	627.507	444.81
Chr10_24748	618.41	229.6	304.08	451.35	508.52	432.06	723.42	197.7	404.42	384.03	463.977	441.847
ssc-miR-150	109.89	95.67	154.69	180.04	164.22	265.31	466.21	277.9	543.79	120.083	203.19	429.3
Chr03_8157	1584.66	2801.12	1155.51	2256.74	2203.58	2222.02	304.6	395.4	574.7	1847.1	2227.45	424.9
Chr17_39950	115.95	0	243.26	79.65	56.5	92.58	418.82	395.4	446.99	119.737	76.2433	420.403
ChrX_41819	0	0	0	0	0	0	0	632.64	617.27	0	0	416.637
Chr18_40591	38.65	45.92	0	0	0	0	304.6	158.16	766.27	28.19	0	409.677
ssc-miR-32	179.89	248.12	161.14	680.92	571.75	665.52	335.25	477.45	401.74	196.383	639.397	404.813
Chr13_31732	0	45.92	0	3106.33	2627.34	2376.32	304.6	276.78	595.99	15.3067	2703.33	392.457
Chr12_27732	231.9	91.84	243.26	79.65	254.26	30.86	456.9	197.7	510.84	189	121.59	388.48
Chr07_18866	0	0	0	0	0	0	418.82	316.32	425.7	0	0	386.947
ssc-miR-146a-5p	65.98	180.93	188.07	161.8	122.5	165.15	374.52	307.43	462.43	144.993	149.817	381.46
ssc-miR-155-5p	201.73	406.94	441.49	493.59	578.13	374.59	323.25	333.04	423.69	350.053	482.103	359.993
ssc-miR-7134-3p	385.56	314.28	475.01	388.82	386.02	364.4	364.84	361.72	336.87	391.617	379.747	354.477
ssc-miR-148a-5p	165.61	266.96	245.29	246.02	256.18	262.07	298.68	376.06	376.31	225.953	254.757	350.35
ssc-miR-1271-5p	285.69	313.42	376.98	559.13	481.17	452.69	270.25	370.08	405.61	325.363	497.663	348.647
Chr14_31865	38.65	0	0	716.85	310.76	277.75	304.6	355.86	383.13	12.8833	435.12	347.863
ssc-miR-378b-3p	29.48	20.82	28.61	29.18	39.7	32.1	297.91	335.43	408.79	26.3033	33.66	347.377
ssc-miR-497	109.97	165.61	152.31	134.84	122.82	193.55	388.44	385.45	264.74	142.63	150.403	346.21
ssc-miR-221-3p	1395.98	1672.66	2246.43	1807.25	1676.82	1293.85	312.23	343.45	369.75	1771.69	1592.64	341.81
ssc-miR-185	146.47	101.69	107.15	163.13	142.4	121.16	374.32	360.69	284.71	118.437	142.23	339.907
ssc-miR-340	332.62	405.05	273.06	389.26	393.9	299.42	285.53	311.36	369.45	336.91	360.86	322.113
Chr14_33679	773.01	137.76	121.63	584.1	649.77	709.81	609.2	237.24	106.43	344.133	647.893	317.623
ssc-miR-19b	602.49	589.84	416.81	579.8	566.53	461.33	265.8	427.44	257.89	536.38	535.887	317.043
Scaffold196_43163	270.55	551.04	425.71	159.3	254.26	524.64	380.75	158.16	404.42	415.767	312.733	314.443
Chr07_19849	193.25	0	243.26	557.55	452.02	771.53	266.52	118.62	553.42	145.503	593.7	312.853
Chr18_40844	0	0	0	26.55	56.5	61.72	342.67	158.16	425.7	0	48.2567	308.843
ssc-miR-20a-5p	570.54	569.02	505.16	470.6	485.54	389.25	283.79	365.3	265.04	548.24	448.463	304.71
Chr14_32100	0	0	0	849.6	1130.04	1388.76	228.45	158.16	510.84	0	1122.8	299.15
Chr18_40382	0	321.44	60.82	0	113	0	494.97	118.62	276.71	127.42	37.6667	296.767
Chr03_7854	347.85	229.6	304.08	318.6	593.27	277.75	190.37	39.54	659.84	293.843	396.54	296.583
ssc-miR-149	10.26	8.78	14.16	14.7	17.99	29.33	316.1	255.37	273.09	11.0667	20.6733	281.52
ssc-miR-144	83.35	122.51	55.26	615.61	288.21	561.5	240.07	367.18	235.94	87.04	488.44	281.063
ChrX_42092	231.9	229.6	486.53	185.85	84.75	246.89	304.6	79.08	446.99	316.01	172.497	276.89
ssc-miR-362	60.74	81.04	72.79	74.6	69.82	60.35	276.05	279.1	269.61	71.5233	68.2567	274.92
ssc-miR-505	459.87	410.81	511.33	584.88	702.87	581.72	281.08	258.27	280.14	460.67	623.157	273.163
Chr07_19141	193.25	45.92	547.35	79.65	28.25	0	152.3	276.78	383.13	262.173	35.9667	270.737
ssc-miR-503	48.7	27.7	51.61	48.08	60.98	54.17	306.23	340.04	157.46	42.67	54.41	267.91
ssc-let-7d-3p	20.68	38.37	44.18	51.5	38.95	43.22	249.36	243.25	303.69	34.41	44.5567	265.433
ssc-miR-223	260.92	238.14	227.48	205.79	187.64	299.42	278.37	238.3	269.91	242.18	230.95	262.193
Chr07_20261	193.25	137.76	486.53	185.85	84.75	246.89	266.52	158.16	361.85	272.513	172.497	262.177
ssc-miR-411	1.39	0.86	2.95	2.1	2.66	1.39	320.54	252.13	211.8	1.73333	2.05	261.49
ssc-miR-374b-5p	115.76	229.37	72.09	249.78	240	309.15	236.59	248.88	279.94	139.073	266.31	255.137
Chr16_38753	231.9	229.6	486.53	424.8	367.26	61.72	190.37	276.78	297.99	316.01	284.593	255.047
ssc-miR-17-5p	202.43	221.88	208.96	199.49	185.3	185.52	263.48	303.68	170.17	211.09	190.103	245.777
Chr05_13416	0	0	0	0	28.25	0	0	711.72	21.29	0	9.41667	244.337
Chr12_28743	386.5	826.56	243.26	185.85	339.01	123.45	38.07	434.94	255.42	485.44	216.103	242.81
Chr07_17796	386.5	826.56	243.26	185.85	339.01	123.45	38.07	434.94	255.42	485.44	216.103	242.81
Chr03_8533	231.9	229.6	425.71	185.85	84.75	216.03	304.6	79.08	340.56	295.737	162.21	241.413
Chr15_37334	0	45.92	0	1592.99	1101.79	2777.52	152.3	79.08	489.56	15.3067	1824.1	240.313
Chr15_34957	38.65	137.76	182.45	132.75	84.75	0	266.52	197.7	255.42	119.62	72.5	239.88
Chr08_21209	38.65	0	60.82	53.1	56.5	0	76.15	276.78	361.85	33.1567	36.5333	238.26
ssc-miR-22-5p	544.61	365.21	415.82	301.95	307.9	301.59	219.56	260.15	231.66	441.88	303.813	237.123
ssc-miR-181c	35.19	73.82	56.52	110.85	93.13	85.2	215.7	275.34	199.38	55.1767	96.3933	230.14
ssc-miR-452	5.4	4.73	5.33	3.21	8.09	4.94	277.79	232.15	171.46	5.15333	5.41333	227.133
ssc-miR-331-3p	71.39	50.5	59.88	188.66	173.16	182.28	250.71	211.16	217.66	60.59	181.367	226.51
ssc-miR-95	138.22	131.98	187.93	120.03	147.19	125.63	239.49	202.45	215.07	152.71	130.95	219.003
Chr18_40727	309.2	229.6	182.45	3132.88	3842.13	2098.57	190.37	79.08	383.13	240.417	3024.53	217.527
Chr18_40578	77.3	0	0	238.95	28.25	123.45	418.82	39.54	170.28	25.7667	130.217	209.547
Chr18_40577	77.3	0	0	238.95	28.25	123.45	418.82	39.54	170.28	25.7667	130.217	209.547
ssc-miR-29c	200.26	181.36	232.53	197.5	198.6	219.78	201.96	253.66	169.38	204.717	205.293	208.333
Chr01_1204	154.6	45.92	0	212.4	226.01	339.47	38.07	434.94	149	66.84	259.293	207.337
Chr01_1203	154.6	45.92	0	212.4	226.01	339.47	38.07	434.94	149	66.84	259.293	207.337
Chr07_17941	154.6	91.84	60.82	185.85	226.01	92.58	190.37	39.54	383.13	102.42	168.147	204.347
Chr02_5893	386.5	826.56	243.26	185.85	339.01	123.45	38.07	316.32	255.42	485.44	216.103	203.27
Chr06_16339	154.6	0	304.08	185.85	226.01	154.31	114.22	158.16	319.28	152.893	188.723	197.22
Chr07_18850	0	0	0	0	0	0	456.9	39.54	85.14	0	0	193.86
Scaffold1533_43934	38.65	1239.84	6689.78	132.75	197.76	0	190.37	197.7	191.57	2656.09	110.17	193.213
Chr05_13072	231.9	1423.52	1702.85	26.55	28.25	185.17	266.52	158.16	149	1119.42	79.99	191.227
Chr09_22766	850.31	1423.52	1337.96	796.5	1779.81	493.78	152.3	118.62	297.99	1203.93	1023.36	189.637
ssc-miR-1343	16.9	19.96	34.22	45.87	35.34	42.91	199.25	162.34	206.23	23.6933	41.3733	189.273
Chr06_14963	309.2	413.28	243.26	371.7	197.76	154.31	342.67	118.62	106.43	321.913	241.257	189.24
ssc-miR-214-5p	35.42	28.3	41.93	47.86	52.04	64.36	204.28	230.45	131.63	35.2167	54.7533	188.787
Chr05_13197	38.65	0	0	265.5	226.01	493.78	228.45	237.24	85.14	12.8833	328.43	183.61
Chr05_12541	0	0	0	26.55	28.25	0	380.75	39.54	127.71	0	18.2667	182.667
Chr07_19396	115.95	0	60.82	0	0	0	266.52	39.54	234.14	58.9233	0	180.067
Scaffold1223_43865	77.3	45.92	0	0	0	30.86	190.37	158.16	191.57	41.0733	10.2867	180.033
Chr01_989	1314.11	826.56	851.43	663.75	678.02	123.45	76.15	158.16	297.99	997.367	488.407	177.433
Chr07_18878	0	0	0	26.55	0	0	266.52	197.7	63.86	0	8.85	176.027
ssc-miR-142-3p	219.02	253.97	155.81	710.32	445.31	702.72	169.27	199.89	147.72	209.6	619.45	172.293
ssc-miR-7134-5p	61.51	69.69	50.77	133.18	134.1	152.18	200.8	123.76	185.57	60.6567	139.82	170.043
ssc-miR-222	713.7	482.99	535.03	938.88	772.37	630.64	154.57	178.38	168.88	577.24	780.63	167.277
Chr16_38486	231.9	45.92	60.82	398.25	226.01	216.03	266.52	39.54	191.57	112.88	280.097	165.877
Chr05_12419	115.95	0	60.82	212.4	141.25	925.84	190.37	79.08	212.85	58.9233	426.497	160.767
ssc-miR-9-2	27.4	30.46	44.32	48.63	42.36	38.28	154.76	116.93	207.92	34.06	43.09	159.87
ssc-miR-9-1	27.4	30.46	44.32	48.63	42.36	38.28	154.76	116.93	207.92	34.06	43.09	159.87
ssc-miR-9	27.4	30.46	44.32	48.63	42.36	38.28	154.76	116.93	207.92	34.06	43.09	159.87
Chr06_17170	77.3	45.92	121.63	0	0	0	114.22	237.24	127.71	81.6167	0	159.723
ssc-miR-376a-3p	0.31	0.34	1.26	0.33	1.6	2.16	219.18	140.32	117.32	0.636667	1.36333	158.94
Chr09_23554	38.65	45.92	60.82	53.1	0	185.17	114.22	118.62	234.14	48.4633	79.4233	155.66
ssc-miR-4334-3p	117.23	85.43	123.27	102.56	101.75	113.44	153.21	143.73	168.18	108.643	105.917	155.04
ChrX_41309	38.65	0	0	26.55	84.75	0	76.15	118.62	255.42	12.8833	37.1	150.063
Chr01_2425	77.3	137.76	0	0	0	0	76.15	158.16	212.85	71.6867	0	149.053
Chr09_24219	0	0	0	79.65	84.75	524.64	228.45	39.54	170.28	0	229.68	146.09
Chr09_23108	0	0	0	79.65	84.75	524.64	228.45	39.54	170.28	0	229.68	146.09
Chr04_10516	0	0	0	26.55	56.5	0	38.07	197.7	191.57	0	27.6833	142.447
Chr04_10515	0	0	0	26.55	56.5	0	38.07	197.7	191.57	0	27.6833	142.447
ssc-miR-660	42.45	34.07	35.2	41.67	46.08	36.27	152.44	155.34	118.51	37.24	41.34	142.097
ssc-miR-342	49.62	50.24	83.45	86.21	62.69	68.53	143.54	127	152.69	61.1033	72.4767	141.077
Chr07_18679	38.65	0	0	26.55	0	0	0	316.32	106.43	12.8833	8.85	140.917
Chr05_13524	5179.14	10332	7419.57	1539.89	2909.85	925.84	114.22	158.16	149	7643.57	1791.86	140.46
ssc-miR-224	1	1.29	0.7	2.21	5.75	3.86	142.57	145.95	132.52	0.996667	3.94	140.347
Chr03_9528	0	45.92	0	0	0	92.58	190.37	118.62	106.43	15.3067	30.86	138.473
Chr03_9527	0	45.92	0	0	0	92.58	190.37	118.62	106.43	15.3067	30.86	138.473
ssc-miR-370	0.46	0.34	3.09	0.66	1.28	0.31	207.18	130.76	76.79	1.29667	0.75	138.243
Chr07_18916	0	0	0	0	0	0	152.3	197.7	63.86	0	0	137.953
Chr02_7024	0	0	0	0	56.5	0	76.15	316.32	21.29	0	18.8333	137.92
ssc-miR-361-3p	148.17	81.39	188.49	196.4	165.93	181.51	114.13	132.12	166.6	139.35	181.28	137.617
Chr06_15340	115.95	0	60.82	0	0	0	190.37	158.16	63.86	58.9233	0	137.463
Chr06_15339	115.95	0	60.82	0	0	0	190.37	158.16	63.86	58.9233	0	137.463
ssc-miR-143-5p	18.14	38.03	38.15	39.35	32.67	35.19	144.12	101.06	166.1	31.44	35.7367	137.093
Chr10_25851	115.95	45.92	0	79.65	84.75	30.86	342.67	0	63.86	53.9567	65.0867	135.51
Chr17_39919	77.3	0	121.63	132.75	197.76	92.58	114.22	79.08	212.85	66.31	141.03	135.383
Chr13_30059	38.65	0	0	0	56.5	154.31	114.22	79.08	212.85	12.8833	70.27	135.383
Chr02_7018	0	91.84	121.63	26.55	0	0	76.15	197.7	127.71	71.1567	8.85	133.853
Chr02_7017	0	91.84	121.63	26.55	0	0	76.15	197.7	127.71	71.1567	8.85	133.853
Chr02_6396	77.3	137.76	0	79.65	28.25	92.58	190.37	39.54	170.28	71.6867	66.8267	133.397
ssc-miR-24-1-5p	25.54	27.7	28.19	25.09	26.61	25.31	127.48	150.56	121.89	27.1433	25.67	133.31
ssc-miR-190a	10.73	10.24	6.31	25.31	19.37	18.83	122.65	121.88	151.4	9.09333	21.17	131.977
Chr06_14395	38.65	0	0	53.1	0	30.86	114.22	237.24	42.57	12.8833	27.9867	131.343
Chr14_33561	38.65	0	0	132.75	113	123.45	152.3	197.7	42.57	12.8833	123.067	130.857
Chr02_5113	347.85	229.6	547.35	345.15	480.27	555.5	228.45	118.62	42.57	374.933	460.307	129.88
Chr02_5477	38.65	275.52	243.26	238.95	226.01	30.86	76.15	79.08	234.14	185.81	165.273	129.79
ssc-miR-1249	9.72	14.45	17.11	25.86	22.03	28.55	133.67	99.52	153.28	13.76	25.48	128.823
Chr12_27284	115.95	183.68	425.71	743.4	339.01	308.61	0	237.24	149	241.78	463.673	128.747
Chr12_27283	115.95	183.68	425.71	743.4	339.01	308.61	0	237.24	149	241.78	463.673	128.747
Chr07_17506	115.95	183.68	425.71	743.4	339.01	308.61	0	237.24	149	241.78	463.673	128.747
ssc-miR-382	1.77	0.95	1.54	0.77	1.6	0.77	136.77	110.61	135.8	1.42	1.04667	127.727
Chr07_18608	38.65	0	0	159.3	169.51	123.45	152.3	79.08	149	12.8833	150.753	126.793
ssc-miR-500-5p	15.28	19.7	22.72	26.86	17.67	23.31	140.64	128.03	108.48	19.2333	22.6133	125.717
ssc-miR-424-3p	14.74	14.8	19.07	18.13	18.94	17.44	140.83	116.59	115.43	16.2033	18.17	124.283
ssc-miR-769-5p	75.32	52.74	63.39	80.68	67.48	77.63	113.75	119.15	136.1	63.8167	75.2633	123
ssc-miR-500-3p	19.6	19.27	19.35	24.76	29.59	25.31	112.78	118.47	126.76	19.4067	26.5533	119.337
Chr02_7106	0	0	0	0	0	0	114.22	158.16	85.14	0	0	119.173
ssc-miR-196b-5p	0.77	0.6	1.4	1.44	3.62	2.78	2.71	9.56	341.24	0.923333	2.61333	117.837
ssc-miR-326	10.73	10.93	18.93	42.11	36.61	51.09	142.77	103.96	104.01	13.53	43.27	116.913
Chr06_13970	0	137.76	304.08	26.55	28.25	30.86	152.3	197.7	0	147.28	28.5533	116.667
Chr06_13969	0	137.76	304.08	26.55	28.25	30.86	152.3	197.7	0	147.28	28.5533	116.667
ssc-miR-299	0.54	0	2.1	0.88	1.81	1.39	137.35	87.91	124.18	0.88	1.36	116.48
Chr15_34484	0	0	0	0	0	0	266.52	39.54	42.57	0	0	116.21
ssc-miR-425-3p	80.49	41.81	99.57	109.53	93.34	104.95	139.67	89.62	111.76	73.9567	102.607	113.683
Chr04_11297	0	0	0	0	28.25	0	190.37	39.54	106.43	0	9.41667	112.113
Chr07_18970	38.65	0	0	0	0	0	152.3	118.62	63.86	12.8833	0	111.593
ssc-miR-130b-5p	21.38	27.53	28.19	27.96	27.35	28.09	101.37	110.44	119.31	25.7	27.8	110.373
ssc-miR-708-5p	5.79	7.57	7.43	4.53	2.77	2.47	103.69	132.12	93.28	6.93	3.25667	109.697
Chr05_13036	115.95	367.36	790.61	265.5	84.75	0	114.22	39.54	170.28	424.64	116.75	108.013
Chr03_9846	193.25	321.44	182.45	345.15	254.26	123.45	0	39.54	276.71	232.38	240.953	105.417
Chr07_17885	38.65	91.84	0	26.55	169.51	123.45	0	39.54	276.71	43.4967	106.503	105.417
ssc-miR-574-5p	18.06	17.21	15.99	15.8	22.99	19.45	135.22	106.86	73.51	17.0867	19.4133	105.197
Chr01_744	347.85	275.52	425.71	823.05	339.01	308.61	152.3	158.16	0	349.693	490.223	103.487
Chr05_12776	0	0	0	238.95	28.25	0	266.52	0	42.57	0	89.0667	103.03
Chr06_16914	0	91.84	0	26.55	56.5	61.72	0	158.16	149	30.6133	48.2567	102.387
ssc-miR-122-5p	334737	231650	279418	132112	160544	130773	126.9	106.52	70.04	281935	141143	101.153
ssc-miR-18a	48.54	41.12	35.9	73.83	65.99	51.24	91.69	131.1	77.39	41.8533	63.6867	100.06
Chr02_7181	38.65	91.84	60.82	53.1	197.76	61.72	114.22	118.62	63.86	63.77	104.193	98.9
Chr01_2823	0	0	0	0	0	0	114.22	118.62	63.86	0	0	98.9
Chr15_37500	0	0	0	0	0	0	38.07	118.62	127.71	0	0	94.8
Chr08_21023	0	0	0	0	0	0	38.07	118.62	127.71	0	0	94.8
Chr14_33972	115.95	0	0	265.5	0	92.58	76.15	118.62	85.14	38.65	119.36	93.3033
ssc-miR-193a-3p	6.41	11.44	9.96	14.37	15.43	29.33	102.72	81.25	92.69	9.27	19.71	92.22
Chr07_19307	541.1	367.36	364.9	238.95	254.26	154.31	76.15	197.7	0	424.453	215.84	91.2833
Chr07_17856	541.1	367.36	364.9	238.95	254.26	154.31	76.15	197.7	0	424.453	215.84	91.2833
Chr01_1210	0	0	0	0	0	0	38.07	0	234.14	0	0	90.7367
Chr13_29756	77.3	0	121.63	26.55	28.25	30.86	0	79.08	191.57	66.31	28.5533	90.2167
Chr02_6874	193.25	0	0	53.1	84.75	0	38.07	79.08	149	64.4167	45.95	88.7167
ssc-miR-328	14.66	13.42	33.1	46.31	37.68	40.9	101.17	73.74	90.7	20.3933	41.63	88.5367
ssc-miR-1307	19.45	22.63	27.63	35.04	24.9	28.71	96.72	84.33	80.47	23.2367	29.55	87.1733
Chr14_33771	38.65	0	0	79.65	28.25	216.03	0	237.24	21.29	12.8833	107.977	86.1767
Chr02_7276	0	45.92	60.82	0	0	92.58	114.22	79.08	63.86	35.58	30.86	85.72
ssc-miR-133a-3p	76.17	120.02	166.19	71.95	42.36	31.02	66.16	59.58	129.14	120.793	48.4433	84.96
ssc-miR-130a	57.8	67.97	67.46	103.01	87.49	89.06	81.83	107.88	64.77	64.41	93.1867	84.8267
ssc-miR-296-3p	8.1	6.19	7.01	19.01	13.3	10.19	106.59	86.72	60.9	7.1	14.1667	84.7367
ssc-miR-708-3p	1.39	2.15	5.47	3.21	2.66	2.93	62.1	94.91	92.49	3.00333	2.93333	83.1667
Chr07_17509	0	0	0	0	0	0	38.07	79.08	127.71	0	0	81.62
Chr03_7634	38.65	45.92	0	53.1	0	0	114.22	0	127.71	28.19	17.7	80.6433
Chr03_8549	38.65	45.92	0	0	28.25	0	0	237.24	0	28.19	9.41667	79.08
Chr03_7988	0	0	60.82	0	56.5	0	38.07	197.7	0	20.2733	18.8333	78.59
ssc-miR-323	0.31	0.43	2.95	0.77	0.53	0.46	85.7	62.65	87.32	1.23	0.586667	78.5567
Chr03_8936	0	0	0	132.75	0	30.86	76.15	158.16	0	0	54.5367	78.1033
ssc-miR-331-5p	35.58	46.2	41.51	77.37	49.17	67.91	85.12	76.47	71.82	41.0967	64.8167	77.8033
ssc-miR-2320-5p	10.57	12.65	13.46	17.24	18.73	19.45	83.18	70.67	79.08	12.2267	18.4733	77.6433
Chr02_4243	38.65	91.84	60.82	0	28.25	0	38.07	39.54	149	63.77	9.41667	75.5367
Chr13_29074	347.85	183.68	425.71	557.55	536.77	401.2	38.07	79.08	106.43	319.08	498.507	74.5267
Chr12_27464	77.3	0	60.82	0	0	30.86	0	158.16	63.86	46.04	10.2867	74.0067
Chr12_27463	77.3	0	60.82	0	0	30.86	0	158.16	63.86	46.04	10.2867	74.0067
ssc-miR-181d-5p	18.06	26.93	21.04	35.48	18.94	24.85	71.19	72.72	78.08	22.01	26.4233	73.9967
Chr02_5292	77.3	91.84	60.82	0	28.25	0	38.07	118.62	63.86	76.6533	9.41667	73.5167
Chr01_1597	38.65	0	0	345.15	113	246.89	38.07	118.62	63.86	12.8833	235.013	73.5167
Chr12_28572	0	91.84	0	0	0	30.86	38.07	118.62	63.86	30.6133	10.2867	73.5167
ssc-miR-196a	0.08	0.26	0.7	0.11	0.53	0	59.58	35.68	125.17	0.346667	0.213333	73.4767
ssc-miR-30c-3p	43.53	45	42.21	72.61	80.14	80.72	83.57	55.31	78.78	43.58	77.8233	72.5533
ChrX_42528	657.06	1882.72	851.43	345.15	197.76	339.47	114.22	39.54	63.86	1130.4	294.127	72.54
ssc-miR-455-5p	23.23	19.7	19.35	31.5	25.97	31.95	71.19	80.74	64.37	20.76	29.8067	72.1
Chr12_28854	0	91.84	60.82	0	84.75	30.86	152.3	0	63.86	50.8867	38.5367	72.0533
Chr01_2559	0	0	0	0	0	0	0	39.54	170.28	0	0	69.94
ssc-miR-194a-5p	35454.9	40390.1	35485	55319.3	55293.4	59292.5	69.06	79.55	59.41	37110	56635.1	69.34
ssc-miR-758	0.23	0.43	1.54	0.66	0.75	0.31	68.09	73.91	65.07	0.733333	0.573333	69.0233
Chr14_34167	0	91.84	60.82	0	0	0	0	79.08	127.71	50.8867	0	68.93
Scaffold450_43634	0	0	0	0	56.5	0	76.15	0	127.71	0	18.8333	67.9533
Chr16_37964	0	0	0	0	0	0	0	118.62	85.14	0	0	67.92
ssc-miR-130b-3p	19.37	17.38	19.63	31.5	27.78	26.7	72.93	80.57	50.07	18.7933	28.66	67.8567
Chr07_18892	0	0	0	0	0	30.86	38.07	79.08	85.14	0	10.2867	67.43
Chr07_18390	154.6	413.28	60.82	26.55	141.25	0	76.15	39.54	85.14	209.567	55.9333	66.9433
Chr14_31767	0	45.92	0	0	0	0	114.22	0	85.14	15.3067	0	66.4533
Chr02_6989	115.95	229.6	182.45	106.2	28.25	61.72	38.07	118.62	42.57	176	65.39	66.42
Chr15_34631	0	0	0	0	0	0	76.15	79.08	42.57	0	0	65.9333
Chr02_4007	0	0	0	0	0	92.58	76.15	79.08	42.57	0	30.86	65.9333
Chr16_38247	0	275.52	547.35	53.1	0	61.72	38.07	158.16	0	274.29	38.2733	65.41
Chr05_11955	0	0	0	0	0	0	38.07	158.16	0	0	0	65.41
Chr07_18343	0	0	0	0	84.75	30.86	152.3	0	42.57	0	38.5367	64.9567
Chr05_13199	0	0	0	0	0	154.31	76.15	118.62	0	0	51.4367	64.9233
Chr16_38052	0	45.92	0	0	0	0	152.3	39.54	0	15.3067	0	63.9467
ChrX_42572	38.65	0	60.82	0	0	0	0	0	191.57	33.1567	0	63.8567
Chr13_29068	0	0	0	0	0	30.86	0	0	191.57	0	10.2867	63.8567
Chr13_29067	0	0	0	0	0	30.86	0	0	191.57	0	10.2867	63.8567
ssc-miR-486	41.36	55.15	63.39	36.8	25.86	31.33	53.97	56.33	80.27	53.3	31.33	63.5233
Chr06_14464	0	0	0	0	0	0	190.37	0	0	0	0	63.4567
Chr02_7101	0	0	60.82	26.55	0	0	190.37	0	0	20.2733	8.85	63.4567
Chr01_3355	77.3	0	60.82	0	113	0	0	79.08	106.43	46.04	37.6667	61.8367
Chr13_28976	115.95	0	0	132.75	0	92.58	0	158.16	21.29	38.65	75.11	59.8167
Chr12_26840	0	0	0	79.65	0	0	0	158.16	21.29	0	26.55	59.8167
Chr07_19803	77.3	0	0	26.55	0	0	114.22	0	63.86	25.7667	8.85	59.36
Chr06_16474	0	91.84	0	0	0	0	0	0	170.28	30.6133	0	56.76
Chr02_5024	0	0	0	0	141.25	0	0	0	170.28	0	47.0833	56.76
ssc-miR-29b	96.78	132.23	121.03	210.88	156.67	213.46	66.55	60.6	42.72	116.68	193.67	56.6233
ChrX_41451	0	0	0	0	0	0	0	39.54	127.71	0	0	55.75
Chr12_28254	0	0	60.82	0	0	0	0	39.54	127.71	20.2733	0	55.75
Chr12_28238	0	0	60.82	0	0	0	0	39.54	127.71	20.2733	0	55.75
ssc-miR-744	12.89	20.3	18.79	31.06	29.8	32.41	51.46	58.04	55.73	17.3267	31.09	55.0767
ssc-miR-338	1.62	3.1	1.96	3.21	1.92	6.64	31.34	61.62	70.73	2.22667	3.92333	54.5633
ssc-miR-450c-3p	5.87	5.68	6.73	6.96	8.51	7.56	68.09	57.36	37.15	6.09333	7.67667	54.2
Chr10_25757	193.25	229.6	304.08	292.05	310.76	92.58	0	118.62	42.57	242.31	231.797	53.73
ChrX_41542	0	0	0	0	0	30.86	0	118.62	42.57	0	10.2867	53.73
Chr17_39355	154.6	0	0	159.3	282.51	123.45	38.07	79.08	42.57	51.5333	188.42	53.24
Chr09_22719	0	0	0	53.1	0	0	38.07	79.08	42.57	0	17.7	53.24
Chr04_11782	0	0	121.63	53.1	84.75	92.58	76.15	39.54	42.57	40.5433	76.81	52.7533
Chr07_18823	309.2	91.84	60.82	159.3	113	30.86	0	158.16	0	153.953	101.053	52.72
Scaffold2582_44145	38.65	0	0	53.1	0	61.72	38.07	118.62	0	12.8833	38.2733	52.23
Chr06_14685	0	0	0	0	113	0	38.07	118.62	0	0	37.6667	52.23
Chr02_6182	0	0	0	0	0	0	76.15	79.08	0	0	0	51.7433
Chr14_32624	0	0	0	79.65	0	30.86	114.22	39.54	0	0	36.8367	51.2533
Chr13_31022	0	0	60.82	0	0	0	114.22	39.54	0	20.2733	0	51.2533
Chr12_28576	0	45.92	60.82	26.55	28.25	154.31	114.22	39.54	0	35.58	69.7033	51.2533
Chr08_20991	0	0	0	0	141.25	0	114.22	39.54	0	0	47.0833	51.2533
Chr02_4087	0	183.68	0	79.65	0	0	114.22	39.54	0	61.2267	26.55	51.2533
Chr02_6348	115.95	137.76	60.82	238.95	226.01	308.61	152.3	0	0	104.843	257.857	50.7667
Chr09_23221	0	0	0	0	0	0	152.3	0	0	0	0	50.7667
Chr04_9998	0	229.6	121.63	26.55	56.5	154.31	152.3	0	0	117.077	79.12	50.7667
Chr03_7562	0	0	0	0	56.5	0	152.3	0	0	0	18.8333	50.7667
ssc-miR-10383	106.04	81.47	103.08	186.12	179.66	225.96	75.83	38.41	37.75	96.8633	197.247	50.6633
ssc-miR-324	5.17	6.19	7.01	8.73	9.9	12.04	60.16	50.7	39.74	6.12333	10.2233	50.2
ssc-miR-493-5p	0.23	0.52	0.42	0.99	0.32	0.46	45.46	38.75	65.66	0.39	0.59	49.9567
ssc-miR-148b-5p	9.96	14.37	12.2	37.14	27.88	33.34	47.78	50.19	51.86	12.1767	32.7867	49.9433
Chr14_33907	0	0	0	0	0	0	0	0	149	0	0	49.6667
Chr10_25560	0	0	0	0	0	0	0	0	149	0	0	49.6667
Chr09_23387	0	0	0	0	0	0	0	0	149	0	0	49.6667
Chr02_6622	0	0	0	0	0	0	0	0	149	0	0	49.6667
ssc-miR-136-5p	0	0.17	0.28	1.22	0.75	0.46	51.07	52.41	42.22	0.15	0.81	48.5667
Chr04_11051	270.55	321.44	364.9	26.55	113	154.31	38.07	0	106.43	318.963	97.9533	48.1667
Chr14_33328	0	0	0	26.55	0	0	38.07	0	106.43	0	8.85	48.1667
Chr06_13929	0	0	0	53.1	0	0	38.07	0	106.43	0	17.7	48.1667
ssc-miR-132	11.27	8.17	13.18	4.86	2.02	2.78	49.52	51.38	43.41	10.8733	3.22	48.1033
Chr15_34785	0	0	0	53.1	28.25	0	0	79.08	63.86	0	27.1167	47.6467
Chr12_28449	0	0	0	132.75	0	0	0	79.08	63.86	0	44.25	47.6467
Chr06_15557	0	0	0	53.1	28.25	0	0	79.08	63.86	0	27.1167	47.6467
Chr13_29965	0	0	0	79.65	84.75	0	76.15	0	63.86	0	54.8	46.67
ssc-miR-1842	12.73	10.32	10.66	21.77	13.09	10.5	54.94	47.63	37.35	11.2367	15.12	46.64
Chr12_28094	0	0	121.63	79.65	0	61.72	0	118.62	21.29	40.5433	47.1233	46.6367
Chr06_17061	0	0	60.82	53.1	84.75	92.58	0	118.62	21.29	20.2733	76.81	46.6367
Chr01_2480	0	0	60.82	53.1	84.75	92.58	0	118.62	21.29	20.2733	76.81	46.6367
Chr18_40166	347.85	321.44	121.63	0	0	0	76.15	39.54	21.29	263.64	0	45.66
Chr12_27965	0	0	0	0	0	0	76.15	39.54	21.29	0	0	45.66
Chr02_7160	77.3	91.84	60.82	53.1	0	30.86	114.22	0	21.29	76.6533	27.9867	45.17
Chr02_7159	77.3	91.84	60.82	53.1	0	30.86	114.22	0	21.29	76.6533	27.9867	45.17
Chr01_1014	0	0	0	0	28.25	30.86	114.22	0	21.29	0	19.7033	45.17
Chr01_1013	0	0	0	0	28.25	30.86	114.22	0	21.29	0	19.7033	45.17
ssc-miR-204	242.79	246.4	315.13	1029.51	563.55	736.83	42.95	48.65	43.51	268.107	776.63	45.0367
ssc-miR-10388	14.74	22.71	26.51	37.47	34.06	33.03	45.27	41.48	46.89	21.32	34.8533	44.5467
ChrX_42518	502.45	2158.24	973.06	663.75	508.52	648.09	0	0	127.71	1211.25	606.787	42.57
Chr05_13587	38.65	0	0	79.65	56.5	0	0	0	127.71	12.8833	45.3833	42.57
Chr05_13233	0	183.68	0	53.1	0	0	0	0	127.71	61.2267	17.7	42.57
ssc-miR-374b-3p	12.5	23.32	15.57	32.71	34.48	43.06	32.69	39.43	51.86	17.13	36.75	41.3267
Chr02_5116	193.25	91.84	243.26	318.6	56.5	123.45	38.07	0	85.14	176.117	166.183	41.07
ssc-miR-345-3p	3.16	5.59	4.91	9.17	5.64	9.72	42.75	39.26	40.93	4.55333	8.17667	40.98
Chr06_15473	154.6	91.84	0	79.65	113	154.31	0	79.08	42.57	82.1467	115.653	40.55
Chr05_13660	0	0	0	0	0	0	0	79.08	42.57	0	0	40.55
ssc-miR-432-5p	0.08	0.26	0.84	0.33	0.85	0.31	46.81	34.99	38.74	0.393333	0.496667	40.18
Chr11_26413	0	0	0	0	28.25	61.72	76.15	0	42.57	0	29.99	39.5733
Chr09_23163	0	0	0	0	0	0	76.15	0	42.57	0	0	39.5733
Chr01_2117	38.65	91.84	0	53.1	28.25	0	0	118.62	0	43.4967	27.1167	39.54
Chr03_8363	0	0	0	0	0	0	0	118.62	0	0	0	39.54
ssc-miR-21-3p	3.32	2.84	5.33	12.6	11.39	15.43	37.53	59.75	21.06	3.83	13.14	39.4467
Chr02_7151	38.65	0	0	106.2	84.75	61.72	38.07	79.08	0	12.8833	84.2233	39.05
Chr12_27942	0	91.84	22380.3	53.1	0	0	38.07	79.08	0	7490.73	17.7	39.05
Chr07_18083	0	45.92	0	0	0	0	38.07	79.08	0	15.3067	0	39.05
Chr06_15362	0	0	0	0	0	0	38.07	79.08	0	0	0	39.05
Chr05_11940	0	0	0	0	0	0	38.07	79.08	0	0	0	39.05
ssc-miR-330	8.8	7.31	7.57	17.79	15.96	16.21	39.08	32.77	45	7.89333	16.6533	38.95
ssc-miR-1306-5p	5.25	4.39	5.19	18.79	9.37	15.43	39.27	37.9	38.74	4.94333	14.53	38.6367
Chr16_38716	154.6	0	121.63	0	28.25	0	76.15	39.54	0	92.0767	9.41667	38.5633
ssc-miR-146b	41.06	33.81	27.07	122.79	37.68	41.36	35.01	38.24	41.62	33.98	67.2767	38.29
Chr12_28941	193.25	0	364.9	53.1	480.27	0	114.22	0	0	186.05	177.79	38.0733
Chr07_19714	77.3	551.04	60.82	53.1	84.75	0	114.22	0	0	229.72	45.95	38.0733
Chr17_39043	0	0	0	0	0	0	114.22	0	0	0	0	38.0733
Chr10_25748	0	0	0	26.55	28.25	0	114.22	0	0	0	18.2667	38.0733
Chr07_17825	0	0	0	0	0	0	114.22	0	0	0	0	38.0733
ssc-miR-454	14.2	12.3	9.12	20.45	20.75	11.11	37.34	44.72	30.5	11.8733	17.4367	37.52
ssc-miR-92b-3p	17.13	22.45	34.5	44.98	31.61	37.81	42.56	31.07	36.56	24.6933	38.1333	36.73
ssc-miR-6516	20.45	31.4	25.1	28.96	25.86	35.65	23.99	38.58	46.89	25.65	30.1567	36.4867
ssc-miR-19a	53.79	46.97	22.58	74.49	53.64	53.87	33.27	51.89	23.54	41.1133	60.6667	36.2333
ssc-miR-421-3p	9.96	14.8	6.73	10.72	12.77	10.8	37.53	33.8	37.15	10.4967	11.43	36.16
ssc-miR-99a-3p	18.98	21.51	26.37	12.05	16.07	16.36	37.53	39.94	29.8	22.2867	14.8267	35.7567
ssc-miR-532-3p	3.24	6.97	4.07	9.5	13.3	10.65	35.01	33.63	35.86	4.76	11.15	34.8333
Chr05_12119	77.3	0	0	0	0	30.86	0	39.54	63.86	25.7667	10.2867	34.4667
Chr03_9333	38.65	0	243.26	26.55	169.51	123.45	0	39.54	63.86	93.97	106.503	34.4667
Chr12_26925	0	0	0	53.1	84.75	0	0	39.54	63.86	0	45.95	34.4667
ssc-miR-106a	10.34	7.74	9.82	13.82	12.35	12.96	41.78	39.6	21.86	9.3	13.0433	34.4133
Chr14_31864	38.65	0	0	0	0	0	38.07	0	63.86	12.8833	0	33.9767
Chr14_31863	38.65	0	0	0	0	0	38.07	0	63.86	12.8833	0	33.9767
Chr13_31571	0	459.2	486.53	371.7	169.51	61.72	38.07	0	63.86	315.243	200.977	33.9767
Chr13_31308	0	0	0	0	0	0	38.07	0	63.86	0	0	33.9767
Chr13_30518	0	0	0	0	0	0	38.07	0	63.86	0	0	33.9767
Chr08_21459	0	0	182.45	53.1	84.75	30.86	38.07	0	63.86	60.8167	56.2367	33.9767
Chr06_16416	0	45.92	182.45	0	197.76	0	38.07	0	63.86	76.1233	65.92	33.9767
Chr03_9487	0	0	0	0	0	0	38.07	0	63.86	0	0	33.9767
Chr09_24152	0	0	0	212.4	0	339.47	0	79.08	21.29	0	183.957	33.4567
Chr03_7846	38.65	91.84	0	26.55	0	61.72	38.07	39.54	21.29	43.4967	29.4233	32.9667
Chr01_3042	38.65	91.84	182.45	53.1	28.25	30.86	38.07	39.54	21.29	104.313	37.4033	32.9667
Chr06_16542	0	91.84	0	26.55	56.5	61.72	38.07	39.54	21.29	30.6133	48.2567	32.9667
Chr03_7688	0	229.6	0	0	0	123.45	38.07	39.54	21.29	76.5333	41.15	32.9667
ssc-miR-184	1	1.12	1.68	9.17	6.71	6.17	38.5	32.95	27.12	1.26667	7.35	32.8567
ssc-miR-182	49.93	43.27	47.96	82.89	55.77	78.25	30.18	37.73	30	47.0533	72.3033	32.6367
ssc-miR-20b	3.47	3.01	2.52	5.42	3.73	4.94	41.01	36.36	17.88	3	4.69667	31.75
ssc-miR-664-3p	16.44	16	22.44	23.98	16.6	17.75	33.27	25.95	35.66	18.2933	19.4433	31.6267
ssc-miR-10a-3p	21.15	37.51	22.58	22.1	20.54	17.6	35.21	34.14	25.13	27.08	20.08	31.4933
ssc-miR-192	34960.3	30533.6	32516.3	49449.4	45820.9	49415.8	34.82	29.02	28.71	32670.1	48228.7	30.85
ssc-miR-24-2-5p	27.01	25.72	31.84	43.32	38.85	48.15	29.21	33.8	27.62	28.19	43.44	30.21
ssc-miR-504	9.96	17.29	14.16	19.45	15.33	14.51	31.73	23.73	33.28	13.8033	16.43	29.58
Chr12_28456	38.65	0	0	0	0	61.72	0	0	85.14	12.8833	20.5733	28.38
Chr02_5397	38.65	45.92	304.08	0	28.25	92.58	0	0	85.14	129.55	40.2767	28.38
Chr18_40613	0	0	0	0	0	0	0	0	85.14	0	0	28.38
Chr06_14979	38.65	0	60.82	132.75	0	0	0	39.54	42.57	33.1567	44.25	27.37
Chr04_11168	38.65	183.68	0	0	56.5	0	0	39.54	42.57	74.11	18.8333	27.37
Scaffold1082_43822	0	229.6	121.63	106.2	0	123.45	38.07	0	42.57	117.077	76.55	26.88
Chr13_29204	0	0	0	0	0	0	38.07	0	42.57	0	0	26.88
Chr13_31423	38.65	45.92	60.82	0	0	0	0	79.08	0	48.4633	0	26.36
Chr12_27923	38.65	0	0	132.75	0	61.72	0	79.08	0	12.8833	64.8233	26.36
Chr02_3517	38.65	137.76	60.82	26.55	28.25	0	0	79.08	0	79.0767	18.2667	26.36
Chr18_40600	0	45.92	60.82	53.1	56.5	30.86	0	79.08	0	35.58	46.82	26.36
Chr11_25932	0	0	0	0	0	0	0	79.08	0	0	0	26.36
Chr07_18902	0	0	0	0	0	0	0	79.08	0	0	0	26.36
Chr06_14154	0	0	0	26.55	0	30.86	0	79.08	0	0	19.1367	26.36
Chr05_13105	0	0	0	0	0	0	0	79.08	0	0	0	26.36
Chr02_5802	0	0	0	0	0	0	0	79.08	0	0	0	26.36
Chr16_38146	0	0	0	0	0	0	38.07	39.54	0	0	0	25.87
Chr14_32007	0	0	0	0	0	0	38.07	39.54	0	0	0	25.87
Chr03_9232	0	0	0	53.1	28.25	0	38.07	39.54	0	0	27.1167	25.87
ssc-miR-7-3p	19.6	24.18	18.23	25.97	25.12	30.1	25.92	27.65	23.94	20.67	27.0633	25.8367
ssc-miR-27b-5p	3.01	2.75	3.09	7.63	7.98	4.48	18.18	32.26	26.33	2.95	6.69667	25.59
Chr01_992	115.95	183.68	60.82	26.55	56.5	30.86	76.15	0	0	120.15	37.97	25.3833
Chr14_33435	77.3	0	0	0	28.25	0	76.15	0	0	25.7667	9.41667	25.3833
Chr09_23183	77.3	0	0	0	0	0	76.15	0	0	25.7667	0	25.3833
Chr06_14801	77.3	0	0	0	0	0	76.15	0	0	25.7667	0	25.3833
Chr01_1147	77.3	0	121.63	132.75	0	30.86	76.15	0	0	66.31	54.5367	25.3833
Chr12_28697	38.65	0	0	0	0	123.45	76.15	0	0	12.8833	41.15	25.3833
Chr12_28695	38.65	0	0	0	0	123.45	76.15	0	0	12.8833	41.15	25.3833
Chr13_29942	0	0	0	53.1	0	30.86	76.15	0	0	0	27.9867	25.3833
Chr13_29941	0	0	0	53.1	0	30.86	76.15	0	0	0	27.9867	25.3833
Chr08_20900	0	0	0	0	0	61.72	76.15	0	0	0	20.5733	25.3833
Chr06_16292	0	0	0	0	28.25	0	76.15	0	0	0	9.41667	25.3833
ssc-miR-450b-3p	1.16	2.75	2.38	5.31	5.43	7.25	20.51	29.36	26.03	2.09667	5.99667	25.3
ssc-miR-628-5p	12.81	16	15.71	27.3	18.52	17.75	21.47	29.19	24.93	14.84	21.19	25.1967
ssc-let-7f-3p	4.17	5.85	9.96	12.93	12.24	15.74	22.44	29.02	22.05	6.66	13.6367	24.5033
ssc-miR-301	5.63	4.99	5.61	11.05	6.6	8.64	23.99	32.26	15.99	5.41	8.76333	24.08
ssc-miR-874	80.49	77	83.02	138.93	172.63	160.05	21.09	23.73	26.42	80.17	157.203	23.7467
ssc-miR-6529	6.95	6.54	6.17	8.07	12.98	9.57	28.44	22.36	19.77	6.55333	10.2067	23.5233
ssc-miR-542-5p	4.78	2.24	3.51	4.97	3.09	4.78	34.43	19.46	16.39	3.51	4.28	23.4267
ssc-miR-10384	2.7	3.53	1.4	4.42	3.41	4.78	25.92	22.36	21.56	2.54333	4.20333	23.28
ssc-miR-7142-3p	11.58	16.6	14.16	34.48	20.86	34.11	21.86	17.24	27.91	14.1133	29.8167	22.3367
ssc-miR-129a-5p	4.94	8.26	7.57	14.26	6.39	12.81	29.21	14.34	23.25	6.92333	11.1533	22.2667
ssc-miR-129b	4.94	8.26	7.57	14.26	6.39	12.81	29.21	14.34	23.15	6.92333	11.1533	22.2333
ssc-miR-17-3p	15.28	11.01	11.5	19.67	17.03	23.31	22.44	22.87	19.77	12.5967	20.0033	21.6933
Chr10_25754	888.96	2066.4	547.35	1646.09	1101.79	925.84	0	0	63.86	1167.57	1224.57	21.2867
Chr17_39868	38.65	0	0	0	0	0	0	0	63.86	12.8833	0	21.2867
Chr04_11054	38.65	45.92	0	0	0	0	0	0	63.86	28.19	0	21.2867
Chr18_40848	0	0	0	0	0	0	0	0	63.86	0	0	21.2867
Chr12_27780	0	0	0	0	0	0	0	0	63.86	0	0	21.2867
Chr12_27778	0	0	0	0	0	0	0	0	63.86	0	0	21.2867
Chr12_27681	0	0	0	0	28.25	0	0	0	63.86	0	9.41667	21.2867
ssc-miR-628-3p	14.59	22.37	13.88	10.5	14.05	10.8	15.48	28.68	19.67	16.9467	11.7833	21.2767
ssc-miR-221-5p	108.27	113.13	122.99	91.95	95.26	64.05	22.25	22.02	18.97	114.797	83.7533	21.08
ssc-miR-9843-3p	1.62	2.84	2.52	4.09	4.58	5.09	23.41	13.49	25.53	2.32667	4.58667	20.81
ssc-miR-615	0	0	0.42	0	0.11	0	23.41	19.8	18.97	0.14	0.036667	20.7267
ssc-miR-671-5p	2.93	1.63	1.54	4.75	3.73	3.7	23.6	24.24	14.11	2.03333	4.06	20.65
ssc-miR-26b-3p	8.8	12.3	9.26	26.97	24.8	34.26	18.96	19.63	23.35	10.12	28.6767	20.6467
Chr01_3236	193.25	45.92	0	106.2	197.76	0	0	39.54	21.29	79.7233	101.32	20.2767
Chr15_37676	38.65	0	60.82	0	0	0	0	39.54	21.29	33.1567	0	20.2767
Chr14_34042	0	0	0	0	0	0	0	39.54	21.29	0	0	20.2767
Chr06_14821	0	45.92	0	53.1	0	61.72	0	39.54	21.29	15.3067	38.2733	20.2767
Chr04_11230	0	45.92	121.63	345.15	84.75	61.72	0	39.54	21.29	55.85	163.873	20.2767
Chr02_5536	38.65	0	0	0	28.25	0	38.07	0	21.29	12.8833	9.41667	19.7867
Chr02_3729	38.65	0	0	0	28.25	0	38.07	0	21.29	12.8833	9.41667	19.7867
Scaffold873_43783	0	0	60.82	0	0	0	38.07	0	21.29	20.2733	0	19.7867
Chr16_37826	0	0	0	0	0	0	38.07	0	21.29	0	0	19.7867
Chr09_24355	0	0	0	0	0	0	38.07	0	21.29	0	0	19.7867
Chr02_5239	0	45.92	0	0	0	0	38.07	0	21.29	15.3067	0	19.7867
ssc-miR-365-5p	0.15	0	0	0.11	0.43	0	24.37	17.24	15.99	0.05	0.18	19.2
ssc-miR-2320-3p	5.63	6.62	6.45	7.07	9.15	5.4	18.96	17.07	20.27	6.23333	7.20667	18.7667
ssc-miR-2483	1.31	0.86	1.12	0.99	0.53	1.08	19.54	17.24	17.68	1.09667	0.866667	18.1533
ssc-miR-296-5p	2.32	2.15	1.54	4.75	4.15	5.56	19.15	19.63	14.5	2.00333	4.82	17.76
ssc-miR-493-3p	0.15	0.09	0.42	0.33	0.32	0.15	19.93	15.7	10.63	0.22	0.266667	15.42
ssc-miR-582-5p	10.11	11.96	18.65	11.16	12.98	12.81	14.51	14.34	17.19	13.5733	12.3167	15.3467
ssc-miR-206	16.13	20.05	28.19	9.28	1.92	2.16	9.48	4.1	31.79	21.4567	4.45333	15.1233
ssc-miR-664-5p	13.58	14.02	16.27	6.08	7.66	8.03	17.22	14.68	13.01	14.6233	7.25667	14.97
ssc-miR-491	3.32	3.1	2.95	4.75	5.22	6.33	15.67	16.56	11.82	3.12333	5.43333	14.6833
ssc-miR-1306-3p	3.7	3.01	2.95	5.31	5.53	3.55	13.54	13.66	16.49	3.22	4.79667	14.5633
ssc-miR-139-3p	11.58	14.45	6.45	9.73	8.51	9.41	15.67	13.14	14.21	10.8267	9.21667	14.34
ssc-miR-30b-3p	7.56	9.46	8.7	12.27	15.01	20.37	15.48	11.95	15.5	8.57333	15.8833	14.31
Chr08_22152	115.95	0	0	26.55	28.25	0	0	0	42.57	38.65	18.2667	14.19
ChrX_41978	38.65	183.68	60.82	0	28.25	61.72	0	0	42.57	94.3833	29.99	14.19
Chr13_29084	38.65	45.92	60.82	106.2	0	61.72	0	0	42.57	48.4633	55.9733	14.19
Chr02_6330	38.65	0	121.63	0	0	0	0	0	42.57	53.4267	0	14.19
Chr01_1175	38.65	0	0	0	0	30.86	0	0	42.57	12.8833	10.2867	14.19
Scaffold391_43502	0	0	0	0	0	0	0	0	42.57	0	0	14.19
Scaffold391_43501	0	0	0	0	0	0	0	0	42.57	0	0	14.19
Chr18_40289	0	0	0	0	0	0	0	0	42.57	0	0	14.19
Chr13_30897	0	0	0	0	0	0	0	0	42.57	0	0	14.19
Chr10_24767	0	0	0	0	0	0	0	0	42.57	0	0	14.19
Chr08_21029	0	0	0	0	0	0	0	0	42.57	0	0	14.19
Chr07_20000	0	0	0	132.75	0	0	0	0	42.57	0	44.25	14.19
Chr07_18913	0	0	0	0	0	0	0	0	42.57	0	0	14.19
Chr06_16512	0	0	0	26.55	84.75	154.31	0	0	42.57	0	88.5367	14.19
Chr05_12414	0	0	0	79.65	28.25	0	0	0	42.57	0	35.9667	14.19
Chr01_119	0	0	0	159.3	84.75	185.17	0	0	42.57	0	143.073	14.19
ssc-miR-545-3p	4.32	6.11	2.1	17.35	11.92	12.96	13.15	19.97	8.74	4.17667	14.0767	13.9533
ssc-miR-1296-5p	1.93	4.13	2.24	4.09	4.58	5.25	16.83	12.97	11.72	2.76667	4.64	13.84
Chr02_6753	115.95	0	0	132.75	0	0	0	39.54	0	38.65	44.25	13.18
ChrX_41101	38.65	0	0	26.55	0	0	0	39.54	0	12.8833	8.85	13.18
Chr02_7036	38.65	91.84	0	0	28.25	92.58	0	39.54	0	43.4967	40.2767	13.18
Scaffold434_43607	0	45.92	121.63	26.55	84.75	462.92	0	39.54	0	55.85	191.407	13.18
Chr18_40054	0	0	0	0	84.75	0	0	39.54	0	0	28.25	13.18
Chr16_37830	0	0	0	0	0	0	0	39.54	0	0	0	13.18
Chr14_33131	0	0	0	0	28.25	0	0	39.54	0	0	9.41667	13.18
Chr14_32072	0	0	0	0	0	61.72	0	39.54	0	0	20.5733	13.18
Chr14_31939	0	0	0	53.1	0	0	0	39.54	0	0	17.7	13.18
Chr13_29335	0	0	0	0	621.52	92.58	0	39.54	0	0	238.033	13.18
Chr09_22942	0	137.76	121.63	0	0	0	0	39.54	0	86.4633	0	13.18
Chr09_22260	0	0	0	0	0	0	0	39.54	0	0	0	13.18
Chr08_21275	0	229.6	243.26	371.7	28.25	61.72	0	39.54	0	157.62	153.89	13.18
Chr07_19228	0	0	0	0	0	30.86	0	39.54	0	0	10.2867	13.18
Chr06_16917	0	0	0	0	0	0	0	39.54	0	0	0	13.18
Chr06_15088	0	45.92	0	0	0	0	0	39.54	0	15.3067	0	13.18
Chr06_15087	0	45.92	0	0	0	0	0	39.54	0	15.3067	0	13.18
Chr06_14832	0	0	0	53.1	28.25	30.86	0	39.54	0	0	37.4033	13.18
Chr06_14831	0	0	0	53.1	28.25	30.86	0	39.54	0	0	37.4033	13.18
Chr04_9953	0	45.92	364.9	53.1	0	30.86	0	39.54	0	136.94	27.9867	13.18
Chr03_9789	0	0	0	0	141.25	92.58	0	39.54	0	0	77.9433	13.18
Chr03_9342	0	0	0	0	0	0	0	39.54	0	0	0	13.18
Chr02_4079	0	0	0	0	0	0	0	39.54	0	0	0	13.18
Chr02_4029	0	0	0	0	0	0	0	39.54	0	0	0	13.18
Chr02_3521	0	0	0	26.55	56.5	61.72	0	39.54	0	0	48.2567	13.18
Chr01_1080	0	0	0	53.1	0	0	0	39.54	0	0	17.7	13.18
Chr06_14140	63386.5	36690.1	36611.3	126961	143289	111903	38.07	0	0	45562.7	127385	12.69
Chr02_5138	154.6	0	0	26.55	0	92.58	38.07	0	0	51.5333	39.71	12.69
Chr02_4832	154.6	1836.8	0	26.55	226.01	61.72	38.07	0	0	663.8	104.76	12.69
Chr02_4831	154.6	1836.8	0	26.55	226.01	61.72	38.07	0	0	663.8	104.76	12.69
Chr16_38122	77.3	45.92	0	0	28.25	61.72	38.07	0	0	41.0733	29.99	12.69
Chr06_16215	77.3	0	0	0	0	0	38.07	0	0	25.7667	0	12.69
Chr02_6004	38.65	0	0	0	0	61.72	38.07	0	0	12.8833	20.5733	12.69
ChrX_42125	0	0	0	0	0	0	38.07	0	0	0	0	12.69
Chr18_40574	0	0	0	0	0	0	38.07	0	0	0	0	12.69
Chr18_40390	0	183.68	1702.85	0	0	0	38.07	0	0	628.843	0	12.69
Chr15_35412	0	0	0	0	0	0	38.07	0	0	0	0	12.69
Chr14_33130	0	0	121.63	0	0	61.72	38.07	0	0	40.5433	20.5733	12.69
Chr14_32535	0	0	0	0	0	0	38.07	0	0	0	0	12.69
Chr12_27993	0	0	0	0	0	0	38.07	0	0	0	0	12.69
Chr12_27425	0	0	0	159.3	197.76	308.61	38.07	0	0	0	221.89	12.69
Chr11_25933	0	0	0	53.1	0	61.72	38.07	0	0	0	38.2733	12.69
Chr09_23716	0	45.92	60.82	53.1	141.25	30.86	38.07	0	0	35.58	75.07	12.69
Chr06_16404	0	0	0	0	0	0	38.07	0	0	0	0	12.69
Chr06_14057	0	0	0	0	0	0	38.07	0	0	0	0	12.69
Chr04_11833	0	0	0	0	0	0	38.07	0	0	0	0	12.69
Chr04_10781	0	0	0	0	0	30.86	38.07	0	0	0	10.2867	12.69
Chr03_9387	0	45.92	0	0	0	0	38.07	0	0	15.3067	0	12.69
Chr03_8605	0	0	0	0	0	0	38.07	0	0	0	0	12.69
Chr02_7222	0	0	0	79.65	0	30.86	38.07	0	0	0	36.8367	12.69
Chr02_7161	0	0	0	0	0	0	38.07	0	0	0	0	12.69
Chr02_4255	0	0	60.82	0	0	30.86	38.07	0	0	20.2733	10.2867	12.69
Chr02_4251	0	0	60.82	0	0	30.86	38.07	0	0	20.2733	10.2867	12.69
ssc-miR-10390	0.39	0.43	0.14	2.54	1.6	1.85	3.48	33.46	0.99	0.32	1.99667	12.6433
ssc-miR-135	25.54	33.64	40.67	35.37	56.51	42.29	11.8	12.63	12.72	33.2833	44.7233	12.3833
ssc-miR-7137-5p	2.93	3.53	2.95	3.65	5	3.4	15.28	8.88	11.23	3.13667	4.01667	11.7967
ssc-miR-9841-3p	1.39	2.41	2.52	2.1	1.7	4.48	11.41	10.58	12.32	2.10667	2.76	11.4367
ssc-miR-10386	1.7	6.62	61.85	7.29	4.9	17.75	14.9	15.02	3.58	23.39	9.98	11.1667
ssc-miR-210	8.64	6.37	8.55	10.5	7.88	8.8	9.29	10.41	11.32	7.85333	9.06	10.34
ssc-miR-345-5p	0.85	2.41	2.38	2.43	2.34	5.87	10.83	10.41	9.74	1.88	3.54667	10.3267
ssc-miR-582-3p	5.63	7.4	3.79	6.52	7.77	7.1	9.09	13.31	8.44	5.60667	7.13	10.28
ssc-miR-671-3p	1.31	1.55	3.37	4.53	2.77	4.01	10.06	11.95	8.74	2.07667	3.77	10.25
ssc-miR-652	0.69	0.09	1.68	2.21	1.81	1.39	3.1	15.02	12.32	0.82	1.80333	10.1467
ssc-miR-4331-5p	29.71	1.12	2.24	22.99	22.99	19.6	10.45	4.44	15.5	11.0233	21.86	10.13
ssc-miR-30c-1-3p	3.16	3.61	3.79	3.43	6.17	7.41	9.48	8.02	10.83	3.52	5.67	9.44333
ssc-miR-212	1.39	1.2	2.66	2.98	1.06	1.7	10.25	5.8	9.74	1.75	1.91333	8.59667
ssc-miR-7139-5p	1.39	1.29	3.93	3.65	3.3	5.09	7.54	7	11.13	2.20333	4.01333	8.55667
ssc-miR-545-5p	6.41	7.23	5.19	5.53	5.11	4.01	5.42	10.41	7.85	6.27667	4.88333	7.89333
Chr14_33323	270.55	137.76	486.53	132.75	254.26	30.86	0	0	21.29	298.28	139.29	7.09667
Chr04_10255	193.25	229.6	182.45	265.5	226.01	216.03	0	0	21.29	201.767	235.847	7.09667
Chr14_32032	77.3	0	0	0	0	0	0	0	21.29	25.7667	0	7.09667
Chr04_11692	77.3	45.92	60.82	79.65	113	30.86	0	0	21.29	61.3467	74.5033	7.09667
Chr02_4353	77.3	0	0	132.75	169.51	30.86	0	0	21.29	25.7667	111.04	7.09667
Chr15_34608	38.65	45.92	60.82	0	56.5	61.72	0	0	21.29	48.4633	39.4067	7.09667
Chr09_24226	38.65	0	0	0	0	61.72	0	0	21.29	12.8833	20.5733	7.09667
Chr02_4707	38.65	0	60.82	0	84.75	0	0	0	21.29	33.1567	28.25	7.09667
Chr02_3496	38.65	0	0	0	0	0	0	0	21.29	12.8833	0	7.09667
Chr18_40380	0	0	0	26.55	28.25	0	0	0	21.29	0	18.2667	7.09667
Chr14_33709	0	0	0	0	0	61.72	0	0	21.29	0	20.5733	7.09667
Chr12_27337	0	0	0	0	0	0	0	0	21.29	0	0	7.09667
Chr12_26937	0	0	0	0	0	30.86	0	0	21.29	0	10.2867	7.09667
Chr11_26296	0	0	60.82	0	28.25	0	0	0	21.29	20.2733	9.41667	7.09667
Chr08_20494	0	0	0	0	0	0	0	0	21.29	0	0	7.09667
Chr06_14999	0	0	60.82	106.2	0	0	0	0	21.29	20.2733	35.4	7.09667
Chr05_13503	0	0	0	0	0	0	0	0	21.29	0	0	7.09667
Chr05_13102	0	0	0	0	113	0	0	0	21.29	0	37.6667	7.09667
Chr05_12253	0	0	0	0	0	0	0	0	21.29	0	0	7.09667
Chr04_11570	0	0	60.82	0	28.25	0	0	0	21.29	20.2733	9.41667	7.09667
Chr03_9656	0	0	0	0	56.5	0	0	0	21.29	0	18.8333	7.09667
Chr03_7471	0	0	0	0	0	0	0	0	21.29	0	0	7.09667
Chr02_6676	0	0	0	0	56.5	0	0	0	21.29	0	18.8333	7.09667
Chr02_6045	0	183.68	0	0	0	0	0	0	21.29	61.2267	0	7.09667
Chr02_3884	0	0	0	0	0	0	0	0	21.29	0	0	7.09667
Chr01_591	0	0	0	79.65	0	0	0	0	21.29	0	26.55	7.09667
Chr01_589	0	0	0	79.65	0	0	0	0	21.29	0	26.55	7.09667
ssc-miR-31	2.39	1.46	1.96	3.98	3.09	5.09	4.26	11.78	3.48	1.93667	4.05333	6.50667
ssc-miR-20a-3p	7.72	14.71	7.99	15.92	12.67	17.13	6.58	7	5.27	10.14	15.24	6.28333
ssc-miR-4332	8.33	4.39	25.8	18.35	11.6	20.37	6.96	7.17	3.68	12.84	16.7733	5.93667
ssc-miR-1839-5p	2.7	3.53	3.93	4.09	2.13	1.85	7.35	3.76	6.46	3.38667	2.69	5.85667
ssc-miR-183	14.05	11.7	11.92	23.76	15.11	23.92	2.9	5.97	6.85	12.5567	20.93	5.24
ssc-miR-217	0.69	1.2	0.84	0.99	1.6	0.62	7.16	3.58	4.97	0.91	1.07	5.23667
ssc-miR-33b-5p	3.01	1.46	2.1	5.08	2.87	6.02	6.38	4.44	4.17	2.19	4.65667	4.99667
ssc-miR-499-3p	0.46	0.77	0.7	8.4	9.79	11.88	3.68	6.66	4.47	0.643333	10.0233	4.93667
ssc-miR-129a-3p	0.85	1.63	2.1	2.32	2.34	3.55	6.19	4.44	3.68	1.52667	2.73667	4.77
ssc-miR-885-5p	154.5	116.92	188.21	167	179.55	246.64	3.1	4.27	6.36	153.21	197.73	4.57667
ssc-miR-376a-5p	0	0	0	0.11	0.43	0.15	2.9	5.97	4.57	0	0.23	4.48
ssc-miR-7144-5p	0.85	0.52	1.26	2.1	0.53	1.08	4.84	4.44	3.58	0.876667	1.23667	4.28667
ssc-miR-339-3p	2.39	1.63	2.66	2.98	3.62	3.55	4.45	3.93	4.37	2.22667	3.38333	4.25
ssc-miR-490-3p	1.39	2.41	1.26	1.33	2.02	0.93	4.06	4.1	4.37	1.68667	1.42667	4.17667
ssc-miR-490	1.39	2.41	1.26	1.33	2.02	0.93	4.06	4.1	4.37	1.68667	1.42667	4.17667
ssc-miR-1277	1.62	0.26	0.14	2.76	2.24	1.39	6	2.39	2.88	0.673333	2.13	3.75667
ssc-miR-216	0.08	0.43	0.56	1.11	0.96	1.54	3.48	3.24	4.47	0.356667	1.20333	3.73
ssc-miR-205	0.31	0.43	1.96	1.77	2.02	0.62	1.74	8.19	1.09	0.9	1.47	3.67333
ssc-miR-18b	1.47	0.77	0.42	3.09	0.85	0.46	3.87	2.56	3.97	0.886667	1.46667	3.46667
ssc-miR-141	38.97	42.24	47.54	70.51	64.07	63.9	2.9	6.32	0.99	42.9167	66.16	3.40333
ssc-miR-769-3p	0.85	0.69	1.4	0.44	0.85	0.62	4.64	2.9	2.48	0.98	0.636667	3.34
ssc-miR-9851-3p	0.77	0.26	1.4	2.98	4.26	3.55	3.29	3.76	2.48	0.81	3.59667	3.17667
ssc-miR-137	0.39	1.46	0.42	0.66	0.96	0.77	2.32	4.1	2.19	0.756667	0.796667	2.87
ssc-miR-10391	3.55	6.11	0.84	1.99	3.09	3.4	2.51	3.41	2.58	3.5	2.82667	2.83333
ssc-miR-381-5p	0	0	0	0	0	0	2.32	2.9	2.48	0	0	2.56667
ssc-miR-376c	0	0	0.14	0	0.11	0	1.93	3.93	1.39	0.046667	0.036667	2.41667
ssc-miR-200b	217.55	225.06	276.28	150.64	221.48	159.28	1.35	3.76	1.19	239.63	177.133	2.1
ssc-miR-490-5p	0.08	0.09	0.14	0.11	0.43	0.46	1.74	2.56	1.99	0.103333	0.333333	2.09667
ssc-miR-7136-5p	1.08	1.38	0.14	2.32	3.41	2.47	1.74	1.54	2.88	0.866667	2.73333	2.05333
ssc-miR-2411	0.93	0.34	0.84	1.88	0.85	0.77	1.55	1.88	2.48	0.703333	1.16667	1.97
ssc-miR-133a-5p	0.93	1.2	2.24	1.11	0.21	0.46	2.51	1.02	2.38	1.45667	0.593333	1.97
ssc-miR-1271-3p	0.23	0.09	0.98	4.31	2.02	8.03	1.16	2.05	2.58	0.433333	4.78667	1.93
ssc-miR-7137-3p	0.69	0.26	0.28	0.66	0.75	0.77	4.26	0.85	0.6	0.41	0.726667	1.90333
ssc-miR-29a-5p	8.72	9.29	10.66	11.05	10.86	12.19	0.97	2.22	2.38	9.55667	11.3667	1.85667
ssc-miR-487b	0	0	0	0	0	0	0.97	2.9	1.39	0	0	1.75333
ssc-miR-9860-5p	1.08	0.69	0.28	1.11	1.28	0.46	0.97	1.54	2.28	0.683333	0.95	1.59667
ssc-miR-133b	1.31	1.89	3.65	2.54	1.7	0.77	0.77	0.85	3.08	2.28333	1.67	1.56667
ssc-miR-9788-3p	0.46	0.43	0.56	0.99	0.43	0	2.71	0.51	1.19	0.483333	0.473333	1.47
ssc-miR-96-5p	8.72	6.71	6.87	16.47	10	20.99	0.97	2.39	0.99	7.43333	15.82	1.45
ssc-miR-7857-3p	0.15	0	0.84	0.22	0.11	0	2.51	1.19	0.6	0.33	0.11	1.43333
ssc-miR-215	490.74	360.05	443.59	765.8	681.9	758.9	1.74	1.19	1.09	431.46	735.533	1.34
ssc-miR-33b-3p	0.54	0	0.42	0.66	0.32	0.15	0.97	1.54	1.49	0.32	0.376667	1.33333
ssc-miR-4331-3p	2.32	1.2	1.4	2.87	1.92	2.78	1.55	1.54	0.79	1.64	2.52333	1.29333
ssc-miR-2366	0.15	0	0.14	0.11	0.11	0	2.13	1.54	0.2	0.096667	0.073333	1.29
ssc-miR-122-3p	1027.71	734.12	1968.47	2166.23	1603.27	2531.52	1.55	1.37	0.79	1243.43	2100.34	1.23667
ssc-miR-551a	0.08	0.26	0.14	0.22	0.43	1.23	0.39	1.54	1.19	0.16	0.626667	1.04
ssc-miR-1388	1.85	2.32	2.38	2.21	3.19	1.39	1.35	0.85	0.79	2.18333	2.26333	0.996667
ssc-miR-676-5p	0.08	0.17	0.14	0	0.11	0	0.58	0.51	1.79	0.13	0.036667	0.96
ssc-miR-105-1	0.46	1.03	1.82	0.77	0.64	0.15	0.58	1.54	0.5	1.10333	0.52	0.873333
ssc-miR-421-5p	0.08	0.09	0	0.22	0	0	0.97	1.54	0.1	0.056667	0.073333	0.87
ssc-miR-219a	0.46	0.6	0.28	0.77	1.06	0.31	0.58	1.19	0.79	0.446667	0.713333	0.853333
ssc-miR-9810-3p	0.08	0.09	0.14	0.22	0.21	0.15	0.58	1.02	0.89	0.103333	0.193333	0.83
ssc-miR-190b	0.62	0.6	0.14	0.22	0.43	0.46	0	1.88	0.5	0.453333	0.37	0.793333
ssc-miR-186-3p	0.85	0.43	0.84	1.77	0.64	1.39	0.97	0.85	0.5	0.706667	1.26667	0.773333
ssc-miR-9858-5p	0.46	0.34	0.84	1.22	1.92	1.23	0.39	1.19	0.6	0.546667	1.45667	0.726667
ssc-miR-124a	0.23	0.6	0	1.11	0.11	0	0.19	1.19	0.7	0.276667	0.406667	0.693333
ssc-miR-935	0.08	0.17	0.28	0	0	0	1.35	0	0.7	0.176667	0	0.683333
ssc-miR-155-3p	0	0	0.14	0.11	0	0.62	0.39	0.85	0.79	0.046667	0.243333	0.676667
ssc-miR-1839-3p	0.08	0.09	0.14	0.99	0.43	0.93	0	0.85	0.79	0.103333	0.783333	0.546667
ssc-miR-10382	0.62	1.2	0.84	3.43	3.3	1.23	0.19	0.68	0.7	0.886667	2.65333	0.523333
ssc-miR-194b-5p	45.53	46.03	39.27	70.73	63.01	65.9	0	1.02	0.5	43.61	66.5467	0.506667
ssc-miR-34c	1.85	1.46	0.28	0.77	0.75	0.31	0.39	0.34	0.7	1.19667	0.61	0.476667
ssc-miR-194a-3p	102.64	86.12	79.38	223.81	223.72	217.93	0.19	0.34	0.89	89.38	221.82	0.473333
ssc-miR-153	0.08	0.52	0	1.33	0.53	0.77	0.97	0.34	0.1	0.2	0.876667	0.47
ssc-miR-202-5p	0	0.17	0.14	0.11	0	0	0	0.34	0.99	0.103333	0.036667	0.443333
ssc-miR-375	106.65	353.08	109.81	329.8	212.54	372.74	0.58	0.51	0.1	189.847	305.027	0.396667
ssc-miR-670	0	0.26	0.14	0	0.11	0.15	0.58	0.34	0.2	0.133333	0.086667	0.373333
ssc-miR-6782-3p	1.85	0.95	0.84	4.42	2.34	0	0.39	0.51	0.2	1.21333	2.25333	0.366667
ssc-miR-7143-3p	0.23	0.09	0	0	0	0	0.19	0.17	0.6	0.106667	0	0.32
ssc-miR-371-5p	0	0.09	0	0	0	0	0.39	0.34	0.2	0.03	0	0.31
ssc-miR-383	0	0	0	0	0.11	0	0	0.51	0.3	0	0.036667	0.27
ssc-miR-7135-5p	0	0	0	0	0	0	0.77	0	0	0	0	0.256667
ssc-miR-7136-3p	0.39	0.34	0.14	0.55	1.7	0.62	0.19	0	0.5	0.29	0.956667	0.23
ssc-miR-7135-3p	0.15	0	0.14	0	0	0.15	0.58	0	0.1	0.096667	0.05	0.226667
ssc-miR-7139-3p	0.15	0	0	0	0.32	0.15	0	0.34	0.3	0.05	0.156667	0.213333
ssc-miR-4338	0.23	0.34	0.7	0.33	0.11	0	0.39	0	0.2	0.423333	0.146667	0.196667
ssc-miR-138	1.31	0.95	1.4	1.55	1.7	2.01	0	0.17	0.4	1.22	1.75333	0.19
ssc-miR-187	0.15	0.09	0.28	0.33	0.11	0	0.39	0.17	0	0.173333	0.146667	0.186667
ssc-miR-7142-5p	0	0.17	0	0.11	0	0.31	0	0	0.5	0.056667	0.14	0.166667
ssc-miR-7141-5p	0	0	0	0	0	0	0	0	0.5	0	0	0.166667
ssc-miR-325	0	0	0.14	0	0	0	0	0	0.5	0.046667	0	0.166667
ssc-miR-429	23.23	26.76	26.93	27.3	32.35	27.47	0.19	0	0.3	25.64	29.04	0.163333
ssc-miR-7138-5p	1.54	0.86	1.82	4.42	2.77	4.48	0	0	0.4	1.40667	3.89	0.133333
ssc-miR-9820-5p	0.15	0	0	0	0.11	0	0.19	0.17	0	0.05	0.036667	0.12
ssc-miR-885-3p	5.32	1.98	3.51	6.52	4.79	3.24	0	0	0.2	3.60333	4.85	0.066667
ssc-miR-9785-5p	0	0	0.42	0	0	0.15	0	0	0.2	0.14	0.05	0.066667
ssc-miR-7143-5p	0	0	0	0	0	0	0	0.17	0	0	0	0.056667
ssc-miR-432-3p	0	0	0	0	0	0	0	0.17	0	0	0	0.056667
ssc-miR-489	0	0	0	0	0	0	0	0	0.1	0	0	0.033333
ssc-miR-196b-3p	0	0	0	0	0	0	0	0	0.1	0	0	0.033333
Chr14_33005	1739.26	826.56	2189.38	3159.43	3644.38	2222.02	0	0	0	1585.07	3008.61	0
Chr14_34118	463.8	137.76	304.08	26.55	28.25	0	0	0	0	301.88	18.2667	0
Chr05_13370	270.55	45.92	121.63	26.55	282.51	92.58	0	0	0	146.033	133.88	0
Chr04_11721	270.55	0	608.16	79.65	84.75	61.72	0	0	0	292.903	75.3733	0
Chr04_11719	270.55	0	608.16	79.65	84.75	61.72	0	0	0	292.903	75.3733	0
Chr07_19612	231.9	137.76	182.45	292.05	56.5	61.72	0	0	0	184.037	136.757	0
Chr05_12713	231.9	137.76	304.08	159.3	84.75	30.86	0	0	0	224.58	91.6367	0
Chr05_12593	193.25	45.92	0	26.55	0	0	0	0	0	79.7233	8.85	0
Chr05_12591	193.25	45.92	0	26.55	0	0	0	0	0	79.7233	8.85	0
Chr01_786	193.25	45.92	0	0	0	123.45	0	0	0	79.7233	41.15	0
Chr01_2585	193.25	137.76	0	0	113	216.03	0	0	0	110.337	109.677	0
Chr15_35729	154.6	91.84	60.82	0	0	0	0	0	0	102.42	0	0
Chr14_32739	115.95	183.68	121.63	132.75	0	0	0	0	0	140.42	44.25	0
Chr07_19084	115.95	0	243.26	26.55	113	216.03	0	0	0	119.737	118.527	0
Chr05_12178	115.95	0	121.63	0	0	92.58	0	0	0	79.1933	30.86	0
Chr03_9801	115.95	45.92	0	0	0	0	0	0	0	53.9567	0	0
Chr01_554	115.95	321.44	182.45	79.65	113	0	0	0	0	206.613	64.2167	0
ChrX_41806	77.3	45.92	121.63	106.2	56.5	185.17	0	0	0	81.6167	115.957	0
ChrX_41765	77.3	0	0	0	0	0	0	0	0	25.7667	0	0
Chr17_38858	77.3	0	0	0	56.5	0	0	0	0	25.7667	18.8333	0
Chr17_38857	77.3	0	0	0	56.5	0	0	0	0	25.7667	18.8333	0
Chr09_24376	77.3	0	121.63	53.1	28.25	0	0	0	0	66.31	27.1167	0
Chr09_24375	77.3	0	121.63	53.1	28.25	0	0	0	0	66.31	27.1167	0
Chr06_16664	77.3	0	0	0	28.25	0	0	0	0	25.7667	9.41667	0
Chr05_12517	77.3	91.84	60.82	106.2	28.25	61.72	0	0	0	76.6533	65.39	0
Chr04_11302	77.3	0	0	0	28.25	0	0	0	0	25.7667	9.41667	0
Chr02_6311	77.3	0	0	79.65	56.5	92.58	0	0	0	25.7667	76.2433	0
Scaffold416_43536	38.65	0	0	0	0	0	0	0	0	12.8833	0	0
ChrX_42564	38.65	0	0	0	0	0	0	0	0	12.8833	0	0
ChrX_42107	38.65	0	0	0	56.5	0	0	0	0	12.8833	18.8333	0
ChrX_41647	38.65	183.68	0	79.65	56.5	154.31	0	0	0	74.11	96.82	0
Chr18_40306	38.65	0	0	0	56.5	0	0	0	0	12.8833	18.8333	0
Chr15_34537	38.65	229.6	60.82	79.65	0	0	0	0	0	109.69	26.55	0
Chr14_33940	38.65	0	60.82	0	0	0	0	0	0	33.1567	0	0
Chr14_32796	38.65	0	0	0	0	0	0	0	0	12.8833	0	0
Chr12_28101	38.65	0	0	26.55	56.5	0	0	0	0	12.8833	27.6833	0
Chr12_27433	38.65	0	0	132.75	0	0	0	0	0	12.8833	44.25	0
Chr10_24931	38.65	0	0	0	0	0	0	0	0	12.8833	0	0
Chr08_21737	38.65	0	0	53.1	56.5	30.86	0	0	0	12.8833	46.82	0
Chr08_21612	38.65	183.68	60.82	79.65	0	30.86	0	0	0	94.3833	36.8367	0
Chr08_20501	38.65	183.68	60.82	79.65	0	30.86	0	0	0	94.3833	36.8367	0
Chr07_19712	38.65	137.76	0	26.55	56.5	92.58	0	0	0	58.8033	58.5433	0
Chr07_19711	38.65	137.76	0	26.55	56.5	92.58	0	0	0	58.8033	58.5433	0
Chr07_18691	38.65	0	0	26.55	0	0	0	0	0	12.8833	8.85	0
Chr06_16096	38.65	0	0	0	0	0	0	0	0	12.8833	0	0
Chr06_14640	38.65	0	121.63	26.55	0	30.86	0	0	0	53.4267	19.1367	0
Chr06_14099	38.65	0	0	0	0	0	0	0	0	12.8833	0	0
Chr05_11902	38.65	0	0	26.55	0	0	0	0	0	12.8833	8.85	0
Chr04_11365	38.65	91.84	0	0	0	61.72	0	0	0	43.4967	20.5733	0
Chr04_10381	38.65	0	182.45	0	0	0	0	0	0	73.7	0	0
Chr03_7920	38.65	91.84	243.26	0	56.5	30.86	0	0	0	124.583	29.12	0
Chr02_6354	38.65	0	0	0	0	0	0	0	0	12.8833	0	0
Chr02_4269	38.65	45.92	60.82	0	0	0	0	0	0	48.4633	0	0
ssc-miR-802	25.16	54.37	52.45	309.9	100.47	594.53	0	0	0	43.9933	334.967	0
ssc-miR-10389	2.01	2.15	1.96	2.32	2.02	2.47	0	0	0	2.04	2.27	0
ssc-miR-10387	1.47	1.63	8.13	2.65	2.55	4.17	0	0	0	3.74333	3.12333	0
ssc-miR-7140-3p	0.15	0.95	0	0.11	0.32	0.15	0	0	0	0.366667	0.193333	0
ssc-miR-181d-3p	0.15	0	0	0	0.11	0	0	0	0	0.05	0.036667	0
ssc-miR-9856-3p	0.08	0.09	0	0	0	0	0	0	0	0.056667	0	0
ssc-miR-219b-3p	0.08	0.69	0.84	1.44	1.49	2.62	0	0	0	0.536667	1.85	0
ssc-miR-105-2	0.08	0.09	0	0	0	0.46	0	0	0	0.056667	0.153333	0
ssc-miR-9828-3p	0	0	0	0	0	0	0	0	0	0	0	0
ssc-miR-9811-5p	0	0	0	0	0	0	0	0	0	0	0	0
ssc-miR-92b-5p	0	0	0	0.22	0.43	0	0	0	0	0	0.216667	0
ssc-miR-7144-3p	0	0	0	0	0	0	0	0	0	0	0	0
ssc-miR-7140-5p	0	0.26	0	0	0.21	0	0	0	0	0.086667	0.07	0
ssc-miR-7138-3p	0	0	0.14	0.66	0	0	0	0	0	0.046667	0.22	0
ssc-miR-4337	0	0	0	0	0	0	0	0	0	0	0	0
ssc-miR-376b	0	0	0	0	0	0	0	0	0	0	0	0
ssc-miR-218-3p	0	0	0	0	0	0	0	0	0	0	0	0
ssc-miR-208b	0	0	0	0	0	0	0	0	0	0	0	0
ssc-miR-202-3p	0	0	0	0	0	0	0	0	0	0	0	0
ssc-miR-194b-3p	0	0	0	0	0	0	0	0	0	0	0	0
ssc-miR-146a-3p	0	0	0	0	0	0	0	0	0	0	0	0
ssc-miR-1224	0	0	0	0	0	0	0	0	0	0	0	0
Scaffold882_43792	0	0	0	0	0	0	0	0	0	0	0	0
Scaffold846_43766	0	0	0	79.65	0	0	0	0	0	0	26.55	0
Scaffold532_43703	0	0	0	0	0	30.86	0	0	0	0	10.2867	0
Scaffold532_43699	0	0	0	0	0	0	0	0	0	0	0	0
Scaffold4344_44354	0	0	0	79.65	0	61.72	0	0	0	0	47.1233	0
Scaffold4211_44336	0	0	0	0	0	0	0	0	0	0	0	0
Scaffold355_43491	0	0	0	0	0	0	0	0	0	0	0	0
Scaffold276_43387	0	0	0	0	0	0	0	0	0	0	0	0
Scaffold268_43327	0	45.92	0	0	0	0	0	0	0	15.3067	0	0
Scaffold1266_43883	0	0	0	0	0	0	0	0	0	0	0	0
ChrX_42490	0	0	0	0	0	0	0	0	0	0	0	0
ChrX_42472	0	45.92	0	132.75	84.75	92.58	0	0	0	15.3067	103.36	0
ChrX_42065	0	0	0	0	0	0	0	0	0	0	0	0
ChrX_41818	0	0	0	0	0	0	0	0	0	0	0	0
ChrX_41817	0	0	0	0	0	0	0	0	0	0	0	0
ChrX_41569	0	45.92	0	0	141.25	0	0	0	0	15.3067	47.0833	0
ChrX_41541	0	321.44	60.82	0	0	0	0	0	0	127.42	0	0
ChrX_40996	0	0	0	0	0	0	0	0	0	0	0	0
ChrX_40995	0	0	0	0	0	0	0	0	0	0	0	0
ChrX_40990	0	0	0	0	0	0	0	0	0	0	0	0
ChrX_40989	0	0	0	0	0	0	0	0	0	0	0	0
Chr18_40619	0	45.92	0	26.55	56.5	0	0	0	0	15.3067	27.6833	0
Chr18_40504	0	0	0	0	0	0	0	0	0	0	0	0
Chr17_39645	0	0	0	0	113	0	0	0	0	0	37.6667	0
Chr17_39622	0	45.92	0	79.65	28.25	30.86	0	0	0	15.3067	46.2533	0
Chr17_39409	0	0	0	0	0	0	0	0	0	0	0	0
Chr17_39151	0	0	0	0	0	0	0	0	0	0	0	0
Chr17_39129	0	0	0	0	0	0	0	0	0	0	0	0
Chr17_39116	0	0	0	53.1	0	0	0	0	0	0	17.7	0
Chr17_39105	0	0	0	0	0	0	0	0	0	0	0	0
Chr17_39079	0	0	0	0	0	0	0	0	0	0	0	0
Chr17_39075	0	0	0	0	0	0	0	0	0	0	0	0
Chr16_38697	0	0	0	0	0	0	0	0	0	0	0	0
Chr16_38657	0	0	0	0	0	0	0	0	0	0	0	0
Chr16_37779	0	0	60.82	0	0	0	0	0	0	20.2733	0	0
Chr15_37534	0	0	0	0	0	0	0	0	0	0	0	0
Chr15_37401	0	0	0	0	0	0	0	0	0	0	0	0
Chr15_37266	0	0	0	0	56.5	30.86	0	0	0	0	29.12	0
Chr15_35978	0	0	0	0	0	0	0	0	0	0	0	0
Chr15_35930	0	0	0	0	56.5	0	0	0	0	0	18.8333	0
Chr15_35758	0	0	0	0	0	0	0	0	0	0	0	0
Chr15_35585	0	0	0	0	0	0	0	0	0	0	0	0
Chr15_35524	0	0	0	0	56.5	0	0	0	0	0	18.8333	0
Chr15_35001	0	0	60.82	26.55	0	0	0	0	0	20.2733	8.85	0
Chr15_34941	0	0	0	0	0	0	0	0	0	0	0	0
Chr14_33891	0	0	0	0	0	0	0	0	0	0	0	0
Chr14_33860	0	0	0	0	0	0	0	0	0	0	0	0
Chr14_33786	0	0	0	26.55	56.5	0	0	0	0	0	27.6833	0
Chr14_33534	0	0	0	0	0	0	0	0	0	0	0	0
Chr14_33482	0	0	0	53.1	0	0	0	0	0	0	17.7	0
Chr14_33346	0	0	0	0	0	0	0	0	0	0	0	0
Chr14_33310	0	0	60.82	53.1	28.25	0	0	0	0	20.2733	27.1167	0
Chr14_32761	0	0	0	0	0	0	0	0	0	0	0	0
Chr14_32641	0	0	0	26.55	0	30.86	0	0	0	0	19.1367	0
Chr14_32457	0	0	0	0	0	0	0	0	0	0	0	0
Chr14_32399	0	0	0	0	0	0	0	0	0	0	0	0
Chr14_32126	0	0	60.82	0	28.25	0	0	0	0	20.2733	9.41667	0
Chr14_31925	0	0	0	0	0	0	0	0	0	0	0	0
Chr13_31430	0	0	0	0	0	0	0	0	0	0	0	0
Chr13_31314	0	0	0	0	0	0	0	0	0	0	0	0
Chr13_31264	0	0	0	0	0	0	0	0	0	0	0	0
Chr13_31017	0	0	0	0	28.25	0	0	0	0	0	9.41667	0
Chr13_30924	0	0	0	0	0	0	0	0	0	0	0	0
Chr13_30859	0	0	0	0	0	0	0	0	0	0	0	0
Chr13_30625	0	0	0	0	0	0	0	0	0	0	0	0
Chr13_30499	0	0	0	53.1	0	0	0	0	0	0	17.7	0
Chr13_29969	0	0	0	0	0	0	0	0	0	0	0	0
Chr13_29937	0	0	0	0	0	0	0	0	0	0	0	0
Chr13_29538	0	0	0	185.85	56.5	0	0	0	0	0	80.7833	0
Chr13_29364	0	0	0	26.55	0	0	0	0	0	0	8.85	0
Chr13_29231	0	0	60.82	53.1	56.5	0	0	0	0	20.2733	36.5333	0
Chr13_29178	0	0	0	0	0	0	0	0	0	0	0	0
Chr13_29128	0	0	0	0	0	0	0	0	0	0	0	0
Chr13_29127	0	0	0	0	0	0	0	0	0	0	0	0
Chr12_28391	0	0	0	0	0	0	0	0	0	0	0	0
Chr12_28118	0	0	0	0	0	0	0	0	0	0	0	0
Chr12_28117	0	0	0	0	0	0	0	0	0	0	0	0
Chr12_27721	0	0	0	0	0	0	0	0	0	0	0	0
Chr12_27703	0	0	0	0	0	0	0	0	0	0	0	0
Chr12_27553	0	0	0	0	0	30.86	0	0	0	0	10.2867	0
Chr12_27292	0	0	0	26.55	0	30.86	0	0	0	0	19.1367	0
Chr12_26940	0	0	0	0	0	0	0	0	0	0	0	0
Chr12_26931	0	0	0	0	0	0	0	0	0	0	0	0
Chr12_26904	0	0	0	0	0	0	0	0	0	0	0	0
Chr12_26868	0	45.92	0	0	0	0	0	0	0	15.3067	0	0
Chr12_26859	0	0	0	0	28.25	0	0	0	0	0	9.41667	0
Chr11_26515	0	0	0	0	28.25	0	0	0	0	0	9.41667	0
Chr11_26360	0	0	60.82	26.55	56.5	61.72	0	0	0	20.2733	48.2567	0
Chr11_25908	0	0	60.82	0	28.25	61.72	0	0	0	20.2733	29.99	0
Chr11_25904	0	0	0	0	0	0	0	0	0	0	0	0
Chr10_25734	0	0	0	0	0	0	0	0	0	0	0	0
Chr10_25572	0	0	0	0	197.76	123.45	0	0	0	0	107.07	0
Chr10_25566	0	0	0	0	0	0	0	0	0	0	0	0
Chr10_25481	0	0	0	0	0	30.86	0	0	0	0	10.2867	0
Chr10_25428	0	0	0	26.55	0	0	0	0	0	0	8.85	0
Chr10_25408	0	0	0	0	0	0	0	0	0	0	0	0
Chr10_25189	0	0	0	0	0	123.45	0	0	0	0	41.15	0
Chr10_24911	0	0	0	0	0	0	0	0	0	0	0	0
Chr10_24604	0	0	0	0	0	0	0	0	0	0	0	0
Chr10_24539	0	0	0	26.55	0	0	0	0	0	0	8.85	0
Chr10_24478	0	0	0	0	0	0	0	0	0	0	0	0
Chr09_24403	0	0	0	0	0	0	0	0	0	0	0	0
Chr09_24033	0	0	0	0	56.5	0	0	0	0	0	18.8333	0
Chr09_23603	0	0	0	106.2	0	0	0	0	0	0	35.4	0
Chr09_23564	0	0	0	0	0	0	0	0	0	0	0	0
Chr09_23419	0	0	0	0	0	216.03	0	0	0	0	72.01	0
Chr09_23263	0	0	0	0	0	0	0	0	0	0	0	0
Chr09_23231	0	91.84	0	0	113	0	0	0	0	30.6133	37.6667	0
Chr09_23230	0	0	0	0	0	0	0	0	0	0	0	0
Chr09_23169	0	0	0	0	0	0	0	0	0	0	0	0
Chr09_22492	0	0	0	0	0	0	0	0	0	0	0	0
Chr09_22246	0	0	0	0	0	0	0	0	0	0	0	0
Chr09_22245	0	0	0	0	0	0	0	0	0	0	0	0
Chr08_21898	0	0	0	159.3	84.75	0	0	0	0	0	81.35	0
Chr08_21519	0	0	0	0	0	0	0	0	0	0	0	0
Chr08_21314	0	0	0	0	0	0	0	0	0	0	0	0
Chr08_21313	0	0	0	0	0	0	0	0	0	0	0	0
Chr08_21296	0	91.84	0	106.2	0	30.86	0	0	0	30.6133	45.6867	0
Chr08_21277	0	0	0	0	0	0	0	0	0	0	0	0
Chr08_21225	0	0	121.63	0	0	0	0	0	0	40.5433	0	0
Chr08_21212	0	0	0	0	0	0	0	0	0	0	0	0
Chr08_20312	0	0	0	0	0	0	0	0	0	0	0	0
Chr07_19826	0	0	0	0	0	0	0	0	0	0	0	0
Chr07_19820	0	0	0	0	0	0	0	0	0	0	0	0
Chr07_19806	0	0	0	0	0	0	0	0	0	0	0	0
Chr07_19757	0	0	243.26	0	0	0	0	0	0	81.0867	0	0
Chr07_19535	0	0	0	0	0	0	0	0	0	0	0	0
Chr07_19304	0	0	0	0	0	0	0	0	0	0	0	0
Chr07_18816	0	0	0	0	0	0	0	0	0	0	0	0
Chr07_18811	0	0	0	0	0	30.86	0	0	0	0	10.2867	0
Chr07_18718	0	0	0	0	0	0	0	0	0	0	0	0
Chr07_18146	0	0	0	53.1	0	0	0	0	0	0	17.7	0
Chr07_18066	0	0	0	0	56.5	0	0	0	0	0	18.8333	0
Chr07_17669	0	0	0	0	0	0	0	0	0	0	0	0
Chr07_17419	0	0	0	0	0	216.03	0	0	0	0	72.01	0
Chr07_17351	0	0	0	0	0	0	0	0	0	0	0	0
Chr06_17145	0	0	0	0	0	0	0	0	0	0	0	0
Chr06_16596	0	0	0	0	28.25	61.72	0	0	0	0	29.99	0
Chr06_16595	0	0	0	0	28.25	61.72	0	0	0	0	29.99	0
Chr06_16438	0	0	0	0	0	30.86	0	0	0	0	10.2867	0
Chr06_16399	0	0	0	0	0	0	0	0	0	0	0	0
Chr06_15877	0	45.92	0	0	0	0	0	0	0	15.3067	0	0
Chr06_15803	0	0	0	26.55	0	0	0	0	0	0	8.85	0
Chr06_15649	0	0	0	0	0	0	0	0	0	0	0	0
Chr06_15626	0	0	0	0	0	0	0	0	0	0	0	0
Chr06_15617	0	0	0	0	0	0	0	0	0	0	0	0
Chr06_15584	0	0	0	0	0	0	0	0	0	0	0	0
Chr06_15489	0	0	60.82	26.55	0	92.58	0	0	0	20.2733	39.71	0
Chr06_15404	0	0	0	0	0	0	0	0	0	0	0	0
Chr06_15025	0	0	60.82	0	0	30.86	0	0	0	20.2733	10.2867	0
Chr06_15001	0	0	0	0	0	0	0	0	0	0	0	0
Chr06_14957	0	0	0	0	0	0	0	0	0	0	0	0
Chr06_14877	0	0	0	0	0	0	0	0	0	0	0	0
Chr06_14673	0	0	0	0	0	0	0	0	0	0	0	0
Chr06_14584	0	0	0	0	0	0	0	0	0	0	0	0
Chr06_14573	0	0	0	0	0	0	0	0	0	0	0	0
Chr06_14549	0	0	0	0	0	0	0	0	0	0	0	0
Chr06_14007	0	0	0	0	0	0	0	0	0	0	0	0
Chr05_13609	0	0	0	0	0	0	0	0	0	0	0	0
Chr05_13220	0	0	0	0	0	0	0	0	0	0	0	0
Chr05_13028	0	0	0	26.55	0	0	0	0	0	0	8.85	0
Chr05_12564	0	0	0	0	0	0	0	0	0	0	0	0
Chr05_12549	0	0	0	0	0	0	0	0	0	0	0	0
Chr05_12495	0	0	364.9	0	0	0	0	0	0	121.633	0	0
Chr05_12200	0	45.92	60.82	0	0	30.86	0	0	0	35.58	10.2867	0
Chr05_12182	0	45.92	0	0	0	0	0	0	0	15.3067	0	0
Chr05_11922	0	0	0	0	0	0	0	0	0	0	0	0
Chr04_11635	0	0	0	26.55	0	0	0	0	0	0	8.85	0
Chr04_11512	0	0	0	0	0	0	0	0	0	0	0	0
Chr04_11464	0	0	0	0	0	0	0	0	0	0	0	0
Chr04_11238	0	183.68	60.82	0	0	0	0	0	0	81.5	0	0
Chr04_11130	0	0	0	0	0	0	0	0	0	0	0	0
Chr04_11092	0	0	0	0	0	0	0	0	0	0	0	0
Chr04_10863	0	0	0	0	0	0	0	0	0	0	0	0
Chr04_10542	0	0	0	0	0	0	0	0	0	0	0	0
Chr04_10432	0	0	0	0	0	0	0	0	0	0	0	0
Chr03_9645	0	0	0	0	0	0	0	0	0	0	0	0
Chr03_9552	0	45.92	182.45	79.65	28.25	277.75	0	0	0	76.1233	128.55	0
Chr03_9544	0	0	0	0	0	0	0	0	0	0	0	0
Chr03_9351	0	0	0	0	0	0	0	0	0	0	0	0
Chr03_9260	0	0	0	0	0	0	0	0	0	0	0	0
Chr03_8731	0	0	0	0	0	0	0	0	0	0	0	0
Chr03_8622	0	91.84	0	0	0	0	0	0	0	30.6133	0	0
Chr03_8493	0	0	0	0	0	0	0	0	0	0	0	0
Chr03_8450	0	0	0	0	0	0	0	0	0	0	0	0
Chr03_8338	0	0	0	0	0	0	0	0	0	0	0	0
Chr03_8332	0	0	0	0	0	0	0	0	0	0	0	0
Chr03_8205	0	0	0	0	0	0	0	0	0	0	0	0
Chr03_7903	0	0	0	0	0	0	0	0	0	0	0	0
Chr02_7215	0	0	0	53.1	28.25	0	0	0	0	0	27.1167	0
Chr02_7195	0	0	0	0	28.25	61.72	0	0	0	0	29.99	0
Chr02_7093	0	0	0	0	0	0	0	0	0	0	0	0
Chr02_7011	0	0	0	0	0	0	0	0	0	0	0	0
Chr02_6906	0	0	60.82	0	0	0	0	0	0	20.2733	0	0
Chr02_6658	0	0	0	0	0	30.86	0	0	0	0	10.2867	0
Chr02_6600	0	0	0	0	0	0	0	0	0	0	0	0
Chr02_6599	0	0	0	0	0	0	0	0	0	0	0	0
Chr02_6194	0	0	0	0	0	0	0	0	0	0	0	0
Chr02_6120	0	91.84	121.63	0	56.5	0	0	0	0	71.1567	18.8333	0
Chr02_6044	0	0	0	0	169.51	0	0	0	0	0	56.5033	0
Chr02_6033	0	0	0	0	0	0	0	0	0	0	0	0
Chr02_5958	0	0	0	0	0	0	0	0	0	0	0	0
Chr02_5942	0	0	0	0	0	0	0	0	0	0	0	0
Chr02_5933	0	0	0	0	28.25	0	0	0	0	0	9.41667	0
Chr02_5821	0	0	60.82	0	0	30.86	0	0	0	20.2733	10.2867	0
Chr02_5430	0	91.84	60.82	0	0	0	0	0	0	50.8867	0	0
Chr02_5384	0	0	0	0	28.25	0	0	0	0	0	9.41667	0
Chr02_5371	0	0	0	0	0	0	0	0	0	0	0	0
Chr02_5117	0	0	0	0	0	0	0	0	0	0	0	0
Chr02_4930	0	0	60.82	0	0	0	0	0	0	20.2733	0	0
Chr02_4880	0	0	0	0	0	0	0	0	0	0	0	0
Chr02_4798	0	0	0	0	0	0	0	0	0	0	0	0
Chr02_4553	0	0	0	0	0	0	0	0	0	0	0	0
Chr02_4523	0	0	0	0	0	0	0	0	0	0	0	0
Chr02_4395	0	0	0	0	0	0	0	0	0	0	0	0
Chr02_4246	0	45.92	182.45	0	0	0	0	0	0	76.1233	0	0
Chr02_4208	0	0	0	0	0	0	0	0	0	0	0	0
Chr02_4119	0	0	0	0	0	0	0	0	0	0	0	0
Chr02_4105	0	0	0	0	56.5	0	0	0	0	0	18.8333	0
Chr02_3557	0	0	0	0	0	0	0	0	0	0	0	0
Chr01_618	0	0	0	0	0	0	0	0	0	0	0	0
Chr01_3238	0	0	0	0	0	0	0	0	0	0	0	0
Chr01_3237	0	0	0	0	0	0	0	0	0	0	0	0
Chr01_3123	0	0	0	0	0	0	0	0	0	0	0	0
Chr01_2952	0	0	0	0	0	0	0	0	0	0	0	0
Chr01_2857	0	0	0	0	0	0	0	0	0	0	0	0
Chr01_2593	0	0	0	0	0	0	0	0	0	0	0	0
Chr01_1727	0	0	0	0	0	0	0	0	0	0	0	0
Chr01_1666	0	91.84	0	0	0	0	0	0	0	30.6133	0	0
Chr01_147	0	0	0	0	0	0	0	0	0	0	0	0
Chr01_137	0	0	0	0	0	0	0	0	0	0	0	0
Chr01_1349	0	0	0	26.55	0	0	0	0	0	0	8.85	0
Chr01_1307	0	137.76	0	0	84.75	0	0	0	0	45.92	28.25	0
Chr01_1252	0	0	0	0	0	0	0	0	0	0	0	0

## Sheet: Details of all mRNA
Transcript id	Gene id	Gene name	Gene description	N210D_L1	N210D_L2	N210D_L3	N90D_L1	N90D_L2	N90D_L3	N30D_L1	N30D_L2	N30D_L3	GO id	KO_id	KO_name	Pathway_id	COG	nr	swissprot	Pfam
Pig.11379.1	Pig.11379	MOG-203	PREDICTED: myelin-oligodendrocyte glycoprotein isoform X2 [Tursiops truncatus]	0	0	0	0	0	0	0	0	0.05	GO:0007155(biological_process:cell adhesion); GO:0016021(cellular_component:integral component of membrane); GO:0042552(biological_process:myelination)	K17270	MOG		ENOG41119UE(U:Intracellular trafficking, secretion, and vesicular transport); ENOG4111D55(S:Function unknown)	NP_001116611.1(myelin-oligodendrocyte glycoprotein precursor [Sus scrofa])	sp|P55803|MOG_BOVIN(Myelin-oligodendrocyte glycoprotein OS=Bos taurus OX=9913 GN=MOG PE=1 SV=1)	PF07686.17(V-set:Immunoglobulin V-set domain); PF13927.6(Ig_3:Immunoglobulin domain); PF07679.16(I-set:Immunoglobulin I-set domain); PF00047.25(ig:Immunoglobulin domain)
Pig.14082.1	Pig.14082	LARP4B	la-related protein 4B isoform X3 [Sus scrofa]	19.45	19.23	18.99	9.32	8.12	8.85	24.81	31.91	30.47	GO:0003723(molecular_function:RNA binding)	K18763	LARP4		ENOG410XTHK(S:Function unknown); ENOG4111REM(S:Function unknown)	XP_020920729.1(la-related protein 4B isoform X3 [Sus scrofa])	sp|Q92615|LAR4B_HUMAN(La-related protein 4B OS=Homo sapiens OX=9606 GN=LARP4B PE=1 SV=3)	PF05383.17(La:La domain)
Pig.23124.1	Pig.23124	NRDE2-201	protein NRDE2 homolog isoform X1 [Sus scrofa]	1.15	1.1	0.76	1.06	0.6	1.03	1.81	2.79	3.27	GO:0016246(biological_process:RNA interference); GO:0031048(biological_process:chromatin silencing by small RNA); GO:0006396(biological_process:RNA processing)				ENOG410XPGD(S:Function unknown)	XP_020955262.1(protein NRDE2 homolog isoform X1 [Sus scrofa])	sp|Q9H7Z3|NRDE2_HUMAN(Protein NRDE2 homolog OS=Homo sapiens OX=9606 GN=NRDE2 PE=1 SV=3)	PF08424.10(NRDE-2:NRDE-2, necessary for RNA interference)
Pig.13980.1	Pig.13980	RIPPLY1-201	LOW QUALITY PROTEIN: protein ripply3 [Sus scrofa]	0.07	0	0	0	0	0.05	0.07	0.34	0					ENOG411273W(K:Transcription)	XP_001928108.3(LOW QUALITY PROTEIN: protein ripply3 [Sus scrofa])	sp|P57055|DSCR6_HUMAN(Protein ripply3 OS=Homo sapiens OX=9606 GN=RIPPLY3 PE=2 SV=1)	PF14998.6(Ripply:Transcription Regulator)
Pig.14719.1	Pig.14719	SHISAL2A-201	membrane protein FAM159A [Sus scrofa]	0	0	0	0	0	0	0	0	0	GO:0016021(cellular_component:integral component of membrane)				ENOG4111NS5(S:Function unknown)	XP_020952291.1(membrane protein FAM159A [Sus scrofa])	sp|Q6UWV7|SHL2A_HUMAN(Protein shisa-like-2A OS=Homo sapiens OX=9606 GN=SHISAL2A PE=2 SV=2)	PF13908.6(Shisa:Wnt and FGF inhibitory regulator)
Pig.12519.1	Pig.12519	RPL22-205	PREDICTED: 60S ribosomal protein L22 isoform X1 [Cricetulus griseus]	0.25	0.25	0.25	0.82	0.73	0	0.71	1.86	0.5	GO:0005737(cellular_component:cytoplasm); GO:0005840(cellular_component:ribosome); GO:0022625(cellular_component:cytosolic large ribosomal subunit); GO:0005634(cellular_component:nucleus); GO:0099577(biological_process:regulation of translation at presynapse, modulating synaptic transmission); GO:1990904(cellular_component:ribonucleoprotein complex); GO:0046632(biological_process:alpha-beta T cel…	K02891	RP-L22e, RPL22	map03010(Ribosome)	ENOG4111UVJ(J:Translation, ribosomal structure and biogenesis)	XP_024409940.1(60S ribosomal protein L22 isoform X1 [Desmodus rotundus])	sp|Q4R5I3|RL22_MACFA(60S ribosomal protein L22 OS=Macaca fascicularis OX=9541 GN=RPL22 PE=2 SV=3)	PF01776.17(Ribosomal_L22e:Ribosomal L22e protein family)
Pig.17299.1	Pig.17299	UHRF1BP1-201	LOW QUALITY PROTEIN: UHRF1-binding protein 1 [Sus scrofa]	2.46	3.1	2.85	1.46	1.62	1.52	4.52	6.13	5.81	GO:0042826(molecular_function:histone deacetylase binding); GO:0042802(molecular_function:identical protein binding)				ENOG410XQGP(S:Function unknown)	XP_020954271.1(LOW QUALITY PROTEIN: UHRF1-binding protein 1 [Sus scrofa])	sp|Q6BDS2|URFB1_HUMAN(UHRF1-binding protein 1 OS=Homo sapiens OX=9606 GN=UHRF1BP1 PE=1 SV=1)	PF12624.7(Chorein_N:N-terminal region of Chorein or VPS13)
Pig.14981.1	Pig.14981	CSE1L-202	PREDICTED: exportin-2 isoform X2 [Felis catus]	22.29	21.45	20.16	7.98	5.33	7.3	12.6	15.39	15.85	GO:0005737(cellular_component:cytoplasm); GO:0016020(cellular_component:membrane); GO:0005049(molecular_function:nuclear export signal receptor activity); GO:0070062(cellular_component:extracellular exosome); GO:0006611(biological_process:protein export from nucleus); GO:0008536(molecular_function:Ran GTPase binding); GO:0005829(cellular_component:cytosol); GO:0005635(cellular_component:nuclear e…	K18423	CSE1, CAS, XPO2		COG5657(T:Signal transduction mechanisms)	NP_001307.2(exportin-2 isoform 1 [Homo sapiens])	sp|P55060|XPO2_HUMAN(Exportin-2 OS=Homo sapiens OX=9606 GN=CSE1L PE=1 SV=3)	PF03378.15(CAS_CSE1:CAS/CSE protein, C-terminus); PF08506.10(Cse1:Cse1)
Pig.10270.1	Pig.10270	C16orf91-201	protein CCSMST1 [Sus scrofa]	6.17	9.42	7.81	7.44	6.76	5.38	6.77	7.97	6.48	GO:0016021(cellular_component:integral component of membrane)				ENOG410XUWS(S:Function unknown)	XP_003124770.1(protein CCSMST1 [Sus scrofa])	sp|Q4G0I0|CSMT1_HUMAN(Protein CCSMST1 OS=Homo sapiens OX=9606 GN=CCSMST1 PE=2 SV=1)	PF15013.6(CCSMST1:CCSMST1 family)
Pig.03816.1	Pig.03816	FSD1L-201	FSD1-like protein isoform X2 [Sus scrofa]	1.35	1.6	1.13	0.74	0.75	0.87	0.58	0.37	0.52					ENOG410ZECU(S:Function unknown); ENOG4111G04(S:Function unknown)	XP_005660371.1(FSD1-like protein isoform X2 [Sus scrofa])	sp|Q9BXM9|FSD1L_HUMAN(FSD1-like protein OS=Homo sapiens OX=9606 GN=FSD1L PE=1 SV=2)	PF00622.28(SPRY:SPRY domain); PF00041.21(fn3:Fibronectin type III domain)
Pig.04671.1	Pig.04671	PAPPA2-201	pappalysin-2 isoform X1 [Sus scrofa]	0.01	0.1	0.03	0.05	0.1	0.09	1.48	4.13	2.76	GO:0008270(molecular_function:zinc ion binding); GO:0008237(molecular_function:metallopeptidase activity); GO:0060349(biological_process:bone morphogenesis)	K08647	PAPPA2		ENOG410Y5CU(O:Posttranslational modification, protein turnover, chaperones)	XP_003130378.3(pappalysin-2 isoform X1 [Sus scrofa])	sp|Q9BXP8|PAPP2_HUMAN(Pappalysin-2 OS=Homo sapiens OX=9606 GN=PAPPA2 PE=1 SV=4)	PF13385.6(Laminin_G_3:Concanavalin A-like lectin/glucanases superfamily); PF05572.13(Peptidase_M43:Pregnancy-associated plasma protein-A); PF00084.20(Sushi:Sushi repeat (SCR repeat)); PF13948.6(DUF4215:Domain of unknown function (DUF4215)); PF02210.24(Laminin_G_2:Laminin G domain)
Pig.02052.1	Pig.02052	SLC18A3-201	vesicular acetylcholine transporter [Sus scrofa]	0	0	0	0	0	0	0	0	0	GO:0016021(cellular_component:integral component of membrane); GO:0055085(biological_process:transmembrane transport)	K14636	SLC18A3, VACHT	map04725(Cholinergic synapse); map04721(Synaptic vesicle cycle)	ENOG410XW69(U:Intracellular trafficking, secretion, and vesicular transport)	XP_013838900.2(vesicular acetylcholine transporter [Sus scrofa])	sp|Q16572|VACHT_HUMAN(Vesicular acetylcholine transporter OS=Homo sapiens OX=9606 GN=SLC18A3 PE=1 SV=2)	PF07690.16(MFS_1:Major Facilitator Superfamily); PF06779.14(MFS_4:Uncharacterised MFS-type transporter YbfB)
Pig.22577.1	Pig.22577	CD200-201	OX-2 membrane glycoprotein isoform X2 [Sus scrofa]	0	0.26	0	0.41	0	0	0.13	0.19	0.1	GO:0050776(biological_process:regulation of immune response); GO:0034113(biological_process:heterotypic cell-cell adhesion); GO:1904465(biological_process:negative regulation of matrix metallopeptidase secretion); GO:0009986(cellular_component:cell surface); GO:0032793(biological_process:positive regulation of CREB transcription factor activity); GO:0032088(biological_process:negative regulation …	K06556	CD200		ENOG410YRD3(S:Function unknown)	XP_003358857.1(OX-2 membrane glycoprotein isoform X2 [Sus scrofa])	sp|P41217|OX2G_HUMAN(OX-2 membrane glycoprotein OS=Homo sapiens OX=9606 GN=CD200 PE=1 SV=4)	PF00047.25(ig:Immunoglobulin domain); PF13927.6(Ig_3:Immunoglobulin domain); PF07686.17(V-set:Immunoglobulin V-set domain)
MSTRG.43256.2	MSTRG.43256			268.93	232.3	338.53	133.55	110.94	122.13	632.6	1059.19	1075.9	GO:0005856(cellular_component:cytoskeleton); GO:0060271(biological_process:cilium assembly); GO:0045010(biological_process:actin nucleation); GO:0005829(cellular_component:cytosol); GO:0051016(biological_process:barbed-end actin filament capping); GO:0051015(molecular_function:actin filament binding); GO:0051014(biological_process:actin filament severing); GO:0005576(cellular_component:extracellu…	K05768	GSN	map04666(Fc gamma R-mediated phagocytosis); map05203(Viral carcinogenesis); map04810(Regulation of actin cytoskeleton)	ENOG410XR0A(P:Inorganic ion transport and metabolism)	P20305.1(RecName: Full=Gelsolin; AltName: Full=Actin-depolymerizing factor; Short=ADF; AltName: Full=Brevin; Flags: Precursor >AAA31042.1 plasma gelsolin precursor, partial [Sus scrofa] >CAA32077.1 gelsolin, partial [Sus scrofa])	sp|P20305|GELS_PIG(Gelsolin (Fragment) OS=Sus scrofa OX=9823 GN=GSN PE=1 SV=1)	PF00626.22(Gelsolin:Gelsolin repeat)
Pig.03114.1	Pig.03114	AHDC1	LOW QUALITY PROTEIN: AT-hook DNA-binding motif-containing protein 1 [Sus scrofa]	3.13	3.95	2.37	3.86	3.27	3.31	9.17	10.61	8.09	GO:0003677(molecular_function:DNA binding)				ENOG4110FBK(L:Replication, recombination and repair)	XP_020951301.1(LOW QUALITY PROTEIN: AT-hook DNA-binding motif-containing protein 1 [Sus scrofa])	sp|Q5TGY3|AHDC1_HUMAN(AT-hook DNA-binding motif-containing protein 1 OS=Homo sapiens OX=9606 GN=AHDC1 PE=1 SV=1)	PF15735.5(DUF4683:Domain of unknown function (DUF4683))
Pig.09627.1	Pig.09627	TMEM242-201	transmembrane protein 242 [Sus scrofa]	3.57	3.5	1.23	1.65	2.28	1.11	2.08	2.54	3.58	GO:0016021(cellular_component:integral component of membrane)				ENOG4111SBW(S:Function unknown)	NP_001172094.1(transmembrane protein 242 [Sus scrofa])	sp|Q5R987|TM242_PONAB(Transmembrane protein 242 OS=Pongo abelii OX=9601 GN=TMEM242 PE=2 SV=1)	PF07096.11(DUF1358:Protein of unknown function (DUF1358))
Pig.09830.1	Pig.09830	SLC35A2-201	PREDICTED: UDP-galactose translocator isoform X2 [Orycteropus afer afer]	6.35	6.38	5.02	2.12	1.68	1.7	8.27	10.47	8.49	GO:0005794(cellular_component:Golgi apparatus); GO:0005783(cellular_component:endoplasmic reticulum); GO:0016021(cellular_component:integral component of membrane); GO:0000139(cellular_component:Golgi membrane); GO:0006012(biological_process:galactose metabolic process); GO:0005459(molecular_function:UDP-galactose transmembrane transporter activity); GO:0015165(molecular_function:pyrimidine nucle…	K15272	SLC35A1_2_3		COG0697(A:RNA processing and modification)	XP_013841574.2(UDP-galactose translocator isoform X1 [Sus scrofa])	sp|P78381|S35A2_HUMAN(UDP-galactose translocator OS=Homo sapiens OX=9606 GN=SLC35A2 PE=1 SV=1)	PF04142.15(Nuc_sug_transp:Nucleotide-sugar transporter); PF00892.20(EamA:EamA-like transporter family)
MSTRG.43172.2	MSTRG.43172			6.97	7.95	12.99	27.26	22.63	27.37	21.45	28.36	27.03	GO:0003964(molecular_function:RNA-directed DNA polymerase activity); GO:0004519(molecular_function:endonuclease activity)				ENOG410Y3WU(S:Function unknown)	TKS23784.1(hypothetical protein Cadr_00027945 [Camelus dromedarius])	sp|P11369|LORF2_MOUSE(LINE-1 retrotransposable element ORF2 protein OS=Mus musculus OX=10090 GN=Pol PE=1 SV=2)
MSTRG.5781.2	MSTRG.5781			2.42	0.6	0.7	0.72	0.75	0.78	1.23	1.09	1.25	GO:0046872(molecular_function:metal ion binding)	K15709	RNF187		ENOG4111A5E(O:Posttranslational modification, protein turnover, chaperones)	XP_020940717.1(E3 ubiquitin-protein ligase RNF187 [Sus scrofa])	sp|Q5TA31|RN187_HUMAN(E3 ubiquitin-protein ligase RNF187 OS=Homo sapiens OX=9606 GN=RNF187 PE=1 SV=2)
MSTRG.29085.1	MSTRG.29085			0.54	0.74	0.36	0.44	0.46	0.43	1.86	2.55	2.16	GO:0070182(molecular_function:DNA polymerase binding); GO:0000184(biological_process:nuclear-transcribed mRNA catabolic process, nonsense-mediated decay); GO:0005730(cellular_component:nucleolus); GO:1904354(biological_process:negative regulation of telomere capping); GO:0042162(molecular_function:telomeric DNA binding); GO:0005829(cellular_component:cytosol); GO:0004521(molecular_function:endori…	K11124	SMG6, EST1A	map03015(mRNA surveillance pathway)	ENOG410XR9Z(S:Function unknown)	XP_020923245.1(telomerase-binding protein EST1A isoform X1 [Sus scrofa])	sp|Q5RAK6|EST1A_PONAB(Telomerase-binding protein EST1A OS=Pongo abelii OX=9601 GN=SMG6 PE=2 SV=1)	PF10373.9(EST1_DNA_bind:Est1 DNA/RNA binding domain); PF13638.6(PIN_4:PIN domain); PF10374.9(EST1:Telomerase activating protein Est1); PF01866.17(Diphthamide_syn:Putative diphthamide synthesis protein); PF00096.26(zf-C2H2:Zinc finger, C2H2 type); PF13894.6(zf-C2H2_4:C2H2-type zinc finger); PF13465.6(zf-H2C2_2:Zinc-finger double domain); PF12171.8(zf-C2H2_jaz:Zinc-finger double-stranded RNA-bindin…
Pig.10947.1	Pig.10947	LOC101137374	uncharacterized protein LOC106504483 [Sus scrofa]	0.22	0	0	0.08	0	0	0	0	0					ENOG411162U(S:Function unknown)	XP_013833692.1(uncharacterized protein LOC106504483 [Sus scrofa])	sp|A0A0B4J277|TVA22_HUMAN(T cell receptor alpha variable 22 OS=Homo sapiens OX=9606 GN=TRAV22 PE=1 SV=1)	PF07686.17(V-set:Immunoglobulin V-set domain); PF07679.16(I-set:Immunoglobulin I-set domain); PF13927.6(Ig_3:Immunoglobulin domain); PF13895.6(Ig_2:Immunoglobulin domain); PF00047.25(ig:Immunoglobulin domain)
Pig.14610.1	Pig.14610	AK8-201	adenylate kinase 8 isoform X3 [Sus scrofa]	1.23	1.52	1.47	1.04	1.14	1.29	3.62	4.05	2.85	GO:0021591(biological_process:ventricular system development); GO:0009142(biological_process:nucleoside triphosphate biosynthetic process); GO:0004127(molecular_function:cytidylate kinase activity); GO:0004550(molecular_function:nucleoside diphosphate kinase activity); GO:0004017(molecular_function:adenylate kinase activity); GO:0036126(cellular_component:sperm flagellum); GO:0005930(cellular_com…	K00939	adk, AK	map00730(Thiamine metabolism); map00230(Purine metabolism)	COG0563(S:Function unknown)	XP_020926494.1(adenylate kinase 8 isoform X3 [Sus scrofa])	sp|Q96MA6|KAD8_HUMAN(Adenylate kinase 8 OS=Homo sapiens OX=9606 GN=AK8 PE=1 SV=1)	PF00406.22(ADK:Adenylate kinase); PF13207.6(AAA_17:AAA domain); PF17213.3(Hydin_ADK:Hydin Adenylate kinase-like domain); PF13238.6(AAA_18:AAA domain); PF13671.6(AAA_33:AAA domain); PF00004.29(AAA:ATPase family associated with various cellular activities (AAA)); PF17824.1(DUF5586:Family of unknown function (DUF5586))
Pig.05739.1	Pig.05739	PRR14L-201	protein PRR14L isoform X1 [Sus scrofa]	5.67	6.66	6.94	4.21	3.35	3.97	10.88	16.2	10.56					ENOG4111V15(S:Function unknown)	XP_001925074.2(protein PRR14L isoform X1 [Sus scrofa])	sp|Q5THK1|PR14L_HUMAN(Protein PRR14L OS=Homo sapiens OX=9606 GN=PRR14L PE=1 SV=1)	PF15386.6(Tantalus:Drosophila Tantalus-like)
Pig.04318.1	Pig.04318	ZFYVE26-201	LOW QUALITY PROTEIN: zinc finger FYVE domain-containing protein 26 [Sus scrofa]	3.39	4.45	4.64	2.1	1.83	2.23	11.25	16.72	13.67	GO:0000281(biological_process:mitotic cytokinesis); GO:0046872(molecular_function:metal ion binding); GO:0032266(molecular_function:phosphatidylinositol-3-phosphate binding); GO:0000724(biological_process:double-strand break repair via homologous recombination)	K19027	ZFYVE26		ENOG410XRV7(S:Function unknown)	XP_020955055.1(LOW QUALITY PROTEIN: zinc finger FYVE domain-containing protein 26 [Sus scrofa])	sp|D2H5P6|ZFY26_AILME(Zinc finger FYVE domain-containing protein 26 OS=Ailuropoda melanoleuca OX=9646 GN=ZFYVE26 PE=3 SV=1)	PF01363.21(FYVE:FYVE zinc finger)
Pig.14705.1	Pig.14705	TMCC1-203	PREDICTED: transmembrane and coiled-coil domains protein 1 isoform X1 [Ceratotherium simum simum]	7.93	7	6.94	9.92	10.79	11.2	25.01	36.59	25.58	GO:0016197(biological_process:endosomal transport); GO:0097750(biological_process:endosome membrane tubulation); GO:0005791(cellular_component:rough endoplasmic reticulum); GO:0007029(biological_process:endoplasmic reticulum organization); GO:0051260(biological_process:protein homooligomerization); GO:0005829(cellular_component:cytosol); GO:0051291(biological_process:protein heterooligomerization…				ENOG410Y9KV(U:Intracellular trafficking, secretion, and vesicular transport)	XP_014652252.1(PREDICTED: transmembrane and coiled-coil domains protein 1 isoform X1 [Ceratotherium simum simum])	sp|Q69ZZ6|TMCC1_MOUSE(Transmembrane and coiled-coil domains protein 1 OS=Mus musculus OX=10090 GN=Tmcc1 PE=1 SV=2)	PF10267.9(Tmemb_cc2:Predicted transmembrane and coiled-coil 2 protein); PF04791.16(LMBR1:LMBR1-like membrane protein)
Pig.02282.1	Pig.02282	FAM214A-201	protein FAM214A isoform X3 [Sus scrofa]	9.84	7.22	11.88	3.76	2.27	4.6	9.04	13.94	9.97					ENOG41115V6(S:Function unknown)	XP_005659650.1(protein FAM214A isoform X3 [Sus scrofa])	sp|Q32MH5|F214A_HUMAN(Protein FAM214A OS=Homo sapiens OX=9606 GN=FAM214A PE=1 SV=2)	PF13889.6(Chromosome_seg:Chromosome segregation during meiosis); PF13915.6(DUF4210:Domain of unknown function (DUF4210))
Pig.04124.1	Pig.04124	TMTC2-202	PREDICTED: transmembrane and TPR repeat-containing protein 2-like, partial [Physeter catodon]	3.18	3.85	3.63	3.2	3.13	2.52	3.14	3.8	2.32	GO:0005789(cellular_component:endoplasmic reticulum membrane); GO:0016021(cellular_component:integral component of membrane); GO:0035269(biological_process:protein O-linked mannosylation); GO:0055074(biological_process:calcium ion homeostasis); GO:0000030(molecular_function:mannosyltransferase activity)				COG0457(O:Posttranslational modification, protein turnover, chaperones); ENOG410XP5Q(O:Posttranslational modification, protein turnover, chaperones)	VCW99308.1(unnamed protein product, partial [Gulo gulo])	sp|Q8N394|TMTC2_HUMAN(Protein O-mannosyl-transferase TMTC2 OS=Homo sapiens OX=9606 GN=TMTC2 PE=1 SV=1)	PF07719.17(TPR_2:Tetratricopeptide repeat); PF13181.6(TPR_8:Tetratricopeptide repeat); PF00515.28(TPR_1:Tetratricopeptide repeat); PF13424.6(TPR_12:Tetratricopeptide repeat); PF13176.6(TPR_7:Tetratricopeptide repeat); PF13374.6(TPR_10:Tetratricopeptide repeat); PF13414.6(TPR_11:TPR repeat); PF13432.6(TPR_16:Tetratricopeptide repeat); PF14559.6(TPR_19:Tetratricopeptide repeat); PF17874.1(TPR_MalT:…
MSTRG.33388.1	MSTRG.33388			5.7	5.61	13.58	24.59	17.98	22.02	14.4	19.62	20.99	GO:0005737(cellular_component:cytoplasm); GO:0010494(cellular_component:cytoplasmic stress granule); GO:0005730(cellular_component:nucleolus); GO:0032197(biological_process:transposition, RNA-mediated); GO:1990904(cellular_component:ribonucleoprotein complex); GO:0000166(molecular_function:nucleotide binding); GO:0003727(molecular_function:single-stranded RNA binding); GO:0036464(cellular_compone…					AAY53483.1(transposase [Bos taurus])	sp|Q9UN81|LORF1_HUMAN(LINE-1 retrotransposable element ORF1 protein OS=Homo sapiens OX=9606 GN=L1RE1 PE=1 SV=1)	PF02994.14(Transposase_22:L1 transposable element RBD-like domain); PF17490.2(Tnp_22_dsRBD:L1 transposable element dsRBD-like domain); PF17489.2(Tnp_22_trimer:L1 transposable element trimerization domain)
Pig.22225.1	Pig.22225	DNAH1-201	LOW QUALITY PROTEIN: dynein heavy chain domain-containing protein 1 [Sus scrofa]	0.02	0.03	0.05	0.06	0.07	0.1	0.07	0.1	0.09	GO:0030286(cellular_component:dynein complex); GO:0007018(biological_process:microtubule-based movement); GO:0003777(molecular_function:microtubule motor activity); GO:0005524(molecular_function:ATP binding)				ENOG410XZRW(Z:Cytoskeleton); COG5245(Z:Cytoskeleton)	XP_020917997.1(LOW QUALITY PROTEIN: dynein heavy chain domain-containing protein 1 [Sus scrofa])	sp|Q96M86|DNHD1_HUMAN(Dynein heavy chain domain-containing protein 1 OS=Homo sapiens OX=9606 GN=DNHD1 PE=2 SV=2)	PF12774.7(AAA_6:Hydrolytic ATP binding site of dynein motor region); PF18199.1(Dynein_C:Dynein heavy chain C-terminal domain); PF12780.7(AAA_8:P-loop containing dynein motor region D4); PF08393.13(DHC_N2:Dynein heavy chain, N-terminal region 2); PF03028.15(Dynein_heavy:Dynein heavy chain region D6 P-loop domain); PF12775.7(AAA_7:P-loop containing dynein motor region); PF12777.7(MT:Microtubule-bin…
Pig.20307.1	Pig.20307	LPIN1-202	PREDICTED: phosphatidate phosphatase LPIN1-like, partial [Equus asinus]	0	0	0	1.13	0	1.13	22.59	22.18	4.54	GO:0009062(biological_process:fatty acid catabolic process); GO:0006357(biological_process:regulation of transcription from RNA polymerase II promoter); GO:0008195(molecular_function:phosphatidate phosphatase activity); GO:0019432(biological_process:triglyceride biosynthetic process)	K15728	LPIN	map00564(Glycerophospholipid metabolism); map00561(Glycerolipid metabolism)	COG5083(O:Posttranslational modification, protein turnover, chaperones)	DAA24473.1(TPA: lipin 1-like [Bos taurus])	sp|Q91ZP3|LPIN1_MOUSE(Phosphatidate phosphatase LPIN1 OS=Mus musculus OX=10090 GN=Lpin1 PE=1 SV=1)	PF04571.14(Lipin_N:lipin, N-terminal conserved region)
MSTRG.27616.1	MSTRG.27616			2.39	2.07	3.54	5.69	4.47	5.62	3.73	7.45	4.85	GO:0003964(molecular_function:RNA-directed DNA polymerase activity); GO:0004519(molecular_function:endonuclease activity)				ENOG410Y3WU(S:Function unknown)	ABR01162.1(endonuclease/reverse transcriptase [Sus scrofa])	sp|O00370|LORF2_HUMAN(LINE-1 retrotransposable element ORF2 protein OS=Homo sapiens OX=9606 PE=1 SV=1)	PF12488.8(DUF3704:Protein of unknown function (DUF3704)); PF08333.11(DUF1725:Protein of unknown function (DUF1725))
Pig.07922.1	Pig.07922	TMEM89-201	transmembrane protein 89 [Sus scrofa]	0	0	0	0	0	0	0	0	0	GO:0016021(cellular_component:integral component of membrane)				ENOG4111CPB(S:Function unknown)	XP_003132239.1(transmembrane protein 89 [Sus scrofa])	sp|A2RUT3|TMM89_HUMAN(Transmembrane protein 89 OS=Homo sapiens OX=9606 GN=TMEM89 PE=2 SV=1)	PF15098.6(TMEM89:TMEM89 protein family)
Pig.14973.1	Pig.14973	SLC2A10-201	LOW QUALITY PROTEIN: solute carrier family 2, facilitated glucose transporter member 10 [Sus scrofa]	0.79	0.46	0.97	0.84	0.4	0.59	1.71	3.25	2.19	GO:0022857(molecular_function:transmembrane transporter activity); GO:0016021(cellular_component:integral component of membrane); GO:0008643(biological_process:carbohydrate transport)	K08147	SLC2A10, GLUT10		ENOG410XNQK(G:Carbohydrate transport and metabolism)	XP_005673051.2(LOW QUALITY PROTEIN: solute carrier family 2, facilitated glucose transporter member 10 [Sus scrofa])	sp|O95528|GTR10_HUMAN(Solute carrier family 2, facilitated glucose transporter member 10 OS=Homo sapiens OX=9606 GN=SLC2A10 PE=1 SV=2)	PF00083.24(Sugar_tr:Sugar (and other) transporter); PF07690.16(MFS_1:Major Facilitator Superfamily)
Pig.22703.1	Pig.22703	LOC101151870	immunoglobulin kappa variable region, partial [Sus scrofa]	2.08	1.73	1.09	0.87	0.29	0.34	0	0.29	0					ENOG410YQB2(S:Function unknown); ENOG410ZN1U(S:Function unknown)	AAR99919.1(immunoglobulin kappa variable region, partial [Sus scrofa])	sp|A2NJV5|KV229_HUMAN(Immunoglobulin kappa variable 2-29 OS=Homo sapiens OX=9606 GN=IGKV2-29 PE=3 SV=2)	PF07686.17(V-set:Immunoglobulin V-set domain); PF13927.6(Ig_3:Immunoglobulin domain); PF00047.25(ig:Immunoglobulin domain)
Pig.16959.1	Pig.16959	VSTM1-201	V-set and transmembrane domain-containing protein 1 isoform X1 [Sus scrofa]	0.22	0.22	0.28	0.08	0.13	0.08	0	0	0.34					ENOG4111920(U:Intracellular trafficking, secretion, and vesicular transport)	XP_020950550.1(V-set and transmembrane domain-containing protein 1 isoform X1 [Sus scrofa])	sp|Q6UX27|VSTM1_HUMAN(V-set and transmembrane domain-containing protein 1 OS=Homo sapiens OX=9606 GN=VSTM1 PE=1 SV=2)	PF00047.25(ig:Immunoglobulin domain); PF13895.6(Ig_2:Immunoglobulin domain)
MSTRG.40309.3	MSTRG.40309			0.06	0.05	0.1	0.11	0.09	0.12	0.08	0.1	0.15					COG0471(P:Inorganic ion transport and metabolism)	XP_005609557.2(short transmembrane mitochondrial protein 1 [Equus caballus])	sp|Q9UKG4|S13A4_HUMAN(Solute carrier family 13 member 4 OS=Homo sapiens OX=9606 GN=SLC13A4 PE=1 SV=2)	PF15054.6(DUF4535:Domain of unknown function (DUF4535)); PF00939.19(Na_sulph_symp:Sodium:sulfate symporter transmembrane region)
Pig.04053.1	Pig.04053	GAS2L3-202	GAS2-like protein 3 isoform X1 [Sus scrofa]	2.78	3.15	2.75	1.28	0.83	1.19	1.31	1.27	0.87	GO:0003779(molecular_function:actin binding); GO:0005856(cellular_component:cytoskeleton); GO:0008017(molecular_function:microtubule binding); GO:0000226(biological_process:microtubule cytoskeleton organization); GO:0030036(biological_process:actin cytoskeleton organization)				ENOG410Z7C5(Z:Cytoskeleton)	XP_020948363.1(GAS2-like protein 3 isoform X1 [Sus scrofa])	sp|Q86XJ1|GA2L3_HUMAN(GAS2-like protein 3 OS=Homo sapiens OX=9606 GN=GAS2L3 PE=1 SV=1)	PF02187.17(GAS2:Growth-Arrest-Specific Protein 2 Domain); PF00307.31(CH:Calponin homology (CH) domain)
Pig.19888.1	Pig.19888	OPLAH-201	PREDICTED: 5-oxoprolinase isoform X1 [Capra hircus]	1.99	2.86	2.52	1.74	1.57	1.41	2.33	4.76	2.17	GO:0016787(molecular_function:hydrolase activity)	K01469	OPLAH, OXP1, oplAH	map00480(Glutathione metabolism)	COG0145(E:Amino acid transport and metabolism); COG0145(Q:Secondary metabolites biosynthesis, transport and catabolism)	XP_027463878.1(5-oxoprolinase isoform X1 [Zalophus californianus])	sp|Q75WB5|OPLA_BOVIN(5-oxoprolinase OS=Bos taurus OX=9913 GN=OPLAH PE=1 SV=1)	PF02538.14(Hydantoinase_B:Hydantoinase B/oxoprolinase); PF01968.18(Hydantoinase_A:Hydantoinase/oxoprolinase); PF05378.13(Hydant_A_N:Hydantoinase/oxoprolinase N-terminal region); PF15058.6(Speriolin_N:Speriolin N terminus)
Pig.11730.1	Pig.11730	MYL1-203	PREDICTED: myosin light chain 1/3, skeletal muscle isoform isoform X1 [Rhinolophus sinicus]	3.55	1.79	2.92	2.42	1.84	1.34	3.69	2.71	3.48	GO:0043292(cellular_component:contractile fiber); GO:0030016(cellular_component:myofibril); GO:0016459(cellular_component:myosin complex); GO:0060048(biological_process:cardiac muscle contraction); GO:0005509(molecular_function:calcium ion binding)	K05738	MYL1		COG5126(I:Lipid transport and metabolism)	XP_007123876.2(myosin light chain 1/3, skeletal muscle isoform isoform X5 [Physeter catodon])	sp|A0JNJ5|MYL1_BOVIN(Myosin light chain 1/3, skeletal muscle isoform OS=Bos taurus OX=9913 GN=MYL1 PE=2 SV=1)	PF13405.6(EF-hand_6:EF-hand domain); PF00036.32(EF-hand_1:EF hand); PF13499.6(EF-hand_7:EF-hand domain pair)
Pig.15993.1	Pig.15993	FFAR3	free fatty acid receptor 3 [Sus scrofa]	0	0	0	0.03	0	0	0.04	0	0	GO:0004930(molecular_function:G-protein coupled receptor activity); GO:0016021(cellular_component:integral component of membrane)	K04326	FFAR3, GPR41		ENOG4111Q82(I:Lipid transport and metabolism)	NP_001302530.1(free fatty acid receptor 3 [Sus scrofa])	sp|O14843|FFAR3_HUMAN(Free fatty acid receptor 3 OS=Homo sapiens OX=9606 GN=FFAR3 PE=1 SV=1)	PF00001.21(7tm_1:7 transmembrane receptor (rhodopsin family)); PF10328.9(7TM_GPCR_Srx:Serpentine type 7TM GPCR chemoreceptor Srx)
MSTRG.35863.1	MSTRG.35863			28.64	16.2	24.79	5.18	5.33	6.03	27.68	32.99	22.62	GO:0097201(biological_process:negative regulation of transcription from RNA polymerase II promoter in response to stress); GO:0008625(biological_process:extrinsic apoptotic signaling pathway via death domain receptors); GO:0101031(cellular_component:chaperone complex); GO:0034605(biological_process:cellular response to heat); GO:0051087(molecular_function:chaperone binding); GO:0046716(biological…	K09557	BAG3		COG5021(S:Function unknown)	XP_020929117.1(LOW QUALITY PROTEIN: BAG family molecular chaperone regulator 3 [Sus scrofa])	sp|O95817|BAG3_HUMAN(BAG family molecular chaperone regulator 3 OS=Homo sapiens OX=9606 GN=BAG3 PE=1 SV=3)	PF02179.16(BAG:BAG domain); PF00397.26(WW:WW domain)
Pig.06295.1	Pig.06295	OR2Y1	olfactory receptor 2Y1 [Sus scrofa]	0	0	0	0	0	0	0	0.43	0	GO:0004930(molecular_function:G-protein coupled receptor activity); GO:0005886(cellular_component:plasma membrane); GO:0016021(cellular_component:integral component of membrane); GO:0004984(molecular_function:olfactory receptor activity)	K04257	OLFR	map04740(Olfactory transduction)	ENOG41118P0(U:Intracellular trafficking, secretion, and vesicular transport)	XP_020939077.1(olfactory receptor 2Y1 [Sus scrofa])	sp|Q8NGV0|OR2Y1_HUMAN(Olfactory receptor 2Y1 OS=Homo sapiens OX=9606 GN=OR2Y1 PE=2 SV=1)	PF13853.6(7tm_4:Olfactory receptor); PF00001.21(7tm_1:7 transmembrane receptor (rhodopsin family)); PF10320.9(7TM_GPCR_Srsx:Serpentine type 7TM GPCR chemoreceptor Srsx)
Pig.22108.1	Pig.22108	TBX5-201	T-box transcription factor TBX5 isoform X1 [Sus scrofa]	0.09	0.2	0	0.03	0.08	0.05	1.98	1.51	3.39	GO:0030324(biological_process:lung development); GO:0003281(biological_process:ventricular septum development); GO:0060044(biological_process:negative regulation of cardiac muscle cell proliferation); GO:0060045(biological_process:positive regulation of cardiac muscle cell proliferation); GO:0003677(molecular_function:DNA binding); GO:0051891(biological_process:positive regulation of cardioblast …	K10179	TBX5, HOS		ENOG410XSTS(S:Function unknown)	XP_013838364.1(T-box transcription factor TBX5 isoform X1 [Sus scrofa])	sp|Q99593|TBX5_HUMAN(T-box transcription factor TBX5 OS=Homo sapiens OX=9606 GN=TBX5 PE=1 SV=2)	PF00907.22(T-box:T-box)
Pig.12241.1	Pig.12241	FUT3	galactoside 3(4)-L-fucosyltransferase [Sus scrofa]	0	0	0	0	0	0	0.03	0.05	0	GO:0036065(biological_process:fucosylation); GO:0006486(biological_process:protein glycosylation); GO:0016021(cellular_component:integral component of membrane); GO:0008417(molecular_function:fucosyltransferase activity); GO:0032580(cellular_component:Golgi cisterna membrane); GO:0046920(molecular_function:alpha-(1->3)-fucosyltransferase activity)	K00716	FUT3	map00601(Glycosphingolipid biosynthesis - lacto and neolacto series)	ENOG410ZIMX(S:Function unknown)	XP_003123142.1(galactoside 3(4)-L-fucosyltransferase [Sus scrofa])	sp|Q11126|FUT3_BOVIN(Galactoside 3(4)-L-fucosyltransferase OS=Bos taurus OX=9913 GN=FUT3 PE=2 SV=2)	PF00852.19(Glyco_transf_10:Glycosyltransferase family 10 (fucosyltransferase) C-term); PF17039.5(Glyco_tran_10_N:Fucosyltransferase, N-terminal)
Pig.11720.1	Pig.11720	PIKFYVE-206	1-phosphatidylinositol 3-phosphate 5-kinase isoform X1 [Sus scrofa]	2.39	2.61	3.57	2.1	1.66	2.22	3.84	3.9	5.24	GO:0034504(biological_process:protein localization to nucleus); GO:0016308(molecular_function:1-phosphatidylinositol-4-phosphate 5-kinase activity); GO:0045121(cellular_component:membrane raft); GO:0005911(cellular_component:cell-cell junction); GO:0042147(biological_process:retrograde transport, endosome to Golgi); GO:0000285(molecular_function:1-phosphatidylinositol-3-phosphate 5-kinase activit…	K00921	PIKFYVE, FAB1	map04145(Phagosome); map04070(Phosphatidylinositol signaling system); map04810(Regulation of actin cytoskeleton); map00562(Inositol phosphate metabolism)	COG0459(S:Function unknown)	XP_013839888.1(1-phosphatidylinositol 3-phosphate 5-kinase isoform X1 [Sus scrofa])	sp|Q9Y2I7|FYV1_HUMAN(1-phosphatidylinositol 3-phosphate 5-kinase OS=Homo sapiens OX=9606 GN=PIKFYVE PE=1 SV=3)	PF01504.18(PIP5K:Phosphatidylinositol-4-phosphate 5-Kinase); PF00118.24(Cpn60_TCP1:TCP-1/cpn60 chaperonin family); PF00610.21(DEP:Domain found in Dishevelled, Egl-10, and Pleckstrin (DEP)); PF01363.21(FYVE:FYVE zinc finger)
Pig.12899.1	Pig.12899	NUMA1-205	nuclear mitotic apparatus protein 1 isoform X1 [Sus scrofa]	15.46	18.27	17.22	8.44	8.48	9.72	38.66	48.75	50.54	GO:0019897(cellular_component:extrinsic component of plasma membrane); GO:0008022(molecular_function:protein C-terminus binding); GO:0032388(biological_process:positive regulation of intracellular transport); GO:0031116(biological_process:positive regulation of microtubule polymerization); GO:0035371(cellular_component:microtubule plus-end); GO:1905720(cellular_component:cytoplasmic microtubule b…	K16808	NUMA1		ENOG41125FF(U:Intracellular trafficking, secretion, and vesicular transport)	XP_005653721.1(nuclear mitotic apparatus protein 1 isoform X1 [Sus scrofa])	sp|Q14980|NUMA1_HUMAN(Nuclear mitotic apparatus protein 1 OS=Homo sapiens OX=9606 GN=NUMA1 PE=1 SV=2)
Pig.06277.1	Pig.06277	NLRP3-202	NACHT, LRR and PYD domains-containing protein 3 [Sus scrofa]	0.67	0.6	1.37	0.96	0.59	0.5	1.91	2.92	2.97	GO:0071224(biological_process:cellular response to peptidoglycan); GO:0071222(biological_process:cellular response to lipopolysaccharide); GO:0005783(cellular_component:endoplasmic reticulum); GO:0032621(biological_process:interleukin-18 production); GO:1901223(biological_process:negative regulation of NIK/NF-kappaB signaling); GO:2000321(biological_process:positive regulation of T-helper 17 cell…	K12800	NLRP3, PYPAF1	map05164(Influenza A); map04621(NOD-like receptor signaling pathway); map04217(Necroptosis); map05133(Pertussis); map04625(C-type lectin receptor signaling pathway)	ENOG4111H3D(S:Function unknown)	NP_001243699.1(NACHT, LRR and PYD domains-containing protein 3 [Sus scrofa])	sp|A6QLE5|NLRP3_BOVIN(NACHT, LRR and PYD domains-containing protein 3 OS=Bos taurus OX=9913 GN=NLRP3 PE=2 SV=1)	PF05729.12(NACHT:NACHT domain); PF17776.1(NLRC4_HD2:NLRC4 helical domain HD2); PF02758.16(PYRIN:PAAD/DAPIN/Pyrin domain); PF17779.1(NOD2_WH:NOD2 winged helix domain); PF13516.6(LRR_6:Leucine Rich repeat); PF14484.6(FISNA:Fish-specific NACHT associated domain); PF12799.7(LRR_4:Leucine Rich repeats (2 copies))
Pig.12340.1	Pig.12340	AMH-202	PREDICTED: splicing factor 3A subunit 2 [Equus asinus]	12.04	22.1	17.01	7.85	5.97	5.46	25.95	35.05	30.94	GO:0016607(cellular_component:nuclear speck); GO:0071004(cellular_component:U2-type prespliceosome); GO:0000245(biological_process:spliceosomal complex assembly); GO:0071013(cellular_component:catalytic step 2 spliceosome); GO:0000398(biological_process:mRNA splicing, via spliceosome); GO:0071005(cellular_component:U2-type precatalytic spliceosome); GO:0008270(molecular_function:zinc ion binding)…	K12826	SF3A2, SAP62	map03040(Spliceosome)	COG5246(A:RNA processing and modification)	XP_020939852.1(splicing factor 3A subunit 2 [Sus scrofa])	sp|A5PJN8|SF3A2_BOVIN(Splicing factor 3A subunit 2 OS=Bos taurus OX=9913 GN=SF3A2 PE=2 SV=1)	PF16835.5(SF3A2:Pre-mRNA-splicing factor SF3a complex subunit 2 (Prp11)); PF12874.7(zf-met:Zinc-finger of C2H2 type); PF09732.9(CactinC_cactus:Cactus-binding C-terminus of cactin protein)
Pig.20317.1	Pig.20317	IL4I1-202	putative ribonuclease [Sus scrofa]	13.72	14	10.83	10.42	6.72	11.71	12.6	14.53	25.36	GO:0004521(molecular_function:endoribonuclease activity); GO:0005634(cellular_component:nucleus); GO:0004222(molecular_function:metalloendopeptidase activity); GO:0006364(biological_process:rRNA processing)				COG0319(S:Function unknown)	XP_020938154.1(putative ribonuclease [Sus scrofa])	sp|P58557|YBEY_HUMAN(Endoribonuclease YbeY OS=Homo sapiens OX=9606 GN=YBEY PE=1 SV=2)	PF02130.17(UPF0054:Uncharacterized protein family UPF0054)
Pig.07469.1	Pig.07469	LRRC34-201	leucine-rich repeat-containing protein 34 isoform X1 [Sus scrofa]	0.06	0.08	0.09	0	0.07	0.08	0	0	0					ENOG410ZBX3(S:Function unknown)	XP_020925422.1(leucine-rich repeat-containing protein 34 isoform X1 [Sus scrofa])	sp|Q8IZ02|LRC34_HUMAN(Leucine-rich repeat-containing protein 34 OS=Homo sapiens OX=9606 GN=LRRC34 PE=2 SV=3)	PF13516.6(LRR_6:Leucine Rich repeat); PF12799.7(LRR_4:Leucine Rich repeats (2 copies))
Pig.14963.1	Pig.14963	SLC35C2-201	solute carrier family 35, member C2 [Sus scrofa]	14.78	16.32	13.93	10.64	13.26	13.87	7.18	9.65	8.64	GO:0005794(cellular_component:Golgi apparatus); GO:0015297(molecular_function:antiporter activity); GO:0036066(biological_process:protein O-linked fucosylation); GO:0005793(cellular_component:endoplasmic reticulum-Golgi intermediate compartment); GO:0005801(cellular_component:cis-Golgi network); GO:0016021(cellular_component:integral component of membrane); GO:0033116(cellular_component:endoplasm…	K15280	SLC35C2		COG0697(U:Intracellular trafficking, secretion, and vesicular transport)	NP_001172088.1(solute carrier family 35, member C2 [Sus scrofa])	sp|Q9NQQ7|S35C2_HUMAN(Solute carrier family 35 member C2 OS=Homo sapiens OX=9606 GN=SLC35C2 PE=1 SV=2)	PF03151.16(TPT:Triose-phosphate Transporter family); PF00892.20(EamA:EamA-like transporter family); PF08449.11(UAA:UAA transporter family)
Pig.10492.1	Pig.10492	ADAR-201	LOW QUALITY PROTEIN: double-stranded RNA-specific adenosine deaminase [Sus scrofa]	11.09	12.5	13.62	6.55	5.61	8.02	37.79	48.49	20.05	GO:0003726(molecular_function:double-stranded RNA adenosine deaminase activity); GO:0003723(molecular_function:RNA binding); GO:0006396(biological_process:RNA processing)	K12968	ADAR, ADAR1	map04623(Cytosolic DNA-sensing pathway); map05164(Influenza A); map05162(Measles)	ENOG410XT0Z(U:Intracellular trafficking, secretion, and vesicular transport)	XP_020945415.1(LOW QUALITY PROTEIN: double-stranded RNA-specific adenosine deaminase [Sus scrofa])	sp|P55265|DSRAD_HUMAN(Double-stranded RNA-specific adenosine deaminase OS=Homo sapiens OX=9606 GN=ADAR PE=1 SV=4)	PF02137.18(A_deamin:Adenosine-deaminase (editase) domain); PF02295.17(z-alpha:Adenosine deaminase z-alpha domain); PF00035.26(dsrm:Double-stranded RNA binding motif); PF01978.19(TrmB:Sugar-specific transcriptional regulator TrmB)
Pig.05641.1	Pig.05641	EPB41L4A-203	PREDICTED: band 4.1-like protein 4A-like, partial [Physeter catodon]	3.61	3.19	5.25	1.14	0.95	0.96	8.88	16.02	9.64	GO:0005856(cellular_component:cytoskeleton); GO:0008092(molecular_function:cytoskeletal protein binding)				ENOG410XSWH(S:Function unknown); ENOG410XRF6(S:Function unknown)	ELK11560.1(Band 4.1-like protein 4A [Pteropus alecto])	sp|Q9HCS5|E41LA_HUMAN(Band 4.1-like protein 4A OS=Homo sapiens OX=9606 GN=EPB41L4A PE=1 SV=2)
Pig.12516.1	Pig.12516	TFB2M-201	dimethyladenosine transferase 2, mitochondrial isoform X1 [Sus scrofa]	2.66	2.07	3.51	1.47	1.13	0.67	0.74	0.75	0.69	GO:0000179(molecular_function:rRNA (adenine-N6,N6-)-dimethyltransferase activity); GO:0003712(molecular_function:transcription cofactor activity); GO:0005739(cellular_component:mitochondrion); GO:0006355(biological_process:regulation of transcription, DNA-templated); GO:0003723(molecular_function:RNA binding); GO:0006391(biological_process:transcription initiation from mitochondrial promoter); GO…	K17653	TFB2M		COG0030(J:Translation, ribosomal structure and biogenesis)	QCQ84354.1(mitochondrial transcription factor B2 [Sus scrofa])	sp|Q32LD4|TFB2M_BOVIN(Dimethyladenosine transferase 2, mitochondrial OS=Bos taurus OX=9913 GN=TFB2M PE=2 SV=1)	PF00398.20(RrnaAD:Ribosomal RNA adenine dimethylase)
MSTRG.40931.1	MSTRG.40931			661.65	628.96	556.86	386.86	361.34	354.87	1101.54	1376.9	1287.82	GO:0000413(biological_process:protein peptidyl-prolyl isomerization); GO:0006457(biological_process:protein folding); GO:0005829(cellular_component:cytosol); GO:0045069(biological_process:regulation of viral genome replication); GO:0051082(molecular_function:unfolded protein binding); GO:0005576(cellular_component:extracellular region); GO:0042026(biological_process:protein refolding); GO:0003755…	K03767	PPIA	map04217(Necroptosis)	COG0652(A:RNA processing and modification)	XP_020725967.1(peptidyl-prolyl cis-trans isomerase A-like [Odocoileus virginianus texanus])	sp|P62935|PPIA_BOVIN(Peptidyl-prolyl cis-trans isomerase A OS=Bos taurus OX=9913 GN=PPIA PE=1 SV=2)	PF00160.21(Pro_isomerase:Cyclophilin type peptidyl-prolyl cis-trans isomerase/CLD)
Pig.09752.1	Pig.09752	SLC22A17-201	PREDICTED: solute carrier family 22 member 17 isoform X2 [Ovis aries musimon]	1.95	2.53	2.05	1.51	1.18	1.15	11.27	15.98	8.04		K08213	SLC22A17		ENOG411129W(U:Intracellular trafficking, secretion, and vesicular transport)	XP_026966624.1(solute carrier family 22 member 17 isoform X3 [Lagenorhynchus obliquidens])	sp|Q3SZQ2|S22AH_BOVIN(Solute carrier family 22 member 17 OS=Bos taurus OX=9913 GN=SLC22A17 PE=2 SV=1)	PF00083.24(Sugar_tr:Sugar (and other) transporter); PF07690.16(MFS_1:Major Facilitator Superfamily)
Pig.22153.1	Pig.22153	TMEM240-201	transmembrane protein 240 isoform X2 [Sus scrofa]	0.2	0.77	0.2	0.07	0.18	0.13	0.47	0	0.5	GO:0097060(cellular_component:synaptic membrane); GO:0016021(cellular_component:integral component of membrane); GO:0030054(cellular_component:cell junction)				ENOG4110ENY(S:Function unknown)	XP_020953116.1(transmembrane protein 240 isoform X2 [Sus scrofa])	sp|Q5SV17|TM240_HUMAN(Transmembrane protein 240 OS=Homo sapiens OX=9606 GN=TMEM240 PE=1 SV=2)	PF15207.6(TMEM240:TMEM240 family)
Pig.12167.1	Pig.12167	ZBTB44-201	zinc finger and BTB domain-containing protein 44 isoform X1 [Sus scrofa]	25.66	25.28	25.91	22.3	19.77	25.14	18.42	24.38	25.57	GO:0003676(molecular_function:nucleic acid binding)	K10515	ZBTB44, BTBD15		COG5048(S:Function unknown)	XP_003130128.1(zinc finger and BTB domain-containing protein 44 isoform X1 [Sus scrofa])	sp|Q8NCP5|ZBT44_HUMAN(Zinc finger and BTB domain-containing protein 44 OS=Homo sapiens OX=9606 GN=ZBTB44 PE=1 SV=1)	PF00651.31(BTB:BTB/POZ domain); PF00096.26(zf-C2H2:Zinc finger, C2H2 type); PF13894.6(zf-C2H2_4:C2H2-type zinc finger); PF13465.6(zf-H2C2_2:Zinc-finger double domain); PF12874.7(zf-met:Zinc-finger of C2H2 type); PF13912.6(zf-C2H2_6:C2H2-type zinc finger); PF16622.5(zf-C2H2_11:zinc-finger C2H2-type)
Pig.00753.1	Pig.00753	CD164-202	sialomucin core protein 24 isoform X1 [Sus scrofa]	203.38	157.43	194.02	60.95	46.23	60.19	261.85	276.88	236.7	GO:0031410(cellular_component:cytoplasmic vesicle); GO:0016021(cellular_component:integral component of membrane); GO:0005764(cellular_component:lysosome); GO:0005886(cellular_component:plasma membrane); GO:0007157(biological_process:heterophilic cell-cell adhesion via plasma membrane cell adhesion molecules); GO:0005768(cellular_component:endosome)	K06546	CD164, MGC24	map04142(Lysosome)	ENOG410XVJX(U:Intracellular trafficking, secretion, and vesicular transport)	XP_001924661.2(sialomucin core protein 24 isoform X1 [Sus scrofa])	sp|Q04900|MUC24_HUMAN(Sialomucin core protein 24 OS=Homo sapiens OX=9606 GN=CD164 PE=1 SV=2)	PF05283.11(MGC-24:Multi-glycosylated core protein 24 (MGC-24), sialomucin)
Pig.10466.1	Pig.10466	Arf1	ADP-ribosylation factor 1 isoform X1 [Sus scrofa]	1.19	1.28	1.53	1.11	0.78	0.37	2.8	1.75	2.2	GO:0016021(cellular_component:integral component of membrane); GO:0005525(molecular_function:GTP binding)	K07937	ARF1	map04072(Phospholipase D signaling pathway); map04144(Endocytosis); map05110(Vibrio cholerae infection); map05134(Legionellosis)	COG1100(S:Function unknown)	XP_020932893.1(ADP-ribosylation factor 1 isoform X1 [Sus scrofa])	sp|P84080|ARF1_BOVIN(ADP-ribosylation factor 1 OS=Bos taurus OX=9913 GN=ARF1 PE=1 SV=2)	PF00025.21(Arf:ADP-ribosylation factor family)
Pig.12664.1	Pig.12664	CCDC24-202	coiled-coil domain-containing protein 24 isoform X2 [Sus scrofa]	0.04	0.04	0.18	0.21	0.11	0.39	1.38	1.03	2.29					ENOG41125IY(S:Function unknown)	XP_020952486.1(coiled-coil domain-containing protein 24 isoform X2 [Sus scrofa])	sp|Q8N4L8|CCD24_HUMAN(Coiled-coil domain-containing protein 24 OS=Homo sapiens OX=9606 GN=CCDC24 PE=1 SV=1)	PF15669.5(CCDC24:Coiled-coil domain-containing protein 24 family)
Pig.06336.1	Pig.06336	ISYNA1-201	PREDICTED: inositol-3-phosphate synthase 1 [Vicugna pacos]	2.8	1.87	1.96	4.31	2.47	2.44	2.99	5.38	2.68	GO:0005737(cellular_component:cytoplasm); GO:0004512(molecular_function:inositol-3-phosphate synthase activity); GO:0006021(biological_process:inositol biosynthetic process); GO:0008654(biological_process:phospholipid biosynthetic process)	K01858	INO1, ISYNA1	map00562(Inositol phosphate metabolism)	COG1260(I:Lipid transport and metabolism)	TKC50072.1(hypothetical protein EI555_001154, partial [Monodon monoceros])	sp|Q2NL29|INO1_BOVIN(Inositol-3-phosphate synthase 1 OS=Bos taurus OX=9913 GN=ISYNA1 PE=2 SV=1)	PF07994.12(NAD_binding_5:Myo-inositol-1-phosphate synthase); PF01658.17(Inos-1-P_synth:Myo-inositol-1-phosphate synthase)
MSTRG.13535.2	MSTRG.13535			7.7	9.03	6.28	4.1	4.74	4.69	21.08	27.44	26.77	GO:0000122(biological_process:negative regulation of transcription from RNA polymerase II promoter); GO:0003677(molecular_function:DNA binding); GO:0005654(cellular_component:nucleoplasm); GO:0021882(biological_process:regulation of transcription from RNA polymerase II promoter involved in forebrain neuron fate commitment); GO:0071565(cellular_component:nBAF complex); GO:0071564(cellular_componen…	K11649	SMARCC	map05225(Hepatocellular carcinoma); map04714(Thermogenesis)	COG5259(B:Chromatin structure and dynamics); COG5259(K:Transcription)	ELV12041.1(SWI/SNF complex subunit SMARCC2 [Tupaia chinensis])	sp|Q8TAQ2|SMRC2_HUMAN(SWI/SNF complex subunit SMARCC2 OS=Homo sapiens OX=9606 GN=SMARCC2 PE=1 SV=1)	PF16495.5(SWIRM-assoc_1:SWIRM-associated region 1); PF16498.5(SWIRM-assoc_3:SWIRM-associated domain at the C-terminal); PF00249.31(Myb_DNA-binding:Myb-like DNA-binding domain); PF13921.6(Myb_DNA-bind_6:Myb-like DNA-binding domain)
Pig.04848.1	Pig.04848	AAK1-205	AP2-associated protein kinase 1 [Sus scrofa]	6.57	7.69	6.64	2.79	2.12	2.72	11.75	21.37	16.12	GO:0005524(molecular_function:ATP binding); GO:0004672(molecular_function:protein kinase activity)	K08853	AAK		ENOG41119UW(S:Function unknown)	XP_020943070.1(AP2-associated protein kinase 1 [Sus scrofa])	sp|Q6ZSR9|YJ005_HUMAN(Uncharacterized protein FLJ45252 OS=Homo sapiens OX=9606 PE=2 SV=2)	PF15282.6(BMP2K_C:BMP-2-inducible protein kinase C-terminus)
Pig.20939.1	Pig.20939	EHMT2-201	histone-lysine N-methyltransferase EHMT1 isoform X3 [Sus scrofa]	6.08	9.69	7.95	4.37	4.09	4.26	15.15	20.29	19.44		K11420	EHMT	map00310(Lysine degradation); map04211(Longevity regulating pathway)	COG2940(S:Function unknown)	XP_020936858.1(histone-lysine N-methyltransferase EHMT1 isoform X3 [Sus scrofa])	sp|Q9H9B1|EHMT1_HUMAN(Histone-lysine N-methyltransferase EHMT1 OS=Homo sapiens OX=9606 GN=EHMT1 PE=1 SV=4)	PF12796.7(Ank_2:Ankyrin repeats (3 copies)); PF13637.6(Ank_4:Ankyrin repeats (many copies)); PF13606.6(Ank_3:Ankyrin repeat); PF00023.30(Ank:Ankyrin repeat); PF13857.6(Ank_5:Ankyrin repeats (many copies))
Pig.09034.1	Pig.09034	ASAP2-202	arf-GAP with SH3 domain, ANK repeat and PH domain-containing protein 2 isoform X4 [Sus scrofa]	5.35	7.47	5.61	5.28	5.26	5.19	9.22	14.52	11.55	GO:0046872(molecular_function:metal ion binding); GO:0005096(molecular_function:GTPase activator activity)	K12488	ASAP	map04666(Fc gamma R-mediated phagocytosis); map04144(Endocytosis)	COG5347(S:Function unknown)	XP_020943525.1(arf-GAP with SH3 domain, ANK repeat and PH domain-containing protein 2 isoform X4 [Sus scrofa])	sp|O43150|ASAP2_HUMAN(Arf-GAP with SH3 domain, ANK repeat and PH domain-containing protein 2 OS=Homo sapiens OX=9606 GN=ASAP2 PE=1 SV=3)	PF01412.18(ArfGap:Putative GTPase activating protein for Arf); PF16746.5(BAR_3:BAR domain of APPL family); PF12796.7(Ank_2:Ankyrin repeats (3 copies)); PF00169.29(PH:PH domain); PF14604.6(SH3_9:Variant SH3 domain); PF00018.28(SH3_1:SH3 domain); PF07653.17(SH3_2:Variant SH3 domain); PF00023.30(Ank:Ankyrin repeat); PF13857.6(Ank_5:Ankyrin repeats (many copies)); PF13637.6(Ank_4:Ankyrin repeats (man…
Pig.15471.1	Pig.15471	PALD1-201	LOW QUALITY PROTEIN: paladin [Sus scrofa]	0.69	0.86	0.48	0.58	0.42	0.48	4.86	6.15	4.48					ENOG410YSN6(S:Function unknown)	XP_020929449.1(LOW QUALITY PROTEIN: paladin [Sus scrofa])	sp|Q9ULE6|PALD_HUMAN(Paladin OS=Homo sapiens OX=9606 GN=PALD1 PE=1 SV=3)	PF14566.6(PTPlike_phytase:Inositol hexakisphosphate)
Pig.14868.1	Pig.14868	BTBD18-201	BTB/POZ domain-containing protein 18 [Sus scrofa]	0	0	0	0.01	0	0	0	0	0					ENOG410Y41A(S:Function unknown)	XP_003122806.1(BTB/POZ domain-containing protein 18 [Sus scrofa])	sp|B2RXH4|BTBDI_HUMAN(BTB/POZ domain-containing protein 18 OS=Homo sapiens OX=9606 GN=BTBD18 PE=2 SV=1)	PF00651.31(BTB:BTB/POZ domain)
Pig.08874.1	Pig.08874	SEL1L-201	protein sel-1 homolog 1 isoform X1 [Sus scrofa]	97.56	79.45	81.44	36.77	32.99	42.41	35.33	40.83	42.09	GO:0006641(biological_process:triglyceride metabolic process); GO:0009306(biological_process:protein secretion); GO:0016021(cellular_component:integral component of membrane); GO:0030970(biological_process:retrograde protein transport, ER to cytosol); GO:0000839(cellular_component:Hrd1p ubiquitin ligase ERAD-L complex); GO:0036513(cellular_component:Derlin-1 retrotranslocation complex)	K14026	SEL1, SEL1L	map04141(Protein processing in endoplasmic reticulum)	COG0790(S:Function unknown)	XP_020955243.1(protein sel-1 homolog 1 isoform X1 [Sus scrofa])	sp|Q9UBV2|SE1L1_HUMAN(Protein sel-1 homolog 1 OS=Homo sapiens OX=9606 GN=SEL1L PE=1 SV=3)	PF08238.12(Sel1:Sel1 repeat); PF00040.19(fn2:Fibronectin type II domain)
Pig.06884.1	Pig.06884	ZNF202-201	zinc finger protein 202 isoform X1 [Sus scrofa]	0.95	1.12	1.32	1.64	1.25	1.56	2.57	4.29	3.79	GO:0001227(molecular_function:transcriptional repressor activity, RNA polymerase II transcription regulatory region sequence-specific binding); GO:0003700(molecular_function:transcription factor activity, sequence-specific DNA binding); GO:0005634(cellular_component:nucleus); GO:0005654(cellular_component:nucleoplasm); GO:0003676(molecular_function:nucleic acid binding); GO:0000978(molecular_func…	K09229	ZKSCAN		COG5048(U:Intracellular trafficking, secretion, and vesicular transport)	XP_003357384.1(zinc finger protein 202 isoform X1 [Sus scrofa])	sp|O95125|ZN202_HUMAN(Zinc finger protein 202 OS=Homo sapiens OX=9606 GN=ZNF202 PE=1 SV=4)	PF02023.17(SCAN:SCAN domain); PF00096.26(zf-C2H2:Zinc finger, C2H2 type); PF13465.6(zf-H2C2_2:Zinc-finger double domain); PF13894.6(zf-C2H2_4:C2H2-type zinc finger); PF01352.27(KRAB:KRAB box); PF13912.6(zf-C2H2_6:C2H2-type zinc finger)
Pig.23278.1	Pig.23278	SMIM15-201	PREDICTED: small integral membrane protein 15 [Chrysemys picta bellii]	8.44	15.79	6.78	2.42	4.49	3.91	4.76	6.68	5.44	GO:0016021(cellular_component:integral component of membrane)				ENOG410XUYP(S:Function unknown)	XP_003925865.1(PREDICTED: small integral membrane protein 15 [Saimiri boliviensis boliviensis])	sp|Q7Z3B0|SIM15_HUMAN(Small integral membrane protein 15 OS=Homo sapiens OX=9606 GN=SMIM15 PE=3 SV=1)	PF15086.6(UPF0542:Uncharacterised protein family UPF0542)
Pig.15390.1	Pig.15390	HIST1H1D-201	PREDICTED: LOW QUALITY PROTEIN: histone H1.3-like [Camelus bactrianus]	97.81	70.07	130.19	55.21	60.8	74.97	202.15	207.03	120.3	GO:0031936(biological_process:negative regulation of chromatin silencing); GO:0016584(biological_process:nucleosome positioning); GO:0005719(cellular_component:nuclear euchromatin); GO:0031490(molecular_function:chromatin DNA binding); GO:0006334(biological_process:nucleosome assembly); GO:0003677(molecular_function:DNA binding); GO:0030261(biological_process:chromosome condensation); GO:0006355(…	K11275	H1_5		ENOG4112541(B:Chromatin structure and dynamics)	NP_001026962.1(histone H1.3-like protein [Sus scrofa])	sp|A7MAZ5|H13_BOVIN(Histone H1.3 OS=Bos taurus OX=9913 GN=HIST1H1D PE=1 SV=1)	PF00538.19(Linker_histone:linker histone H1 and H5 family)
Pig.11198.1	Pig.11198	BCAS3-201	PREDICTED: breast carcinoma-amplified sequence 3-like isoform X1 [Marmota marmota marmota]	3.61	3.73	2.77	0.79	1.52	1.86	6.62	5.68	8.14	GO:0042393(molecular_function:histone binding); GO:0035148(biological_process:tube formation); GO:0048487(molecular_function:beta-tubulin binding); GO:0031252(cellular_component:cell leading edge); GO:0071944(cellular_component:cell periphery); GO:0042594(biological_process:response to starvation); GO:0001525(biological_process:angiogenesis); GO:0043085(biological_process:positive regulation of c…				ENOG410XSW7(S:Function unknown)	XP_007531538.1(PREDICTED: breast carcinoma-amplified sequence 3 isoform X1 [Erinaceus europaeus])	sp|Q9H6U6|BCAS3_HUMAN(Breast carcinoma-amplified sequence 3 OS=Homo sapiens OX=9606 GN=BCAS3 PE=1 SV=3)
Pig.04306.1	Pig.04306	MPP5-201	MAGUK p55 subfamily member 5 isoform X1 [Sus scrofa]	14.2	13.43	12.1	6.96	5.45	7.66	8.06	8.17	10.19	GO:0005737(cellular_component:cytoplasm); GO:0032287(biological_process:peripheral nervous system myelin maintenance); GO:0043219(cellular_component:lateral loop); GO:0032991(cellular_component:macromolecular complex); GO:0035749(cellular_component:myelin sheath adaxonal region); GO:0090162(biological_process:establishment of epithelial cell polarity); GO:0070830(biological_process:bicellular tig…	K06091	MPP5, PALS1	map04530(Tight junction); map05165(Human papillomavirus infection); map04390(Hippo signaling pathway); map04391(Hippo signaling pathway - fly)	COG0194(C:Energy production and conversion)	XP_003356786.2(MAGUK p55 subfamily member 5 isoform X1 [Sus scrofa])	sp|Q8N3R9|MPP5_HUMAN(MAGUK p55 subfamily member 5 OS=Homo sapiens OX=9606 GN=MPP5 PE=1 SV=3)	PF00625.21(Guanylate_kin:Guanylate kinase); PF09060.10(L27_N:L27_N); PF07653.17(SH3_2:Variant SH3 domain); PF00595.24(PDZ:PDZ domain); PF17820.1(PDZ_6:PDZ domain); PF02828.16(L27:L27 domain); PF00018.28(SH3_1:SH3 domain); PF13180.6(PDZ_2:PDZ domain); PF14604.6(SH3_9:Variant SH3 domain)
Pig.14263.1	Pig.14263	TSNAXIP1-201	translin-associated factor X-interacting protein 1 isoform X1 [Sus scrofa]	0.03	0.03	0	0.01	0.01	0.01	0	0.04	0.09	GO:0005737(cellular_component:cytoplasm)				ENOG410XQRR(A:RNA processing and modification)	XP_003126971.1(translin-associated factor X-interacting protein 1 isoform X1 [Sus scrofa])	sp|Q2TAA8|TXIP1_HUMAN(Translin-associated factor X-interacting protein 1 OS=Homo sapiens OX=9606 GN=TSNAXIP1 PE=2 SV=1)	PF15739.5(TSNAXIP1_N:Translin-associated factor X-interacting N-terminus)
Pig.11758.1	Pig.11758	CPA5	NR:NA	2.25	4.45	12.23	11.01	11.58	4.23	10	20.08	33.13						XP_020954391.1(cullin-7 isoform X1 [Sus scrofa])
Pig.15770.1	Pig.15770	DENND2C-201	PREDICTED: DENN domain-containing protein 2C [Rhinolophus sinicus]	0.57	0.91	0.47	0.52	0.24	0.39	1.55	2.93	2.32		K20161	DENND2		ENOG410XT3N(K:Transcription)	XP_005204089.1(DENN domain-containing protein 2C isoform X3 [Bos taurus])	sp|Q68D51|DEN2C_HUMAN(DENN domain-containing protein 2C OS=Homo sapiens OX=9606 GN=DENND2C PE=1 SV=2)	PF02141.21(DENN:DENN (AEX-3) domain); PF03456.18(uDENN:uDENN domain)
Pig.03295.1	Pig.03295	GLIS3-201	zinc finger protein GLIS3 isoform X1 [Sus scrofa]	2.38	3.35	3.46	3.97	2.76	3.05	4.88	6.74	6.21	GO:0005634(cellular_component:nucleus); GO:0006357(biological_process:regulation of transcription from RNA polymerase II promoter); GO:0003676(molecular_function:nucleic acid binding)	K09232	GLIS1_3		COG5048(S:Function unknown)	XP_020930038.1(zinc finger protein GLIS3 isoform X1 [Sus scrofa])	sp|Q8NEA6|GLIS3_HUMAN(Zinc finger protein GLIS3 OS=Homo sapiens OX=9606 GN=GLIS3 PE=2 SV=5)	PF00096.26(zf-C2H2:Zinc finger, C2H2 type); PF13465.6(zf-H2C2_2:Zinc-finger double domain); PF13894.6(zf-C2H2_4:C2H2-type zinc finger)
Pig.07287.1	Pig.07287	DTWD2-201	DTW domain-containing protein 2 isoform X3 [Sus scrofa]	2.17	1.26	1.43	1.52	1.27	1.4	2.63	3.06	4.31					COG3148(S:Function unknown)	XP_020940322.1(DTW domain-containing protein 2 isoform X3 [Sus scrofa])	sp|Q4R7M4|DTWD2_MACFA(DTW domain-containing protein 2 OS=Macaca fascicularis OX=9541 GN=DTWD2 PE=2 SV=1)	PF03942.15(DTW:DTW domain)
MSTRG.4160.1	MSTRG.4160			1.07	0.74	1.43	1.53	1.18	1.31	0.98	1.66	1.38	GO:0003964(molecular_function:RNA-directed DNA polymerase activity); GO:0004519(molecular_function:endonuclease activity)				ENOG410Y65V(S:Function unknown)	ABR01162.1(endonuclease/reverse transcriptase [Sus scrofa])	sp|O00370|LORF2_HUMAN(LINE-1 retrotransposable element ORF2 protein OS=Homo sapiens OX=9606 PE=1 SV=1)	PF08333.11(DUF1725:Protein of unknown function (DUF1725)); PF00078.27(RVT_1:Reverse transcriptase (RNA-dependent DNA polymerase)); PF01304.17(Gas_vesicle_C:Gas vesicles protein GVPc repeated domain)
Pig.20309.1	Pig.20309	NFATC1-203	nuclear factor of activated T-cells, cytoplasmic 1 [Sus scrofa]	6.47	8.01	7.28	4.97	6.16	6.88	11.76	17.68	19.5	GO:0033173(biological_process:calcineurin-NFAT signaling cascade); GO:0003700(molecular_function:transcription factor activity, sequence-specific DNA binding); GO:0008134(molecular_function:transcription factor binding); GO:0005634(cellular_component:nucleus); GO:0001816(biological_process:cytokine production); GO:0044798(cellular_component:nuclear transcription factor complex); GO:0045944(biolog…	K04446	NFATC1, NFAT2, NFATC	map05166(Human T-cell leukemia virus 1 infection); map04024(cAMP signaling pathway); map04650(Natural killer cell mediated cytotoxicity); map04662(B cell receptor signaling pathway); map05163(Human cytomegalovirus infection); map04660(T cell receptor signaling pathway); map05161(Hepatitis B); map05321(Inflammatory bowel disease (IBD)); map04659(Th17 cell differentiation); map04658(Th1 and Th2 cel…	ENOG41105U2(S:Function unknown)	NP_999326.1(nuclear factor of activated T-cells, cytoplasmic 1 [Sus scrofa])	sp|O77638|NFAC1_PIG(Nuclear factor of activated T-cells, cytoplasmic 1 OS=Sus scrofa OX=9823 GN=NFATC1 PE=2 SV=2)	PF00554.22(RHD_DNA_bind:Rel homology DNA-binding domain); PF16179.5(RHD_dimer:Rel homology dimerisation domain); PF01833.24(TIG:IPT/TIG domain)
Pig.13936.1	Pig.13936	DNAH6-201	dynein heavy chain 6, axonemal isoform X1 [Sus scrofa]	0	0.01	0	0.01	0.01	0.01	0	0	0	GO:0030286(cellular_component:dynein complex); GO:0007018(biological_process:microtubule-based movement); GO:0003777(molecular_function:microtubule motor activity); GO:0005524(molecular_function:ATP binding)	K10408	DNAH	map05016(Huntington disease)		XP_020942964.1(dynein heavy chain 6, axonemal isoform X1 [Sus scrofa])	sp|Q9C0G6|DYH6_HUMAN(Dynein heavy chain 6, axonemal OS=Homo sapiens OX=9606 GN=DNAH6 PE=2 SV=3)	PF12774.7(AAA_6:Hydrolytic ATP binding site of dynein motor region); PF08393.13(DHC_N2:Dynein heavy chain, N-terminal region 2); PF12775.7(AAA_7:P-loop containing dynein motor region); PF17852.1(Dynein_AAA_lid:Dynein heavy chain AAA lid domain); PF07728.14(AAA_5:AAA domain (dynein-related subfamily)); PF02367.17(TsaE:Threonylcarbamoyl adenosine biosynthesis protein TsaE)
Pig.21021.1	Pig.21021	LOC101143204	putative MORF4 family-associated protein 1-like protein UPP [Sus scrofa]	0.92	0.72	0.73	0	0	0.25	0.52	0.23	1.65					ENOG41117Q2(S:Function unknown); ENOG41119KB(Z:Cytoskeleton)	XP_005656545.2(putative MORF4 family-associated protein 1-like protein UPP [Sus scrofa])	sp|B2RBV5|MRUPP_HUMAN(Putative MORF4 family-associated protein 1-like protein UPP OS=Homo sapiens OX=9606 PE=1 SV=1)	PF15155.6(MRFAP1:MORF4 family-associated protein1)
Pig.09782.1	Pig.09782	RIBC1-201	RIB43A-like with coiled-coils protein 1 isoform X1 [Sus scrofa]	0.05	0.08	0	0.05	0.03	0.02	0.68	0.39	0.46					ENOG410YKAG(J:Translation, ribosomal structure and biogenesis)	XP_020936267.1(RIB43A-like with coiled-coils protein 1 isoform X1 [Sus scrofa])	sp|Q0VC09|RIBC1_BOVIN(RIB43A-like with coiled-coils protein 1 OS=Bos taurus OX=9913 GN=RIBC1 PE=2 SV=1)	PF05914.12(RIB43A:RIB43A)
Pig.04322.1	Pig.04322	ACTN1-201	PREDICTED: alpha-actinin-1 [Manacus vitellinus]	4.07	6.55	4.66	2.98	2.08	2.07	6.57	7.67	5.39	GO:0017166(molecular_function:vinculin binding); GO:0005911(cellular_component:cell-cell junction); GO:0030220(biological_process:platelet formation); GO:0051639(biological_process:actin filament network formation); GO:0005903(cellular_component:brush border); GO:0048041(biological_process:focal adhesion assembly); GO:0042383(cellular_component:sarcolemma); GO:0044325(molecular_function:ion chann…	K05699	ACTN1_4	map04510(Focal adhesion); map04810(Regulation of actin cytoskeleton); map05146(Amoebiasis); map05322(Systemic lupus erythematosus); map04670(Leukocyte transendothelial migration); map04530(Tight junction); map05203(Viral carcinogenesis); map04520(Adherens junction)	COG5069(S:Function unknown)	AAA48570.1(alpha-actinin [Gallus gallus])	sp|Q3B7N2|ACTN1_BOVIN(Alpha-actinin-1 OS=Bos taurus OX=9913 GN=ACTN1 PE=2 SV=1)	PF00307.31(CH:Calponin homology (CH) domain)
MSTRG.22706.1	MSTRG.22706			52.13	80.2	33.52	1.91	1.94	0	4.73	7.37	1.51	GO:0008083(molecular_function:growth factor activity); GO:0008009(molecular_function:chemokine activity); GO:0006952(biological_process:defense response); GO:0006954(biological_process:inflammatory response); GO:0006955(biological_process:immune response); GO:0005615(cellular_component:extracellular space)	K05505	CXCL1_2_3, GRO	map05167(Kaposi sarcoma-associated herpesvirus infection); map04657(IL-17 signaling pathway); map04668(TNF signaling pathway); map05134(Legionellosis); map04621(NOD-like receptor signaling pathway); map05132(Salmonella infection); map04060(Cytokine-cytokine receptor interaction); map04062(Chemokine signaling pathway)	ENOG410ZT1C(S:Function unknown)	XP_004766405.1(PREDICTED: growth-regulated alpha protein-like, partial [Mustela putorius furo])	sp|P09340|GROA_CRIGR(Growth-regulated alpha protein OS=Cricetulus griseus OX=10029 GN=CXCL1 PE=3 SV=1)
Pig.18577.1	Pig.18577	KRT27-201	keratin, type I cytoskeletal 27 [Sus scrofa]	0.03	0.08	0	0	0	0	0	0	0	GO:0005882(cellular_component:intermediate filament); GO:0031069(biological_process:hair follicle morphogenesis); GO:0005198(molecular_function:structural molecule activity)	K07604	KRT1	map04915(Estrogen signaling pathway)	ENOG410Y9IV(Z:Cytoskeleton)	NP_001231551.1(keratin, type I cytoskeletal 27 [Sus scrofa])	sp|Q6R649|K1C27_CAPHI(Keratin, type I cytoskeletal 27 OS=Capra hircus OX=9925 GN=KRT27 PE=2 SV=1)	PF00038.21(Filament:Intermediate filament protein)
Pig.23011.1	Pig.23011	SCCPDH	saccharopine dehydrogenase-like oxidoreductase [Sus scrofa]	0	0	0	0	0.07	0.12	0.06	0.07	0.18	GO:0016021(cellular_component:integral component of membrane); GO:0005811(cellular_component:lipid particle); GO:0030496(cellular_component:midbody); GO:0016491(molecular_function:oxidoreductase activity)				COG3268(S:Function unknown)	XP_020919924.1(saccharopine dehydrogenase-like oxidoreductase [Sus scrofa])	sp|Q3T067|SCPDL_BOVIN(Saccharopine dehydrogenase-like oxidoreductase OS=Bos taurus OX=9913 GN=SCCPDH PE=2 SV=1)
Pig.08519.1	Pig.08519	KLHL21-201	kelch-like protein 21 [Sus scrofa]	6.59	6.88	5.93	2.55	2.91	4.35	5.05	7.97	12.95	GO:0005737(cellular_component:cytoplasm); GO:0005827(cellular_component:polar microtubule); GO:0016567(biological_process:protein ubiquitination); GO:0051301(biological_process:cell division); GO:0035853(biological_process:chromosome passenger complex localization to spindle midzone); GO:0032465(biological_process:regulation of cytokinesis); GO:0031463(cellular_component:Cul3-RING ubiquitin ligas…	K10458	KLHL21		ENOG410XNX8(S:Function unknown)	XP_005656066.2(kelch-like protein 21 [Sus scrofa])	sp|Q08DS0|KLH21_BOVIN(Kelch-like protein 21 OS=Bos taurus OX=9913 GN=KLHL21 PE=2 SV=1)	PF01344.25(Kelch_1:Kelch motif); PF13964.6(Kelch_6:Kelch motif); PF00651.31(BTB:BTB/POZ domain); PF07707.15(BACK:BTB And C-terminal Kelch); PF13415.6(Kelch_3:Galactose oxidase, central domain); PF07646.15(Kelch_2:Kelch motif); PF13418.6(Kelch_4:Galactose oxidase, central domain)
Pig.19339.1	Pig.19339	CTPS1-201	CTP synthase 1 [Sus scrofa]	0.89	1.37	1.16	0.42	0.47	0.36	2.68	3.7	2.61	GO:0005737(cellular_component:cytoplasm); GO:0044210(biological_process:'de novo' CTP biosynthetic process); GO:0019856(biological_process:pyrimidine nucleobase biosynthetic process); GO:0042098(biological_process:T cell proliferation); GO:0006541(biological_process:glutamine metabolic process); GO:0042100(biological_process:B cell proliferation); GO:0006241(biological_process:CTP biosynthetic pr…	K01937	pyrG, CTPS	map00240(Pyrimidine metabolism)	COG0504(F:Nucleotide transport and metabolism)	XP_003128153.1(CTP synthase 1 [Sus scrofa])	sp|P70698|PYRG1_MOUSE(CTP synthase 1 OS=Mus musculus OX=10090 GN=Ctps1 PE=1 SV=2)	PF06418.14(CTP_synth_N:CTP synthase N-terminus); PF00117.28(GATase:Glutamine amidotransferase class-I); PF07722.13(Peptidase_C26:Peptidase C26)
Pig.03289.1	Pig.03289	NDUFB5-202	PREDICTED: NADH dehydrogenase [ubiquinone]	0	0	0	0	0.07	0	0	0	0	GO:0005654(cellular_component:nucleoplasm); GO:0016021(cellular_component:integral component of membrane); GO:0005747(cellular_component:mitochondrial respiratory chain complex I); GO:0055114(biological_process:oxidation-reduction process); GO:0032981(biological_process:mitochondrial respiratory chain complex I assembly)	K03961	NDUFB5	map00190(Oxidative phosphorylation); map05012(Parkinson disease); map05010(Alzheimer disease); map04723(Retrograde endocannabinoid signaling); map05016(Huntington disease); map04714(Thermogenesis); map04932(Non-alcoholic fatty liver disease (NAFLD))	ENOG4111HCK(U:Intracellular trafficking, secretion, and vesicular transport)	NP_788829.1(NADH dehydrogenase [ubiquinone] 1 beta subcomplex subunit 5, mitochondrial precursor [Bos taurus])	sp|Q02380|NDUB5_BOVIN(NADH dehydrogenase [ubiquinone] 1 beta subcomplex subunit 5, mitochondrial OS=Bos taurus OX=9913 GN=NDUFB5 PE=1 SV=1)	PF09781.9(NDUF_B5:NADH:ubiquinone oxidoreductase, NDUFB5/SGDH subunit)
Pig.04699.1	Pig.04699	KIAA1614-201	PREDICTED: uncharacterized protein KIAA1614 homolog [Tursiops truncatus]	0.15	0.2	0.25	0.19	0.18	0.18	2.55	3.39	2.87					ENOG411288M(S:Function unknown)	XP_020919415.1(uncharacterized protein KIAA1614 homolog [Sus scrofa])	sp|Q5VZ46|K1614_HUMAN(Uncharacterized protein KIAA1614 OS=Homo sapiens OX=9606 GN=KIAA1614 PE=2 SV=3)	PF15737.5(DUF4685:Domain of unknown function (DUF4685)); PF00595.24(PDZ:PDZ domain); PF17820.1(PDZ_6:PDZ domain)
Pig.17023.1	Pig.17023	MICALL1-201	PREDICTED: MICAL-like protein 1 [Orcinus orca]	1.35	1.82	2.08	0.97	1.14	1.38	8.8	13.3	8.82	GO:0046872(molecular_function:metal ion binding); GO:0017137(molecular_function:Rab GTPase binding); GO:0032456(biological_process:endocytic recycling); GO:0005623(cellular_component:cell)	K19948	MICALL1		COG5069(S:Function unknown)	XP_020947158.1(MICAL-like protein 1 [Sus scrofa])	sp|E1BBG2|MILK1_BOVIN(MICAL-like protein 1 OS=Bos taurus OX=9913 GN=MICALL1 PE=1 SV=2)	PF12130.8(DUF3585:Bivalent Mical/EHBP Rab binding domain); PF00307.31(CH:Calponin homology (CH) domain); PF11971.8(CAMSAP_CH:CAMSAP CH domain); PF00412.22(LIM:LIM domain)
Pig.02202.1	Pig.02202	CCDC68-201	coiled-coil domain-containing protein 68 [Sus scrofa]	1.17	0.87	1.96	0.09	0.08	0.2	0.31	2.13	1.09	GO:0035556(biological_process:intracellular signal transduction); GO:0008104(biological_process:protein localization); GO:0120103(cellular_component:centriolar subdistal appendage); GO:0034454(biological_process:microtubule anchoring at centrosome); GO:0005814(cellular_component:centriole)				ENOG4111MW9(S:Function unknown)	XP_001926397.4(coiled-coil domain-containing protein 68 [Sus scrofa])	sp|Q9H2F9|CCD68_HUMAN(Coiled-coil domain-containing protein 68 OS=Homo sapiens OX=9606 GN=CCDC68 PE=1 SV=1)
Pig.15739.1	Pig.15739	PCNX1-201	LOW QUALITY PROTEIN: pecanex-like protein 2 [Sus scrofa]	0	0	0.01	0.01	0.01	0.02	0.19	0.22	0.14	GO:0016021(cellular_component:integral component of membrane)				ENOG4111D2H(U:Intracellular trafficking, secretion, and vesicular transport)	XP_020929951.1(LOW QUALITY PROTEIN: pecanex-like protein 2 [Sus scrofa])	sp|A6NKB5|PCX2_HUMAN(Pecanex-like protein 2 OS=Homo sapiens OX=9606 GN=PCNX2 PE=2 SV=3)	PF05041.15(Pecanex_C:Pecanex protein (C-terminus))
Pig.12175.1	Pig.12175	NTM-201	neurotrimin isoform X9 [Sus scrofa]	0	0	0	0	0.06	0	0.5	1.7	2.25		K06774	HNT		ENOG4111SM8(S:Function unknown); ENOG410XPX0(S:Function unknown)	XP_020958011.1(neurotrimin isoform X7 [Sus scrofa])	sp|Q9P121|NTRI_HUMAN(Neurotrimin OS=Homo sapiens OX=9606 GN=NTM PE=1 SV=1)	PF13927.6(Ig_3:Immunoglobulin domain); PF07679.16(I-set:Immunoglobulin I-set domain); PF00047.25(ig:Immunoglobulin domain); PF13895.6(Ig_2:Immunoglobulin domain); PF16681.5(Ig_5:Ig-like domain on T-cell surface glycoprotein CD3 epsilon chain)
Pig.21643.1	Pig.21643	RPL3-201	PREDICTED: 60S ribosomal protein L3 [Vicugna pacos]	183.16	216.76	207.81	171.67	176.15	161.21	323.71	399.2	442.63	GO:0005840(cellular_component:ribosome); GO:0022625(cellular_component:cytosolic large ribosomal subunit); GO:0005829(cellular_component:cytosol); GO:0005730(cellular_component:nucleolus); GO:0071353(biological_process:cellular response to interleukin-4); GO:0003735(molecular_function:structural constituent of ribosome); GO:0006412(biological_process:translation); GO:0000027(biological_process:ri…	K02925	RP-L3e, RPL3	map03010(Ribosome)	COG0087(J:Translation, ribosomal structure and biogenesis)	NP_001230992.1(60S ribosomal protein L3 [Sus scrofa])	sp|P39023|RL3_HUMAN(60S ribosomal protein L3 OS=Homo sapiens OX=9606 GN=RPL3 PE=1 SV=2)	PF00297.22(Ribosomal_L3:Ribosomal protein L3)
Pig.07970.1	Pig.07970	LLGL2-202	lethal(2) giant larvae protein homolog 2 [Sus scrofa]	7.32	8.88	7.73	3.34	4.04	3.98	0.46	0.89	0.47					ENOG410XS6Z(S:Function unknown)	XP_020922285.1(lethal(2) giant larvae protein homolog 2 [Sus scrofa])	sp|Q6P1M3|L2GL2_HUMAN(Lethal(2) giant larvae protein homolog 2 OS=Homo sapiens OX=9606 GN=LLGL2 PE=1 SV=2)	PF08366.13(LLGL:LLGL2); PF00400.32(WD40:WD domain, G-beta repeat)
Pig.20844.1	Pig.20844	PPP1CA-202	serine/threonine-protein phosphatase PP1-alpha catalytic subunit isoform 1 [Homo sapiens]	28.35	34.94	26.04	21.71	24.47	22.8	42.83	59.09	57.31	GO:0032922(biological_process:circadian regulation of gene expression); GO:0043005(cellular_component:neuron projection); GO:0016791(molecular_function:phosphatase activity); GO:0016311(biological_process:dephosphorylation); GO:0006470(biological_process:protein dephosphorylation); GO:0048754(biological_process:branching morphogenesis of an epithelial tube); GO:0043025(cellular_component:neuronal…	K06269	PPP1C	map04024(cAMP signaling pathway); map05205(Proteoglycans in cancer); map04114(Oocyte meiosis); map04750(Inflammatory mediator regulation of TRP channels); map04390(Hippo signaling pathway); map04261(Adrenergic signaling in cardiomyocytes); map04270(Vascular smooth muscle contraction); map05168(Herpes simplex infection); map04921(Oxytocin signaling pathway); map04810(Regulation of actin cytoskelet…	ENOG410XPVF(J:Translation, ribosomal structure and biogenesis)	TKC36665.1(hypothetical protein EI555_010783, partial [Monodon monoceros])	sp|Q3T0E7|PP1A_BOVIN(Serine/threonine-protein phosphatase PP1-alpha catalytic subunit OS=Bos taurus OX=9913 GN=PPP1CA PE=2 SV=1)	PF00149.28(Metallophos:Calcineurin-like phosphoesterase); PF16891.5(STPPase_N:Serine-threonine protein phosphatase N-terminal domain)
Pig.15653.1	Pig.15653	NPY-201	pro-neuropeptide Y precursor [Sus scrofa]	0	0	0	0	0	0	0	0	0.28	GO:0005179(molecular_function:hormone activity); GO:0005794(cellular_component:Golgi apparatus); GO:0007218(biological_process:neuropeptide signaling pathway); GO:0005184(molecular_function:neuropeptide hormone activity); GO:0005615(cellular_component:extracellular space); GO:0032100(biological_process:positive regulation of appetite); GO:0031841(molecular_function:neuropeptide Y receptor binding…	K05232	NPY	map04024(cAMP signaling pathway); map04920(Adipocytokine signaling pathway); map04923(Regulation of lipolysis in adipocytes); map05034(Alcoholism)	ENOG41128I2(U:Intracellular trafficking, secretion, and vesicular transport)	NP_001243296.1(pro-neuropeptide Y precursor [Sus scrofa])	sp|Q9XSW6|NPY_MACMU(Pro-neuropeptide Y OS=Macaca mulatta OX=9544 GN=NPY PE=1 SV=1)	PF00159.18(Hormone_3:Pancreatic hormone peptide)
Pig.07297.1	Pig.07297	CD109-203	CD109 antigen isoform X1 [Sus scrofa]	0.4	0.32	0.59	0.28	0.26	0.2	3.74	6.31	5.56	GO:0016021(cellular_component:integral component of membrane); GO:0061045(biological_process:negative regulation of wound healing); GO:0005615(cellular_component:extracellular space); GO:0001942(biological_process:hair follicle development); GO:0045616(biological_process:regulation of keratinocyte differentiation); GO:0072675(biological_process:osteoclast fusion); GO:0004866(molecular_function:en…	K06530	CD109		COG2373(J:Translation, ribosomal structure and biogenesis); ENOG410XRED(J:Translation, ribosomal structure and biogenesis)	XP_001927580.3(CD109 antigen isoform X1 [Sus scrofa])	sp|Q6YHK3|CD109_HUMAN(CD109 antigen OS=Homo sapiens OX=9606 GN=CD109 PE=1 SV=2)	PF07678.14(TED_complement:A-macroglobulin TED domain); PF00207.22(A2M:Alpha-2-macroglobulin family); PF07703.14(A2M_BRD:Alpha-2-macroglobulin bait region domain); PF07677.14(A2M_recep:A-macroglobulin receptor binding domain); PF17791.1(MG3:Macroglobulin domain MG3); PF01835.19(MG2:MG2 domain)
Pig.12773.1	Pig.12773	OSBPL10-203	oxysterol-binding protein-related protein 10 [Sus scrofa]	0.7	0.29	0.44	0.64	0.67	0.71	1.49	1.7	0.71	GO:0005794(cellular_component:Golgi apparatus); GO:0032934(molecular_function:sterol binding); GO:0015485(molecular_function:cholesterol binding); GO:0006869(biological_process:lipid transport); GO:0005829(cellular_component:cytosol); GO:0016020(cellular_component:membrane); GO:0008289(molecular_function:lipid binding); GO:0015248(molecular_function:sterol transporter activity); GO:0001786(molecu…				ENOG410XRW6(S:Function unknown)	XP_003483186.2(oxysterol-binding protein-related protein 10 [Sus scrofa])	sp|Q9BXB5|OSB10_HUMAN(Oxysterol-binding protein-related protein 10 OS=Homo sapiens OX=9606 GN=OSBPL10 PE=1 SV=2)	PF01237.18(Oxysterol_BP:Oxysterol-binding protein); PF15409.6(PH_8:Pleckstrin homology domain); PF00169.29(PH:PH domain)
Pig.20078.1	Pig.20078	SCFD1-201	sec1 family domain-containing protein 1 isoform X3 [Sus scrofa]	11.21	6.92	13.41	3.63	2.06	3.27	4.68	5.3	5.91	GO:0006904(biological_process:vesicle docking involved in exocytosis)	K19998	SCFD1, SLY1		COG5158(U:Intracellular trafficking, secretion, and vesicular transport)	XP_020955561.1(sec1 family domain-containing protein 1 isoform X3 [Sus scrofa])	sp|Q8WVM8|SCFD1_HUMAN(Sec1 family domain-containing protein 1 OS=Homo sapiens OX=9606 GN=SCFD1 PE=1 SV=4)	PF00995.23(Sec1:Sec1 family)
Pig.02157.1	Pig.02157	IQCB1-201	LOW QUALITY PROTEIN: IQ calmodulin-binding motif-containing protein 1 [Sus scrofa]	0.74	0.77	0.81	1.16	0.96	1.02	2.2	2.29	2.54	GO:0032391(cellular_component:photoreceptor connecting cilium); GO:0072686(cellular_component:mitotic spindle); GO:0045171(cellular_component:intercellular bridge); GO:0060271(biological_process:cilium assembly); GO:0005813(cellular_component:centrosome); GO:0019899(molecular_function:enzyme binding); GO:0005654(cellular_component:nucleoplasm); GO:0048496(biological_process:maintenance of animal …	K16774	IQCB1, NPHP5		COG5022(U:Intracellular trafficking, secretion, and vesicular transport)	XP_020925931.1(LOW QUALITY PROTEIN: IQ calmodulin-binding motif-containing protein 1 [Sus scrofa])	sp|Q8BP00|IQCB1_MOUSE(IQ calmodulin-binding motif-containing protein 1 OS=Mus musculus OX=10090 GN=Iqcb1 PE=1 SV=2)	PF00612.27(IQ:IQ calmodulin-binding motif)
Pig.21416.1	Pig.21416	FAM155B-201	transmembrane protein FAM155B isoform X1 [Sus scrofa]	1.88	3.15	2.38	0.22	1.91	1.61	1.21	0.8	0.75	GO:0098703(biological_process:calcium ion import across plasma membrane); GO:0005886(cellular_component:plasma membrane)				ENOG410ZYWZ(K:Transcription)	XP_020935701.1(transmembrane protein FAM155B isoform X1 [Sus scrofa])	sp|O75949|F155B_HUMAN(Transmembrane protein FAM155B OS=Homo sapiens OX=9606 GN=FAM155B PE=2 SV=3)
Pig.13653.1	Pig.13653	GBX1-201	PREDICTED: homeobox protein GBX-1, partial [Pteropus alecto]	0	0.03	0	0	0	0	0	0.04	0	GO:0043565(molecular_function:sequence-specific DNA binding); GO:0021522(biological_process:spinal cord motor neuron differentiation); GO:0048663(biological_process:neuron fate commitment); GO:0005634(cellular_component:nucleus); GO:0097374(biological_process:sensory neuron axon guidance); GO:0007628(biological_process:adult walking behavior); GO:0006355(biological_process:regulation of transcrip…	K09321	GBX		ENOG410ZTBY(S:Function unknown)	XP_003360124.1(homeobox protein GBX-1 [Sus scrofa])	sp|Q14549|GBX1_HUMAN(Homeobox protein GBX-1 OS=Homo sapiens OX=9606 GN=GBX1 PE=1 SV=2)	PF00046.29(Homeodomain:Homeodomain)
Pig.12169.1	Pig.12169	ADAMTS15-201	A disintegrin and metalloproteinase with thrombospondin motifs 15 [Sus scrofa]	0.46	1.01	0.48	0.39	0.32	0.53	32.58	35.95	12.11	GO:0004222(molecular_function:metalloendopeptidase activity); GO:0005615(cellular_component:extracellular space); GO:0050840(molecular_function:extracellular matrix binding); GO:0007229(biological_process:integrin-mediated signaling pathway); GO:0008201(molecular_function:heparin binding); GO:0062023(cellular_component:collagen-containing extracellular matrix); GO:0008270(molecular_function:zinc …	K08629	ADAMTS15		ENOG410XPKZ(S:Function unknown)	XP_003130129.1(A disintegrin and metalloproteinase with thrombospondin motifs 15 [Sus scrofa])	sp|Q8TE58|ATS15_HUMAN(A disintegrin and metalloproteinase with thrombospondin motifs 15 OS=Homo sapiens OX=9606 GN=ADAMTS15 PE=2 SV=1)	PF05986.14(ADAM_spacer1:ADAM-TS Spacer 1); PF01562.19(Pep_M12B_propep:Reprolysin family propeptide); PF17771.1(ADAM_CR_2:ADAM cysteine-rich domain); PF01421.19(Reprolysin:Reprolysin (M12B) family zinc metalloprotease); PF00090.19(TSP_1:Thrombospondin type 1 domain); PF13688.6(Reprolysin_5:Metallo-peptidase family M12); PF13582.6(Reprolysin_3:Metallo-peptidase family M12B Reprolysin-like)
MSTRG.39950.2	MSTRG.39950			25.16	20.89	28.47	8.56	7.92	7.67	77.68	111.89	63.08	GO:0048589(biological_process:developmental growth); GO:0043950(biological_process:positive regulation of cAMP-mediated signaling); GO:0030425(cellular_component:dendrite); GO:0031698(molecular_function:beta-2 adrenergic receptor binding); GO:0001501(biological_process:skeletal system development); GO:0055074(biological_process:calcium ion homeostasis); GO:0035264(biological_process:multicellular…	K04632	GNAS	map05142(Chagas disease (American trypanosomiasis)); map05165(Human papillomavirus infection); map05163(Human cytomegalovirus infection); map04750(Inflammatory mediator regulation of TRP channels); map04015(Rap1 signaling pathway); map04540(Gap junction); map04270(Vascular smooth muscle contraction); map04072(Phospholipase D signaling pathway); map05146(Amoebiasis); map04961(Endocrine and other f…	ENOG410XPC4(S:Function unknown)	NP_001070957.1(protein GNAS isoform g [Homo sapiens] >NP_001165456.1 guanine nucleotide-binding protein G(s) subunit alpha isoform g [Sus scrofa] >XP_003277551.2 PREDICTED: guanine nucleotide-binding protein G(s) subunit alpha isoform X6 [Nomascus leucogenys] >XP_007185301.1 guanine nucleotide-binding protein G(s) subunit alpha isoform X7 [Balaenoptera acutorostrata scammoni] >XP_020029228.1 guan…	sp|P63092|GNAS2_HUMAN(Guanine nucleotide-binding protein G(s) subunit alpha isoforms short OS=Homo sapiens OX=9606 GN=GNAS PE=1 SV=1)	PF00503.20(G-alpha:G-protein alpha subunit); PF00025.21(Arf:ADP-ribosylation factor family); PF04670.12(Gtr1_RagA:Gtr1/RagA G protein conserved region)
MSTRG.39950.3	MSTRG.39950			150.65	151.85	162.61	65.98	53.95	49.23	382.09	592.23	369.71	GO:0048589(biological_process:developmental growth); GO:0043950(biological_process:positive regulation of cAMP-mediated signaling); GO:0030425(cellular_component:dendrite); GO:0031698(molecular_function:beta-2 adrenergic receptor binding); GO:0001501(biological_process:skeletal system development); GO:0055074(biological_process:calcium ion homeostasis); GO:0035264(biological_process:multicellular…	K04632	GNAS	map05142(Chagas disease (American trypanosomiasis)); map05165(Human papillomavirus infection); map05163(Human cytomegalovirus infection); map04750(Inflammatory mediator regulation of TRP channels); map04015(Rap1 signaling pathway); map04540(Gap junction); map04270(Vascular smooth muscle contraction); map04072(Phospholipase D signaling pathway); map05146(Amoebiasis); map04961(Endocrine and other f…	ENOG410XPC4(S:Function unknown)	NP_536351.1(protein GNAS isoform GNASS [Homo sapiens] >NP_001165454.1 guanine nucleotide-binding protein G(s) subunit alpha isoform GNASS [Sus scrofa] >XP_007185300.1 guanine nucleotide-binding protein G(s) subunit alpha isoform X5 [Balaenoptera acutorostrata scammoni] >XP_012367243.1 PREDICTED: guanine nucleotide-binding protein G(s) subunit alpha isoform X5 [Nomascus leucogenys] >XP_020029227.1…	sp|P63092|GNAS2_HUMAN(Guanine nucleotide-binding protein G(s) subunit alpha isoforms short OS=Homo sapiens OX=9606 GN=GNAS PE=1 SV=1)	PF00503.20(G-alpha:G-protein alpha subunit); PF00025.21(Arf:ADP-ribosylation factor family); PF04670.12(Gtr1_RagA:Gtr1/RagA G protein conserved region)
Pig.08844.1	Pig.08844	ALPK3	alpha-protein kinase 3 [Sus scrofa]	0	0.1	0.07	0.09	0.04	0.08	0.18	0.32	0.18	GO:0004674(molecular_function:protein serine/threonine kinase activity); GO:0005524(molecular_function:ATP binding)	K08868	ALPK		ENOG410Y8B3(S:Function unknown)	XP_020954559.1(alpha-protein kinase 3 [Sus scrofa])	sp|Q96L96|ALPK3_HUMAN(Alpha-protein kinase 3 OS=Homo sapiens OX=9606 GN=ALPK3 PE=1 SV=2)	PF02816.18(Alpha_kinase:Alpha-kinase family); PF07679.16(I-set:Immunoglobulin I-set domain); PF13927.6(Ig_3:Immunoglobulin domain); PF13895.6(Ig_2:Immunoglobulin domain)
Pig.17258.1	Pig.17258	RDH16-207	retinol dehydrogenase 16 isoform X1 [Sus scrofa]	139.25	169.22	105.56	134.21	121.29	121.2	61.29	66.55	80.89	GO:0016491(molecular_function:oxidoreductase activity)	K11154	RDH16	map00830(Retinol metabolism)	ENOG410Y7FK(U:Intracellular trafficking, secretion, and vesicular transport)	XP_020947468.1(retinol dehydrogenase 16 isoform X1 [Sus scrofa])	sp|O75452|RDH16_HUMAN(Retinol dehydrogenase 16 OS=Homo sapiens OX=9606 GN=RDH16 PE=1 SV=2)	PF00106.25(adh_short:short chain dehydrogenase); PF13561.6(adh_short_C2:Enoyl-(Acyl carrier protein) reductase)
Pig.20143.1	Pig.20143	FSTL4-201	follistatin-related protein 4 isoform X2 [Sus scrofa]	0.03	0.02	0	0	0.02	0.02	0.04	0	0	GO:0005509(molecular_function:calcium ion binding)				ENOG410YBHC(U:Intracellular trafficking, secretion, and vesicular transport)	XP_020940412.1(follistatin-related protein 4 isoform X2 [Sus scrofa])	sp|Q6MZW2|FSTL4_HUMAN(Follistatin-related protein 4 OS=Homo sapiens OX=9606 GN=FSTL4 PE=2 SV=3)	PF13927.6(Ig_3:Immunoglobulin domain); PF07679.16(I-set:Immunoglobulin I-set domain); PF13895.6(Ig_2:Immunoglobulin domain); PF00047.25(ig:Immunoglobulin domain)
Pig.07781.1	Pig.07781	SYK-201	tyrosine-protein kinase SYK [Sus scrofa]	1.88	1.85	2.52	1.75	1.01	1.18	2.1	2.65	3.31	GO:0071226(biological_process:cellular response to molecule of fungal origin); GO:0005829(cellular_component:cytosol); GO:0032928(biological_process:regulation of superoxide anion generation); GO:0042742(biological_process:defense response to bacterium); GO:0035556(biological_process:intracellular signal transduction); GO:0001525(biological_process:angiogenesis); GO:0002366(biological_process:leu…	K05855	SYK	map04666(Fc gamma R-mediated phagocytosis); map05152(Tuberculosis); map04664(Fc epsilon RI signaling pathway); map04650(Natural killer cell mediated cytotoxicity); map04662(B cell receptor signaling pathway); map05167(Kaposi sarcoma-associated herpesvirus infection); map04064(NF-kappa B signaling pathway); map04072(Phospholipase D signaling pathway); map05169(Epstein-Barr virus infection); map046…	COG0515(O:Posttranslational modification, protein turnover, chaperones)	NP_001098422.1(tyrosine-protein kinase SYK [Sus scrofa])	sp|Q00655|KSYK_PIG(Tyrosine-protein kinase SYK OS=Sus scrofa OX=9823 GN=SYK PE=1 SV=1)	PF07714.17(Pkinase_Tyr:Protein tyrosine kinase); PF00017.24(SH2:SH2 domain); PF00069.25(Pkinase:Protein kinase domain)
Pig.18119.1	Pig.18119	Otog	NR:NA	2.48	1.55	4.04	5.88	5.03	7.92	5.47	7.36	4.12						XP_020954391.1(cullin-7 isoform X1 [Sus scrofa])
Pig.01713.1	Pig.01713	CCDC18-201	coiled-coil domain-containing protein 18 isoform X1 [Sus scrofa]	1.21	0.67	1.08	0.39	0.19	0.26	0.24	0.46	0.37					ENOG4111YKF(S:Function unknown)	XP_020945847.1(coiled-coil domain-containing protein 18 isoform X1 [Sus scrofa])	sp|Q5T9S5|CCD18_HUMAN(Coiled-coil domain-containing protein 18 OS=Homo sapiens OX=9606 GN=CCDC18 PE=1 SV=1)
MSTRG.2322.1	MSTRG.2322			0.17	0.08	0.36	0.76	0.54	0.38	0.23	0.65	0.21	GO:0003964(molecular_function:RNA-directed DNA polymerase activity); GO:0004519(molecular_function:endonuclease activity)				ENOG410Y3WU(S:Function unknown)	ELR47876.1(hypothetical protein M91_20604 [Bos mutus])	sp|P11369|LORF2_MOUSE(LINE-1 retrotransposable element ORF2 protein OS=Mus musculus OX=10090 GN=Pol PE=1 SV=2)
Pig.12426.1	Pig.12426	NDC1-202	nucleoporin NDC1 [Sus scrofa]	2.44	2.4	3.1	1.85	1.92	1.77	1.94	2.37	2.08	GO:0016021(cellular_component:integral component of membrane)	K14315	NDC1, TMEM48	map03013(RNA transport)	ENOG4110XEC(U:Intracellular trafficking, secretion, and vesicular transport)	XP_003356508.3(nucleoporin NDC1 [Sus scrofa])	sp|Q9BTX1|NDC1_HUMAN(Nucleoporin NDC1 OS=Homo sapiens OX=9606 GN=NDC1 PE=1 SV=2)	PF09531.10(Ndc1_Nup:Nucleoporin protein Ndc1-Nup)
Pig.08280.1	Pig.08280	STPG4-203	uncharacterized protein C2orf61 homolog [Sus scrofa]	0	0.12	0.19	0.13	0.08	0.13	0.31	0.24	0.07	GO:1901537(biological_process:positive regulation of DNA demethylation)				ENOG4111R2U(S:Function unknown)	XP_003481269.2(uncharacterized protein C2orf61 homolog [Sus scrofa])	sp|Q8N801|STPG4_HUMAN(Protein STPG4 OS=Homo sapiens OX=9606 GN=STPG4 PE=2 SV=2)	PF07004.12(SHIPPO-rpt:Sperm-tail PG-rich repeat)
Pig.07207.1	Pig.07207	SBNO1-201	protein strawberry notch homolog 1 isoform X1 [Sus scrofa]	9.65	7.41	11.14	3.93	2.27	3.65	3.16	3.72	4.67	GO:0006355(biological_process:regulation of transcription, DNA-templated)				ENOG410XQ7Q(S:Function unknown)	XP_020929651.1(protein strawberry notch homolog 1 isoform X1 [Sus scrofa])	sp|A3KN83|SBNO1_HUMAN(Protein strawberry notch homolog 1 OS=Homo sapiens OX=9606 GN=SBNO1 PE=1 SV=1)	PF13872.6(AAA_34:P-loop containing NTP hydrolase pore-1); PF13871.6(Helicase_C_4:C-terminal domain on Strawberry notch homologue); PF04851.15(ResIII:Type III restriction enzyme, res subunit)
Pig.22758.1	Pig.22758	Ces1d	liver carboxylesterase isoform X6 [Sus scrofa]	281.3	347.67	220.8	127.37	165.1	153.75	53.22	22.71	66.43	GO:0016787(molecular_function:hydrolase activity); GO:0004806(molecular_function:triglyceride lipase activity); GO:0005615(cellular_component:extracellular space); GO:0080030(molecular_function:methyl indole-3-acetate esterase activity); GO:0052689(molecular_function:carboxylic ester hydrolase activity); GO:0016042(biological_process:lipid catabolic process); GO:0005788(cellular_component:endopla…	K01044	CES1	map00983(Drug metabolism - other enzymes)	COG2272(I:Lipid transport and metabolism)	XP_020949222.1(liver carboxylesterase isoform X6 [Sus scrofa])	sp|Q29550|EST1_PIG(Liver carboxylesterase OS=Sus scrofa OX=9823 PE=1 SV=1)	PF00135.28(COesterase:Carboxylesterase family); PF07859.13(Abhydrolase_3:alpha/beta hydrolase fold)
Pig.12567.1	Pig.12567	LMO2-201	PREDICTED: rhombotin-2 isoform X1 [Rhinolophus sinicus]	1.23	1.87	3.07	1.51	1.35	1.28	3.23	3.39	4.09	GO:0005667(cellular_component:transcription factor complex); GO:0097067(biological_process:cellular response to thyroid hormone stimulus); GO:0001228(molecular_function:transcriptional activator activity, RNA polymerase II transcription regulatory region sequence-specific binding); GO:0048037(molecular_function:cofactor binding); GO:0001102(molecular_function:RNA polymerase II activating transcri…	K15612	LMO2	map05202(Transcriptional misregulation in cancer)	ENOG410YIJ3(P:Inorganic ion transport and metabolism)	NP_001253136.1(rhombotin-2 [Macaca mulatta])	sp|P25791|RBTN2_HUMAN(Rhombotin-2 OS=Homo sapiens OX=9606 GN=LMO2 PE=1 SV=1)	PF00412.22(LIM:LIM domain)
Pig.08507.1	Pig.08507	GPC5-201	glypican-5 isoform X2 [Sus scrofa]	0	0	0	0	0.02	0	0.02	1.18	0	GO:0009966(biological_process:regulation of signal transduction); GO:0046658(cellular_component:anchored component of plasma membrane); GO:0062023(cellular_component:collagen-containing extracellular matrix)	K08111	GPC5		ENOG410XST2(O:Posttranslational modification, protein turnover, chaperones)	XP_020921028.1(glypican-5 isoform X2 [Sus scrofa])	sp|P78333|GPC5_HUMAN(Glypican-5 OS=Homo sapiens OX=9606 GN=GPC5 PE=2 SV=1)	PF01153.19(Glypican:Glypican)
Pig.08473.1	Pig.08473	KIAA0825	uncharacterized protein KIAA0825 homolog isoform X1 [Sus scrofa]	0.58	0.33	0.88	0.35	0.36	0.47	0.56	0.88	0.89						XP_020941036.1(uncharacterized protein KIAA0825 homolog isoform X1 [Sus scrofa])	sp|Q8IV33|K0825_HUMAN(Uncharacterized protein KIAA0825 OS=Homo sapiens OX=9606 GN=KIAA0825 PE=2 SV=3)	PF14906.6(DUF4495:Domain of unknown function (DUF4495))
Pig.15723.1	Pig.15723	PDPR-201	PREDICTED: pyruvate dehydrogenase phosphatase regulatory subunit, mitochondrial-like [Rousettus aegyptiacus]	2.28	2.33	2.39	1.14	1.13	1.61	4.66	7.08	5.7		K17509	PDPR		COG0404(U:Intracellular trafficking, secretion, and vesicular transport)	XP_020949447.1(pyruvate dehydrogenase phosphatase regulatory subunit, mitochondrial isoform X1 [Sus scrofa])	sp|O46504|PDPR_BOVIN(Pyruvate dehydrogenase phosphatase regulatory subunit, mitochondrial OS=Bos taurus OX=9913 GN=PDPR PE=1 SV=1)	PF01571.21(GCV_T:Aminomethyltransferase folate-binding domain); PF08669.11(GCV_T_C:Glycine cleavage T-protein C-terminal barrel domain)
MSTRG.8838.1	MSTRG.8838			6.91	5.67	7.71	4.55	3.63	4.28	7.9	10.71	9.01	GO:0004478(molecular_function:methionine adenosyltransferase activity); GO:1990830(biological_process:cellular response to leukemia inhibitory factor); GO:0032259(biological_process:methylation); GO:0006556(biological_process:S-adenosylmethionine biosynthetic process); GO:0042493(biological_process:response to drug); GO:0006730(biological_process:one-carbon metabolic process); GO:0051291(biologic…	K00789	metK	map00270(Cysteine and methionine metabolism)	COG0192(H:Coenzyme transport and metabolism)	TKC46229.1(hypothetical protein EI555_012878, partial [Monodon monoceros])	sp|P31153|METK2_HUMAN(S-adenosylmethionine synthase isoform type-2 OS=Homo sapiens OX=9606 GN=MAT2A PE=1 SV=1)	PF02773.16(S-AdoMet_synt_C:S-adenosylmethionine synthetase, C-terminal domain); PF02772.16(S-AdoMet_synt_M:S-adenosylmethionine synthetase, central domain); PF00438.20(S-AdoMet_synt_N:S-adenosylmethionine synthetase, N-terminal domain); PF05090.14(VKG_Carbox:Vitamin K-dependent gamma-carboxylase)
Pig.13643.1	Pig.13643	KCNH2-201	potassium voltage-gated channel subfamily H member 2 isoform X8 [Sus scrofa]	0	0	0.11	0.02	0.03	0	0.47	0.2	0.17		K04905	KCNH2, KV11.1		ENOG410XPSE(P:Inorganic ion transport and metabolism); ENOG41112SX(U:Intracellular trafficking, secretion, and vesicular transport)	XP_020934420.1(potassium voltage-gated channel subfamily H member 2 isoform X5 [Sus scrofa])	sp|Q12809|KCNH2_HUMAN(Potassium voltage-gated channel subfamily H member 2 OS=Homo sapiens OX=9606 GN=KCNH2 PE=1 SV=1)	PF00027.29(cNMP_binding:Cyclic nucleotide-binding domain)
Pig.15024.1	Pig.15024	CYYR1-201	cysteine and tyrosine-rich protein 1 [Sus scrofa]	6.99	7.44	7.41	1.56	2.19	2.93	14.12	19.32	16.36	GO:0016021(cellular_component:integral component of membrane)				ENOG4111TRP(U:Intracellular trafficking, secretion, and vesicular transport)	XP_020927109.1(cysteine and tyrosine-rich protein 1 [Sus scrofa])	sp|Q96J86|CYYR1_HUMAN(Cysteine and tyrosine-rich protein 1 OS=Homo sapiens OX=9606 GN=CYYR1 PE=2 SV=1)	PF10873.8(CYYR1:Cysteine and tyrosine-rich protein 1)
Pig.04928.1	Pig.04928	SELP-203	P-selectin precursor [Sus scrofa]	0.68	0.67	1.1	0.46	0.13	0.53	0.65	0.19	0.72	GO:0007155(biological_process:cell adhesion); GO:0016021(cellular_component:integral component of membrane); GO:0030246(molecular_function:carbohydrate binding)	K06496	SELP, CD62P	map04514(Cell adhesion molecules (CAMs)); map05150(Staphylococcus aureus infection); map05144(Malaria)	ENOG410Y5JF(U:Intracellular trafficking, secretion, and vesicular transport)	NP_999243.1(P-selectin precursor [Sus scrofa])	sp|P98109|LYAM3_SHEEP(P-selectin OS=Ovis aries OX=9940 GN=SELP PE=2 SV=1)	PF00084.20(Sushi:Sushi repeat (SCR repeat)); PF00059.21(Lectin_C:Lectin C-type domain); PF07974.13(EGF_2:EGF-like domain)
Pig.19862.1	Pig.19862	SNCG-201	gamma-synuclein [Sus scrofa]	8.91	14.67	8	6.23	11.66	11.48	257.14	567.81	716.04	GO:0005737(cellular_component:cytoplasm); GO:0050808(biological_process:synapse organization); GO:0009306(biological_process:protein secretion); GO:0030424(cellular_component:axon); GO:0046928(biological_process:regulation of neurotransmitter secretion); GO:0007268(biological_process:chemical synaptic transmission); GO:0014059(biological_process:regulation of dopamine secretion); GO:0043025(cellu…				ENOG4111VY5(O:Posttranslational modification, protein turnover, chaperones)	NP_001096681.1(gamma-synuclein [Sus scrofa])	sp|Q9NZ50|SYUG_BOVIN(Gamma-synuclein OS=Bos taurus OX=9913 GN=SNCG PE=1 SV=1)	PF01387.17(Synuclein:Synuclein)
MSTRG.30709.1	MSTRG.30709			3.52	2.71	5.01	16.39	11.24	13.86	7.74	11.11	11.21	GO:0005737(cellular_component:cytoplasm); GO:0010494(cellular_component:cytoplasmic stress granule); GO:0005730(cellular_component:nucleolus); GO:0032197(biological_process:transposition, RNA-mediated); GO:1990904(cellular_component:ribonucleoprotein complex); GO:0000166(molecular_function:nucleotide binding); GO:0003727(molecular_function:single-stranded RNA binding); GO:0055114(biological_proce…					XP_028365193.1(LINE-1 type transposase domain-containing protein 1 [Phyllostomus discolor])	sp|Q9UN81|LORF1_HUMAN(LINE-1 retrotransposable element ORF1 protein OS=Homo sapiens OX=9606 GN=L1RE1 PE=1 SV=1)	PF17490.2(Tnp_22_dsRBD:L1 transposable element dsRBD-like domain)
Pig.09894.1	Pig.09894	SBF2-203	myotubularin-related protein 13 isoform X1 [Sus scrofa]	3.59	2.46	5.76	3.12	2.67	3.75	9.87	11.3	12.61		K18061	SBF1_2, MTMR5_13		ENOG410XTJ1(S:Function unknown)	XP_005661188.2(myotubularin-related protein 13 isoform X1 [Sus scrofa])	sp|Q86WG5|MTMRD_HUMAN(Myotubularin-related protein 13 OS=Homo sapiens OX=9606 GN=SBF2 PE=1 SV=1)	PF12335.8(SBF2:Myotubularin protein); PF06602.14(Myotub-related:Myotubularin-like phosphatase domain); PF02141.21(DENN:DENN (AEX-3) domain); PF03456.18(uDENN:uDENN domain); PF02893.20(GRAM:GRAM domain); PF00169.29(PH:PH domain); PF03455.19(dDENN:dDENN domain); PF15409.6(PH_8:Pleckstrin homology domain); PF08616.10(SPA:Stabilization of polarity axis)
Pig.08517.1	Pig.08517	TAS1R1-201	taste receptor type 1 member 1 isoform X1 [Sus scrofa]	0	0.02	0.12	0.05	0.03	0.1	0.28	0.33	0.32	GO:0050917(biological_process:sensory perception of umami taste); GO:0004930(molecular_function:G-protein coupled receptor activity); GO:0016021(cellular_component:integral component of membrane); GO:0008527(molecular_function:taste receptor activity); GO:0005886(cellular_component:plasma membrane)	K04624	TAS1R1	map04742(Taste transduction)	ENOG410XR6W(S:Function unknown)	XP_013844202.2(taste receptor type 1 member 1 isoform X1 [Sus scrofa])	sp|Q7RTX1|TS1R1_HUMAN(Taste receptor type 1 member 1 OS=Homo sapiens OX=9606 GN=TAS1R1 PE=2 SV=1)	PF01094.28(ANF_receptor:Receptor family ligand binding region); PF00003.22(7tm_3:7 transmembrane sweet-taste receptor of 3 GCPR); PF07562.14(NCD3G:Nine Cysteines Domain of family 3 GPCR); PF13458.6(Peripla_BP_6:Periplasmic binding protein)
Pig.11146.1	Pig.11146	KCTD3-201	SH3KBP1-binding protein 1-like, partial [Acanthochromis polyacanthus]	0	0	0	0	0.12	0.14	0	0.25	0.23	GO:0051260(biological_process:protein homooligomerization); GO:0005886(cellular_component:plasma membrane)				ENOG410XSWI(S:Function unknown)	KPP72265.1(BTB/POZ domain-containing protein KCTD3-like [Scleropages formosus])	sp|Q8BFX3|KCTD3_MOUSE(BTB/POZ domain-containing protein KCTD3 OS=Mus musculus OX=10090 GN=Kctd3 PE=1 SV=1)
Pig.13245.1	Pig.13245	BORCS5-201	PREDICTED: loss of heterozygosity 12 chromosomal region 1 protein isoform X1 [Vicugna pacos]	4.45	4.19	6.07	3.69	3.07	2.67	11.68	15.79	14.06	GO:0032418(biological_process:lysosome localization); GO:0098574(cellular_component:cytoplasmic side of lysosomal membrane); GO:0072384(biological_process:organelle transport along microtubule); GO:0099078(cellular_component:BORC complex); GO:0005873(cellular_component:plus-end kinesin complex); GO:0031224(cellular_component:intrinsic component of membrane)	K20819	BORCS5, LOH12CR1		ENOG410YDKQ(S:Function unknown)	XP_006199932.1(PREDICTED: loss of heterozygosity 12 chromosomal region 1 protein isoform X1 [Vicugna pacos])	sp|Q08DP2|BORC5_BOVIN(BLOC-1-related complex subunit 5 OS=Bos taurus OX=9913 GN=BORCS5 PE=2 SV=1)	PF10158.9(LOH1CR12:Tumour suppressor protein)
Pig.04952.1	Pig.04952	POU2F1-201	POU domain, class 2, transcription factor 1 isoform X1 [Sus scrofa]	4.07	4.45	3.36	1.57	1.77	1.77	5.25	6.85	6.95	GO:0003700(molecular_function:transcription factor activity, sequence-specific DNA binding); GO:0043565(molecular_function:sequence-specific DNA binding); GO:0005634(cellular_component:nucleus); GO:0045892(biological_process:negative regulation of transcription, DNA-templated)	K09364	POU2F, OTF		ENOG410XQ7X(U:Intracellular trafficking, secretion, and vesicular transport)	XP_013852252.1(POU domain, class 2, transcription factor 1 isoform X1 [Sus scrofa])	sp|Q29076|PO2F1_PIG(POU domain, class 2, transcription factor 1 OS=Sus scrofa OX=9823 GN=POU2F1 PE=2 SV=1)	PF00157.17(Pou:Pou domain - N-terminal to homeobox domain); PF00046.29(Homeodomain:Homeodomain)
MSTRG.34157.9	MSTRG.34157			0.22	0.13	0.24	0.33	0.37	0.52	0.3	0.32	0.28	GO:0003964(molecular_function:RNA-directed DNA polymerase activity); GO:0004519(molecular_function:endonuclease activity); GO:0016021(cellular_component:integral component of membrane)				ENOG410Y3WU(S:Function unknown); ENOG41100D0(S:Function unknown); ENOG410Y9TZ(S:Function unknown)	AAS66215.1(LRRG00124 [Rattus norvegicus])	sp|P11369|LORF2_MOUSE(LINE-1 retrotransposable element ORF2 protein OS=Mus musculus OX=10090 GN=Pol PE=1 SV=2)
MSTRG.34157.4	MSTRG.34157			0	0.04	0.04	0.03	0.01	0.02	0.08	0.05	0.14	GO:0003964(molecular_function:RNA-directed DNA polymerase activity); GO:0004519(molecular_function:endonuclease activity); GO:0016021(cellular_component:integral component of membrane)				ENOG410Y3WU(S:Function unknown); ENOG41100D0(S:Function unknown); ENOG410Y9TZ(S:Function unknown)	AAS66215.1(LRRG00124 [Rattus norvegicus])	sp|P11369|LORF2_MOUSE(LINE-1 retrotransposable element ORF2 protein OS=Mus musculus OX=10090 GN=Pol PE=1 SV=2)
Pig.12757.1	Pig.12757	REXO2-205	PREDICTED: oligoribonuclease, mitochondrial [Odobenus rosmarus divergens]	41.55	37.89	42.74	16.95	15.41	18.4	57.53	71.68	64.85	GO:0005730(cellular_component:nucleolus); GO:0005739(cellular_component:mitochondrion); GO:0000175(molecular_function:3'-5'-exoribonuclease activity); GO:0003676(molecular_function:nucleic acid binding); GO:0005759(cellular_component:mitochondrial matrix); GO:0005758(cellular_component:mitochondrial intermembrane space); GO:0005925(cellular_component:focal adhesion)	K13288	orn, REX2, REXO2	map03008(Ribosome biogenesis in eukaryotes)	COG1949(A:RNA processing and modification)	XP_003129926.1(oligoribonuclease, mitochondrial [Sus scrofa])	sp|A2VE52|ORN_BOVIN(Oligoribonuclease, mitochondrial OS=Bos taurus OX=9913 GN=REXO2 PE=2 SV=1)	PF00929.24(RNase_T:Exonuclease)
Pig.15697.1	Pig.15697	UTP18-201	U3 small nucleolar RNA-associated protein 18 homolog [Sus scrofa]	2.75	3.12	3.19	2.27	1.23	1.45	3.82	4.71	4.73	GO:0034388(cellular_component:Pwp2p-containing subcomplex of 90S preribosome); GO:0032040(cellular_component:small-subunit processome); GO:0031965(cellular_component:nuclear membrane); GO:0005730(cellular_component:nucleolus)	K14553	UTP18	map03008(Ribosome biogenesis in eukaryotes)	ENOG410YBWP(S:Function unknown)	XP_003131644.2(U3 small nucleolar RNA-associated protein 18 homolog [Sus scrofa])	sp|Q9Y5J1|UTP18_HUMAN(U3 small nucleolar RNA-associated protein 18 homolog OS=Homo sapiens OX=9606 GN=UTP18 PE=1 SV=3)
Pig.14888.1	Pig.14888	MEGF6-201	multiple epidermal growth factor-like domains protein 6 isoform X2 [Sus scrofa]	0.06	0.01	0.1	0.04	0.04	0.01	0.33	0.55	0.44					ENOG410XQWV(S:Function unknown)	XP_020950873.1(multiple epidermal growth factor-like domains protein 6 isoform X3 [Sus scrofa])	sp|O75095|MEGF6_HUMAN(Multiple epidermal growth factor-like domains protein 6 OS=Homo sapiens OX=9606 GN=MEGF6 PE=1 SV=4)	PF14670.6(FXa_inhibition:Coagulation Factor Xa inhibitory site); PF00053.24(Laminin_EGF:Laminin EGF domain); PF07645.15(EGF_CA:Calcium-binding EGF domain); PF12662.7(cEGF:Complement Clr-like EGF-like); PF12661.7(hEGF:Human growth factor-like EGF); PF00008.27(EGF:EGF-like domain)
Pig.10199.1	Pig.10199	RPL35-202	60S ribosomal protein L35 [Sus scrofa]	438.6	525.83	492.65	500.12	527.13	516.37	796.47	827	942.83	GO:0005730(cellular_component:nucleolus); GO:0016020(cellular_component:membrane); GO:0000184(biological_process:nuclear-transcribed mRNA catabolic process, nonsense-mediated decay); GO:0015934(cellular_component:large ribosomal subunit); GO:0005840(cellular_component:ribosome); GO:0022625(cellular_component:cytosolic large ribosomal subunit); GO:0006413(biological_process:translational initiatio…	K02918	RP-L35e, RPL35	map03010(Ribosome)	COG0255(S:Function unknown)	NP_999491.1(60S ribosomal protein L35 [Sus scrofa])	sp|Q29361|RL35_PIG(60S ribosomal protein L35 OS=Sus scrofa OX=9823 GN=RPL35 PE=1 SV=3)	PF00831.23(Ribosomal_L29:Ribosomal L29 protein)
Pig.00854.1	Pig.00854	MRAP2-201	melanocortin-2 receptor accessory protein 2 isoform X1 [Sus scrofa]	0.07	0	0	0.1	0	0.05	0.13	0.26	0.21	GO:0007631(biological_process:feeding behavior); GO:1903077(biological_process:negative regulation of protein localization to plasma membrane); GO:0106072(biological_process:negative regulation of adenylate cyclase-activating G protein-coupled receptor signaling pathway); GO:0005783(cellular_component:endoplasmic reticulum); GO:0106071(biological_process:positive regulation of adenylate cyclase-a…				ENOG4111S4H(U:Intracellular trafficking, secretion, and vesicular transport)	XP_013848111.1(melanocortin-2 receptor accessory protein 2 isoform X1 [Sus scrofa])	sp|Q96G30|MRAP2_HUMAN(Melanocortin-2 receptor accessory protein 2 OS=Homo sapiens OX=9606 GN=MRAP2 PE=1 SV=2)	PF15183.6(MRAP:Melanocortin-2 receptor accessory protein family)
Pig.18430.1	Pig.18430	SORBS3-201	active regulator of SIRT1 [Sus scrofa]	12.25	16.63	16.62	14.67	15.88	12.02	11.36	14.43	14.15	GO:0005654(cellular_component:nucleoplasm); GO:0005829(cellular_component:cytosol); GO:0019899(molecular_function:enzyme binding); GO:0005730(cellular_component:nucleolus)				ENOG41126PZ(J:Translation, ribosomal structure and biogenesis)	XP_003126056.1(active regulator of SIRT1 [Sus scrofa])	sp|A6H7J2|AROS_BOVIN(Active regulator of SIRT1 OS=Bos taurus OX=9913 GN=RPS19BP1 PE=2 SV=1)	PF15684.5(AROS:Active regulator of SIRT1, or 40S ribosomal protein S19-binding 1)
Pig.02464.1	Pig.02464	RASA1-202	ras GTPase-activating protein 1 isoform X1 [Sus scrofa]	7.25	6.27	7.86	3.29	2.36	3.28	3.8	4.43	5.26	GO:0001726(cellular_component:ruffle); GO:0030833(biological_process:regulation of actin filament polymerization); GO:0001953(biological_process:negative regulation of cell-matrix adhesion); GO:0005096(molecular_function:GTPase activator activity); GO:0051020(molecular_function:GTPase binding); GO:0043066(biological_process:negative regulation of apoptotic process); GO:0048514(biological_process:…	K04352	RASA1, RASGAP	map04014(Ras signaling pathway); map04010(MAPK signaling pathway); map04013(MAPK signaling pathway - fly); map04360(Axon guidance)	ENOG410XPU1(P:Inorganic ion transport and metabolism)	XP_003354255.1(ras GTPase-activating protein 1 isoform X1 [Sus scrofa])	sp|P20936|RASA1_HUMAN(Ras GTPase-activating protein 1 OS=Homo sapiens OX=9606 GN=RASA1 PE=1 SV=1)	PF00017.24(SH2:SH2 domain); PF00616.19(RasGAP:GTPase-activator protein for Ras-like GTPase); PF00169.29(PH:PH domain); PF00168.30(C2:C2 domain); PF00018.28(SH3_1:SH3 domain); PF14604.6(SH3_9:Variant SH3 domain); PF14633.6(SH2_2:SH2 domain)
Pig.20450.1	Pig.20450	PRKAR1B-201	cAMP-dependent protein kinase type I-beta regulatory subunit [Sus scrofa]	0.84	1.46	1.08	1.1	1.05	0.88	1.5	2.58	2.46	GO:0050804(biological_process:modulation of synaptic transmission); GO:0030552(molecular_function:cAMP binding); GO:0098978(cellular_component:glutamatergic synapse); GO:2000480(biological_process:negative regulation of cAMP-dependent protein kinase activity); GO:0016301(molecular_function:kinase activity); GO:0007611(biological_process:learning or memory); GO:0004862(molecular_function:cAMP-depe…				COG0664(S:Function unknown)	XP_020941591.1(cAMP-dependent protein kinase type I-beta regulatory subunit [Sus scrofa])	sp|P31321|KAP1_HUMAN(cAMP-dependent protein kinase type I-beta regulatory subunit OS=Homo sapiens OX=9606 GN=PRKAR1B PE=1 SV=4)	PF00027.29(cNMP_binding:Cyclic nucleotide-binding domain); PF02197.17(RIIa:Regulatory subunit of type II PKA R-subunit)
Pig.19854.1	Pig.19854	ZKSCAN2-201	zinc finger protein with KRAB and SCAN domains 2 [Sus scrofa]	0.16	0.19	0.17	0.14	0.15	0.03	0.51	0.78	0.61	GO:0003700(molecular_function:transcription factor activity, sequence-specific DNA binding); GO:0005634(cellular_component:nucleus); GO:0046872(molecular_function:metal ion binding); GO:0003676(molecular_function:nucleic acid binding)	K09229	ZKSCAN		COG5048(S:Function unknown)	XP_003124584.4(zinc finger protein with KRAB and SCAN domains 2 [Sus scrofa])	sp|Q63HK3|ZKSC2_HUMAN(Zinc finger protein with KRAB and SCAN domains 2 OS=Homo sapiens OX=9606 GN=ZKSCAN2 PE=1 SV=2)	PF13837.6(Myb_DNA-bind_4:Myb/SANT-like DNA-binding domain); PF13465.6(zf-H2C2_2:Zinc-finger double domain); PF02023.17(SCAN:SCAN domain); PF00096.26(zf-C2H2:Zinc finger, C2H2 type); PF13894.6(zf-C2H2_4:C2H2-type zinc finger); PF00249.31(Myb_DNA-binding:Myb-like DNA-binding domain)
Pig.19125.1	Pig.19125	C11orf95-201	PREDICTED: uncharacterized protein C11orf95 homolog [Hipposideros armiger]	0.17	0.26	0.39	0.28	0.3	0.42	2	2.61	2.9	GO:0003676(molecular_function:nucleic acid binding)				ENOG410YVVG(S:Function unknown)	XP_003122649.2(LOW QUALITY PROTEIN: uncharacterized protein C11orf95 homolog [Sus scrofa])	sp|C9JLR9|CK095_HUMAN(Uncharacterized protein C11orf95 OS=Homo sapiens OX=9606 GN=C11orf95 PE=1 SV=1)	PF18658.1(zf-C2H2_12:Zinc-finger C2H2-type)
Pig.12381.1	Pig.12381	ARID3A-201	AT-rich interactive domain-containing protein 3A [Sus scrofa]	3.44	4.89	3.17	1.52	1.73	1.68	1.82	2.6	3.03	GO:0005829(cellular_component:cytosol); GO:0045121(cellular_component:membrane raft); GO:0001228(molecular_function:transcriptional activator activity, RNA polymerase II transcription regulatory region sequence-specific binding); GO:0005654(cellular_component:nucleoplasm); GO:0000977(molecular_function:RNA polymerase II regulatory region sequence-specific DNA binding); GO:0003677(molecular_functi…				ENOG410Y2AP(S:Function unknown)	XP_005661421.1(AT-rich interactive domain-containing protein 3A [Sus scrofa])	sp|Q99856|ARI3A_HUMAN(AT-rich interactive domain-containing protein 3A OS=Homo sapiens OX=9606 GN=ARID3A PE=1 SV=2)	PF01388.21(ARID:ARID/BRIGHT DNA binding domain)
MSTRG.4678.1	MSTRG.4678			305.29	435.71	376.26	128.76	128.47	159.58	259.83	331.2	333.18	GO:0008104(biological_process:protein localization); GO:0005829(cellular_component:cytosol); GO:0016234(cellular_component:inclusion body); GO:0005080(molecular_function:protein kinase C binding); GO:0030154(biological_process:cell differentiation); GO:0016236(biological_process:macroautophagy); GO:0019899(molecular_function:enzyme binding); GO:0016235(cellular_component:aggresome); GO:0030017(ce…	K14381	SQSTM1	map04380(Osteoclast differentiation); map04218(Cellular senescence); map04217(Necroptosis); map05418(Fluid shear stress and atherosclerosis)	ENOG410XYAV(S:Function unknown)	ELR58017.1(Sequestosome-1, partial [Bos mutus])	sp|Q13501|SQSTM_HUMAN(Sequestosome-1 OS=Homo sapiens OX=9606 GN=SQSTM1 PE=1 SV=1)	PF16577.5(UBA_5:UBA domain)
Pig.13501.1	Pig.13501	SLC23A2-201	PREDICTED: solute carrier family 23 member 2 isoform X1 [Trichechus manatus latirostris]	3.78	4.44	5.15	2.91	2	2.34	8.93	13.36	10.15	GO:0005737(cellular_component:cytoplasm); GO:0019852(biological_process:L-ascorbic acid metabolic process); GO:0016324(cellular_component:apical plasma membrane); GO:0008520(molecular_function:L-ascorbate:sodium symporter activity); GO:0016021(cellular_component:integral component of membrane); GO:0005886(cellular_component:plasma membrane); GO:0070890(molecular_function:sodium-dependent L-ascorb…	K14611	SLC23A1_2, SVCT1_2		COG2233(F:Nucleotide transport and metabolism)	XP_020932937.1(solute carrier family 23 member 2 isoform X1 [Sus scrofa])	sp|Q9UGH3|S23A2_HUMAN(Solute carrier family 23 member 2 OS=Homo sapiens OX=9606 GN=SLC23A2 PE=1 SV=1)	PF00860.20(Xan_ur_permease:Permease family)
Pig.07332.1	Pig.07332	DGKH-201	LOW QUALITY PROTEIN: diacylglycerol kinase eta [Sus scrofa]	0.48	0.36	0.62	0.73	0.54	0.76	4.84	6.04	5.91	GO:0003951(molecular_function:NAD+ kinase activity); GO:0007205(biological_process:protein kinase C-activating G-protein coupled receptor signaling pathway); GO:0035556(biological_process:intracellular signal transduction); GO:0004143(molecular_function:diacylglycerol kinase activity); GO:0005524(molecular_function:ATP binding)	K00901	dgkA, DGK	map00564(Glycerophospholipid metabolism); map04070(Phosphatidylinositol signaling system); map00561(Glycerolipid metabolism); map05231(Choline metabolism in cancer); map04072(Phospholipase D signaling pathway)	ENOG410XSJR(T:Signal transduction mechanisms)	XP_020921283.1(LOW QUALITY PROTEIN: diacylglycerol kinase eta [Sus scrofa])	sp|Q86XP1|DGKH_HUMAN(Diacylglycerol kinase eta OS=Homo sapiens OX=9606 GN=DGKH PE=1 SV=1)	PF00609.19(DAGK_acc:Diacylglycerol kinase accessory domain); PF00781.24(DAGK_cat:Diacylglycerol kinase catalytic domain); PF07647.17(SAM_2:SAM domain (Sterile alpha motif)); PF00130.22(C1_1:Phorbol esters/diacylglycerol binding domain (C1 domain)); PF00169.29(PH:PH domain); PF00536.30(SAM_1:SAM domain (Sterile alpha motif)); PF15409.6(PH_8:Pleckstrin homology domain)
Pig.06398.1	Pig.06398	KLF2-201	PREDICTED: Krueppel-like factor 2 [Echinops telfairi]	4.33	4.44	5.31	2.71	3.46	4.11	35.92	42.69	34.95	GO:0003676(molecular_function:nucleic acid binding); GO:0003677(molecular_function:DNA binding); GO:0040029(biological_process:regulation of gene expression, epigenetic); GO:0045429(biological_process:positive regulation of nitric oxide biosynthetic process); GO:0043249(biological_process:erythrocyte maturation); GO:0035264(biological_process:multicellular organism growth); GO:1903671(biological_…	K17845	KLF2	map04068(FoxO signaling pathway); map05418(Fluid shear stress and atherosclerosis)	COG5048(S:Function unknown)	NP_001127823.2(Krueppel-like factor 2 [Sus scrofa])	sp|Q9Y5W3|KLF2_HUMAN(Krueppel-like factor 2 OS=Homo sapiens OX=9606 GN=KLF2 PE=1 SV=2)	PF00096.26(zf-C2H2:Zinc finger, C2H2 type); PF13465.6(zf-H2C2_2:Zinc-finger double domain); PF13894.6(zf-C2H2_4:C2H2-type zinc finger)
Pig.21970.1	Pig.21970	CCDC151-201	coiled-coil domain-containing protein 183 [Sus scrofa]	0	0	0.05	0	0	0	0.15	0.03	0.07					ENOG410YH5U(S:Function unknown)	XP_003122382.2(coiled-coil domain-containing protein 183 [Sus scrofa])	sp|Q5T5S1|CC183_HUMAN(Coiled-coil domain-containing protein 183 OS=Homo sapiens OX=9606 GN=CCDC183 PE=2 SV=3)
Pig.02456.1	Pig.02456	POLR3G	DNA-directed RNA polymerase III subunit RPC7 isoform X1 [Sus scrofa]	0.74	1.19	2.47	0.75	0.16	0.7	0.26	0.42	0.76	GO:0003899(molecular_function:DNA-directed RNA polymerase activity); GO:0008283(biological_process:cell proliferation); GO:0006383(biological_process:transcription from RNA polymerase III promoter); GO:0005666(cellular_component:DNA-directed RNA polymerase III complex)	K03024	RPC7, POLR3G	map00240(Pyrimidine metabolism); map03020(RNA polymerase); map00230(Purine metabolism); map04623(Cytosolic DNA-sensing pathway)	ENOG4112311(U:Intracellular trafficking, secretion, and vesicular transport)	XP_003123826.1(DNA-directed RNA polymerase III subunit RPC7 isoform X1 [Sus scrofa])	sp|O15318|RPC7_HUMAN(DNA-directed RNA polymerase III subunit RPC7 OS=Homo sapiens OX=9606 GN=POLR3G PE=1 SV=2)	PF11705.8(RNA_pol_3_Rpc31:DNA-directed RNA polymerase III subunit Rpc31)
Pig.15585.1	Pig.15585	CCM2-204	cerebral cavernous malformations 2 protein isoform X3 [Sus scrofa]	16.17	18.8	19.72	10.6	14	7.43	18.89	23.01	17.05	GO:0001570(biological_process:vasculogenesis); GO:0048839(biological_process:inner ear development); GO:0001701(biological_process:in utero embryonic development); GO:0060039(biological_process:pericardium development); GO:0035264(biological_process:multicellular organism growth); GO:0048845(biological_process:venous blood vessel morphogenesis); GO:0005739(cellular_component:mitochondrion); GO:00…				ENOG410ZBNR(O:Posttranslational modification, protein turnover, chaperones)	XP_013841269.1(cerebral cavernous malformations 2 protein isoform X2 [Sus scrofa])	sp|Q9BSQ5|CCM2_HUMAN(Cerebral cavernous malformations 2 protein OS=Homo sapiens OX=9606 GN=CCM2 PE=1 SV=1)	PF16545.5(CCM2_C:Cerebral cavernous malformation protein, harmonin-homology)
MSTRG.33443.1	MSTRG.33443			0.3	0.4	0.38	0.65	0.59	0.61	0.32	0.4	0.42	GO:0006633(biological_process:fatty acid biosynthetic process); GO:0030111(biological_process:regulation of Wnt signaling pathway); GO:0031018(biological_process:endocrine pancreas development); GO:0030326(biological_process:embryonic limb morphogenesis); GO:0015721(biological_process:bile acid and bile salt transport); GO:0031016(biological_process:pancreas development); GO:0043691(biological_pr…	K08036	TCF1, HNF1A	map04550(Signaling pathways regulating pluripotency of stem cells); map04950(Maturity onset diabetes of the young)	ENOG410ZZZ0(K:Transcription)	NP_001027560.1(hepatocyte nuclear factor 1-alpha [Sus scrofa] >AAY82454.1 hepatic nuclear factor 1 [Sus scrofa])	sp|P20823|HNF1A_HUMAN(Hepatocyte nuclear factor 1-alpha OS=Homo sapiens OX=9606 GN=HNF1A PE=1 SV=2)	PF04812.13(HNF-1B_C:Hepatocyte nuclear factor 1 (HNF-1), beta isoform C terminus); PF04814.13(HNF-1_N:Hepatocyte nuclear factor 1 (HNF-1), N terminus); PF04813.12(HNF-1A_C:Hepatocyte nuclear factor 1 (HNF-1), alpha isoform C terminus); PF00046.29(Homeodomain:Homeodomain)
Pig.16101.1	Pig.16101	LOC101142648	PREDICTED: WD repeat-containing protein 87-like [Bubalus bubalis]	0	0	0	0	0	0	0	0.01	0					ENOG4111K59(S:Function unknown)	ELK12877.1(WD repeat-containing protein 87 [Pteropus alecto])	sp|Q6ZQQ6|WDR87_HUMAN(WD repeat-containing protein 87 OS=Homo sapiens OX=9606 GN=WDR87 PE=1 SV=3)
Pig.14106.1	Pig.14106	WDFY1-202	WD repeat and FYVE domain-containing protein 1 [Sus scrofa]	8	8.37	8.62	4.7	4.95	5.48	10.36	13.58	12.89	GO:0005634(cellular_component:nucleus); GO:0005829(cellular_component:cytosol); GO:0005545(molecular_function:1-phosphatidylinositol binding); GO:0034145(biological_process:positive regulation of toll-like receptor 4 signaling pathway); GO:0034141(biological_process:positive regulation of toll-like receptor 3 signaling pathway); GO:0046872(molecular_function:metal ion binding); GO:0005769(cellula…				COG2319(J:Translation, ribosomal structure and biogenesis)	NP_001104749.1(WD repeat and FYVE domain-containing protein 1 isoform 1 [Mus musculus])	sp|E9Q4P1|WDFY1_MOUSE(WD repeat and FYVE domain-containing protein 1 OS=Mus musculus OX=10090 GN=Wdfy1 PE=1 SV=1)	PF00400.32(WD40:WD domain, G-beta repeat); PF01363.21(FYVE:FYVE zinc finger)
Pig.01314.1	Pig.01314	SMKR1-201	small lysine-rich protein 1 [Sus scrofa]	0.12	0.06	0.24	0.12	0.18	0.08	0.95	1.01	1.73					ENOG410Z5SG(S:Function unknown)	XP_003484072.1(small lysine-rich protein 1 [Sus scrofa])	sp|H3BMG3|SMKR1_HUMAN(Small lysine-rich protein 1 OS=Homo sapiens OX=9606 GN=SMKR1 PE=4 SV=1)
Pig.16596.1	Pig.16596	GREM1-201	gremlin-1 isoform X2 [Sus scrofa]	0	0	0	0	0.04	0	0.82	2.05	1					ENOG4111HEF(Z:Cytoskeleton)	XP_020953969.1(gremlin-1 isoform X2 [Sus scrofa])	sp|O60565|GREM1_HUMAN(Gremlin-1 OS=Homo sapiens OX=9606 GN=GREM1 PE=1 SV=1)	PF03045.15(DAN:DAN domain)
Pig.21516.1	Pig.21516	ZNF133-201	PREDICTED: zinc finger protein 589, partial [Physeter catodon]	0.44	0.21	0	0	0	0.14	0	0	0	GO:0006355(biological_process:regulation of transcription, DNA-templated); GO:0046872(molecular_function:metal ion binding); GO:0003676(molecular_function:nucleic acid binding)	K09228	KRAB		COG5048(O:Posttranslational modification, protein turnover, chaperones)	XP_028334574.1(LOW QUALITY PROTEIN: zinc finger protein 589 [Physeter catodon])	sp|Q86UQ0|ZN589_HUMAN(Zinc finger protein 589 OS=Homo sapiens OX=9606 GN=ZNF589 PE=1 SV=1)
Pig.14982.1	Pig.14982	STAU1-201	double-stranded RNA-binding protein Staufen homolog 1 isoform X1 [Sus scrofa]	24.85	30.91	22.28	14.12	12.74	13.19	32.23	43.65	33.31	GO:0003723(molecular_function:RNA binding)	K17597	STAU		ENOG410XSCK(K:Transcription)	XP_020933154.1(double-stranded RNA-binding protein Staufen homolog 1 isoform X1 [Sus scrofa])	sp|D2GVP7|STAU1_AILME(Double-stranded RNA-binding protein Staufen homolog 1 OS=Ailuropoda melanoleuca OX=9646 GN=STAU1 PE=3 SV=1)	PF16482.5(Staufen_C:Staufen C-terminal domain); PF00035.26(dsrm:Double-stranded RNA binding motif); PF14709.7(DND1_DSRM:double strand RNA binding domain from DEAD END PROTEIN 1)
Pig.17353.1	Pig.17353	NUDT1-201	7,8-dihydro-8-oxoguanine triphosphatase [Sus scrofa]	2.54	3.74	4.52	2.74	1.94	2.05	2.97	4.15	3.5	GO:0047693(molecular_function:ATP diphosphatase activity); GO:0006281(biological_process:DNA repair); GO:0005634(cellular_component:nucleus); GO:0008413(molecular_function:8-oxo-7,8-dihydroguanosine triphosphate pyrophosphatase activity); GO:0003924(molecular_function:GTPase activity); GO:0006203(biological_process:dGTP catabolic process); GO:0042262(biological_process:DNA protection); GO:0046061…	K17816	NUDT1, MTH1		COG0494(S:Function unknown)	NP_001231497.1(7,8-dihydro-8-oxoguanine triphosphatase [Sus scrofa])	sp|P36639|8ODP_HUMAN(7,8-dihydro-8-oxoguanine triphosphatase OS=Homo sapiens OX=9606 GN=NUDT1 PE=1 SV=3)	PF00293.28(NUDIX:NUDIX domain)
Pig.10419.1	Pig.10419	TAF1	transcription initiation factor TFIID subunit 1 isoform X3 [Sus scrofa]	8.07	8.34	10.02	6.82	5	7.41	9.58	9.87	12.07	GO:0004674(molecular_function:protein serine/threonine kinase activity); GO:0006355(biological_process:regulation of transcription, DNA-templated); GO:0006352(biological_process:DNA-templated transcription, initiation); GO:0003677(molecular_function:DNA binding); GO:0005669(cellular_component:transcription factor TFIID complex); GO:0003743(molecular_function:translation initiation factor activity)	K03125	TAF1	map03022(Basal transcription factors)	COG5076(E:Amino acid transport and metabolism)	XP_020935611.1(transcription initiation factor TFIID subunit 1 isoform X3 [Sus scrofa])	sp|Q80UV9|TAF1_MOUSE(Transcription initiation factor TFIID subunit 1 OS=Mus musculus OX=10090 GN=Taf1 PE=1 SV=2)	PF12157.8(DUF3591:Protein of unknown function (DUF3591)); PF00439.25(Bromodomain:Bromodomain); PF09247.11(TBP-binding:TATA box-binding protein binding); PF15288.6(zf-CCHC_6:Zinc knuckle)
Pig.14138.1	Pig.14138	PIRT-201	phosphoinositide-interacting protein [Sus scrofa]	0	0.15	0	0.1	0	0	0	0	0	GO:0016021(cellular_component:integral component of membrane)				ENOG410YYIW(U:Intracellular trafficking, secretion, and vesicular transport)	XP_020921941.1(phosphoinositide-interacting protein [Sus scrofa])	sp|P0C851|PIRT_HUMAN(Phosphoinositide-interacting protein OS=Homo sapiens OX=9606 GN=PIRT PE=2 SV=2)	PF15099.6(PIRT:Phosphoinositide-interacting protein family); PF16311.5(TMEM100:Transmembrane protein 100); PF14927.6(Neurensin:Neurensin); PF07332.11(Phage_holin_3_6:Putative Actinobacterial Holin-X, holin superfamily III)
Pig.15119.1	Pig.15119	AIRE-202	PREDICTED: autoimmune regulator [Equus asinus]	0.02	0	0	0	0	0	0.02	0	0		K10603	AIRE	map04120(Ubiquitin mediated proteolysis); map05340(Primary immunodeficiency)	ENOG410Y1KU(S:Function unknown); ENOG410XQQA(S:Function unknown)	XP_020925516.1(LOW QUALITY PROTEIN: autoimmune regulator [Sus scrofa])	sp|O43918|AIRE_HUMAN(Autoimmune regulator OS=Homo sapiens OX=9606 GN=AIRE PE=1 SV=1)	PF03172.13(HSR:HSR domain); PF00628.29(PHD:PHD-finger); PF01342.21(SAND:SAND domain)
Pig.23156.1	Pig.23156	UGT2B4	LOW QUALITY PROTEIN: UDP-glucuronosyltransferase 2B31 [Sus scrofa]	1.3	1.28	0.3	0.15	0.11	0.06	0	0	0	GO:0015020(molecular_function:glucuronosyltransferase activity); GO:0008194(molecular_function:UDP-glycosyltransferase activity); GO:0016021(cellular_component:integral component of membrane); GO:0043231(cellular_component:intracellular membrane-bounded organelle)	K00699	UGT	map05204(Chemical carcinogenesis); map00983(Drug metabolism - other enzymes); map00982(Drug metabolism - cytochrome P450); map00980(Metabolism of xenobiotics by cytochrome P450); map00040(Pentose and glucuronate interconversions); map00860(Porphyrin and chlorophyll metabolism); map00053(Ascorbate and aldarate metabolism); map00830(Retinol metabolism); map00140(Steroid hormone biosynthesis)	COG1819(S:Function unknown)	XP_013853463.2(LOW QUALITY PROTEIN: UDP-glucuronosyltransferase 2B31 [Sus scrofa])	sp|Q6K1J1|UDB31_CANLF(UDP-glucuronosyltransferase 2B31 OS=Canis lupus familiaris OX=9615 GN=UGT2B31 PE=1 SV=1)	PF00201.18(UDPGT:UDP-glucoronosyl and UDP-glucosyl transferase)
MSTRG.29942.2	MSTRG.29942			0	0	0	0	0	0	0	0	0	GO:0005882(cellular_component:intermediate filament); GO:0005198(molecular_function:structural molecule activity)	K07604	KRT1	map04915(Estrogen signaling pathway)	ENOG410YDXS(Z:Cytoskeleton)	XP_003131508.1(keratin, type I cytoskeletal 10 isoform X1 [Sus scrofa])	sp|Q6EIZ0|K1C10_CANLF(Keratin, type I cytoskeletal 10 OS=Canis lupus familiaris OX=9615 GN=KRT10 PE=2 SV=1)	PF00038.21(Filament:Intermediate filament protein)
Pig.16545.1	Pig.16545	ATF7IP2-201	activating transcription factor 7-interacting protein 2 isoform X1 [Sus scrofa]	0.29	0.15	0.35	0.13	0.06	0.1	0.28	0.3	0.07					ENOG4111C5S(K:Transcription)	XP_020942302.1(activating transcription factor 7-interacting protein 2 isoform X1 [Sus scrofa])	sp|Q5U623|MCAF2_HUMAN(Activating transcription factor 7-interacting protein 2 OS=Homo sapiens OX=9606 GN=ATF7IP2 PE=1 SV=2)	PF16788.5(ATF7IP_BD:ATF-interacting protein binding domain); PF16794.5(fn3_4:Fibronectin-III type domain)
Pig.09252.1	Pig.09252	MMUT-201	PREDICTED: methylmalonyl-CoA mutase, mitochondrial [Ovis aries]	91.97	91.27	81.92	32.41	31.07	40.7	26.24	30.97	44.35	GO:0031419(molecular_function:cobalamin binding); GO:0004494(molecular_function:methylmalonyl-CoA mutase activity); GO:0050667(biological_process:homocysteine metabolic process); GO:0072341(molecular_function:modified amino acid binding); GO:0003924(molecular_function:GTPase activity); GO:0043547(biological_process:positive regulation of GTPase activity); GO:0005759(cellular_component:mitochondri…	K01847	MUT	map00630(Glyoxylate and dicarboxylate metabolism); map00280(Valine, leucine and isoleucine degradation); map00640(Propanoate metabolism)	COG1884(I:Lipid transport and metabolism)	XP_004018923.1(methylmalonyl-CoA mutase, mitochondrial [Ovis aries])	sp|Q8MI68|MUTA_PIG(Methylmalonyl-CoA mutase, mitochondrial OS=Sus scrofa OX=9823 GN=MMUT PE=2 SV=2)	PF01642.22(MM_CoA_mutase:Methylmalonyl-CoA mutase); PF02310.19(B12-binding:B12 binding domain)
Pig.08931.1	Pig.08931	FBXO25-205	F-box only protein 25 isoform X3 [Sus scrofa]	2.64	1.72	2.2	1.75	1.3	2.17	7.49	9.48	11.79	GO:0005634(cellular_component:nucleus); GO:0000151(cellular_component:ubiquitin ligase complex); GO:0003779(molecular_function:actin binding); GO:0016567(biological_process:protein ubiquitination); GO:0019005(cellular_component:SCF ubiquitin ligase complex); GO:0004842(molecular_function:ubiquitin-protein transferase activity)	K10305	FBXO25_32	map04068(FoxO signaling pathway)	ENOG410YPWK(S:Function unknown)	XP_020931879.1(F-box only protein 25 isoform X3 [Sus scrofa])	sp|Q4R372|FBX25_MACFA(F-box only protein 25 OS=Macaca fascicularis OX=9541 GN=FBXO25 PE=2 SV=1)	PF06881.11(Elongin_A:RNA polymerase II transcription factor SIII (Elongin) subunit A)
Pig.05480.1	Pig.05480	IFNG-201	interferon gamma precursor [Sus scrofa]	0.42	0.2	0.11	0.28	0.06	0.07	0.1	0.26	0	GO:0060552(biological_process:positive regulation of fructose 1,6-bisphosphate metabolic process); GO:0060550(biological_process:positive regulation of fructose 1,6-bisphosphate 1-phosphatase activity); GO:0005125(molecular_function:cytokine activity); GO:0051044(biological_process:positive regulation of membrane protein ectodomain proteolysis); GO:0060559(biological_process:positive regulation o…	K04687	IFNG	map05140(Leishmaniasis); map05142(Chagas disease (American trypanosomiasis)); map04650(Natural killer cell mediated cytotoxicity); map04657(IL-17 signaling pathway); map05145(Toxoplasmosis); map05146(Amoebiasis); map05332(Graft-versus-host disease); map04350(TGF-beta signaling pathway); map04658(Th1 and Th2 cell differentiation); map05164(Influenza A); map05168(Herpes simplex infection); map05143…	ENOG410Z8I5(B:Chromatin structure and dynamics)	NP_999113.1(interferon gamma precursor [Sus scrofa])	sp|P17803|IFNG_PIG(Interferon gamma OS=Sus scrofa OX=9823 GN=IFNG PE=2 SV=1)	PF00714.17(IFN-gamma:Interferon gamma); PF05918.11(API5:Apoptosis inhibitory protein 5 (API5))
Pig.23171.1	Pig.23171	AKAP17A	A-kinase anchor protein 17A [Sus scrofa]	3.73	4.75	6.03	4.06	3.21	3.73	7.03	8.76	10.16	GO:0043484(biological_process:regulation of RNA splicing); GO:0051018(molecular_function:protein kinase A binding); GO:0016301(molecular_function:kinase activity); GO:0003676(molecular_function:nucleic acid binding)	K13169	SFRS17		ENOG410XQIN(S:Function unknown)	XP_020937022.1(A-kinase anchor protein 17A [Sus scrofa])	sp|Q02040|AK17A_HUMAN(A-kinase anchor protein 17A OS=Homo sapiens OX=9606 GN=AKAP17A PE=1 SV=2)
Pig.00173.1	Pig.00173	DLX2-201	homeobox protein DLX-2 [Sus scrofa]	0	0	0	0.03	0	0.03	0	0.1	0	GO:0048715(biological_process:negative regulation of oligodendrocyte differentiation); GO:0030154(biological_process:cell differentiation); GO:0048755(biological_process:branching morphogenesis of a nerve); GO:0021766(biological_process:hippocampus development); GO:0021882(biological_process:regulation of transcription from RNA polymerase II promoter involved in forebrain neuron fate commitment);…	K18488	DLX2		ENOG410ZHZR(B:Chromatin structure and dynamics)	XP_003133525.1(homeobox protein DLX-2 [Sus scrofa])	sp|Q07687|DLX2_HUMAN(Homeobox protein DLX-2 OS=Homo sapiens OX=9606 GN=DLX2 PE=1 SV=2)	PF00046.29(Homeodomain:Homeodomain); PF12413.8(DLL_N:Homeobox protein distal-less-like N terminal)
Pig.18624.1	Pig.18624	MTUS1-201	uncharacterized protein LOC110255905 [Sus scrofa]	0	0	0	0.04	0.2	0.34	0.1	0.2	0.28	GO:0003779(molecular_function:actin binding); GO:0016459(cellular_component:myosin complex); GO:0003774(molecular_function:motor activity); GO:0005524(molecular_function:ATP binding)					XP_020921970.1(uncharacterized protein LOC110255905 [Sus scrofa])
Pig.00050.1	Pig.00050	SATB2-202	DNA-binding protein SATB2 isoform X1 [Microcebus murinus]	1.69	1.98	1.71	0.48	0.44	0.63	0.03	0.25	0.05	GO:0021902(biological_process:commitment of neuronal cell to specific neuron type in forebrain); GO:0048704(biological_process:embryonic skeletal system morphogenesis); GO:0051216(biological_process:cartilage development); GO:0009880(biological_process:embryonic pattern specification); GO:0006338(biological_process:chromatin remodeling); GO:0000122(biological_process:negative regulation of transc…				ENOG41113K2(K:Transcription)	XP_012594554.1(DNA-binding protein SATB2 isoform X1 [Microcebus murinus])	sp|Q9UPW6|SATB2_HUMAN(DNA-binding protein SATB2 OS=Homo sapiens OX=9606 GN=SATB2 PE=1 SV=2)	PF02376.15(CUT:CUT domain); PF16557.5(CUTL:CUT1-like DNA-binding domain of SATB); PF16534.5(ULD:Ubiquitin-like oligomerisation domain of SATB); PF00046.29(Homeodomain:Homeodomain)
Pig.03030.1	Pig.03030	TRIM62-201	E3 ubiquitin-protein ligase TRIM62 [Macaca mulatta]	0.31	0.46	0.19	0.39	0.39	0.5	1.97	2.88	2.25	GO:0005737(cellular_component:cytoplasm); GO:0051092(biological_process:positive regulation of NF-kappaB transcription factor activity); GO:0051091(biological_process:positive regulation of sequence-specific DNA binding transcription factor activity); GO:0010719(biological_process:negative regulation of epithelial to mesenchymal transition); GO:1902186(biological_process:regulation of viral relea…	K12030	TRIM62		ENOG410XNZK(S:Function unknown)	NP_001244681.1(E3 ubiquitin-protein ligase TRIM62 [Macaca mulatta])	sp|Q80V85|TRI62_MOUSE(E3 ubiquitin-protein ligase TRIM62 OS=Mus musculus OX=10090 GN=Trim62 PE=2 SV=1)	PF13765.6(PRY:SPRY-associated domain); PF00622.28(SPRY:SPRY domain); PF15227.6(zf-C3HC4_4:zinc finger of C3HC4-type, RING); PF13445.6(zf-RING_UBOX:RING-type zinc-finger); PF00097.25(zf-C3HC4:Zinc finger, C3HC4 type (RING finger)); PF13923.6(zf-C3HC4_2:Zinc finger, C3HC4 type (RING finger)); PF13639.6(zf-RING_2:Ring finger domain); PF13920.6(zf-C3HC4_3:Zinc finger, C3HC4 type (RING finger)); PF006…
Pig.00646.1	Pig.00646	ARHGEF38-201	rho guanine nucleotide exchange factor 38 isoform X1 [Sus scrofa]	0.03	0	0.05	0.04	0.04	0.03	0	0	0	GO:0005089(molecular_function:Rho guanyl-nucleotide exchange factor activity); GO:0005737(cellular_component:cytoplasm); GO:0035023(biological_process:regulation of Rho protein signal transduction)	K20711	ARHGEF38		ENOG410XT9S(T:Signal transduction mechanisms); ENOG410XWZ2(T:Signal transduction mechanisms)	XP_003482511.3(rho guanine nucleotide exchange factor 38 isoform X1 [Sus scrofa])	sp|Q9NXL2|ARH38_HUMAN(Rho guanine nucleotide exchange factor 38 OS=Homo sapiens OX=9606 GN=ARHGEF38 PE=2 SV=2)	PF00621.20(RhoGEF:RhoGEF domain); PF07653.17(SH3_2:Variant SH3 domain); PF14604.6(SH3_9:Variant SH3 domain); PF00018.28(SH3_1:SH3 domain)
Pig.16893.1	Pig.16893	PDSS1-201	LOW QUALITY PROTEIN: decaprenyl-diphosphate synthase subunit 1 [Sus scrofa]	0.96	0.85	0.8	0.38	0.48	0.35	0.83	1.64	1.3	GO:0016740(molecular_function:transferase activity); GO:0008299(biological_process:isoprenoid biosynthetic process)	K12504	PDSS1	map00900(Terpenoid backbone biosynthesis)	COG0142(H:Coenzyme transport and metabolism)	XP_005668199.2(LOW QUALITY PROTEIN: decaprenyl-diphosphate synthase subunit 1 [Sus scrofa])	sp|Q5T2R2|DPS1_HUMAN(Decaprenyl-diphosphate synthase subunit 1 OS=Homo sapiens OX=9606 GN=PDSS1 PE=1 SV=1)	PF00348.17(polyprenyl_synt:Polyprenyl synthetase)
Pig.18311.1	Pig.18311	Srsf2	NR:NA	29	48.63	39.35	18.04	17.67	21.97	40.85	46.45	59.45	GO:0005737(cellular_component:cytoplasm); GO:0036002(molecular_function:pre-mRNA binding); GO:0000381(biological_process:regulation of alternative mRNA splicing, via spliceosome); GO:0045292(biological_process:mRNA cis splicing, via spliceosome); GO:0016607(cellular_component:nuclear speck); GO:0003723(molecular_function:RNA binding); GO:0005634(cellular_component:nucleus); GO:0005829(cellular_co…	K12891	SFRS2	map05168(Herpes simplex infection); map03040(Spliceosome)	ENOG4111NJ8(S:Function unknown)	BAD96972.1(splicing factor, arginine/serine-rich 2 variant, partial [Homo sapiens])	sp|Q3MHR5|SRSF2_BOVIN(Serine/arginine-rich splicing factor 2 OS=Bos taurus OX=9913 GN=SRSF2 PE=2 SV=3)	PF00076.22(RRM_1:RNA recognition motif. (a.k.a. RRM, RBD, or RNP domain))
Pig.02525.1	Pig.02525	GFM2-201	ribosome-releasing factor 2, mitochondrial isoform X1 [Sus scrofa]	7.34	7.14	8.54	4.14	2.57	4.59	3.66	3.4	3.53	GO:0032790(biological_process:ribosome disassembly); GO:0003924(molecular_function:GTPase activity); GO:0032543(biological_process:mitochondrial translation); GO:0005739(cellular_component:mitochondrion); GO:0005525(molecular_function:GTP binding)	K02355	fusA, GFM, EFG		COG0480(J:Translation, ribosomal structure and biogenesis)	XP_013850350.1(ribosome-releasing factor 2, mitochondrial isoform X1 [Sus scrofa])	sp|A6QNM2|RRF2M_BOVIN(Ribosome-releasing factor 2, mitochondrial OS=Bos taurus OX=9913 GN=GFM2 PE=2 SV=1)	PF00009.27(GTP_EFTU:Elongation factor Tu GTP binding domain); PF14492.6(EFG_II:Elongation Factor G, domain II); PF00679.24(EFG_C:Elongation factor G C-terminus); PF03764.18(EFG_IV:Elongation factor G, domain IV); PF03144.25(GTP_EFTU_D2:Elongation factor Tu domain 2); PF16658.5(RF3_C:Class II release factor RF3, C-terminal domain); PF01926.23(MMR_HSR1:50S ribosome-binding GTPase)
Pig.01394.1	Pig.01394	LRRN3-201	leucine-rich repeat neuronal protein 3 [Sus scrofa]	3.22	4.56	2.59	1.58	1.81	2.97	0.36	0.75	0.64	GO:0016021(cellular_component:integral component of membrane); GO:0005615(cellular_component:extracellular space); GO:0051965(biological_process:positive regulation of synapse assembly); GO:0031012(cellular_component:extracellular matrix)				COG4886(S:Function unknown)	XP_003134818.1(leucine-rich repeat neuronal protein 3 [Sus scrofa])	sp|Q5R482|LRRN3_PONAB(Leucine-rich repeat neuronal protein 3 OS=Pongo abelii OX=9601 GN=LRRN3 PE=2 SV=1)	PF13855.6(LRR_8:Leucine rich repeat); PF12799.7(LRR_4:Leucine Rich repeats (2 copies)); PF13306.6(LRR_5:BspA type Leucine rich repeat region (6 copies)); PF07679.16(I-set:Immunoglobulin I-set domain); PF14580.6(LRR_9:Leucine-rich repeat); PF13927.6(Ig_3:Immunoglobulin domain); PF00041.21(fn3:Fibronectin type III domain); PF13895.6(Ig_2:Immunoglobulin domain); PF01462.18(LRRNT:Leucine rich repeat …
Pig.17827.1	Pig.17827	HDAC11-206	histone deacetylase 11 isoform X1 [Sus scrofa]	9.08	9.85	7.43	5.72	5.85	5.33	3.88	4.21	5.06	GO:0016787(molecular_function:hydrolase activity)	K11418	HDAC11	map05034(Alcoholism); map05165(Human papillomavirus infection); map05203(Viral carcinogenesis)	COG0123(O:Posttranslational modification, protein turnover, chaperones)	XP_020925043.1(histone deacetylase 11 isoform X1 [Sus scrofa])	sp|Q9GKU5|HDA11_MACFA(Histone deacetylase 11 OS=Macaca fascicularis OX=9541 GN=HDAC11 PE=2 SV=2)	PF00850.19(Hist_deacetyl:Histone deacetylase domain)
Pig.10902.1	Pig.10902	PDE12-201	2',5'-phosphodiesterase 12 [Sus scrofa]	3.58	5.05	5.03	1.99	1.35	1.84	3.64	4.31	2.76	GO:0000288(biological_process:nuclear-transcribed mRNA catabolic process, deadenylation-dependent decay); GO:0071359(biological_process:cellular response to dsRNA); GO:0060548(biological_process:negative regulation of cell death); GO:0071346(biological_process:cellular response to interferon-gamma); GO:0045070(biological_process:positive regulation of viral genome replication); GO:0005739(cellula…	K19612	PDE12		COG5239(S:Function unknown)	XP_001926497.2(2',5'-phosphodiesterase 12 [Sus scrofa])	sp|Q6L8Q7|PDE12_HUMAN(2',5'-phosphodiesterase 12 OS=Homo sapiens OX=9606 GN=PDE12 PE=1 SV=2)	PF03372.23(Exo_endo_phos:Endonuclease/Exonuclease/phosphatase family)
Pig.06024.1	Pig.06024	PCLO	proline-rich protein 2-like [Sus scrofa]	0	0	0.04	0	0	0	0	0	0						XP_020936263.1(proline-rich protein 2-like [Sus scrofa])
Pig.16123.1	Pig.16123	RINL-201	LOW QUALITY PROTEIN: ras and Rab interactor-like protein [Sus scrofa]	0.41	0.4	0.6	0.52	0.46	0.37	0.67	0.76	1.06					ENOG410ZZW5(K:Transcription)	XP_020950009.1(LOW QUALITY PROTEIN: ras and Rab interactor-like protein [Sus scrofa])	sp|Q6ZS11|RINL_HUMAN(Ras and Rab interactor-like protein OS=Homo sapiens OX=9606 GN=RINL PE=2 SV=2)	PF02204.18(VPS9:Vacuolar sorting protein 9 (VPS9) domain)
Pig.19718.1	Pig.19718	C6orf132-201	uncharacterized protein C6orf132 homolog isoform X1 [Sus scrofa]	4.82	7.08	4.39	2.37	3.87	3.54	0.33	0.27	0.42					ENOG4111CP9(S:Function unknown)	XP_020954351.1(uncharacterized protein C6orf132 homolog isoform X1 [Sus scrofa])	sp|Q5T0Z8|CF132_HUMAN(Uncharacterized protein C6orf132 OS=Homo sapiens OX=9606 GN=C6orf132 PE=1 SV=4)
Pig.03459.1	Pig.03459	NHLRC3-202	PREDICTED: NHL repeat-containing protein 3 [Camelus bactrianus]	11.97	15.06	13.26	7.43	4.35	6.54	10.78	10.18	10.89					ENOG410ZCFR(S:Function unknown)	XP_010980721.1(PREDICTED: NHL repeat-containing protein 3 [Camelus dromedarius])	sp|Q5JS37|NHLC3_HUMAN(NHL repeat-containing protein 3 OS=Homo sapiens OX=9606 GN=NHLRC3 PE=2 SV=1)	PF01436.21(NHL:NHL repeat); PF08450.12(SGL:SMP-30/Gluconolactonase/LRE-like region)
Pig.02522.1	Pig.02522	GCNT4-201	beta-1,3-galactosyl-O-glycosyl-glycoprotein beta-1,6-N-acetylglucosaminyltransferase 4 isoform X2 [Sus scrofa]	1.77	1.53	0.71	0.52	1.02	1.07	0.26	0.43	0.38	GO:0048872(biological_process:homeostasis of number of cells); GO:0016021(cellular_component:integral component of membrane); GO:0016020(cellular_component:membrane); GO:0042403(biological_process:thyroid hormone metabolic process); GO:0048729(biological_process:tissue morphogenesis); GO:0060993(biological_process:kidney morphogenesis); GO:0008375(molecular_function:acetylglucosaminyltransferase …	K09663	GCNT4	map00512(Mucin type O-glycan biosynthesis)	ENOG410XQ7M(J:Translation, ribosomal structure and biogenesis)	XP_013850356.1(beta-1,3-galactosyl-O-glycosyl-glycoprotein beta-1,6-N-acetylglucosaminyltransferase 4 isoform X2 [Sus scrofa])	sp|Q9P109|GCNT4_HUMAN(Beta-1,3-galactosyl-O-glycosyl-glycoprotein beta-1,6-N-acetylglucosaminyltransferase 4 OS=Homo sapiens OX=9606 GN=GCNT4 PE=2 SV=1)	PF02485.21(Branch:Core-2/I-Branching enzyme); PF16216.5(GxGYxYP_N:GxGYxY sequence motif in domain of unknown function N-terminal)
Pig.03576.1	Pig.03576	RASGRF1-201	ras-specific guanine nucleotide-releasing factor 1 isoform X2 [Sus scrofa]	0	0	0.02	0.01	0.02	0.02	0	0	0	GO:0005089(molecular_function:Rho guanyl-nucleotide exchange factor activity); GO:0008283(biological_process:cell proliferation); GO:0005829(cellular_component:cytosol); GO:0035023(biological_process:regulation of Rho protein signal transduction); GO:0090630(biological_process:activation of GTPase activity); GO:0030426(cellular_component:growth cone); GO:0035254(molecular_function:glutamate recep…	K04349	RASGRF1	map04014(Ras signaling pathway); map04510(Focal adhesion); map04010(MAPK signaling pathway)	ENOG410XPWA(T:Signal transduction mechanisms)	XP_003128494.3(ras-specific guanine nucleotide-releasing factor 1 isoform X2 [Sus scrofa])	sp|Q13972|RGRF1_HUMAN(Ras-specific guanine nucleotide-releasing factor 1 OS=Homo sapiens OX=9606 GN=RASGRF1 PE=1 SV=2)	PF00617.19(RasGEF:RasGEF domain); PF00621.20(RhoGEF:RhoGEF domain); PF00169.29(PH:PH domain); PF00618.20(RasGEF_N:RasGEF N-terminal motif)
Pig.18898.1	Pig.18898	Ccdc30	coiled-coil domain-containing protein 30 [Sus scrofa]	2.27	2.39	1.86	2.67	2.29	2.21	0.27	0.29	0.19					ENOG41115HA(S:Function unknown)	XP_020952582.1(coiled-coil domain-containing protein 30 [Sus scrofa])	sp|Q5VVM6|CCD30_HUMAN(Coiled-coil domain-containing protein 30 OS=Homo sapiens OX=9606 GN=CCDC30 PE=2 SV=1)	PF15742.5(DUF4686:Domain of unknown function (DUF4686))
Pig.12979.1	Pig.12979	CNTRL	centriolin isoform X1 [Sus scrofa]	4.77	4.85	4.55	1.96	1.23	1.51	1.56	2.08	3.54	GO:0005815(cellular_component:microtubule organizing center); GO:0051493(biological_process:regulation of cytoskeleton organization); GO:0008092(molecular_function:cytoskeletal protein binding)	K16770	CNTRL		ENOG410ZX4Y(S:Function unknown)	XP_020923849.1(centriolin isoform X1 [Sus scrofa])	sp|Q7Z7A1|CNTRL_HUMAN(Centriolin OS=Homo sapiens OX=9606 GN=CNTRL PE=1 SV=2)	PF12799.7(LRR_4:Leucine Rich repeats (2 copies)); PF14580.6(LRR_9:Leucine-rich repeat); PF13855.6(LRR_8:Leucine rich repeat)
Pig.00634.1	Pig.00634	NFKB1-201	nuclear factor of kappa light polypeptide enhancer in B-cells 1 [Sus scrofa]	10.12	10.33	11.02	5.04	4.29	4.97	12.66	14.74	12.96	GO:0005737(cellular_component:cytoplasm); GO:0044212(molecular_function:transcription regulatory region DNA binding); GO:0000122(biological_process:negative regulation of transcription from RNA polymerase II promoter); GO:0003700(molecular_function:transcription factor activity, sequence-specific DNA binding); GO:0005634(cellular_component:nucleus); GO:0006357(biological_process:regulation of tra…	K02580	NFKB1	map05140(Leishmaniasis); map05166(Human T-cell leukemia virus 1 infection); map05142(Chagas disease (American trypanosomiasis)); map05165(Human papillomavirus infection); map04657(IL-17 signaling pathway); map05145(Toxoplasmosis); map05146(Amoebiasis); map05161(Hepatitis B); map04014(Ras signaling pathway); map04659(Th17 cell differentiation); map04658(Th1 and Th2 cell differentiation); map04010(…	COG0666(G:Carbohydrate transport and metabolism)	ABU63584.1(nuclear factor of kappa light polypeptide enhancer in B-cells 1 [Sus scrofa])	sp|Q6F3J0|NFKB1_CANLF(Nuclear factor NF-kappa-B p105 subunit OS=Canis lupus familiaris OX=9615 GN=NFKB1 PE=2 SV=2)	PF00554.22(RHD_DNA_bind:Rel homology DNA-binding domain); PF16179.5(RHD_dimer:Rel homology dimerisation domain); PF12796.7(Ank_2:Ankyrin repeats (3 copies)); PF13637.6(Ank_4:Ankyrin repeats (many copies)); PF00023.30(Ank:Ankyrin repeat); PF13857.6(Ank_5:Ankyrin repeats (many copies)); PF00531.22(Death:Death domain)
Pig.13629.1	Pig.13629	TCAF1-204	TRPM8 channel-associated factor 1 isoform X1 [Sus scrofa]	1.5	1.78	1.54	0.81	0.83	1.7	9.21	10.06	11.43	GO:0030336(biological_process:negative regulation of cell migration); GO:0044325(molecular_function:ion channel binding); GO:0005886(cellular_component:plasma membrane); GO:1901529(biological_process:positive regulation of anion channel activity); GO:0090314(biological_process:positive regulation of protein targeting to membrane)				ENOG410YE3A(S:Function unknown)	XP_003134613.1(TRPM8 channel-associated factor 1 isoform X1 [Sus scrofa])	sp|A5PJN5|TCAF1_BOVIN(TRPM8 channel-associated factor 1 OS=Bos taurus OX=9913 GN=TCAF1 PE=2 SV=1)	PF13402.6(Peptidase_M60:Peptidase M60, enhancin and enhancin-like); PF17291.2(M60-like_N:N-terminal domain of M60-like peptidases)
Pig.10893.1	Pig.10893	PXK-201	PX domain-containing protein kinase-like protein isoform X1 [Sus scrofa]	15.4	13.24	11.67	8.55	6.27	8.24	20.77	23.17	18.86	GO:0016301(molecular_function:kinase activity); GO:0032991(cellular_component:macromolecular complex); GO:0035091(molecular_function:phosphatidylinositol binding); GO:0005829(cellular_component:cytosol); GO:0005886(cellular_component:plasma membrane); GO:0050804(biological_process:modulation of synaptic transmission); GO:0003779(molecular_function:actin binding); GO:0006954(biological_process:inf…	K17543	PXK		ENOG410Z20X(T:Signal transduction mechanisms)	XP_003132324.1(PX domain-containing protein kinase-like protein isoform X1 [Sus scrofa])	sp|Q7Z7A4|PXK_HUMAN(PX domain-containing protein kinase-like protein OS=Homo sapiens OX=9606 GN=PXK PE=1 SV=1)	PF00787.24(PX:PX domain); PF00069.25(Pkinase:Protein kinase domain); PF02205.20(WH2:WH2 motif); PF07714.17(Pkinase_Tyr:Protein tyrosine kinase)
Pig.05021.1	Pig.05021	KIF5B-201	kinesin-1 heavy chain [Sus scrofa]	11.24	8.92	12.54	3.09	1.54	1.86	5.93	8.45	10.13	GO:0042391(biological_process:regulation of membrane potential); GO:0071346(biological_process:cellular response to interferon-gamma); GO:0016887(molecular_function:ATPase activity); GO:0005871(cellular_component:kinesin complex); GO:0005874(cellular_component:microtubule); GO:0043268(biological_process:positive regulation of potassium ion transport); GO:0032230(biological_process:positive regula…	K10396	KIF5	map04144(Endocytosis); map04728(Dopaminergic synapse)	COG5059(A:RNA processing and modification)	XP_020920464.1(kinesin-1 heavy chain [Sus scrofa])	sp|P33176|KINH_HUMAN(Kinesin-1 heavy chain OS=Homo sapiens OX=9606 GN=KIF5B PE=1 SV=1)	PF00225.23(Kinesin:Kinesin motor domain); PF16796.5(Microtub_bd:Microtubule binding); PF16454.5(PI3K_P85_iSH2:Phosphatidylinositol 3-kinase regulatory subunit P85 inter-SH2 domain)
Pig.21242.1	Pig.21242	SLC2A4-201	solute carrier family 2, facilitated glucose transporter member 4 [Sus scrofa]	5.93	4.03	1.99	1.22	1.67	0.81	60.83	48.18	54.01	GO:0005355(molecular_function:glucose transmembrane transporter activity); GO:0009897(cellular_component:external side of plasma membrane); GO:0045121(cellular_component:membrane raft); GO:0042383(cellular_component:sarcolemma); GO:0070062(cellular_component:extracellular exosome); GO:0030659(cellular_component:cytoplasmic vesicle membrane); GO:0071356(biological_process:cellular response to tumo…	K07191	SLC2A4, GLUT4	map04068(FoxO signaling pathway); map04920(Adipocytokine signaling pathway); map04152(AMPK signaling pathway); map04910(Insulin signaling pathway); map04930(Type II diabetes mellitus); map04931(Insulin resistance)	COG0477(J:Translation, ribosomal structure and biogenesis)	NP_001121905.1(solute carrier family 2, facilitated glucose transporter member 4 [Sus scrofa])	sp|P14672|GLUT4_HUMAN(Solute carrier family 2, facilitated glucose transporter member 4 OS=Homo sapiens OX=9606 GN=SLC2A4 PE=1 SV=1)	PF00083.24(Sugar_tr:Sugar (and other) transporter); PF07690.16(MFS_1:Major Facilitator Superfamily)
Pig.09089.1	Pig.09089	PTCD1	LOW QUALITY PROTEIN: pentatricopeptide repeat-containing protein 1, mitochondrial [Sus scrofa]	4.54	7.71	6.58	3.3	3.14	2.52	7.28	9.56	9.83		K17710	PTCD1		ENOG410Z7Z7(S:Function unknown)	XP_013850852.2(LOW QUALITY PROTEIN: pentatricopeptide repeat-containing protein 1, mitochondrial [Sus scrofa])	sp|Q8C2E4|PTCD1_MOUSE(Pentatricopeptide repeat-containing protein 1, mitochondrial OS=Mus musculus OX=10090 GN=Ptcd1 PE=2 SV=2)	PF13041.6(PPR_2:PPR repeat family); PF13812.6(PPR_3:Pentatricopeptide repeat domain); PF01535.20(PPR:PPR repeat); PF17177.4(PPR_long:Pentacotripeptide-repeat region of PRORP); PF12854.7(PPR_1:PPR repeat)
Pig.12369.1	Pig.12369	CIRBP	NR:NA	24.35	22.72	29.02	25.6	23.55	27.41	158.33	192.21	230.93	GO:0005737(cellular_component:cytoplasm); GO:0070181(molecular_function:small ribosomal subunit rRNA binding); GO:1902806(biological_process:regulation of cell cycle G1/S phase transition); GO:0030308(biological_process:negative regulation of cell growth); GO:0005730(cellular_component:nucleolus); GO:0034063(biological_process:stress granule assembly); GO:0030371(molecular_function:translation re…	K13195	CIRBP		COG0724(S:Function unknown)	XP_005661438.1(cold-inducible RNA-binding protein isoform X3 [Sus scrofa])	sp|Q14011|CIRBP_HUMAN(Cold-inducible RNA-binding protein OS=Homo sapiens OX=9606 GN=CIRBP PE=1 SV=1)	PF00076.22(RRM_1:RNA recognition motif. (a.k.a. RRM, RBD, or RNP domain)); PF16367.5(RRM_7:RNA recognition motif); PF16842.5(RRM_occluded:Occluded RNA-recognition motif)
Pig.01506.1	Pig.01506	CALB1-201	calbindin [Sus scrofa]	0.05	0.05	0.06	0	0	0	0	0	0	GO:0007616(biological_process:long-term memory); GO:0007614(biological_process:short-term memory); GO:0030425(cellular_component:dendrite); GO:0030424(cellular_component:axon); GO:0010842(biological_process:retina layer formation); GO:0008270(molecular_function:zinc ion binding); GO:0072286(biological_process:metanephric connecting tubule development); GO:0098982(cellular_component:GABA-ergic syn…	K14757	CALB1, CALB	map04961(Endocrine and other factor-regulated calcium reabsorption)	COG5126(J:Translation, ribosomal structure and biogenesis)	NP_001123698.1(calbindin [Sus scrofa])	sp|P04467|CALB1_BOVIN(Calbindin OS=Bos taurus OX=9913 GN=CALB1 PE=1 SV=3)	PF00036.32(EF-hand_1:EF hand); PF13405.6(EF-hand_6:EF-hand domain); PF13499.6(EF-hand_7:EF-hand domain pair); PF13202.6(EF-hand_5:EF hand); PF13833.6(EF-hand_8:EF-hand domain pair)
Pig.10934.1	Pig.10934	LOC101142660	T cell receptor delta-chain, partial [Sus scrofa]	0	0.1	0	0	0.12	0	0	0	0					ENOG410YTGF(S:Function unknown)	BAH03507.1(T cell receptor delta-chain, partial [Sus scrofa])	sp|A0A1B0GX56|TRDV1_HUMAN(T cell receptor delta variable 1 OS=Homo sapiens OX=9606 GN=TRDV1 PE=1 SV=1)	PF07686.17(V-set:Immunoglobulin V-set domain); PF13927.6(Ig_3:Immunoglobulin domain); PF00047.25(ig:Immunoglobulin domain); PF07679.16(I-set:Immunoglobulin I-set domain); PF13895.6(Ig_2:Immunoglobulin domain)
Pig.20647.1	Pig.20647	WWOX-201	WW domain-containing oxidoreductase isoform X6 [Sus scrofa]	7.39	7.14	4.43	10.8	11.2	13.79	8.86	11.97	14.69		K19329	WWOX		COG5021(U:Intracellular trafficking, secretion, and vesicular transport)	XP_013853617.1(WW domain-containing oxidoreductase isoform X10 [Sus scrofa])	sp|Q9NZC7|WWOX_HUMAN(WW domain-containing oxidoreductase OS=Homo sapiens OX=9606 GN=WWOX PE=1 SV=1)	PF00397.26(WW:WW domain)
Pig.19223.1	Pig.19223	EHBP1L1-201	EH domain-binding protein 1-like protein 1 isoform X1 [Sus scrofa]	1.68	2.16	2.17	2.06	1.8	2.15	9.17	12.8	11.25					COG5069(S:Function unknown)	XP_020938494.1(EH domain-binding protein 1-like protein 1 isoform X1 [Sus scrofa])	sp|Q99MS7|EH1L1_MOUSE(EH domain-binding protein 1-like protein 1 OS=Mus musculus OX=10090 GN=Ehbp1l1 PE=1 SV=1)	PF12130.8(DUF3585:Bivalent Mical/EHBP Rab binding domain); PF00307.31(CH:Calponin homology (CH) domain); PF10358.9(NT-C2:N-terminal C2 in EEIG1 and EHBP1 proteins); PF11971.8(CAMSAP_CH:CAMSAP CH domain)
Pig.14667.1	Pig.14667	THBS2-202	thrombospondin-2 isoform X1 [Sus scrofa]	4.22	5.66	6.87	1.73	2.11	1.42	82.66	140.26	106.64	GO:0005604(cellular_component:basement membrane); GO:0031091(cellular_component:platelet alpha granule); GO:0062023(cellular_component:collagen-containing extracellular matrix); GO:0005509(molecular_function:calcium ion binding); GO:0007155(biological_process:cell adhesion); GO:0005576(cellular_component:extracellular region); GO:0008201(molecular_function:heparin binding); GO:0016525(biological_…	K04659	THBS2S	map05165(Human papillomavirus infection); map04510(Focal adhesion); map04512(ECM-receptor interaction); map05144(Malaria); map04145(Phagosome); map04151(PI3K-Akt signaling pathway)	ENOG410XQKE(Z:Cytoskeleton)	XP_013847876.1(thrombospondin-2 isoform X1 [Sus scrofa])	sp|Q95116|TSP2_BOVIN(Thrombospondin-2 OS=Bos taurus OX=9913 GN=THBS2 PE=2 SV=2)	PF05735.12(TSP_C:Thrombospondin C-terminal region); PF02412.18(TSP_3:Thrombospondin type 3 repeat); PF00090.19(TSP_1:Thrombospondin type 1 domain); PF00093.18(VWC:von Willebrand factor type C domain); PF12947.7(EGF_3:EGF domain); PF07645.15(EGF_CA:Calcium-binding EGF domain); PF13385.6(Laminin_G_3:Concanavalin A-like lectin/glucanases superfamily)
MSTRG.25240.1	MSTRG.25240			1.91	1.96	1.67	1.76	1.03	1.43	1.61	2.87	2.6	GO:0030234(molecular_function:enzyme regulator activity); GO:0051924(biological_process:regulation of calcium ion transport); GO:0016021(cellular_component:integral component of membrane); GO:0016529(cellular_component:sarcoplasmic reticulum)				ENOG4111C1T(S:Function unknown)	XP_022422055.1(solute carrier family 35 member F2 isoform X3 [Delphinapterus leucas])	sp|P42532|SARCO_RABIT(Sarcolipin OS=Oryctolagus cuniculus OX=9986 GN=SLN PE=1 SV=1)
MSTRG.21838.1	MSTRG.21838			0.15	0.1	0.26	0.52	0.26	0.4	0.62	0.38	0.57						XP_020954391.1(cullin-7 isoform X1 [Sus scrofa] >XP_020954392.1 cullin-7 isoform X1 [Sus scrofa])		PF08333.11(DUF1725:Protein of unknown function (DUF1725))
Pig.16367.1	Pig.16367	FGF8-202	fibroblast growth factor 8 precursor [Bos taurus]	0	0	0	0	0	0	0	0	0	GO:0045840(biological_process:positive regulation of mitotic nuclear division); GO:0021544(biological_process:subpallium development); GO:0042056(molecular_function:chemoattractant activity); GO:0030917(biological_process:midbrain-hindbrain boundary development); GO:0000165(biological_process:MAPK cascade); GO:0060348(biological_process:bone development); GO:0060037(biological_process:pharyngeal …	K04358	FGF	map04810(Regulation of actin cytoskeleton); map05200(Pathways in cancer); map04015(Rap1 signaling pathway); map04014(Ras signaling pathway); map05218(Melanoma); map04010(MAPK signaling pathway); map05224(Breast cancer); map05226(Gastric cancer); map04151(PI3K-Akt signaling pathway)	ENOG4111IPH(S:Function unknown)	NP_001193607.1(fibroblast growth factor 8 precursor [Bos taurus])	sp|P55075|FGF8_HUMAN(Fibroblast growth factor 8 OS=Homo sapiens OX=9606 GN=FGF8 PE=1 SV=1)	PF00167.18(FGF:Fibroblast growth factor)
Pig.07715.1	Pig.07715	KCTD9-201	BTB/POZ domain-containing protein KCTD9 [Sus scrofa]	3.8	3.03	3.46	5.17	4.02	4.34	17.05	20.39	32.34	GO:0043621(molecular_function:protein self-association); GO:0035556(biological_process:intracellular signal transduction); GO:0051260(biological_process:protein homooligomerization); GO:0042802(molecular_function:identical protein binding); GO:0097602(molecular_function:cullin family protein binding)				COG1357(S:Function unknown)	XP_003132863.3(BTB/POZ domain-containing protein KCTD9 [Sus scrofa])	sp|Q7L273|KCTD9_HUMAN(BTB/POZ domain-containing protein KCTD9 OS=Homo sapiens OX=9606 GN=KCTD9 PE=1 SV=1)	PF00805.22(Pentapeptide:Pentapeptide repeats (8 copies)); PF02214.22(BTB_2:BTB/POZ domain); PF13599.6(Pentapeptide_4:Pentapeptide repeats (9 copies)); PF11834.8(KHA:KHA, dimerisation domain of potassium ion channel); PF13576.6(Pentapeptide_3:Pentapeptide repeats (9 copies)); PF00651.31(BTB:BTB/POZ domain); PF16017.5(BTB_3:BTB/POZ domain)
Pig.02852.1	Pig.02852	NR2E3-201	photoreceptor-specific nuclear receptor [Sus scrofa]	0	0	0	0	0	0	0	0	0	GO:0042462(biological_process:eye photoreceptor cell development); GO:0008285(biological_process:negative regulation of cell proliferation); GO:0045872(biological_process:positive regulation of rhodopsin gene expression); GO:0000122(biological_process:negative regulation of transcription from RNA polymerase II promoter); GO:0003700(molecular_function:transcription factor activity, sequence-specif…	K08546	NR2E3, PNR		ENOG410XRZC(O:Posttranslational modification, protein turnover, chaperones)	XP_020940664.1(photoreceptor-specific nuclear receptor [Sus scrofa])	sp|Q9TTF0|NR2E3_BOVIN(Photoreceptor-specific nuclear receptor OS=Bos taurus OX=9913 GN=NR2E3 PE=1 SV=2)	PF00104.30(Hormone_recep:Ligand-binding domain of nuclear hormone receptor); PF00105.18(zf-C4:Zinc finger, C4 type (two domains))
Pig.10225.1	Pig.10225	NARS2	probable asparagine--tRNA ligase, mitochondrial isoform X4 [Sus scrofa]	1.47	0.62	0.74	1.51	0.82	0.79	2.01	1.05	0.86	GO:0004812(molecular_function:aminoacyl-tRNA ligase activity); GO:0006421(biological_process:asparaginyl-tRNA aminoacylation); GO:0004816(molecular_function:asparagine-tRNA ligase activity); GO:0003676(molecular_function:nucleic acid binding); GO:0006418(biological_process:tRNA aminoacylation for protein translation); GO:0005524(molecular_function:ATP binding)	K01893	NARS, asnS	map00970(Aminoacyl-tRNA biosynthesis)	COG0017(J:Translation, ribosomal structure and biogenesis)	XP_003129750.1(probable asparagine--tRNA ligase, mitochondrial isoform X1 [Sus scrofa])	sp|Q96I59|SYNM_HUMAN(Probable asparagine--tRNA ligase, mitochondrial OS=Homo sapiens OX=9606 GN=NARS2 PE=1 SV=3)	PF00152.20(tRNA-synt_2:tRNA synthetases class II (D, K and N))
Pig.22644.1	Pig.22644	ZNF879-203	LOW QUALITY PROTEIN: uncharacterized protein LOC102159167 [Sus scrofa]	0	0	0	0	0	0	0	0	0	GO:0006355(biological_process:regulation of transcription, DNA-templated); GO:0046872(molecular_function:metal ion binding); GO:0003676(molecular_function:nucleic acid binding)	K09228	KRAB		COG5048(S:Function unknown)	XP_020940808.1(LOW QUALITY PROTEIN: uncharacterized protein LOC102159167 [Sus scrofa])	sp|B4DU55|ZN879_HUMAN(Zinc finger protein 879 OS=Homo sapiens OX=9606 GN=ZNF879 PE=2 SV=2)	PF01352.27(KRAB:KRAB box)
Pig.06626.1	Pig.06626	CDH6-201	LOW QUALITY PROTEIN: cadherin-6 [Sus scrofa]	0.09	0.23	0.28	0.06	0.06	0.06	1.17	1.32	0.85	GO:0016021(cellular_component:integral component of membrane); GO:0007219(biological_process:Notch signaling pathway); GO:0016342(cellular_component:catenin complex); GO:0000902(biological_process:cell morphogenesis); GO:0008092(molecular_function:cytoskeletal protein binding); GO:0098609(biological_process:cell-cell adhesion); GO:0034332(biological_process:adherens junction organization); GO:001…	K06798	CDH6		ENOG410XQHI(K:Transcription)	XP_003359784.3(LOW QUALITY PROTEIN: cadherin-6 [Sus scrofa])	sp|Q3SWX5|CADH6_BOVIN(Cadherin-6 OS=Bos taurus OX=9913 GN=CDH6 PE=2 SV=1)	PF00028.17(Cadherin:Cadherin domain); PF01049.17(Cadherin_C:Cadherin cytoplasmic region)
Pig.00344.1	Pig.00344	SLC25A40-202	solute carrier family 25 member 40 [Sus scrofa]	0.86	1.15	1.73	1.85	1.74	1.78	2.94	2.89	3.32	GO:0005743(cellular_component:mitochondrial inner membrane); GO:0022857(molecular_function:transmembrane transporter activity); GO:0016021(cellular_component:integral component of membrane)	K15119	SLC25A39_40		ENOG410XQVP(S:Function unknown)	XP_020958183.1(solute carrier family 25 member 40 [Sus scrofa])	sp|Q0VCH6|S2540_BOVIN(Solute carrier family 25 member 40 OS=Bos taurus OX=9913 GN=SLC25A40 PE=2 SV=1)	PF00153.27(Mito_carr:Mitochondrial carrier protein)
Pig.13768.1	Pig.13768	SLC12A3-201	solute carrier family 12 member 3 isoform X3 [Sus scrofa]	0	0	0	0	0	0	0	0	0	GO:0016021(cellular_component:integral component of membrane); GO:0015377(molecular_function:cation:chloride symporter activity)	K14426	SLC12A3, TSC		COG0531(S:Function unknown)	XP_020949556.1(solute carrier family 12 member 3 isoform X3 [Sus scrofa])	sp|P55017|S12A3_HUMAN(Solute carrier family 12 member 3 OS=Homo sapiens OX=9606 GN=SLC12A3 PE=1 SV=3)	PF00324.21(AA_permease:Amino acid permease); PF03522.15(SLC12:Solute carrier family 12); PF08403.10(AA_permease_N:Amino acid permease N-terminal)
Pig.01574.1	Pig.01574	SLC16A1-201	monocarboxylate transporter 1 isoform X1 [Sus scrofa]	44.51	46.18	40.37	12.46	8.37	12.91	35.66	58.14	32.36	GO:0005887(cellular_component:integral component of plasma membrane); GO:0015129(molecular_function:lactate transmembrane transporter activity)	K08179	SLC16A1		ENOG41116NW(P:Inorganic ion transport and metabolism)	XP_020944109.1(monocarboxylate transporter 1 isoform X1 [Sus scrofa])	sp|Q3MHW6|MOT1_BOVIN(Monocarboxylate transporter 1 OS=Bos taurus OX=9913 GN=SLC16A1 PE=2 SV=2)	PF07690.16(MFS_1:Major Facilitator Superfamily)
Pig.10658.1	Pig.10658	LY9	T-lymphocyte surface antigen Ly-9 isoform X1 [Sus scrofa]	0.19	0.19	0.2	0.06	0.02	0.17	0.16	0.03	0.29					ENOG4111D9A(S:Function unknown)	XP_020945221.1(T-lymphocyte surface antigen Ly-9 isoform X1 [Sus scrofa])	sp|Q9HBG7|LY9_HUMAN(T-lymphocyte surface antigen Ly-9 OS=Homo sapiens OX=9606 GN=LY9 PE=1 SV=3)	PF13927.6(Ig_3:Immunoglobulin domain); PF13895.6(Ig_2:Immunoglobulin domain)
Pig.09095.1	Pig.09095	FAM200A-201	LOW QUALITY PROTEIN: protein FAM200A [Sus scrofa]	0.31	0.25	0.2	0.16	0.16	0.09	0.88	1.06	1.12	GO:0005654(cellular_component:nucleoplasm); GO:0016021(cellular_component:integral component of membrane)				ENOG41115RS(S:Function unknown)	XP_013850843.2(LOW QUALITY PROTEIN: protein FAM200A [Sus scrofa])	sp|Q8TCP9|F200A_HUMAN(Protein FAM200A OS=Homo sapiens OX=9606 GN=FAM200A PE=1 SV=1)
Pig.03447.1	Pig.03447	NEK3-201	serine/threonine-protein kinase Nek3 isoform X8 [Sus scrofa]	0.15	0.15	0.52	0.69	0.62	0.71	1.16	1.72	0.73		K20873	NEK3		ENOG410Y7JF(T:Signal transduction mechanisms)	XP_013835933.2(serine/threonine-protein kinase Nek3 isoform X8 [Sus scrofa])	sp|P51956|NEK3_HUMAN(Serine/threonine-protein kinase Nek3 OS=Homo sapiens OX=9606 GN=NEK3 PE=1 SV=2)	PF00069.25(Pkinase:Protein kinase domain); PF07714.17(Pkinase_Tyr:Protein tyrosine kinase); PF14531.6(Kinase-like:Kinase-like); PF01636.23(APH:Phosphotransferase enzyme family)
Pig.13916.1	Pig.13916	IFN-OMEGA-7-201	inferferon omega 7 precursor [Sus scrofa]	0	0	0	0	0	0	0	0	0	GO:0005126(molecular_function:cytokine receptor binding); GO:0005125(molecular_function:cytokine activity); GO:0033141(biological_process:positive regulation of peptidyl-serine phosphorylation of STAT protein); GO:0051607(biological_process:defense response to virus); GO:0005132(molecular_function:type I interferon receptor binding); GO:0043330(biological_process:response to exogenous dsRNA); GO:…	K05440	IFNW	map04060(Cytokine-cytokine receptor interaction); map04622(RIG-I-like receptor signaling pathway); map04630(Jak-STAT signaling pathway)	ENOG4111675(S:Function unknown)	NP_001123704.1(inferferon omega 7 precursor [Sus scrofa])	sp|O46633|IFNT_CEREL(Interferon tau OS=Cervus elaphus OX=9860 GN=IFNT PE=2 SV=1)	PF00143.19(Interferon:Interferon alpha/beta domain)
MSTRG.25515.1	MSTRG.25515			0.05	0.07	0.02	0.03	0.03	0.04	0.04	0.03	0.08	GO:0016874(molecular_function:ligase activity); GO:0008270(molecular_function:zinc ion binding)	K12033	TRIM68		ENOG41126AZ(O:Posttranslational modification, protein turnover, chaperones); ENOG4111G04(O:Posttranslational modification, protein turnover, chaperones)	XP_003482598.2(LOW QUALITY PROTEIN: E3 ubiquitin-protein ligase TRIM68 [Sus scrofa])	sp|Q6AZZ1|TRI68_HUMAN(E3 ubiquitin-protein ligase TRIM68 OS=Homo sapiens OX=9606 GN=TRIM68 PE=1 SV=1)	PF13765.6(PRY:SPRY-associated domain); PF00622.28(SPRY:SPRY domain); PF15227.6(zf-C3HC4_4:zinc finger of C3HC4-type, RING); PF00097.25(zf-C3HC4:Zinc finger, C3HC4 type (RING finger)); PF13920.6(zf-C3HC4_3:Zinc finger, C3HC4 type (RING finger)); PF13445.6(zf-RING_UBOX:RING-type zinc-finger); PF00643.24(zf-B_box:B-box zinc finger); PF13923.6(zf-C3HC4_2:Zinc finger, C3HC4 type (RING finger)); PF1363…
Pig.03546.1	Pig.03546	CRYL1-202	L-gulonate 3-dehydrogenase [Sus scrofa]	8.8	11.5	7.12	6.28	4.84	8.03	16.39	16.25	13.59	GO:0006631(biological_process:fatty acid metabolic process); GO:0003857(molecular_function:3-hydroxyacyl-CoA dehydrogenase activity); GO:0005829(cellular_component:cytosol); GO:0070403(molecular_function:NAD+ binding); GO:0050104(molecular_function:L-gulonate 3-dehydrogenase activity)	K13247	CRYL1	map00040(Pentose and glucuronate interconversions)	COG1250(U:Intracellular trafficking, secretion, and vesicular transport)	ADB57036.1(L-gulonate 3-dehydrogenase [Sus scrofa])	sp|Q8SQ26|CRYL1_PIG(Lambda-crystallin homolog OS=Sus scrofa OX=9823 GN=CRYL1 PE=2 SV=3)	PF02737.18(3HCDH_N:3-hydroxyacyl-CoA dehydrogenase, NAD binding domain); PF00725.22(3HCDH:3-hydroxyacyl-CoA dehydrogenase, C-terminal domain)
Pig.09507.1	Pig.09507	RPSA-202	LOW QUALITY PROTEIN: 40S ribosomal protein SA-like [Sus scrofa]	0	0	0	0	0	0	0	0	0	GO:0000028(biological_process:ribosomal small subunit assembly); GO:0043236(molecular_function:laminin binding); GO:0022627(cellular_component:cytosolic small ribosomal subunit); GO:0005634(cellular_component:nucleus); GO:0005055(molecular_function:laminin receptor activity); GO:0003735(molecular_function:structural constituent of ribosome); GO:0005886(cellular_component:plasma membrane); GO:0006…	K02998	RP-SAe, RPSA	map03010(Ribosome)	COG0052(S:Function unknown)	XP_020933343.1(LOW QUALITY PROTEIN: 40S ribosomal protein SA-like [Sus scrofa])	sp|Q2L9X0|RSSA_CHLAE(40S ribosomal protein SA OS=Chlorocebus aethiops OX=9534 GN=RPSA PE=2 SV=3)	PF00318.20(Ribosomal_S2:Ribosomal protein S2); PF16122.5(40S_SA_C:40S ribosomal protein SA C-terminus)
Pig.08149.1	Pig.08149	MTMR2-201	myotubularin-related protein 2 isoform X1 [Sus scrofa]	3.33	3.2	4.08	2.28	1.25	2.15	14.16	18.3	16.98	GO:0048666(biological_process:neuron development); GO:0005634(cellular_component:nucleus); GO:0005774(cellular_component:vacuolar membrane); GO:0004725(molecular_function:protein tyrosine phosphatase activity); GO:0052629(molecular_function:phosphatidylinositol-3,5-bisphosphate 3-phosphatase activity); GO:0032288(biological_process:myelin assembly); GO:0031642(biological_process:negative regulati…	K18081	MTMR1_2	map04070(Phosphatidylinositol signaling system); map00562(Inositol phosphate metabolism)	ENOG410XPTU(Z:Cytoskeleton)	XP_003129845.1(myotubularin-related protein 2 isoform X1 [Sus scrofa])	sp|A6QLT2|MTMR2_BOVIN(Myotubularin-related protein 2 OS=Bos taurus OX=9913 GN=MTMR2 PE=2 SV=1)	PF06602.14(Myotub-related:Myotubularin-like phosphatase domain); PF02893.20(GRAM:GRAM domain); PF00102.27(Y_phosphatase:Protein-tyrosine phosphatase)
Pig.17910.1	Pig.17910	KDM7A-201	lysine-specific demethylase 7A [Sus scrofa]	5.89	4.7	6.41	3.59	2.24	3.48	9.43	9.61	7.67	GO:0035064(molecular_function:methylated histone binding); GO:0005730(cellular_component:nucleolus); GO:0005634(cellular_component:nucleus); GO:0005654(cellular_component:nucleoplasm); GO:0051864(molecular_function:histone demethylase activity (H3-K36 specific)); GO:0032454(molecular_function:histone demethylase activity (H3-K9 specific)); GO:0008270(molecular_function:zinc ion binding); GO:00458…	K11445	KDM7A, JHDM1D		ENOG410XQXU(S:Function unknown)	XP_003134662.1(lysine-specific demethylase 7A [Sus scrofa])	sp|Q6ZMT4|KDM7A_HUMAN(Lysine-specific demethylase 7A OS=Homo sapiens OX=9606 GN=KDM7A PE=1 SV=2)	PF17811.1(JHD:Jumonji helical domain); PF02373.22(JmjC:JmjC domain, hydroxylase); PF00628.29(PHD:PHD-finger); PF13621.6(Cupin_8:Cupin-like domain)
Pig.07709.1	Pig.07709	PPP1R1A-202	protein phosphatase 1 regulatory subunit 1A [Sus scrofa]	17.39	15.48	28.48	13.38	18.1	11.64	65.79	132.3	68.84	GO:0004864(molecular_function:protein phosphatase inhibitor activity); GO:0007165(biological_process:signal transduction)	K08050	PPP1R1A	map04261(Adrenergic signaling in cardiomyocytes); map04720(Long-term potentiation)	ENOG41125ZM(T:Signal transduction mechanisms)	XP_020947410.1(protein phosphatase 1 regulatory subunit 1A [Sus scrofa])	sp|P19103|PPR1A_RAT(Protein phosphatase 1 regulatory subunit 1A OS=Rattus norvegicus OX=10116 GN=Ppp1r1a PE=1 SV=1)	PF05395.12(DARPP-32:Protein phosphatase inhibitor 1/DARPP-32)
Pig.23012.1	Pig.23012	KIF1A-202	kinesin family member 1A isoform D [Homo sapiens]	2.76	0	0.66	0.42	0.75	0.43	0.65	0	0.66	GO:0008021(cellular_component:synaptic vesicle); GO:0030425(cellular_component:dendrite); GO:0030424(cellular_component:axon); GO:0016887(molecular_function:ATPase activity); GO:0005871(cellular_component:kinesin complex); GO:0030705(biological_process:cytoskeleton-dependent intracellular transport); GO:0005874(cellular_component:microtubule); GO:1904115(cellular_component:axon cytoplasm); GO:000…	K10392	KIF1		COG5059(K:Transcription)	EAW71216.1(kinesin family member 1A, isoform CRA_c [Homo sapiens])	sp|Q12756|KIF1A_HUMAN(Kinesin-like protein KIF1A OS=Homo sapiens OX=9606 GN=KIF1A PE=1 SV=2)
Pig.08048.1	Pig.08048	PRKCA-201	PREDICTED: protein kinase C alpha type isoform X1 [Vicugna pacos]	3.29	3.72	4.07	2.79	2.09	2.48	6.29	7.9	9.17	GO:0045931(biological_process:positive regulation of mitotic cell cycle); GO:0001938(biological_process:positive regulation of endothelial cell proliferation); GO:0005783(cellular_component:endoplasmic reticulum); GO:0045785(biological_process:positive regulation of cell adhesion); GO:0031666(biological_process:positive regulation of lipopolysaccharide-mediated signaling pathway); GO:0070555(biol…	K02677	PRKCA	map05214(Glioma); map05164(Influenza A); map04650(Natural killer cell mediated cytotoxicity); map05163(Human cytomegalovirus infection); map04750(Inflammatory mediator regulation of TRP channels); map05161(Hepatitis B); map04015(Rap1 signaling pathway); map04014(Ras signaling pathway); map04540(Gap junction); map04010(MAPK signaling pathway); map04012(ErbB signaling pathway); map04360(Axon guidan…	ENOG410XNPH(U:Intracellular trafficking, secretion, and vesicular transport)	XP_025292274.1(protein kinase C alpha type [Canis lupus dingo])	sp|P05696|KPCA_RAT(Protein kinase C alpha type OS=Rattus norvegicus OX=10116 GN=Prkca PE=1 SV=3)	PF00069.25(Pkinase:Protein kinase domain); PF07714.17(Pkinase_Tyr:Protein tyrosine kinase); PF00130.22(C1_1:Phorbol esters/diacylglycerol binding domain (C1 domain)); PF00168.30(C2:C2 domain); PF00433.24(Pkinase_C:Protein kinase C terminal domain)
Pig.22635.1	Pig.22635	PPP2R2C-201	protein phosphatase 2, regulatory subunit B, gamma isoform X4 [Sus scrofa]	0	0.11	0.06	0	0.2	0	0.32	0.34	0.34	GO:0019888(molecular_function:protein phosphatase regulator activity); GO:0005829(cellular_component:cytosol); GO:0000278(biological_process:mitotic cell cycle); GO:0000159(cellular_component:protein phosphatase type 2A complex); GO:0070262(biological_process:peptidyl-serine dephosphorylation)	K04354	PPP2R2	map05142(Chagas disease (American trypanosomiasis)); map05165(Human papillomavirus infection); map05160(Hepatitis C); map04390(Hippo signaling pathway); map04391(Hippo signaling pathway - fly); map04261(Adrenergic signaling in cardiomyocytes); map04151(PI3K-Akt signaling pathway); map03015(mRNA surveillance pathway); map04728(Dopaminergic synapse); map04530(Tight junction); map04071(Sphingolipid …	COG5170(T:Signal transduction mechanisms)	NP_001193925.1(protein phosphatase 2, regulatory subunit B, gamma isoform d [Homo sapiens])	sp|Q9Y2T4|2ABG_HUMAN(Serine/threonine-protein phosphatase 2A 55 kDa regulatory subunit B gamma isoform OS=Homo sapiens OX=9606 GN=PPP2R2C PE=1 SV=4)
Pig.10231.1	Pig.10231	THRSP-202	thyroid hormone-inducible hepatic protein [Sus scrofa]	0	0	6.29	0	0	0	209.1	447.1	317.53	GO:0005654(cellular_component:nucleoplasm); GO:0009617(biological_process:response to bacterium); GO:0005829(cellular_component:cytosol); GO:0010866(biological_process:regulation of triglyceride biosynthetic process); GO:0042803(molecular_function:protein homodimerization activity)				ENOG410YT7Q(K:Transcription)	NP_001231305.1(thyroid hormone-inducible hepatic protein [Sus scrofa])	sp|Q92748|THRSP_HUMAN(Thyroid hormone-inducible hepatic protein OS=Homo sapiens OX=9606 GN=THRSP PE=1 SV=1)	PF07084.12(Spot_14:Thyroid hormone-inducible hepatic protein Spot 14)
Pig.05295.1	Pig.05295	ZRANB2-201	Zinc finger Ran-binding domain-containing protein 2 [Pteropus alecto]	40.69	37.86	36.69	14.91	9.17	14.79	11.36	14.97	18.42	GO:0003700(molecular_function:transcription factor activity, sequence-specific DNA binding); GO:0005634(cellular_component:nucleus); GO:0001530(molecular_function:lipopolysaccharide binding); GO:0005654(cellular_component:nucleoplasm); GO:0003723(molecular_function:RNA binding); GO:0046872(molecular_function:metal ion binding); GO:0008380(biological_process:RNA splicing); GO:0006397(biological_pr…				ENOG4111QXA(S:Function unknown)	NP_976225.1(zinc finger Ran-binding domain-containing protein 2 isoform 1 [Homo sapiens])	sp|O95218|ZRAB2_HUMAN(Zinc finger Ran-binding domain-containing protein 2 OS=Homo sapiens OX=9606 GN=ZRANB2 PE=1 SV=2)	PF00641.18(zf-RanBP:Zn-finger in Ran binding protein and others)
Pig.09803.1	Pig.09803	BMP15-201	bone morphogenetic protein 15 [Sus scrofa]	0	0	0	0	0	0	0	0	0	GO:0005737(cellular_component:cytoplasm); GO:0060016(biological_process:granulosa cell development); GO:0005125(molecular_function:cytokine activity); GO:0001541(biological_process:ovarian follicle development); GO:0005615(cellular_component:extracellular space); GO:0005160(molecular_function:transforming growth factor beta receptor binding); GO:0048468(biological_process:cell development); GO:00…	K05498	BMP15, GDF9B	map04060(Cytokine-cytokine receptor interaction); map04913(Ovarian steroidogenesis)	ENOG410XT8Z(U:Intracellular trafficking, secretion, and vesicular transport)	NP_001005155.2(bone morphogenetic protein 15 [Sus scrofa])	sp|Q6PX77|BMP15_BOVIN(Bone morphogenetic protein 15 OS=Bos taurus OX=9913 GN=BMP15 PE=2 SV=1)	PF00019.20(TGF_beta:Transforming growth factor beta like domain)
Pig.08839.1	Pig.08839	ZSCAN29-202	LOW QUALITY PROTEIN: zinc finger and SCAN domain-containing protein 32-like [Phascolarctos cinereus]	0	0.34	0	0.66	0.39	0	0.98	0	0.68	GO:0003700(molecular_function:transcription factor activity, sequence-specific DNA binding); GO:0005634(cellular_component:nucleus); GO:0046872(molecular_function:metal ion binding); GO:0003677(molecular_function:DNA binding)	K09230	SCAN		COG5048(Z:Cytoskeleton)	XP_022419694.1(zinc finger and SCAN domain-containing protein 20-like isoform X1 [Delphinapterus leucas])	sp|P17040|ZSC20_HUMAN(Zinc finger and SCAN domain-containing protein 20 OS=Homo sapiens OX=9606 GN=ZSCAN20 PE=1 SV=3)
Pig.03457.1	Pig.03457	COG6-202	conserved oligomeric Golgi complex subunit 6 isoform X1 [Sus scrofa]	4.54	4.29	5.52	4.08	3.2	3.03	6.22	5.51	6.41	GO:0015031(biological_process:protein transport); GO:0006891(biological_process:intra-Golgi vesicle-mediated transport); GO:0017119(cellular_component:Golgi transport complex); GO:0000139(cellular_component:Golgi membrane)	K20293	COG6, COD2		ENOG410Y72M(U:Intracellular trafficking, secretion, and vesicular transport)	XP_020920926.1(conserved oligomeric Golgi complex subunit 6 isoform X1 [Sus scrofa])	sp|Q68FP9|COG6_RAT(Conserved oligomeric Golgi complex subunit 6 OS=Rattus norvegicus OX=10116 GN=Cog6 PE=2 SV=1)	PF06419.11(COG6:Conserved oligomeric complex COG6)
Pig.07973.1	Pig.07973	TMEM94-201	transmembrane protein 94 isoform X6 [Sus scrofa]	6.07	7.59	8.32	2.73	3.11	3.07	8.8	10.47	8.93					ENOG410XQVD(S:Function unknown)	XP_020922294.1(transmembrane protein 94 isoform X6 [Sus scrofa])	sp|Q12767|TMM94_HUMAN(Transmembrane protein 94 OS=Homo sapiens OX=9606 GN=TMEM94 PE=1 SV=1)	PF00689.21(Cation_ATPase_C:Cation transporting ATPase, C-terminus)
Pig.02664.1	Pig.02664	KCNU1-201	potassium channel subfamily U member 1 isoform X4 [Odocoileus virginianus texanus]	0	0	0	0	0	0	0	0	0	GO:0006813(biological_process:potassium ion transport); GO:0005216(molecular_function:ion channel activity); GO:0016021(cellular_component:integral component of membrane)	K05274	KCNMA3, KCNU1, KCA5.1	map04911(Insulin secretion); map04270(Vascular smooth muscle contraction); map04022(cGMP-PKG signaling pathway)	ENOG410YUX1(S:Function unknown)	XP_020931066.1(LOW QUALITY PROTEIN: potassium channel subfamily U member 1 [Sus scrofa])	sp|A8MYU2|KCNU1_HUMAN(Potassium channel subfamily U member 1 OS=Homo sapiens OX=9606 GN=KCNU1 PE=1 SV=2)	PF00520.31(Ion_trans:Ion transport protein); PF07885.16(Ion_trans_2:Ion channel); PF03493.18(BK_channel_a:Calcium-activated BK potassium channel alpha subunit)
Pig.03578.1	Pig.03578	TMED3-201	transmembrane emp24 domain-containing protein 3 precursor [Sus scrofa]	1.65	1.39	3.08	1.04	1.55	0.8	20.23	23.97	13.35	GO:0005794(cellular_component:Golgi apparatus); GO:0007030(biological_process:Golgi organization); GO:0006888(biological_process:ER to Golgi vesicle-mediated transport); GO:0005783(cellular_component:endoplasmic reticulum); GO:0005793(cellular_component:endoplasmic reticulum-Golgi intermediate compartment); GO:0016021(cellular_component:integral component of membrane); GO:0030134(cellular_compone…	K20350	TMED3		ENOG4111JPD(U:Intracellular trafficking, secretion, and vesicular transport)	NP_001191292.1(transmembrane emp24 domain-containing protein 3 precursor [Sus scrofa])	sp|Q9Y3Q3|TMED3_HUMAN(Transmembrane emp24 domain-containing protein 3 OS=Homo sapiens OX=9606 GN=TMED3 PE=1 SV=1)	PF01105.24(EMP24_GP25L:emp24/gp25L/p24 family/GOLD)
Pig.02318.1	Pig.02318	SECISBP2L-201	selenocysteine insertion sequence-binding protein 2-like [Sus scrofa]	29.85	23.67	24.26	7.11	5.54	9.76	13.77	18.22	20.44	GO:0043021(molecular_function:ribonucleoprotein complex binding); GO:0001514(biological_process:selenocysteine incorporation); GO:1990904(cellular_component:ribonucleoprotein complex); GO:0003730(molecular_function:mRNA 3'-UTR binding); GO:0035368(molecular_function:selenocysteine insertion sequence binding)				ENOG410Z16U(S:Function unknown)	NP_001193270.1(selenocysteine insertion sequence-binding protein 2-like [Sus scrofa])	sp|Q93073|SBP2L_HUMAN(Selenocysteine insertion sequence-binding protein 2-like OS=Homo sapiens OX=9606 GN=SECISBP2L PE=1 SV=3)	PF01248.26(Ribosomal_L7Ae:Ribosomal protein L7Ae/L30e/S12e/Gadd45 family)
Pig.05289.1	Pig.05289	LRRC7-201	LOW QUALITY PROTEIN: leucine-rich repeat-containing protein 7 [Sus scrofa]	0	0.01	0	0	0	0.01	0.08	0.09	0.28					COG4886(S:Function unknown)	XP_020952143.1(LOW QUALITY PROTEIN: leucine-rich repeat-containing protein 7 [Sus scrofa])	sp|Q96NW7|LRRC7_HUMAN(Leucine-rich repeat-containing protein 7 OS=Homo sapiens OX=9606 GN=LRRC7 PE=1 SV=1)	PF13855.6(LRR_8:Leucine rich repeat); PF12799.7(LRR_4:Leucine Rich repeats (2 copies)); PF00595.24(PDZ:PDZ domain); PF13180.6(PDZ_2:PDZ domain); PF17820.1(PDZ_6:PDZ domain); PF13306.6(LRR_5:BspA type Leucine rich repeat region (6 copies))
Pig.04078.1	Pig.04078	USP44-201	ubiquitin carboxyl-terminal hydrolase 44 isoform X1 [Sus scrofa]	0.05	0.02	0.1	0.05	0.02	0.05	0.05	0.04	0.03	GO:0005737(cellular_component:cytoplasm); GO:0043161(biological_process:proteasome-mediated ubiquitin-dependent protein catabolic process); GO:0005634(cellular_component:nucleus); GO:0090266(biological_process:regulation of mitotic cell cycle spindle assembly checkpoint); GO:0036459(molecular_function:thiol-dependent ubiquitinyl hydrolase activity); GO:0006511(biological_process:ubiquitin-depende…	K11834	USP44_49		ENOG410XQQ0(K:Transcription)	XP_005664302.1(ubiquitin carboxyl-terminal hydrolase 44 isoform X1 [Sus scrofa])	sp|D2HBJ8|UBP44_AILME(Ubiquitin carboxyl-terminal hydrolase 44 OS=Ailuropoda melanoleuca OX=9646 GN=USP44 PE=3 SV=1)	PF00443.29(UCH:Ubiquitin carboxyl-terminal hydrolase); PF02148.19(zf-UBP:Zn-finger in ubiquitin-hydrolases and other protein); PF13423.6(UCH_1:Ubiquitin carboxyl-terminal hydrolase)
Pig.01884.1	Pig.01884	SCD-201	acyl-CoA desaturase [Sus scrofa]	211.64	213.52	205.86	153.43	172.55	81.08	7843.22	10817	4876.47	GO:0006633(biological_process:fatty acid biosynthetic process); GO:0006636(biological_process:unsaturated fatty acid biosynthetic process); GO:0005730(cellular_component:nucleolus); GO:0016021(cellular_component:integral component of membrane); GO:0005789(cellular_component:endoplasmic reticulum membrane); GO:0030176(cellular_component:integral component of endoplasmic reticulum membrane); GO:190…	K00507	SCD, desC	map04212(Longevity regulating pathway - worm); map03320(PPAR signaling pathway); map01040(Biosynthesis of unsaturated fatty acids); map04152(AMPK signaling pathway)	COG1398(J:Translation, ribosomal structure and biogenesis)	NP_998946.1(acyl-CoA desaturase [Sus scrofa])	sp|O02858|ACOD_PIG(Acyl-CoA desaturase (Fragment) OS=Sus scrofa OX=9823 GN=SCD PE=2 SV=1)	PF00487.24(FA_desaturase:Fatty acid desaturase)
Pig.17966.1	Pig.17966	HMGB3	high mobility group protein B3 isoform X1 [Odocoileus virginianus texanus]	6.34	10.1	5.58	5.13	4.43	3.21	12.04	23.33	11.57	GO:0032392(biological_process:DNA geometric change); GO:0005634(cellular_component:nucleus); GO:0008301(molecular_function:DNA binding, bending); GO:0000400(molecular_function:four-way junction DNA binding); GO:0003677(molecular_function:DNA binding)	K11296	HMGB3		COG5648(B:Chromatin structure and dynamics)	XP_005658000.1(high mobility group protein B3 isoform X2 [Sus scrofa])	sp|O15347|HMGB3_HUMAN(High mobility group protein B3 OS=Homo sapiens OX=9606 GN=HMGB3 PE=1 SV=4)	PF09011.10(HMG_box_2:HMG-box domain); PF00505.19(HMG_box:HMG (high mobility group) box); PF14887.6(HMG_box_5:HMG (high mobility group) box 5)
Pig.04359.1	Pig.04359	HEATR4-201	HEAT repeat-containing protein 4 [Sus scrofa]	0	0	0	0	0	0	0	0	0.01					ENOG410YWTX(U:Intracellular trafficking, secretion, and vesicular transport)	XP_020955152.1(HEAT repeat-containing protein 4 [Sus scrofa])	sp|Q86WZ0|HEAT4_HUMAN(HEAT repeat-containing protein 4 OS=Homo sapiens OX=9606 GN=HEATR4 PE=2 SV=2)	PF13646.6(HEAT_2:HEAT repeats); PF02985.22(HEAT:HEAT repeat)
Pig.00711.1	Pig.00711	LGSN-201	lengsin [Sus scrofa]	0	0	0	0	0	0	0	0	0	GO:0004356(molecular_function:glutamate-ammonia ligase activity); GO:0006542(biological_process:glutamine biosynthetic process)				COG0174(S:Function unknown)	XP_020940314.1(lengsin [Sus scrofa])	sp|Q1ZZS1|LGSN_CANLF(Lengsin OS=Canis lupus familiaris OX=9615 GN=LGSN PE=2 SV=1)	PF00120.24(Gln-synt_C:Glutamine synthetase, catalytic domain); PF03951.19(Gln-synt_N:Glutamine synthetase, beta-Grasp domain); PF16952.5(Gln-synt_N_2:Glutamine synthetase N-terminal domain)
Pig.01015.1	Pig.01015	NUDT6-202	nucleoside diphosphate-linked moiety X motif 6 isoform X3 [Sus scrofa]	2.68	2.26	2.01	1.83	1.22	2.33	1.77	1.35	2.74	GO:0005737(cellular_component:cytoplasm); GO:0016787(molecular_function:hydrolase activity); GO:0045786(biological_process:negative regulation of cell cycle); GO:0008285(biological_process:negative regulation of cell proliferation)				ENOG410Z4GH(S:Function unknown)	XP_003129258.1(nucleoside diphosphate-linked moiety X motif 6 isoform X3 [Sus scrofa])	sp|P53370|NUDT6_HUMAN(Nucleoside diphosphate-linked moiety X motif 6 OS=Homo sapiens OX=9606 GN=NUDT6 PE=1 SV=2)	PF00293.28(NUDIX:NUDIX domain); PF18290.1(Nudix_hydro:Nudix hydrolase domain)
Pig.11639.1	Pig.11639	SMG1-201	serine/threonine-protein kinase SMG1 isoform X1 [Sus scrofa]	9.58	10	13.63	6.24	4.61	6.97	9.31	11.76	14.4	GO:0005737(cellular_component:cytoplasm); GO:0000184(biological_process:nuclear-transcribed mRNA catabolic process, nonsense-mediated decay); GO:0042162(molecular_function:telomeric DNA binding); GO:0005634(cellular_component:nucleus); GO:0032204(biological_process:regulation of telomere maintenance); GO:0005654(cellular_component:nucleoplasm); GO:0004674(molecular_function:protein serine/threoni…	K08873	SMG1	map03015(mRNA surveillance pathway)	COG5032(J:Translation, ribosomal structure and biogenesis)	XP_020942206.1(serine/threonine-protein kinase SMG1 isoform X1 [Sus scrofa])	sp|Q96Q15|SMG1_HUMAN(Serine/threonine-protein kinase SMG1 OS=Homo sapiens OX=9606 GN=SMG1 PE=1 SV=3)	PF15785.5(SMG1:Serine/threonine-protein kinase smg-1); PF00454.27(PI3_PI4_kinase:Phosphatidylinositol 3- and 4-kinase); PF17229.2(SMG1_N:Serine/threonine-protein kinase SMG1 N-terminal); PF02260.20(FATC:FATC domain)
Pig.17107.1	Pig.17107	Mrpl21	NR:NA	4.28	2.43	3.26	2.87	3.77	3.32	4.61	4.35	4.62	GO:0003735(molecular_function:structural constituent of ribosome); GO:0005840(cellular_component:ribosome); GO:0003723(molecular_function:RNA binding); GO:0006412(biological_process:translation)	K02888	RP-L21, MRPL21, rplU	map03010(Ribosome)	ENOG4111TX4(J:Translation, ribosomal structure and biogenesis)	XP_027973819.1(39S ribosomal protein L21, mitochondrial isoform X1 [Eumetopias jubatus])	sp|Q2TBS2|RM21_BOVIN(39S ribosomal protein L21, mitochondrial OS=Bos taurus OX=9913 GN=MRPL21 PE=1 SV=1)	PF00829.21(Ribosomal_L21p:Ribosomal prokaryotic L21 protein)
Pig.21613.1	Pig.21613	TCIM-201	protein C8orf4 homolog [Sus scrofa]	68.58	64.23	44.36	14.12	7.79	15.9	188.15	226.01	126.65	GO:0016607(cellular_component:nuclear speck); GO:1902806(biological_process:regulation of cell cycle G1/S phase transition); GO:0005829(cellular_component:cytosol); GO:0005730(cellular_component:nucleolus); GO:1903706(biological_process:regulation of hemopoiesis); GO:0034605(biological_process:cellular response to heat); GO:0006915(biological_process:apoptotic process); GO:0002264(biological_proc…				ENOG410YPN0(S:Function unknown)	XP_003360600.1(protein C8orf4 homolog [Sus scrofa])	sp|Q5E969|TCIM_BOVIN(Transcriptional and immune response regulator OS=Bos taurus OX=9913 GN=TCIM PE=3 SV=1)	PF15063.6(TC1:Thyroid cancer protein 1)
Pig.09087.1	Pig.09087	BUD31-201	Protein BUD31 like protein [Myotis brandtii]	28.27	26.7	29.41	17.46	15.4	15.67	23.71	35.35	27.66	GO:0005634(cellular_component:nucleus); GO:0035257(molecular_function:nuclear hormone receptor binding); GO:0071007(cellular_component:U2-type catalytic step 2 spliceosome); GO:0000398(biological_process:mRNA splicing, via spliceosome); GO:0030374(molecular_function:ligand-dependent nuclear receptor transcription coactivator activity); GO:0005654(cellular_component:nucleoplasm); GO:0000790(cellul…	K12873	BUD31, G10	map03040(Spliceosome)	COG5132(D:Cell cycle control, cell division, chromosome partitioning); COG5132(K:Transcription)	NP_003901.2(protein BUD31 homolog [Homo sapiens])	sp|Q2NKU3|BUD31_BOVIN(Protein BUD31 homolog OS=Bos taurus OX=9913 GN=BUD31 PE=2 SV=1)	PF01125.17(G10:G10 protein)
Pig.01009.1	Pig.01009	Ttyh3	cullin-7 isoform X1 [Sus scrofa]	5.89	18.84	16.35	31.29	43.85	27.09	26.94	39.72	44.44						XP_020954391.1(cullin-7 isoform X1 [Sus scrofa])
Pig.19610.1	Pig.19610	ZNF574	LOW QUALITY PROTEIN: zinc finger protein 574 [Sus scrofa]	3.09	4.32	3.69	1.81	1.59	1.82	6.37	7.64	5.74	GO:0005634(cellular_component:nucleus); GO:0003676(molecular_function:nucleic acid binding)				COG5048(U:Intracellular trafficking, secretion, and vesicular transport)	XP_020950099.1(LOW QUALITY PROTEIN: zinc finger protein 574 [Sus scrofa])	sp|Q5R4P8|ZN574_PONAB(Zinc finger protein 574 OS=Pongo abelii OX=9601 GN=ZNF574 PE=2 SV=1)	PF00096.26(zf-C2H2:Zinc finger, C2H2 type); PF13465.6(zf-H2C2_2:Zinc-finger double domain); PF13894.6(zf-C2H2_4:C2H2-type zinc finger); PF12171.8(zf-C2H2_jaz:Zinc-finger double-stranded RNA-binding); PF13912.6(zf-C2H2_6:C2H2-type zinc finger); PF12874.7(zf-met:Zinc-finger of C2H2 type); PF16622.5(zf-C2H2_11:zinc-finger C2H2-type)
MSTRG.2729.1	MSTRG.2729			0.08	0.07	0.04	0.06	0.03	0.03	0.05	0.08	0.07	GO:0015018(molecular_function:galactosylgalactosylxylosylprotein 3-beta-glucuronosyltransferase activity); GO:0006486(biological_process:protein glycosylation); GO:0050650(biological_process:chondroitin sulfate proteoglycan biosynthetic process); GO:0000139(cellular_component:Golgi membrane); GO:0046872(molecular_function:metal ion binding); GO:0016021(cellular_component:integral component of mem…	K12486;K10157	SMAP;B3GAT2	map04144(Endocytosis); map00515(Mannose type O-glycan biosynthesis)	COG5347(U:Intracellular trafficking, secretion, and vesicular transport); ENOG410XP79(S:Function unknown)	XP_020945121.1(stromal membrane-associated protein 1 isoform X4 [Sus scrofa])	sp|Q91VZ6|SMAP1_MOUSE(Stromal membrane-associated protein 1 OS=Mus musculus OX=10090 GN=Smap1 PE=1 SV=1)	PF01412.18(ArfGap:Putative GTPase activating protein for Arf); PF03360.16(Glyco_transf_43:Glycosyltransferase family 43)
Pig.02612.1	Pig.02612	SCGB3A1-201	secretoglobin family 3A member 1 isoform X1 [Sus scrofa]	0	0	0	0	0	0	0	0.2	0	GO:1901741(biological_process:positive regulation of myoblast fusion); GO:0005615(cellular_component:extracellular space)				ENOG4111BGJ(U:Intracellular trafficking, secretion, and vesicular transport)	XP_003123674.1(secretoglobin family 3A member 1 isoform X1 [Sus scrofa])	sp|Q920D7|SG3A1_MOUSE(Secretoglobin family 3A member 1 OS=Mus musculus OX=10090 GN=Scgb3a1 PE=2 SV=1)
Pig.21674.1	Pig.21674	MXD4-201	max dimerization protein 4 [Sus scrofa]	2.45	2.84	4.69	2.23	2.96	2.32	16.04	21.51	16.12	GO:0003700(molecular_function:transcription factor activity, sequence-specific DNA binding); GO:0046983(molecular_function:protein dimerization activity); GO:0005634(cellular_component:nucleus)	K09114	MXD, MAD		ENOG4111V1C(K:Transcription)	XP_003482378.1(max dimerization protein 4 [Sus scrofa])	sp|Q60948|MAD4_MOUSE(Max dimerization protein 4 OS=Mus musculus OX=10090 GN=Mxd4 PE=1 SV=1)	PF00010.26(HLH:Helix-loop-helix DNA-binding domain)
Pig.16763.1	Pig.16763	GGA2-202	ADP-ribosylation factor-binding protein GGA2 isoform X1 [Sus scrofa]	7.19	10.16	11.38	7.18	6.74	6.27	25.4	29.62	29.84	GO:0006886(biological_process:intracellular protein transport); GO:0016192(biological_process:vesicle-mediated transport); GO:0005623(cellular_component:cell)	K12404	GGA	map04142(Lysosome)	ENOG410Y26G(U:Intracellular trafficking, secretion, and vesicular transport)	XP_005656826.1(ADP-ribosylation factor-binding protein GGA2 isoform X1 [Sus scrofa])	sp|Q9UJY4|GGA2_HUMAN(ADP-ribosylation factor-binding protein GGA2 OS=Homo sapiens OX=9606 GN=GGA2 PE=1 SV=3)	PF00790.19(VHS:VHS domain); PF02883.20(Alpha_adaptinC2:Adaptin C-terminal domain); PF03127.14(GAT:GAT domain); PF18308.1(GGA_N-GAT:GGA N-GAT domain)
Pig.09940.1	Pig.09940	GOLM1-201	Golgi membrane protein 1 isoform X1 [Sus scrofa]	3.09	3.32	4.96	3.51	2.32	5.73	21.08	29.08	20.91	GO:0006997(biological_process:nucleus organization); GO:0005794(cellular_component:Golgi apparatus); GO:0019216(biological_process:regulation of lipid metabolic process)				ENOG4111ZGQ(U:Intracellular trafficking, secretion, and vesicular transport)	XP_020920293.1(Golgi membrane protein 1 isoform X1 [Sus scrofa])	sp|Q8NBJ4|GOLM1_HUMAN(Golgi membrane protein 1 OS=Homo sapiens OX=9606 GN=GOLM1 PE=1 SV=1)
Pig.01496.1	Pig.01496	RMDN1-204	regulator of microtubule dynamics protein 1 isoform X5 [Sus scrofa]	6.21	4.68	7.47	5.01	3.59	3.7	4.19	5.05	3.61					ENOG410ZMYH(S:Function unknown)	XP_013852091.1(regulator of microtubule dynamics protein 1 isoform X1 [Sus scrofa])	sp|Q32KL4|RMD1_BOVIN(Regulator of microtubule dynamics protein 1 OS=Bos taurus OX=9913 GN=RMDN1 PE=2 SV=1)	PF14559.6(TPR_19:Tetratricopeptide repeat)
Pig.18213.1	Pig.18213	Olfr524	olfactory receptor 6B1-like [Sus scrofa]	0	0.04	0	0	0	0	0	0	0	GO:0004930(molecular_function:G-protein coupled receptor activity); GO:0005886(cellular_component:plasma membrane); GO:0016021(cellular_component:integral component of membrane); GO:0004984(molecular_function:olfactory receptor activity)	K04257	OLFR	map04740(Olfactory transduction)	ENOG410YB1I(U:Intracellular trafficking, secretion, and vesicular transport)	XP_001926681.1(olfactory receptor 6B1-like [Sus scrofa])	sp|P23270|OL226_RAT(Olfactory receptor 226 OS=Rattus norvegicus OX=10116 GN=Olr226 PE=2 SV=2)	PF13853.6(7tm_4:Olfactory receptor); PF00001.21(7tm_1:7 transmembrane receptor (rhodopsin family))
Pig.12560.1	Pig.12560	CSTF3-201	cleavage stimulation factor subunit 3 isoform 1 [Homo sapiens]	6.95	4.96	6.29	2.23	1.91	2.5	2.67	4.94	4.67	GO:0006397(biological_process:mRNA processing); GO:0031123(biological_process:RNA 3'-end processing); GO:0031124(biological_process:mRNA 3'-end processing); GO:0005634(cellular_component:nucleus); GO:0000398(biological_process:mRNA splicing, via spliceosome); GO:0005654(cellular_component:nucleoplasm); GO:0003723(molecular_function:RNA binding); GO:0006369(biological_process:termination of RNA po…	K14408	CSTF3, RNA14	map03015(mRNA surveillance pathway)	COG5107(A:RNA processing and modification)	NP_001317.1(cleavage stimulation factor subunit 3 isoform 1 [Homo sapiens])	sp|Q12996|CSTF3_HUMAN(Cleavage stimulation factor subunit 3 OS=Homo sapiens OX=9606 GN=CSTF3 PE=1 SV=1)	PF05843.14(Suf:Suppressor of forked protein (Suf))
MSTRG.39436.1	MSTRG.39436			0.29	0.34	0.27	0.46	0.42	0.45	0.45	0.77	0.71	GO:0046425(biological_process:regulation of JAK-STAT cascade); GO:0003923(molecular_function:GPI-anchor transamidase activity); GO:0034394(biological_process:protein localization to cell surface); GO:0034235(molecular_function:GPI anchor binding); GO:0005886(cellular_component:plasma membrane); GO:0042765(cellular_component:GPI-anchor transamidase complex); GO:0016255(biological_process:attachmen…	K05293	PIGU	map00563(Glycosylphosphatidylinositol (GPI)-anchor biosynthesis)	ENOG410XST9(S:Function unknown)	NP_001172065.1(phosphatidylinositol glycan anchor biosynthesis class U protein precursor [Sus scrofa] >BAI47773.1 phosphatidylinositol glycan anchor biosynthesis, class U [Sus scrofa])	sp|Q9H490|PIGU_HUMAN(Phosphatidylinositol glycan anchor biosynthesis class U protein OS=Homo sapiens OX=9606 GN=PIGU PE=1 SV=3)	PF06728.13(PIG-U:GPI transamidase subunit PIG-U); PF02991.16(Atg8:Autophagy protein Atg8 ubiquitin like); PF04110.13(APG12:Ubiquitin-like autophagy protein Apg12)
Pig.06867.1	Pig.06867	TLCD5-201	transmembrane protein 136 isoform X1 [Sus scrofa]	0.06	0.16	0.06	0.15	0	0.15	0.37	0.28	0.29	GO:0016021(cellular_component:integral component of membrane)				ENOG410Z5I9(U:Intracellular trafficking, secretion, and vesicular transport)	XP_020918646.1(transmembrane protein 136 isoform X1 [Sus scrofa])	sp|Q6ZRR5|TM136_HUMAN(Transmembrane protein 136 OS=Homo sapiens OX=9606 GN=TMEM136 PE=2 SV=2)
Pig.16773.1	Pig.16773		leucine carboxyl methyltransferase 1-like isoform X1 [Sus scrofa]	0.28	0.28	0.14	0.47	0.25	0	0.13	1.04	0.42	GO:0008168(molecular_function:methyltransferase activity)	K18203	LCMT1		ENOG410YB9K(S:Function unknown)	XP_020942115.1(leucine carboxyl methyltransferase 1-like isoform X1 [Sus scrofa])	sp|Q9UIC8|LCMT1_HUMAN(Leucine carboxyl methyltransferase 1 OS=Homo sapiens OX=9606 GN=LCMT1 PE=1 SV=2)
Pig.07672.1	Pig.07672	ESPL1-201	LOW QUALITY PROTEIN: separin [Sus scrofa]	0.36	0.14	0.26	0.14	0.12	0.04	0.95	2.17	0.36	GO:0008233(molecular_function:peptidase activity); GO:0005634(cellular_component:nucleus)	K02365	ESP1	map04110(Cell cycle); map05166(Human T-cell leukemia virus 1 infection); map04114(Oocyte meiosis)	COG5155(D:Cell cycle control, cell division, chromosome partitioning); COG5155(O:Posttranslational modification, protein turnover, chaperones)	XP_013841684.2(LOW QUALITY PROTEIN: separin [Sus scrofa])	sp|Q14674|ESPL1_HUMAN(Separin OS=Homo sapiens OX=9606 GN=ESPL1 PE=1 SV=3)	PF03568.17(Peptidase_C50:Peptidase family C50); PF12770.7(CHAT:CHAT domain)
Pig.06111.1	Pig.06111	ZBTB38-201	zinc finger and BTB domain-containing protein 38 isoform X1 [Sus scrofa]	13.56	9.98	11.49	4.13	3.96	5.17	9.96	10.76	11.64	GO:0005654(cellular_component:nucleoplasm); GO:0006355(biological_process:regulation of transcription, DNA-templated); GO:0008327(molecular_function:methyl-CpG binding); GO:0005634(cellular_component:nucleus); GO:0006275(biological_process:regulation of DNA replication); GO:0006974(biological_process:cellular response to DNA damage stimulus); GO:0003700(molecular_function:transcription factor act…	K10510	ZBTB38		COG5048(S:Function unknown)	XP_005669952.1(zinc finger and BTB domain-containing protein 38 isoform X1 [Sus scrofa])	sp|Q8NAP3|ZBT38_HUMAN(Zinc finger and BTB domain-containing protein 38 OS=Homo sapiens OX=9606 GN=ZBTB38 PE=1 SV=2)	PF13465.6(zf-H2C2_2:Zinc-finger double domain); PF00651.31(BTB:BTB/POZ domain); PF00096.26(zf-C2H2:Zinc finger, C2H2 type); PF13894.6(zf-C2H2_4:C2H2-type zinc finger); PF12171.8(zf-C2H2_jaz:Zinc-finger double-stranded RNA-binding); PF16622.5(zf-C2H2_11:zinc-finger C2H2-type); PF15909.5(zf-C2H2_8:C2H2-type zinc ribbon)
Pig.11765.1	Pig.11765	AMER1-202	APC membrane recruitment protein 1 [Sus scrofa]	0.69	0.88	1.02	1.38	0.97	1.07	5.48	6.45	6.72	GO:0090090(biological_process:negative regulation of canonical Wnt signaling pathway); GO:1903364(biological_process:positive regulation of cellular protein catabolic process); GO:0016604(cellular_component:nuclear body); GO:1904713(molecular_function:beta-catenin destruction complex binding); GO:0090263(biological_process:positive regulation of canonical Wnt signaling pathway); GO:0005886(cellul…	K19407	AMER1		ENOG410XU7Y(S:Function unknown)	XP_005657869.1(APC membrane recruitment protein 1 [Sus scrofa])	sp|Q5JTC6|AMER1_HUMAN(APC membrane recruitment protein 1 OS=Homo sapiens OX=9606 GN=AMER1 PE=1 SV=2)	PF09422.10(WTX:WTX protein)
Pig.17117.1	Pig.17117	FGF19-201	fibroblast growth factor 19 [Sus scrofa]	0	0	0	0	0	0	0	0	0	GO:0008284(biological_process:positive regulation of cell proliferation); GO:0008083(molecular_function:growth factor activity); GO:0005104(molecular_function:fibroblast growth factor receptor binding); GO:0046330(biological_process:positive regulation of JNK cascade); GO:0070858(biological_process:negative regulation of bile acid biosynthetic process); GO:0010629(biological_process:negative regu…	K04358	FGF	map04810(Regulation of actin cytoskeleton); map05200(Pathways in cancer); map04015(Rap1 signaling pathway); map04014(Ras signaling pathway); map05218(Melanoma); map04010(MAPK signaling pathway); map05224(Breast cancer); map05226(Gastric cancer); map04151(PI3K-Akt signaling pathway)	ENOG4111IPH(S:Function unknown)	XP_003122468.1(fibroblast growth factor 19 [Sus scrofa])	sp|O95750|FGF19_HUMAN(Fibroblast growth factor 19 OS=Homo sapiens OX=9606 GN=FGF19 PE=1 SV=1)	PF00167.18(FGF:Fibroblast growth factor); PF06268.13(Fascin:Fascin domain)
Pig.01451.1	Pig.01451	LY96-202	lymphocyte antigen 96 [Sus scrofa]	4.43	2.72	7.02	4.58	1.99	4.08	4.44	8.1	7.07	GO:0032760(biological_process:positive regulation of tumor necrosis factor production); GO:0046696(cellular_component:lipopolysaccharide receptor complex); GO:0071222(biological_process:cellular response to lipopolysaccharide); GO:0031226(cellular_component:intrinsic component of plasma membrane); GO:0045087(biological_process:innate immune response); GO:0031666(biological_process:positive regula…	K05400	LY96, MD-2	map04620(Toll-like receptor signaling pathway); map04064(NF-kappa B signaling pathway); map05130(Pathogenic Escherichia coli infection); map05133(Pertussis); map05145(Toxoplasmosis)	ENOG411154R(O:Posttranslational modification, protein turnover, chaperones)	NP_001098426.1(lymphocyte antigen 96 [Sus scrofa])	sp|P58754|LY96_BOVIN(Lymphocyte antigen 96 OS=Bos taurus OX=9913 GN=LY96 PE=1 SV=1)	PF02221.15(E1_DerP2_DerF2:ML domain)
Pig.08074.1	Pig.08074	SPAG1-201	sperm-associated antigen 1 isoform X1 [Sus scrofa]	1.18	1.49	1.25	0.49	0.69	0.65	2.67	2.8	3.19		K19870	SPAG1		COG0457(K:Transcription)	XP_020944704.1(sperm-associated antigen 1 isoform X1 [Sus scrofa])	sp|Q07617|SPAG1_HUMAN(Sperm-associated antigen 1 OS=Homo sapiens OX=9606 GN=SPAG1 PE=1 SV=3)	PF00515.28(TPR_1:Tetratricopeptide repeat); PF07719.17(TPR_2:Tetratricopeptide repeat); PF13877.6(RPAP3_C:Potential Monad-binding region of RPAP3); PF13371.6(TPR_9:Tetratricopeptide repeat); PF13424.6(TPR_12:Tetratricopeptide repeat); PF14559.6(TPR_19:Tetratricopeptide repeat); PF13431.6(TPR_17:Tetratricopeptide repeat); PF01665.16(Rota_NSP3:Rotavirus non-structural protein NSP3)
Pig.05316.1	Pig.05316	SLIT2-201	LOW QUALITY PROTEIN: slit homolog 2 protein [Sus scrofa]	0.58	1.03	1.66	0.4	0.43	0.46	1.75	6.79	4.93	GO:0005576(cellular_component:extracellular region); GO:0005509(molecular_function:calcium ion binding)	K06839	SLIT2	map04360(Axon guidance)	COG4886(S:Function unknown)	VFV43089.1(slit homolog 2 isoform 1 [Lynx pardinus])	sp|O94813|SLIT2_HUMAN(Slit homolog 2 protein OS=Homo sapiens OX=9606 GN=SLIT2 PE=1 SV=1)	PF13855.6(LRR_8:Leucine rich repeat); PF00008.27(EGF:EGF-like domain); PF13306.6(LRR_5:BspA type Leucine rich repeat region (6 copies)); PF12799.7(LRR_4:Leucine Rich repeats (2 copies)); PF00054.23(Laminin_G_1:Laminin G domain); PF02210.24(Laminin_G_2:Laminin G domain); PF14580.6(LRR_9:Leucine-rich repeat); PF01463.24(LRRCT:Leucine rich repeat C-terminal domain); PF12661.7(hEGF:Human growth facto…
Pig.12001.1	Pig.12001	STK32A-201	LOW QUALITY PROTEIN: serine/threonine-protein kinase 32A [Sus scrofa]	0	0	0.03	0	0	0	0	0.04	0	GO:0004674(molecular_function:protein serine/threonine kinase activity); GO:0005524(molecular_function:ATP binding)	K08793	STK32, YANK		ENOG410XNPH(U:Intracellular trafficking, secretion, and vesicular transport)	XP_020940621.1(LOW QUALITY PROTEIN: serine/threonine-protein kinase 32A [Sus scrofa])	sp|Q8WU08|ST32A_HUMAN(Serine/threonine-protein kinase 32A OS=Homo sapiens OX=9606 GN=STK32A PE=1 SV=2)	PF00069.25(Pkinase:Protein kinase domain); PF07714.17(Pkinase_Tyr:Protein tyrosine kinase); PF14531.6(Kinase-like:Kinase-like); PF01636.23(APH:Phosphotransferase enzyme family)
Pig.08626.1	Pig.08626	MFAP2-202	microfibrillar-associated protein 2 isoform X1 [Sus scrofa]	0.98	1.06	0.09	0.31	0.76	0.99	100.13	187.3	110.89	GO:0001527(cellular_component:microfibril); GO:0048050(biological_process:post-embryonic eye morphogenesis); GO:0048048(biological_process:embryonic eye morphogenesis)				ENOG410YIKT(O:Posttranslational modification, protein turnover, chaperones)	XP_003127692.1(microfibrillar-associated protein 2 isoform X1 [Sus scrofa])	sp|P27424|MFAP2_BOVIN(Microfibrillar-associated protein 2 OS=Bos taurus OX=9913 GN=MFAP2 PE=1 SV=1)	PF05507.11(MAGP:Microfibril-associated glycoprotein (MAGP))
Pig.09936.1	Pig.09936	AGTPBP1-201	cytosolic carboxypeptidase 1 isoform X1 [Sus scrofa]	0.72	0.78	0.75	0.7	0.48	0.82	1.43	1.47	1.56	GO:0015631(molecular_function:tubulin binding); GO:0042133(biological_process:neurotransmitter metabolic process); GO:0005730(cellular_component:nucleolus); GO:0004181(molecular_function:metallocarboxypeptidase activity); GO:0021772(biological_process:olfactory bulb development); GO:0035609(biological_process:C-terminal protein deglutamylation); GO:0005739(cellular_component:mitochondrion); GO:00…				COG2866(E:Amino acid transport and metabolism)	XP_005656862.1(cytosolic carboxypeptidase 1 isoform X1 [Sus scrofa])	sp|Q9UPW5|CBPC1_HUMAN(Cytosolic carboxypeptidase 1 OS=Homo sapiens OX=9606 GN=AGTPBP1 PE=1 SV=3)	PF18027.1(Pepdidase_M14_N:Cytosolic carboxypeptidase N-terminal domain); PF00246.24(Peptidase_M14:Zinc carboxypeptidase); PF03224.14(V-ATPase_H_N:V-ATPase subunit H); PF04952.14(AstE_AspA:Succinylglutamate desuccinylase / Aspartoacylase family)
Pig.23725.1	Pig.23725	LSM14B-201	protein LSM14 homolog B isoform X1 [Sus scrofa]	6.32	9.84	7.48	4.81	4.31	4.29	13.74	16.08	20.15		K18749	LSM14, RAP55, SCD6		ENOG41122RA(S:Function unknown)	XP_020933866.1(protein LSM14 homolog B isoform X1 [Sus scrofa])	sp|Q8CGC4|LS14B_MOUSE(Protein LSM14 homolog B OS=Mus musculus OX=10090 GN=Lsm14b PE=1 SV=3)	PF12701.7(LSM14:Scd6-like Sm domain); PF09532.10(FDF:FDF domain); PF14438.6(SM-ATX:Ataxin 2 SM domain)
Pig.04040.1	Pig.04040	NUP37-201	nucleoporin Nup37 [Sus scrofa]	1.58	1.87	1.06	1.49	1.11	0.92	4.04	2.94	3.84	GO:0005654(cellular_component:nucleoplasm); GO:0000776(cellular_component:kinetochore); GO:0031080(cellular_component:nuclear pore outer ring)	K14302	NUP37	map03013(RNA transport)	ENOG410XSZQ(U:Intracellular trafficking, secretion, and vesicular transport)	XP_020948318.1(nucleoporin Nup37 [Sus scrofa])	sp|Q8NFH4|NUP37_HUMAN(Nucleoporin Nup37 OS=Homo sapiens OX=9606 GN=NUP37 PE=1 SV=1)	PF00400.32(WD40:WD domain, G-beta repeat)
Pig.10505.1	Pig.10505	EFNA4-201	ephrin-A4 isoform X1 [Sus scrofa]	1.6	4.04	3.1	1.79	1.63	1.42	0.07	0	0	GO:0048013(biological_process:ephrin receptor signaling pathway); GO:0016020(cellular_component:membrane); GO:0046875(molecular_function:ephrin receptor binding)	K05462	EFNA	map04015(Rap1 signaling pathway); map04014(Ras signaling pathway); map04151(PI3K-Akt signaling pathway); map04010(MAPK signaling pathway); map04360(Axon guidance)	ENOG4111FMJ(U:Intracellular trafficking, secretion, and vesicular transport)	XP_001929361.1(ephrin-A4 isoform X1 [Sus scrofa])	sp|O08542|EFNA4_MOUSE(Ephrin-A4 OS=Mus musculus OX=10090 GN=Efna4 PE=2 SV=2)	PF00812.17(Ephrin:Ephrin)
Pig.04343.1	Pig.04343	MED6-203	mediator of RNA polymerase II transcription subunit 6 [Sus scrofa]	13.24	8.41	15.26	9.26	4.76	6.67	6	7.56	8.36	GO:0019827(biological_process:stem cell population maintenance); GO:0070847(cellular_component:core mediator complex); GO:0051123(biological_process:RNA polymerase II transcriptional preinitiation complex assembly); GO:0007229(biological_process:integrin-mediated signaling pathway); GO:0003712(molecular_function:transcription cofactor activity); GO:0004222(molecular_function:metalloendopeptidase …	K15128	MED6		COG5097(K:Transcription)	XP_001928077.1(mediator of RNA polymerase II transcription subunit 6 [Sus scrofa])	sp|Q3SZY9|MED6_BOVIN(Mediator of RNA polymerase II transcription subunit 6 OS=Bos taurus OX=9913 GN=MED6 PE=2 SV=1)	PF04934.14(Med6:MED6 mediator sub complex component)
Pig.10686.1	Pig.10686	Hnrnpf	heterogeneous nuclear ribonucleoprotein F [Sus scrofa]	153.08	221.98	162.92	60.79	44.04	59.35	109.21	137.36	127.37	GO:0071013(cellular_component:catalytic step 2 spliceosome); GO:0043484(biological_process:regulation of RNA splicing); GO:0008380(biological_process:RNA splicing); GO:0005654(cellular_component:nucleoplasm); GO:0003727(molecular_function:single-stranded RNA binding); GO:0003723(molecular_function:RNA binding); GO:0005829(cellular_component:cytosol); GO:0005681(cellular_component:spliceosomal com…	K12898	HNRNPF_H		ENOG410Z6M0(S:Function unknown)	XP_001929089.1(heterogeneous nuclear ribonucleoprotein F [Sus scrofa])	sp|Q5E9J1|HNRPF_BOVIN(Heterogeneous nuclear ribonucleoprotein F OS=Bos taurus OX=9913 GN=HNRNPF PE=2 SV=3)	PF00076.22(RRM_1:RNA recognition motif. (a.k.a. RRM, RBD, or RNP domain)); PF08080.12(zf-RNPHF:RNPHF zinc finger)
Pig.11145.1	Pig.11145	RYR3-201	LOW QUALITY PROTEIN: ryanodine receptor 3 [Sus scrofa]	0.03	0.02	0.03	0.01	0.02	0.01	0.06	0.09	0.01	GO:0016021(cellular_component:integral component of membrane); GO:0005509(molecular_function:calcium ion binding); GO:0005623(cellular_component:cell); GO:0005219(molecular_function:ryanodine-sensitive calcium-release channel activity)	K04963	RYR3	map04921(Oxytocin signaling pathway); map04713(Circadian entrainment); map04970(Salivary secretion); map04020(Calcium signaling pathway); map05010(Alzheimer disease)	ENOG410YCNW(S:Function unknown)	XP_020955566.1(LOW QUALITY PROTEIN: ryanodine receptor 3 [Sus scrofa])	sp|Q15413|RYR3_HUMAN(Ryanodine receptor 3 OS=Homo sapiens OX=9606 GN=RYR3 PE=1 SV=3)	PF06459.12(RR_TM4-6:Ryanodine Receptor TM 4-6); PF01365.21(RYDR_ITPR:RIH domain); PF02026.16(RyR:RyR domain); PF08454.11(RIH_assoc:RyR and IP3R Homology associated); PF00520.31(Ion_trans:Ion transport protein); PF13833.6(EF-hand_8:EF-hand domain pair); PF00036.32(EF-hand_1:EF hand)
Pig.09157.1	Pig.09157	EPHB4-201	ephrin type-B receptor 4 [Sus scrofa]	12.63	17.2	11.68	5.92	5.13	5.13	19.56	28.74	20.74	GO:0043235(cellular_component:receptor complex); GO:0043005(cellular_component:neuron projection); GO:0005003(molecular_function:ephrin receptor activity); GO:0004714(molecular_function:transmembrane receptor protein tyrosine kinase activity); GO:0005005(molecular_function:transmembrane-ephrin receptor activity); GO:0005524(molecular_function:ATP binding); GO:0005887(cellular_component:integral c…	K05113	EPHB4, HTK	map04360(Axon guidance)	COG0515(S:Function unknown)	XP_003124419.1(ephrin type-B receptor 4 [Sus scrofa])	sp|P54760|EPHB4_HUMAN(Ephrin type-B receptor 4 OS=Homo sapiens OX=9606 GN=EPHB4 PE=1 SV=2)	PF07714.17(Pkinase_Tyr:Protein tyrosine kinase); PF01404.19(Ephrin_lbd:Ephrin receptor ligand binding domain); PF00069.25(Pkinase:Protein kinase domain); PF00041.21(fn3:Fibronectin type III domain); PF14575.6(EphA2_TM:Ephrin type-A receptor 2 transmembrane domain); PF00536.30(SAM_1:SAM domain (Sterile alpha motif)); PF07647.17(SAM_2:SAM domain (Sterile alpha motif)); PF07699.13(Ephrin_rec_like:Pu…
Pig.00779.1	Pig.00779	SP6-201	uncharacterized protein LOC106508909 [Sus scrofa]	0	0	0	0	0	0	0	0	0.08	GO:0016021(cellular_component:integral component of membrane)	K21108	BVES	map04530(Tight junction)		XP_020940232.1(uncharacterized protein LOC106508909 [Sus scrofa])
Pig.08135.1	Pig.08135	ANKRD49-201	ankyrin repeat domain-containing protein 49 [Sus scrofa]	6.28	8.93	7.74	3.62	2.77	3.23	5.29	7.55	5.73	GO:0005634(cellular_component:nucleus); GO:0007283(biological_process:spermatogenesis); GO:0030154(biological_process:cell differentiation); GO:0045893(biological_process:positive regulation of transcription, DNA-templated)	K21439	ANKRD49		COG0666(L:Replication, recombination and repair)	XP_003129838.1(ankyrin repeat domain-containing protein 49 [Sus scrofa])	sp|Q8WVL7|ANR49_HUMAN(Ankyrin repeat domain-containing protein 49 OS=Homo sapiens OX=9606 GN=ANKRD49 PE=1 SV=1)	PF12796.7(Ank_2:Ankyrin repeats (3 copies)); PF13637.6(Ank_4:Ankyrin repeats (many copies)); PF13857.6(Ank_5:Ankyrin repeats (many copies)); PF00023.30(Ank:Ankyrin repeat); PF13606.6(Ank_3:Ankyrin repeat)
Pig.05916.1	Pig.05916	MRGPRX1	mas-related G-protein coupled receptor member X2 [Sus scrofa]	0	0	0.04	0	0.02	0	0.3	0.34	0.32	GO:0004930(molecular_function:G-protein coupled receptor activity); GO:0007186(biological_process:G-protein coupled receptor signaling pathway); GO:0016021(cellular_component:integral component of membrane)	K08396	MRGPRX		ENOG4111AUB(S:Function unknown)	XP_013849950.2(mas-related G-protein coupled receptor member X2 [Sus scrofa])	sp|Q4QXU4|MRGX2_TRAFR(Mas-related G-protein coupled receptor member X2 OS=Trachypithecus francoisi OX=54180 GN=MRGPRX2 PE=3 SV=1)	PF00001.21(7tm_1:7 transmembrane receptor (rhodopsin family)); PF10328.9(7TM_GPCR_Srx:Serpentine type 7TM GPCR chemoreceptor Srx)
Pig.15909.1	Pig.15909	MRC2-201	LOW QUALITY PROTEIN: C-type mannose receptor 2 [Sus scrofa]	2.51	2.66	4.09	1.16	1.27	1.14	71.38	116.98	64.05		K06560	MRC, CD206, CD280	map05152(Tuberculosis); map04145(Phagosome)	ENOG410XQ89(U:Intracellular trafficking, secretion, and vesicular transport)	XP_020923800.1(LOW QUALITY PROTEIN: C-type mannose receptor 2 [Sus scrofa])	sp|Q9UBG0|MRC2_HUMAN(C-type mannose receptor 2 OS=Homo sapiens OX=9606 GN=MRC2 PE=1 SV=2)	PF00059.21(Lectin_C:Lectin C-type domain); PF05473.12(UL45:UL45 protein, carbohydrate-binding C-type lectin-like); PF00040.19(fn2:Fibronectin type II domain)
Pig.08610.1	Pig.08610	SPEN-201	LOW QUALITY PROTEIN: msx2-interacting protein [Sus scrofa]	11.76	12.86	11.6	3.86	2.87	3.71	8.75	14.27	12.62	GO:0003723(molecular_function:RNA binding)				ENOG410XQBG(K:Transcription); ENOG410XSAC(S:Function unknown)	XP_020951052.1(LOW QUALITY PROTEIN: msx2-interacting protein [Sus scrofa])	sp|Q96T58|MINT_HUMAN(Msx2-interacting protein OS=Homo sapiens OX=9606 GN=SPEN PE=1 SV=1)	PF07744.13(SPOC:SPOC domain); PF00076.22(RRM_1:RNA recognition motif. (a.k.a. RRM, RBD, or RNP domain))
Pig.13938.1	Pig.13938	CTNNA2	catenin alpha-2 isoform X1 [Sus scrofa]	0	0	0	0.02	0.03	0	0.12	0.33	0.09		K05691	CTNNA	map04390(Hippo signaling pathway); map05200(Pathways in cancer); map05100(Bacterial invasion of epithelial cells); map05213(Endometrial cancer); map04670(Leukocyte transendothelial migration); map05226(Gastric cancer); map05412(Arrhythmogenic right ventricular cardiomyopathy (ARVC)); map04520(Adherens junction)	ENOG410XSRU(S:Function unknown)	XP_020943863.1(catenin alpha-2 isoform X5 [Sus scrofa])	sp|P26232|CTNA2_HUMAN(Catenin alpha-2 OS=Homo sapiens OX=9606 GN=CTNNA2 PE=1 SV=5)	PF01044.19(Vinculin:Vinculin family)
MSTRG.10349.1	MSTRG.10349			0.53	0.6	0.72	0.73	0.51	0.59	1.93	2.47	2.96	GO:0046872(molecular_function:metal ion binding); GO:0005096(molecular_function:GTPase activator activity)	K12488	ASAP	map04666(Fc gamma R-mediated phagocytosis); map04144(Endocytosis)	COG5347(O:Posttranslational modification, protein turnover, chaperones)	XP_020943528.1(arf-GAP with SH3 domain, ANK repeat and PH domain-containing protein 2 isoform X7 [Sus scrofa])	sp|O43150|ASAP2_HUMAN(Arf-GAP with SH3 domain, ANK repeat and PH domain-containing protein 2 OS=Homo sapiens OX=9606 GN=ASAP2 PE=1 SV=3)	PF01412.18(ArfGap:Putative GTPase activating protein for Arf); PF16746.5(BAR_3:BAR domain of APPL family); PF12796.7(Ank_2:Ankyrin repeats (3 copies)); PF00169.29(PH:PH domain); PF14604.6(SH3_9:Variant SH3 domain); PF00018.28(SH3_1:SH3 domain); PF07653.17(SH3_2:Variant SH3 domain); PF00023.30(Ank:Ankyrin repeat); PF13857.6(Ank_5:Ankyrin repeats (many copies)); PF13637.6(Ank_4:Ankyrin repeats (man…
Pig.15430.1	Pig.15430	ARMH2-201	uncharacterized protein C6orf229 homolog [Sus scrofa]	0	0	0	0	0	0.05	0	0	0					ENOG410XYZN(S:Function unknown)	XP_003128255.1(uncharacterized protein C6orf229 homolog [Sus scrofa])	sp|H3BNL8|ARMD2_HUMAN(Armadillo-like helical domain-containing protein 2 OS=Homo sapiens OX=9606 GN=ARMH2 PE=4 SV=1)	PF17822.1(DUF5584:Family of unknown function (DUF5584))
Pig.07139.1	Pig.07139	RPL12	ribosomal protein L12, partial [synthetic construct]	0	0	0.31	0.35	0.06	0.21	0	0.13	0.51	GO:0070180(molecular_function:large ribosomal subunit rRNA binding); GO:0015934(cellular_component:large ribosomal subunit); GO:0005840(cellular_component:ribosome); GO:0022625(cellular_component:cytosolic large ribosomal subunit); GO:0019843(molecular_function:rRNA binding); GO:0003735(molecular_function:structural constituent of ribosome); GO:0006412(biological_process:translation); GO:0000027(…	K02870	RP-L12e, RPL12	map03010(Ribosome)	COG0080(S:Function unknown)	TKS48334.1(hypothetical protein Cadr_00016284 [Camelus dromedarius])	sp|P61284|RL12_BOVIN(60S ribosomal protein L12 OS=Bos taurus OX=9913 GN=RPL12 PE=2 SV=1)	PF03946.14(Ribosomal_L11_N:Ribosomal protein L11, N-terminal domain); PF00298.19(Ribosomal_L11:Ribosomal protein L11, RNA binding domain)
Pig.12382.1	Pig.12382	KISS1R-201	kiSS-1 receptor [Sus scrofa]	0	0	0	0.05	0.04	0	0	0	0.03	GO:0008528(molecular_function:G-protein coupled peptide receptor activity); GO:0007218(biological_process:neuropeptide signaling pathway); GO:0043231(cellular_component:intracellular membrane-bounded organelle); GO:0009986(cellular_component:cell surface); GO:0008188(molecular_function:neuropeptide receptor activity); GO:0004930(molecular_function:G-protein coupled receptor activity); GO:0005887(…	K08374	KISS1R	map04080(Neuroactive ligand-receptor interaction)	ENOG410XRW9(S:Function unknown)	NP_001038089.1(kiSS-1 receptor [Sus scrofa])	sp|Q969F8|KISSR_HUMAN(KiSS-1 receptor OS=Homo sapiens OX=9606 GN=KISS1R PE=1 SV=2)	PF00001.21(7tm_1:7 transmembrane receptor (rhodopsin family)); PF10320.9(7TM_GPCR_Srsx:Serpentine type 7TM GPCR chemoreceptor Srsx); PF13853.6(7tm_4:Olfactory receptor)
Pig.13389.1	Pig.13389	Btnl6	butyrophilin, subfamily 1, member precursor [Sus scrofa]	0	0	0	0	0	0	0	0	0	GO:0016021(cellular_component:integral component of membrane)	K06712	BTN, CD277		ENOG4111A9T(S:Function unknown)	NP_001231728.1(butyrophilin, subfamily 1, member precursor [Sus scrofa])	sp|P18892|BT1A1_BOVIN(Butyrophilin subfamily 1 member A1 OS=Bos taurus OX=9913 GN=BTN1A1 PE=1 SV=2)	PF07686.17(V-set:Immunoglobulin V-set domain); PF00622.28(SPRY:SPRY domain); PF13927.6(Ig_3:Immunoglobulin domain); PF13765.6(PRY:SPRY-associated domain)
Pig.14532.1	Pig.14532	PCDH20	protocadherin-20 [Sus scrofa]	0.06	0.05	0.01	0.02	0.01	0.01	0.21	0.26	0.18	GO:0016021(cellular_component:integral component of membrane); GO:0007156(biological_process:homophilic cell adhesion via plasma membrane adhesion molecules); GO:0005509(molecular_function:calcium ion binding); GO:0005886(cellular_component:plasma membrane)	K16498	PCDHD1		ENOG4110RHM(U:Intracellular trafficking, secretion, and vesicular transport)	XP_020921312.1(protocadherin-20 [Sus scrofa])	sp|Q8N6Y1|PCD20_HUMAN(Protocadherin-20 OS=Homo sapiens OX=9606 GN=PCDH20 PE=2 SV=2)	PF00028.17(Cadherin:Cadherin domain)
Pig.03225.1	Pig.03225	CDA-201	cytidine deaminase [Sus scrofa]	0.13	0	0.13	0.17	0.08	0.09	0.49	0.32	1.04	GO:0030308(biological_process:negative regulation of cell growth); GO:0051289(biological_process:protein homotetramerization); GO:0005829(cellular_component:cytosol); GO:0009972(biological_process:cytidine deamination); GO:0042803(molecular_function:protein homodimerization activity); GO:0001882(molecular_function:nucleoside binding); GO:0008270(molecular_function:zinc ion binding); GO:0071217(bi…	K01489	cdd, CDA	map00240(Pyrimidine metabolism); map00983(Drug metabolism - other enzymes)	COG0295(F:Nucleotide transport and metabolism)	NP_001231314.1(cytidine deaminase [Sus scrofa])	sp|P56389|CDD_MOUSE(Cytidine deaminase OS=Mus musculus OX=10090 GN=Cda PE=1 SV=2)	PF00383.23(dCMP_cyt_deam_1:Cytidine and deoxycytidylate deaminase zinc-binding region); PF08211.12(dCMP_cyt_deam_2:Cytidine and deoxycytidylate deaminase zinc-binding region)
Pig.12732.1	Pig.12732	Scn4b	sodium channel subunit beta-4 isoform X2 [Sus scrofa]	0.21	0.21	0.07	0.49	0.04	0.24	0.07	0.09	0.14	GO:0086006(molecular_function:voltage-gated sodium channel activity involved in cardiac muscle cell action potential); GO:0005244(molecular_function:voltage-gated ion channel activity); GO:0086002(biological_process:cardiac muscle cell action potential involved in contraction); GO:0016021(cellular_component:integral component of membrane); GO:0060307(biological_process:regulation of ventricular c…	K04848	SCN4B	map04261(Adrenergic signaling in cardiomyocytes)	ENOG4111PJ2(U:Intracellular trafficking, secretion, and vesicular transport)	XP_013832941.1(sodium channel subunit beta-4 isoform X2 [Sus scrofa])	sp|Q08E08|SCN4B_BOVIN(Sodium channel subunit beta-4 OS=Bos taurus OX=9913 GN=SCN4B PE=2 SV=1)	PF07686.17(V-set:Immunoglobulin V-set domain); PF13927.6(Ig_3:Immunoglobulin domain); PF00047.25(ig:Immunoglobulin domain); PF07679.16(I-set:Immunoglobulin I-set domain); PF13895.6(Ig_2:Immunoglobulin domain)
Pig.20811.1	Pig.20811	DEAF1-201	deformed epidermal autoregulatory factor 1 homolog isoform X1 [Sus scrofa]	9.65	16.91	12.13	11.87	13.79	16.64	15.38	18.35	17.52	GO:0001227(molecular_function:transcriptional repressor activity, RNA polymerase II transcription regulatory region sequence-specific binding); GO:0048706(biological_process:embryonic skeletal system development); GO:0005667(cellular_component:transcription factor complex); GO:0006366(biological_process:transcription from RNA polymerase II promoter); GO:0033599(biological_process:regulation of ma…				ENOG410ZMTP(S:Function unknown)	XP_003122437.2(deformed epidermal autoregulatory factor 1 homolog isoform X1 [Sus scrofa])	sp|O88450|DEAF1_RAT(Deformed epidermal autoregulatory factor 1 homolog OS=Rattus norvegicus OX=10116 GN=Deaf1 PE=1 SV=1)	PF01342.21(SAND:SAND domain); PF01753.18(zf-MYND:MYND finger)
MSTRG.45140.2	MSTRG.45140			1.4	0.99	1.59	1.47	1.06	1.63	0.98	1.4	1.14	GO:0003964(molecular_function:RNA-directed DNA polymerase activity)				ENOG4112A03(S:Function unknown); ENOG41120A8(S:Function unknown); ENOG410YGF6(S:Function unknown)	ELR60459.1(hypothetical protein M91_06316 [Bos mutus])	sp|O00370|LORF2_HUMAN(LINE-1 retrotransposable element ORF2 protein OS=Homo sapiens OX=9606 PE=1 SV=1)	PF03372.23(Exo_endo_phos:Endonuclease/Exonuclease/phosphatase family); PF14529.6(Exo_endo_phos_2:Endonuclease-reverse transcriptase); PF17490.2(Tnp_22_dsRBD:L1 transposable element dsRBD-like domain); PF02994.14(Transposase_22:L1 transposable element RBD-like domain)
MSTRG.45140.1	MSTRG.45140			2.58	1.42	1.79	1.44	0.78	1.53	1.11	2.36	2.47	GO:0005507(molecular_function:copper ion binding); GO:0006488(biological_process:dolichol-linked oligosaccharide biosynthetic process); GO:0017025(molecular_function:TBP-class protein binding); GO:0016021(cellular_component:integral component of membrane); GO:0006355(biological_process:regulation of transcription, DNA-templated); GO:0070897(biological_process:DNA-templated transcriptional preinit…					XP_028365193.1(LINE-1 type transposase domain-containing protein 1 [Phyllostomus discolor])	sp|Q9UN81|LORF1_HUMAN(LINE-1 retrotransposable element ORF1 protein OS=Homo sapiens OX=9606 GN=L1RE1 PE=1 SV=1)	PF02994.14(Transposase_22:L1 transposable element RBD-like domain)
Pig.18108.1	Pig.18108	CELF3-201	CUGBP Elav-like family member 3 isoform X1 [Heterocephalus glaber]	0	0	0	0	0	0	0	0	0	GO:0005737(cellular_component:cytoplasm); GO:0036002(molecular_function:pre-mRNA binding); GO:0016604(cellular_component:nuclear body); GO:0000381(biological_process:regulation of alternative mRNA splicing, via spliceosome); GO:0098781(biological_process:ncRNA transcription); GO:1990904(cellular_component:ribonucleoprotein complex); GO:0030317(biological_process:flagellated sperm motility); GO:00…	K13207	CUGBP, BRUNOL, CELF		ENOG410XNTW(S:Function unknown)	XP_021121602.1(CUGBP Elav-like family member 3 isoform X1 [Heterocephalus glaber])	sp|Q5SZQ8|CELF3_HUMAN(CUGBP Elav-like family member 3 OS=Homo sapiens OX=9606 GN=CELF3 PE=1 SV=1)	PF00076.22(RRM_1:RNA recognition motif. (a.k.a. RRM, RBD, or RNP domain))
Pig.09147.1	Pig.09147	FBXO24-201	LOW QUALITY PROTEIN: F-box only protein 24 [Sus scrofa]	0	0	0	0	0.01	0.02	0.09	0.03	0.02		K10304	FBXO24		ENOG41100N3(S:Function unknown)	XP_020941892.1(LOW QUALITY PROTEIN: F-box only protein 24 [Sus scrofa])	sp|Q9D417|FBX24_MOUSE(F-box only protein 24 OS=Mus musculus OX=10090 GN=Fbxo24 PE=2 SV=1)	PF12937.7(F-box-like:F-box-like); PF00646.33(F-box:F-box domain); PF00415.18(RCC1:Regulator of chromosome condensation (RCC1) repeat)
Pig.19144.1	Pig.19144	GPR137-202	integral membrane protein GPR137 isoform X1 [Sus scrofa]	4.41	4.28	3.84	2.5	2.13	1.94	12.58	12.89	11.07	GO:0016021(cellular_component:integral component of membrane)				ENOG410XQNA(D:Cell cycle control, cell division, chromosome partitioning)	XP_003122640.3(integral membrane protein GPR137 isoform X1 [Sus scrofa])	sp|Q17QQ5|G137A_BOVIN(Integral membrane protein GPR137 OS=Bos taurus OX=9913 GN=GPR137 PE=2 SV=2)
Pig.20527.1	Pig.20527	GMDS-201	hypothetical protein H355_008071 [Colinus virginianus]	13.3	18	17.41	18.73	16.43	21.1	12.74	12.48	14.15	GO:0008446(molecular_function:GDP-mannose 4,6-dehydratase activity); GO:0019673(biological_process:GDP-mannose metabolic process)	K01711	gmd, GMDS	map00520(Amino sugar and nucleotide sugar metabolism); map00051(Fructose and mannose metabolism)	COG1089(M:Cell wall/membrane/envelope biogenesis)	XP_020955407.1(GDP-mannose 4,6 dehydratase isoform X1 [Sus scrofa])	sp|O60547|GMDS_HUMAN(GDP-mannose 4,6 dehydratase OS=Homo sapiens OX=9606 GN=GMDS PE=1 SV=1)	PF16363.5(GDP_Man_Dehyd:GDP-mannose 4,6 dehydratase); PF01370.21(Epimerase:NAD dependent epimerase/dehydratase family)
Pig.17109.1	Pig.17109	MRGPRD	PREDICTED: mas-related G-protein coupled receptor member D-like [Bubalus bubalis]	0	0	0	0	0	0	0	0	0	GO:0004930(molecular_function:G-protein coupled receptor activity); GO:0007186(biological_process:G-protein coupled receptor signaling pathway); GO:0016021(cellular_component:integral component of membrane)	K08392	MRGPRD	map04614(Renin-angiotensin system)	ENOG41117F1(J:Translation, ribosomal structure and biogenesis)	XP_002699482.2(mas-related G-protein coupled receptor member D [Bos taurus])	sp|Q6L786|MRGRD_MACFA(Mas-related G-protein coupled receptor member D OS=Macaca fascicularis OX=9541 GN=MRGPRD PE=2 SV=1)	PF00001.21(7tm_1:7 transmembrane receptor (rhodopsin family))
Pig.14508.1	Pig.14508	CEBPA-201	CCAAT/enhancer-binding protein alpha [Sus scrofa]	31.12	37.39	36.26	48.18	40.53	42.95	156.51	171.79	204.52	GO:0030324(biological_process:lung development); GO:0030225(biological_process:macrophage differentiation); GO:0048469(biological_process:cell maturation); GO:0042593(biological_process:glucose homeostasis); GO:0090575(cellular_component:RNA polymerase II transcription factor complex); GO:0001889(biological_process:liver development); GO:0003677(molecular_function:DNA binding); GO:0045444(biologi…	K09055	CEBPA	map04932(Non-alcoholic fatty liver disease (NAFLD)); map05221(Acute myeloid leukemia); map05202(Transcriptional misregulation in cancer); map05200(Pathways in cancer)	ENOG410YJ8G(S:Function unknown); ENOG410XX4P(S:Function unknown)	XP_003127063.1(CCAAT/enhancer-binding protein alpha [Sus scrofa])	sp|O02754|CEBPA_BOVIN(CCAAT/enhancer-binding protein alpha OS=Bos taurus OX=9913 GN=CEBPA PE=3 SV=1)	PF07716.15(bZIP_2:Basic region leucine zipper); PF00170.21(bZIP_1:bZIP transcription factor)
Pig.12708.1	Pig.12708	CDC73-201	PREDICTED: parafibromin isoform X1 [Macaca mulatta]	8.81	7.8	7.73	3.74	3.33	4	7.66	9.66	10.27	GO:0071222(biological_process:cellular response to lipopolysaccharide); GO:0048147(biological_process:negative regulation of fibroblast proliferation); GO:0010390(biological_process:histone monoubiquitination); GO:0050680(biological_process:negative regulation of epithelial cell proliferation); GO:0030177(biological_process:positive regulation of Wnt signaling pathway); GO:0016593(cellular_compon…	K15175	CDC73		COG5157(K:Transcription)	TEA28601.1(hypothetical protein DBR06_SOUSAS16010025 [Sousa chinensis])	sp|Q6P1J9|CDC73_HUMAN(Parafibromin OS=Homo sapiens OX=9606 GN=CDC73 PE=1 SV=1)	PF16050.5(CDC73_N:Paf1 complex subunit CDC73 N-terminal)
Pig.17602.1	Pig.17602	SPNS2-201	protein spinster homolog 2 isoform X1 [Sus scrofa]	0.76	0.78	0.84	0.65	0.5	0.37	2.51	3.24	4.39	GO:0016021(cellular_component:integral component of membrane); GO:0055085(biological_process:transmembrane transport)				COG0477(S:Function unknown)	XP_020923362.1(protein spinster homolog 2 isoform X1 [Sus scrofa])	sp|Q8IVW8|SPNS2_HUMAN(Protein spinster homolog 2 OS=Homo sapiens OX=9606 GN=SPNS2 PE=1 SV=2)	PF07690.16(MFS_1:Major Facilitator Superfamily); PF00083.24(Sugar_tr:Sugar (and other) transporter); PF03137.20(OATP:Organic Anion Transporter Polypeptide (OATP) family)
Pig.15915.1	Pig.15915	ACE-203	angiotensin-converting enzyme isoform 2 precursor [Sus scrofa]	0.67	1.02	0.9	0.36	0.41	0.44	15.2	20.11	23.06	GO:0009897(cellular_component:external side of plasma membrane); GO:0004175(molecular_function:endopeptidase activity); GO:0008144(molecular_function:drug binding); GO:0008239(molecular_function:dipeptidyl-peptidase activity); GO:0008238(molecular_function:exopeptidase activity); GO:0010629(biological_process:negative regulation of gene expression); GO:0060047(biological_process:heart contraction…	K01283	ACE, CD143	map05142(Chagas disease (American trypanosomiasis)); map04614(Renin-angiotensin system); map04924(Renin secretion); map05410(Hypertrophic cardiomyopathy (HCM))	ENOG410XPJ3(S:Function unknown)	NP_001077410.2(angiotensin-converting enzyme isoform 2 precursor [Sus scrofa])	sp|P12822|ACE_RABIT(Angiotensin-converting enzyme OS=Oryctolagus cuniculus OX=9986 GN=ACE PE=1 SV=3)	PF01401.18(Peptidase_M2:Angiotensin-converting enzyme)
Pig.01439.1	Pig.01439	TRPA1-201	transient receptor potential cation channel subfamily A member 1 isoform X1 [Sus scrofa]	0.02	0.09	0.02	0.06	0.07	0.05	0	0	0.01	GO:0097604(molecular_function:temperature-gated cation channel activity); GO:0032421(cellular_component:stereocilium bundle); GO:0015278(molecular_function:calcium-release channel activity); GO:0005887(cellular_component:integral component of plasma membrane); GO:0050966(biological_process:detection of mechanical stimulus involved in sensory perception of pain); GO:0051289(biological_process:prot…	K04984	TRPA1, ANKTM1	map04750(Inflammatory mediator regulation of TRP channels)	COG0666(K:Transcription)	XP_001926150.2(transient receptor potential cation channel subfamily A member 1 isoform X1 [Sus scrofa])	sp|O75762|TRPA1_HUMAN(Transient receptor potential cation channel subfamily A member 1 OS=Homo sapiens OX=9606 GN=TRPA1 PE=1 SV=3)	PF12796.7(Ank_2:Ankyrin repeats (3 copies)); PF13637.6(Ank_4:Ankyrin repeats (many copies)); PF13606.6(Ank_3:Ankyrin repeat); PF00023.30(Ank:Ankyrin repeat); PF13857.6(Ank_5:Ankyrin repeats (many copies)); PF00520.31(Ion_trans:Ion transport protein)
Pig.11644.1	Pig.11644	NOMO1	nodal modulator 1 [Sus scrofa]	23.07	23.47	24.08	9.65	8.44	10.76	34.53	47.21	39	GO:0030246(molecular_function:carbohydrate binding); GO:0005789(cellular_component:endoplasmic reticulum membrane)				ENOG410XTI0(S:Function unknown)	XP_020942217.1(nodal modulator 1 [Sus scrofa])	sp|Q15155|NOMO1_HUMAN(Nodal modulator 1 OS=Homo sapiens OX=9606 GN=NOMO1 PE=1 SV=5)	PF13620.6(CarboxypepD_reg:Carboxypeptidase regulatory-like domain); PF17210.3(SdrD_B:SdrD B-like domain); PF09430.10(DUF2012:Protein of unknown function (DUF2012)); PF13715.6(CarbopepD_reg_2:CarboxypepD_reg-like domain); PF17802.1(SpaA:Prealbumin-like fold domain)
Pig.13395.1	Pig.13395	MMD-201	monocyte to macrophage differentiation factor [Sus scrofa]	4.29	3.98	4.58	2.91	2.56	2.69	203.86	220.03	132.64	GO:0019835(biological_process:cytolysis); GO:0005794(cellular_component:Golgi apparatus); GO:0038023(molecular_function:signaling receptor activity); GO:0016021(cellular_component:integral component of membrane); GO:0016020(cellular_component:membrane); GO:0005765(cellular_component:lysosomal membrane); GO:0045666(biological_process:positive regulation of neuron differentiation); GO:0005887(cellu…	K11064	MMD		COG1272(S:Function unknown)	NP_001038060.2(monocyte to macrophage differentiation factor [Sus scrofa])	sp|Q15546|PAQRB_HUMAN(Monocyte to macrophage differentiation factor OS=Homo sapiens OX=9606 GN=MMD PE=2 SV=2)	PF03006.20(HlyIII:Haemolysin-III related)
Pig.18063.1	Pig.18063	IRAK1-201	LOW QUALITY PROTEIN: interleukin-1 receptor-associated kinase 1 [Sus scrofa]	3.79	5.15	3.95	2.31	2.79	2.26	7.43	9.6	9.49		K04730	IRAK1	map05140(Leishmaniasis); map05152(Tuberculosis); map05142(Chagas disease (American trypanosomiasis)); map05162(Measles); map05133(Pertussis); map04010(MAPK signaling pathway); map05169(Epstein-Barr virus infection); map04620(Toll-like receptor signaling pathway); map04624(Toll and Imd signaling pathway); map04064(NF-kappa B signaling pathway); map04722(Neurotrophin signaling pathway); map05145(To…	COG0515(S:Function unknown)	XP_003135538.2(LOW QUALITY PROTEIN: interleukin-1 receptor-associated kinase 1 [Sus scrofa])	sp|Q2LGB3|IRAK1_BOVIN(Interleukin-1 receptor-associated kinase 1 OS=Bos taurus OX=9913 GN=IRAK1 PE=2 SV=2)	PF00069.25(Pkinase:Protein kinase domain); PF07714.17(Pkinase_Tyr:Protein tyrosine kinase); PF00531.22(Death:Death domain)
Pig.05221.1	Pig.05221	NHSL1-201	PREDICTED: NHS-like protein 1 isoform X3 [Bos taurus]	0.19	0	0.37	0.25	0.33	1.12	0	0.23	0					ENOG410XXZ7(S:Function unknown)	XP_026360683.1(uncharacterized protein LOC113259493 isoform X3 [Ursus arctos horribilis])
Pig.11456.1	Pig.11456	VARS-201	valine--tRNA ligase [Sus scrofa]	9.56	13.51	9.45	2.75	2.35	2.58	16.26	17.4	21.73	GO:0005737(cellular_component:cytoplasm); GO:0004832(molecular_function:valine-tRNA ligase activity); GO:0005524(molecular_function:ATP binding); GO:0002161(molecular_function:aminoacyl-tRNA editing activity); GO:0006438(biological_process:valyl-tRNA aminoacylation)	K01873	VARS, valS	map00970(Aminoacyl-tRNA biosynthesis)	COG0525(J:Translation, ribosomal structure and biogenesis)	NP_001182307.1(valine--tRNA ligase [Sus scrofa])	sp|P26640|SYVC_HUMAN(Valine--tRNA ligase OS=Homo sapiens OX=9606 GN=VARS PE=1 SV=4)	PF00133.22(tRNA-synt_1:tRNA synthetases class I (I, L, M and V)); PF08264.13(Anticodon_1:Anticodon-binding domain of tRNA); PF09334.11(tRNA-synt_1g:tRNA synthetases class I (M))
Pig.21515.1	Pig.21515	NME6-201	nucleoside diphosphate kinase 6 [Sus scrofa]	23.5	24.98	21.62	22.88	21.67	21.2	12.82	10.01	16.51	GO:0006228(biological_process:UTP biosynthetic process); GO:0006241(biological_process:CTP biosynthetic process); GO:0004550(molecular_function:nucleoside diphosphate kinase activity); GO:0006183(biological_process:GTP biosynthetic process); GO:0005524(molecular_function:ATP binding)	K00940	ndk, NME	map00240(Pyrimidine metabolism); map00983(Drug metabolism - other enzymes); map00230(Purine metabolism)	COG0105(O:Posttranslational modification, protein turnover, chaperones)	XP_003132226.1(nucleoside diphosphate kinase 6 [Sus scrofa])	sp|O75414|NDK6_HUMAN(Nucleoside diphosphate kinase 6 OS=Homo sapiens OX=9606 GN=NME6 PE=1 SV=3)	PF00334.19(NDK:Nucleoside diphosphate kinase)
Pig.14463.1	Pig.14463	SKAP1-201	src kinase-associated phosphoprotein 1 [Sus scrofa]	1.27	1	1.86	1.32	1.05	0.72	0.38	0.8	0.7	GO:0034116(biological_process:positive regulation of heterotypic cell-cell adhesion); GO:0035371(cellular_component:microtubule plus-end); GO:0050852(biological_process:T cell receptor signaling pathway); GO:0000226(biological_process:microtubule cytoskeleton organization); GO:0044853(cellular_component:plasma membrane raft); GO:0005737(cellular_component:cytoplasm); GO:0001726(cellular_component…	K17699	SKAP1, SKAP55	map04015(Rap1 signaling pathway)	ENOG410YF8P(T:Signal transduction mechanisms)	XP_013835427.2(src kinase-associated phosphoprotein 1 [Sus scrofa])	sp|Q86WV1|SKAP1_HUMAN(Src kinase-associated phosphoprotein 1 OS=Homo sapiens OX=9606 GN=SKAP1 PE=1 SV=3)	PF00169.29(PH:PH domain); PF00018.28(SH3_1:SH3 domain); PF14604.6(SH3_9:Variant SH3 domain); PF07653.17(SH3_2:Variant SH3 domain); PF15410.6(PH_9:Pleckstrin homology domain); PF15413.6(PH_11:Pleckstrin homology domain)
Pig.20537.1	Pig.20537	PLEKHG4B	LOW QUALITY PROTEIN: pleckstrin homology domain-containing family G member 4B [Sus scrofa]	0.2	0.23	0.08	0.2	0.07	0.03	0.04	0	0.12	GO:0005089(molecular_function:Rho guanyl-nucleotide exchange factor activity); GO:0035023(biological_process:regulation of Rho protein signal transduction)				ENOG410XSWY(T:Signal transduction mechanisms)	XP_020932485.1(LOW QUALITY PROTEIN: pleckstrin homology domain-containing family G member 4B [Sus scrofa])	sp|Q96PX9|PKH4B_HUMAN(Pleckstrin homology domain-containing family G member 4B OS=Homo sapiens OX=9606 GN=PLEKHG4B PE=1 SV=4)	PF00621.20(RhoGEF:RhoGEF domain)
Pig.14495.1	Pig.14495	ITGA3-201	integrin alpha-3 [Sus scrofa]	0.14	0.38	0.24	0.25	0.08	0.25	0.98	1.07	0.49	GO:0009897(cellular_component:external side of plasma membrane); GO:0030324(biological_process:lung development); GO:0007613(biological_process:memory); GO:0035024(biological_process:negative regulation of Rho protein signal transduction); GO:0030111(biological_process:regulation of Wnt signaling pathway); GO:0001764(biological_process:neuron migration); GO:0034667(cellular_component:integrin alp…	K06482	ITGA3, CD49c	map04640(Hematopoietic cell lineage); map05165(Human papillomavirus infection); map04510(Focal adhesion); map04810(Regulation of actin cytoskeleton); map04512(ECM-receptor interaction); map05200(Pathways in cancer); map05414(Dilated cardiomyopathy (DCM)); map05412(Arrhythmogenic right ventricular cardiomyopathy (ARVC)); map04151(PI3K-Akt signaling pathway); map05410(Hypertrophic cardiomyopathy (H…	ENOG410ZZD8(U:Intracellular trafficking, secretion, and vesicular transport)	XP_020922804.1(integrin alpha-3 [Sus scrofa])	sp|F1MMS9|ITA3_BOVIN(Integrin alpha-3 OS=Bos taurus OX=9913 GN=ITGA3 PE=3 SV=1)	PF08441.12(Integrin_alpha2:Integrin alpha); PF01839.23(FG-GAP:FG-GAP repeat); PF13517.6(VCBS:Repeat domain in Vibrio, Colwellia, Bradyrhizobium and Shewanella)
Pig.19591.1	Pig.19591	SERPINB9-201	serpin B9 [Sus scrofa]	3.39	3.03	5.11	2.26	1.58	2.13	3.6	5.82	5.12	GO:0009617(biological_process:response to bacterium); GO:0004867(molecular_function:serine-type endopeptidase inhibitor activity); GO:0042270(biological_process:protection from natural killer cell mediated cytotoxicity); GO:0033668(biological_process:negative regulation by symbiont of host apoptotic process); GO:0005615(cellular_component:extracellular space); GO:0005794(cellular_component:Golgi …	K13963	SERPINB	map05146(Amoebiasis)	COG4826(O:Posttranslational modification, protein turnover, chaperones)	NP_001104726.1(serpin B9 [Sus scrofa])	sp|P50453|SPB9_HUMAN(Serpin B9 OS=Homo sapiens OX=9606 GN=SERPINB9 PE=1 SV=1)	PF00079.20(Serpin:Serpin (serine protease inhibitor))
Pig.07806.1	Pig.07806	XIRP1	xin actin-binding repeat-containing protein 1 [Sus scrofa]	0.07	0.06	0.05	0.03	0	0.03	0.04	0.08	0.06	GO:0003779(molecular_function:actin binding); GO:0030054(cellular_component:cell junction); GO:0030036(biological_process:actin cytoskeleton organization)				ENOG410ZM11(S:Function unknown)	NP_001137400.1(xin actin-binding repeat-containing protein 1 [Sus scrofa])	sp|Q702N8|XIRP1_HUMAN(Xin actin-binding repeat-containing protein 1 OS=Homo sapiens OX=9606 GN=XIRP1 PE=1 SV=1)	PF08043.12(Xin:Xin repeat)
Pig.04494.1	Pig.04494	COMMD6-207	PREDICTED: COMM domain-containing protein 6 isoform X1 [Dipodomys ordii]	0.68	0.27	0.72	0.72	0.48	0.98	0.84	1.66	0.51	GO:0005737(cellular_component:cytoplasm); GO:0005634(cellular_component:nucleus); GO:0051059(molecular_function:NF-kappaB binding); GO:0032088(biological_process:negative regulation of NF-kappaB transcription factor activity)				ENOG4111RG7(S:Function unknown)	XP_012872120.1(PREDICTED: COMM domain-containing protein 6 isoform X1 [Dipodomys ordii])	sp|Q2KIY0|COMD6_BOVIN(COMM domain-containing protein 6 OS=Bos taurus OX=9913 GN=COMMD6 PE=3 SV=1)	PF07258.14(COMM_domain:COMM domain)
Pig.05926.1	Pig.05926	NELL1-205	protein kinase C-binding protein NELL1 isoform X1 [Sus scrofa]	0.11	0.08	0.25	0.16	0.17	0.07	0.08	0.14	0.09	GO:0016301(molecular_function:kinase activity); GO:0005509(molecular_function:calcium ion binding)				ENOG410XSZA(S:Function unknown)	XP_020940956.1(protein kinase C-binding protein NELL1 isoform X1 [Sus scrofa])	sp|Q92832|NELL1_HUMAN(Protein kinase C-binding protein NELL1 OS=Homo sapiens OX=9606 GN=NELL1 PE=1 SV=4)	PF07645.15(EGF_CA:Calcium-binding EGF domain); PF00093.18(VWC:von Willebrand factor type C domain); PF12947.7(EGF_3:EGF domain); PF12662.7(cEGF:Complement Clr-like EGF-like); PF12714.7(TILa:TILa domain); PF00008.27(EGF:EGF-like domain); PF02210.24(Laminin_G_2:Laminin G domain); PF13385.6(Laminin_G_3:Concanavalin A-like lectin/glucanases superfamily); PF12661.7(hEGF:Human growth factor-like EGF)
MSTRG.11364.1	MSTRG.11364			0.41	0.39	0.71	1.54	1.03	1.25	1.21	1.31	1.52	GO:0016021(cellular_component:integral component of membrane)	K12560	FCGR2B, CD32	map04666(Fc gamma R-mediated phagocytosis); map05152(Tuberculosis); map05150(Staphylococcus aureus infection); map04662(B cell receptor signaling pathway); map04380(Osteoclast differentiation); map05162(Measles); map04145(Phagosome)	ENOG410YXNK(U:Intracellular trafficking, secretion, and vesicular transport)	XP_020945179.1(low affinity immunoglobulin gamma Fc region receptor II-b-like isoform X1 [Sus scrofa])	sp|Q28110|FCGR2_BOVIN(Low affinity immunoglobulin gamma Fc region receptor II OS=Bos taurus OX=9913 GN=FCGR2 PE=2 SV=1)
Pig.00242.1	Pig.00242	CD302-203	CD302 antigen precursor [Sus scrofa]	39.5	19.13	29.98	14.05	12.02	9.98	9.24	10.77	6.07	GO:0030175(cellular_component:filopodium); GO:0016021(cellular_component:integral component of membrane); GO:0006909(biological_process:phagocytosis); GO:0030246(molecular_function:carbohydrate binding); GO:0005938(cellular_component:cell cortex)	K06722;K06559	CD302;LY75, CD205		ENOG41126J3(U:Intracellular trafficking, secretion, and vesicular transport); ENOG410XPJ1(U:Intracellular trafficking, secretion, and vesicular transport)	NP_001103895.1(CD302 antigen precursor [Sus scrofa])	sp|A8WH75|CD302_PIG(CD302 antigen OS=Sus scrofa OX=9823 GN=CD302 PE=2 SV=1)	PF00059.21(Lectin_C:Lectin C-type domain)
Pig.08628.1	Pig.08628	SDHB-201	NR:NA	177.12	155.13	127.36	98.17	101.08	104.25	108.49	127.16	136.75	GO:0006105(biological_process:succinate metabolic process); GO:0005749(cellular_component:mitochondrial respiratory chain complex II, succinate dehydrogenase complex (ubiquinone)); GO:0051538(molecular_function:3 iron, 4 sulfur cluster binding); GO:0051539(molecular_function:4 iron, 4 sulfur cluster binding); GO:0051537(molecular_function:2 iron, 2 sulfur cluster binding); GO:0005739(cellular_com…	K00235	SDHB, SDH2	map04932(Non-alcoholic fatty liver disease (NAFLD)); map05012(Parkinson disease); map05010(Alzheimer disease); map05016(Huntington disease); map04714(Thermogenesis); map00020(Citrate cycle (TCA cycle)); map00190(Oxidative phosphorylation)	COG0479(C:Energy production and conversion)	NP_001098423.1(succinate dehydrogenase [ubiquinone] iron-sulfur subunit, mitochondrial precursor [Sus scrofa])	sp|Q007T0|SDHB_PIG(Succinate dehydrogenase [ubiquinone] iron-sulfur subunit, mitochondrial OS=Sus scrofa OX=9823 GN=SDHB PE=1 SV=1)	PF13085.6(Fer2_3:2Fe-2S iron-sulfur cluster binding domain); PF13534.6(Fer4_17:4Fe-4S dicluster domain); PF13183.6(Fer4_8:4Fe-4S dicluster domain); PF13237.6(Fer4_10:4Fe-4S dicluster domain); PF00111.27(Fer2:2Fe-2S iron-sulfur cluster binding domain)
Pig.07527.1	Pig.07527	LRRK2-201	leucine-rich repeat serine/threonine-protein kinase 2 [Sus scrofa]	0.96	0.71	1.3	0.82	0.52	0.78	3.25	3.23	4.61	GO:0004672(molecular_function:protein kinase activity); GO:0005524(molecular_function:ATP binding); GO:0005525(molecular_function:GTP binding)	K08844	LRRK2	map05012(Parkinson disease)	COG4886(S:Function unknown)	NP_001106908.2(leucine-rich repeat serine/threonine-protein kinase 2 [Sus scrofa])	sp|Q5S007|LRRK2_HUMAN(Leucine-rich repeat serine/threonine-protein kinase 2 OS=Homo sapiens OX=9606 GN=LRRK2 PE=1 SV=2)	PF00069.25(Pkinase:Protein kinase domain); PF07714.17(Pkinase_Tyr:Protein tyrosine kinase); PF08477.13(Roc:Ras of Complex, Roc, domain of DAPkinase); PF13855.6(LRR_8:Leucine rich repeat); PF12799.7(LRR_4:Leucine Rich repeats (2 copies)); PF16095.5(COR:C-terminal of Roc, COR, domain); PF00071.22(Ras:Ras family); PF14580.6(LRR_9:Leucine-rich repeat); PF00025.21(Arf:ADP-ribosylation factor family)
Pig.11676.1	Pig.11676	FZD4-201	LOW QUALITY PROTEIN: frizzled-4 [Sus scrofa]	16.24	16.45	16.6	10.82	13.48	20.51	223.76	263.71	226.56	GO:0061304(biological_process:retinal blood vessel morphogenesis); GO:0038023(molecular_function:signaling receptor activity); GO:0061301(biological_process:cerebellum vasculature morphogenesis); GO:0034446(biological_process:substrate adhesion-dependent cell spreading); GO:0019955(molecular_function:cytokine binding); GO:0030425(cellular_component:dendrite); GO:0061024(biological_process:membran…	K02354	FZD4, fz4, CD344	map05205(Proteoglycans in cancer); map05165(Human papillomavirus infection); map04390(Hippo signaling pathway); map05200(Pathways in cancer); map04550(Signaling pathways regulating pluripotency of stem cells); map05217(Basal cell carcinoma); map04310(Wnt signaling pathway); map05225(Hepatocellular carcinoma); map05224(Breast cancer); map04934(Cushing syndrome); map05226(Gastric cancer); map04150(…	ENOG410XRC8(O:Posttranslational modification, protein turnover, chaperones)	XP_005667267.2(LOW QUALITY PROTEIN: frizzled-4 [Sus scrofa])	sp|Q9ULV1|FZD4_HUMAN(Frizzled-4 OS=Homo sapiens OX=9606 GN=FZD4 PE=1 SV=2)	PF01534.17(Frizzled:Frizzled/Smoothened family membrane region); PF01392.22(Fz:Fz domain)
MSTRG.41953.1	MSTRG.41953			7.05	2.72	7.05	15.06	16.59	35.59	24.3	36.83	8.07	GO:0005507(molecular_function:copper ion binding); GO:0055114(biological_process:oxidation-reduction process)					XP_028365193.1(LINE-1 type transposase domain-containing protein 1 [Phyllostomus discolor])		PF17489.2(Tnp_22_trimer:L1 transposable element trimerization domain)
Pig.05235.1	Pig.05235	IL22RA2-201	interleukin-22 receptor subunit alpha-2 [Sus scrofa]	0	0	0	0	0	0	0	0	0.07		K05139	IL22RA2	map04630(Jak-STAT signaling pathway)	ENOG410YNE2(O:Posttranslational modification, protein turnover, chaperones)	XP_003121227.1(interleukin-22 receptor subunit alpha-2 [Sus scrofa])	sp|Q969J5|I22R2_HUMAN(Interleukin-22 receptor subunit alpha-2 OS=Homo sapiens OX=9606 GN=IL22RA2 PE=1 SV=1)	PF01108.17(Tissue_fac:Tissue factor); PF09294.10(Interfer-bind:Interferon-alpha/beta receptor, fibronectin type III)
Pig.22462.1	Pig.22462	ZC3H3-201	zinc finger CCCH domain-containing protein 3 isoform X2 [Sus scrofa]	1.71	2.27	1.98	0.95	0.76	1.19	4.23	4.53	3.64	GO:0046872(molecular_function:metal ion binding)				COG5084(S:Function unknown)	XP_020946076.1(zinc finger CCCH domain-containing protein 3 isoform X2 [Sus scrofa])	sp|Q8IXZ2|ZC3H3_HUMAN(Zinc finger CCCH domain-containing protein 3 OS=Homo sapiens OX=9606 GN=ZC3H3 PE=1 SV=3)	PF00642.24(zf-CCCH:Zinc finger C-x8-C-x5-C-x3-H type (and similar)); PF16131.5(Torus:Torus domain); PF18345.1(zf_CCCH_4:Zinc finger domain)
Pig.16542.1	Pig.16542	TEKT5-201	tektin-5 [Sus scrofa]	0	0	0	0	0	0.02	0	0	0	GO:0036126(cellular_component:sperm flagellum); GO:0015630(cellular_component:microtubule cytoskeleton); GO:0060294(biological_process:cilium movement involved in cell motility); GO:0060271(biological_process:cilium assembly)	K18632	TEKT5		ENOG410XSCN(S:Function unknown)	XP_003354660.2(tektin-5 [Sus scrofa])	sp|Q2YDI7|TEKT5_BOVIN(Tektin-5 OS=Bos taurus OX=9913 GN=TEKT5 PE=2 SV=1)	PF03148.14(Tektin:Tektin family)
Pig.15079.1	Pig.15079	BACE2	beta-secretase 2 isoform X2 [Sus scrofa]	13.65	15.47	14.45	10.22	8.41	11.33	10.72	11.57	7.33	GO:0005794(cellular_component:Golgi apparatus); GO:0005802(cellular_component:trans-Golgi network); GO:0001540(molecular_function:beta-amyloid binding); GO:0042593(biological_process:glucose homeostasis); GO:0016021(cellular_component:integral component of membrane); GO:0016020(cellular_component:membrane); GO:0042985(biological_process:negative regulation of amyloid precursor protein biosyntheti…	K07747	BACE2	map05010(Alzheimer disease)	ENOG410XNV7(O:Posttranslational modification, protein turnover, chaperones)	XP_004003403.2(beta-secretase 2 [Ovis aries])	sp|Q9Y5Z0|BACE2_HUMAN(Beta-secretase 2 OS=Homo sapiens OX=9606 GN=BACE2 PE=1 SV=1)	PF00026.23(Asp:Eukaryotic aspartyl protease); PF14541.6(TAXi_C:Xylanase inhibitor C-terminal); PF14543.6(TAXi_N:Xylanase inhibitor N-terminal)
Pig.16386.1	Pig.16386	PRDM11-201	PR domain-containing protein 11 isoform X2 [Sus scrofa]	0.47	0.6	0.84	0.51	0.51	0.64	2.11	2.92	3.12						XP_020938807.1(PR domain-containing protein 11 isoform X2 [Sus scrofa])	sp|Q9NQV5|PRD11_HUMAN(PR domain-containing protein 11 OS=Homo sapiens OX=9606 GN=PRDM11 PE=1 SV=2)	PF00856.28(SET:SET domain)
MSTRG.13661.2	MSTRG.13661			0	0	0	0	0	0	0	0.02	0.01	GO:0003700(molecular_function:transcription factor activity, sequence-specific DNA binding); GO:0016021(cellular_component:integral component of membrane); GO:0003677(molecular_function:DNA binding)				ENOG410XPRK(S:Function unknown)	XP_020947644.1(myelin regulatory factor-like protein [Sus scrofa])	sp|F1N4M2|MRFL_BOVIN(Myelin regulatory factor-like protein OS=Bos taurus OX=9913 GN=MYRFL PE=2 SV=1)
Pig.05918.1	Pig.05918	CSRP3-201	cysteine and glycine-rich protein 3 [Sus scrofa]	0.16	0	0	0.23	0	0	0	0	0	GO:0030036(biological_process:actin cytoskeleton organization); GO:0042593(biological_process:glucose homeostasis); GO:0060048(biological_process:cardiac muscle contraction); GO:0030018(cellular_component:Z disc); GO:0005737(cellular_component:cytoplasm); GO:0035995(biological_process:detection of muscle stretch); GO:0005634(cellular_component:nucleus); GO:0003300(biological_process:cardiac muscl…	K09377	CSRP		ENOG410Z840(S:Function unknown)	NP_001165839.1(cysteine and glycine-rich protein 3 [Sus scrofa])	sp|P50461|CSRP3_HUMAN(Cysteine and glycine-rich protein 3 OS=Homo sapiens OX=9606 GN=CSRP3 PE=1 SV=1)	PF00412.22(LIM:LIM domain)
Pig.08241.1	Pig.08241	PNPT1-201	polyribonucleotide nucleotidyltransferase 1, mitochondrial [Sus scrofa]	9.92	6.81	10.2	3.09	1.66	2.83	3.75	3.5	3.6	GO:0006402(biological_process:mRNA catabolic process); GO:0004654(molecular_function:polyribonucleotide nucleotidyltransferase activity); GO:0003723(molecular_function:RNA binding); GO:0006396(biological_process:RNA processing)	K00962	pnp, PNPT1	map00240(Pyrimidine metabolism); map03018(RNA degradation); map00230(Purine metabolism)	COG1185(S:Function unknown)	NP_001233196.1(polyribonucleotide nucleotidyltransferase 1, mitochondrial [Sus scrofa])	sp|Q8TCS8|PNPT1_HUMAN(Polyribonucleotide nucleotidyltransferase 1, mitochondrial OS=Homo sapiens OX=9606 GN=PNPT1 PE=1 SV=2)	PF01138.21(RNase_PH:3' exoribonuclease family, domain 1); PF03725.15(RNase_PH_C:3' exoribonuclease family, domain 2); PF03726.14(PNPase:Polyribonucleotide nucleotidyltransferase, RNA binding domain); PF00013.29(KH_1:KH domain); PF00575.23(S1:S1 RNA binding domain)
Pig.14256.1	Pig.14256	CARMIL2-201	capping protein, Arp2/3 and myosin-I linker protein 2 isoform X2 [Sus scrofa]	0.23	0.27	0.17	0.15	0.16	0.16	0.38	0.35	0.41		K20493	LRRC16, CARMIL		ENOG410YEE1(S:Function unknown)	XP_020949747.1(capping protein, Arp2/3 and myosin-I linker protein 2 isoform X1 [Sus scrofa])	sp|Q6F5E8|CARL2_HUMAN(Capping protein, Arp2/3 and myosin-I linker protein 2 OS=Homo sapiens OX=9606 GN=CARMIL2 PE=1 SV=2)	PF16000.5(CARMIL_C:CARMIL C-terminus); PF17888.1(Carm_PH:Carmil pleckstrin homology domain); PF13516.6(LRR_6:Leucine Rich repeat)
Pig.00057.1	Pig.00057	MOBKL3-201	MOB-like protein phocein [Rattus norvegicus]	9.93	10.09	10.83	4.25	2.92	2.99	9.37	9.73	10.22	GO:0005737(cellular_component:cytoplasm); GO:0005794(cellular_component:Golgi apparatus); GO:0016020(cellular_component:membrane); GO:0043197(cellular_component:dendritic spine); GO:0005829(cellular_component:cytosol); GO:0016301(molecular_function:kinase activity); GO:0006900(biological_process:membrane budding); GO:0019900(molecular_function:kinase binding); GO:0032580(cellular_component:Golgi …				ENOG410XNS1(S:Function unknown)	VFV38479.1(mps one binder kinase [Lynx pardinus])	sp|Q9Y3A3|PHOCN_HUMAN(MOB-like protein phocein OS=Homo sapiens OX=9606 GN=MOB4 PE=1 SV=1)	PF03637.17(Mob1_phocein:Mob1/phocein family)
Pig.04939.1	Pig.04939	TBX19-201	T-box transcription factor TBX19 isoform X2 [Sus scrofa]	0	0	0	0	0	0	0	0	0	GO:0042127(biological_process:regulation of cell proliferation); GO:0045165(biological_process:cell fate commitment); GO:0003700(molecular_function:transcription factor activity, sequence-specific DNA binding); GO:0005634(cellular_component:nucleus); GO:0001228(molecular_function:transcriptional activator activity, RNA polymerase II transcription regulatory region sequence-specific binding); GO:0…	K10184	TBX19		ENOG410XSTS(K:Transcription)	TKS27866.1(hypothetical protein Cadr_00025150 [Camelus dromedarius])	sp|Q5XNS0|TBX19_CANLF(T-box transcription factor TBX19 OS=Canis lupus familiaris OX=9615 GN=TBX19 PE=2 SV=1)
Pig.15907.1	Pig.15907	Pig.15907	uncharacterized protein LOC110256160 [Sus scrofa]	0.05	0.05	0	0.03	0.09	0.07	0	0	0.05	GO:0006468(biological_process:protein phosphorylation); GO:0018105(biological_process:peptidyl-serine phosphorylation); GO:0071480(biological_process:cellular response to gamma radiation); GO:0032435(biological_process:negative regulation of proteasomal ubiquitin-dependent protein catabolic process); GO:0006325(biological_process:chromatin organization); GO:0005634(cellular_component:nucleus); GO…				ENOG410Y3FX(D:Cell cycle control, cell division, chromosome partitioning); ENOG410Y3FX(T:Signal transduction mechanisms); ENOG410Y3FX(Z:Cytoskeleton)	XP_020923737.1(uncharacterized protein LOC110256160 [Sus scrofa])
Pig.13143.1	Pig.13143	TJP1-201	tight junction protein ZO-1 isoform X1 [Sus scrofa]	23.33	25.88	23.75	8.01	7.75	9.61	43.74	57.29	61.14		K05701	TJP1, ZO1	map04540(Gap junction); map05120(Epithelial cell signaling in Helicobacter pylori infection); map05132(Salmonella infection); map04530(Tight junction); map04520(Adherens junction); map05110(Vibrio cholerae infection)	ENOG410XQP3(E:Amino acid transport and metabolism)	XP_020954486.1(tight junction protein ZO-1 isoform X1 [Sus scrofa])	sp|O97758|ZO1_CANLF(Tight junction protein ZO-1 OS=Canis lupus familiaris OX=9615 GN=TJP1 PE=1 SV=1)	PF00595.24(PDZ:PDZ domain); PF00791.20(ZU5:ZU5 domain); PF17820.1(PDZ_6:PDZ domain); PF13180.6(PDZ_2:PDZ domain); PF00625.21(Guanylate_kin:Guanylate kinase); PF07653.17(SH3_2:Variant SH3 domain)
Pig.13020.1	Pig.13020	SPAG17	LOW QUALITY PROTEIN: sperm-associated antigen 17 [Sus scrofa]	0.01	0	0	0.01	0.03	0.04	4.77	4.25	5.16					ENOG410ZGKQ(S:Function unknown)	XP_020945631.1(LOW QUALITY PROTEIN: sperm-associated antigen 17 [Sus scrofa])	sp|Q6Q759|SPG17_HUMAN(Sperm-associated antigen 17 OS=Homo sapiens OX=9606 GN=SPAG17 PE=2 SV=1)	PF14874.6(PapD-like:Flagellar-associated PapD-like)
Pig.09213.1	Pig.09213	BCL7B-202	B-cell CLL/lymphoma 7 protein family member B isoform X1 [Sus scrofa]	12.75	15.04	11.96	6.84	3.3	6.53	31.5	48.79	38.28	GO:0030154(biological_process:cell differentiation); GO:0006915(biological_process:apoptotic process); GO:0016055(biological_process:Wnt signaling pathway)				ENOG4111TES(B:Chromatin structure and dynamics); ENOG4111TES(K:Transcription)	XP_003354546.1(B-cell CLL/lymphoma 7 protein family member B isoform X1 [Sus scrofa])	sp|Q3T0A6|BCL7B_BOVIN(B-cell CLL/lymphoma 7 protein family member B OS=Bos taurus OX=9913 GN=BCL7B PE=2 SV=1)	PF04714.13(BCL_N:BCL7, N-terminal conserver region)
Pig.01982.1	Pig.01982	PCGF5-201	polycomb group RING finger protein 5 isoform X1 [Sus scrofa]	13.16	9.45	9.86	3.35	1.13	2.91	4.24	6.96	5.98	GO:0036353(biological_process:histone H2A-K119 monoubiquitination); GO:0031519(cellular_component:PcG protein complex); GO:0060819(biological_process:inactivation of X chromosome by genetic imprinting); GO:0005730(cellular_component:nucleolus); GO:0003700(molecular_function:transcription factor activity, sequence-specific DNA binding); GO:0005813(cellular_component:centrosome); GO:0005634(cellula…	K11489	PCGF5	map04550(Signaling pathways regulating pluripotency of stem cells)	ENOG410XPCN(F:Nucleotide transport and metabolism)	XP_003133191.1(polycomb group RING finger protein 5 isoform X1 [Sus scrofa])	sp|Q86SE9|PCGF5_HUMAN(Polycomb group RING finger protein 5 OS=Homo sapiens OX=9606 GN=PCGF5 PE=1 SV=1)	PF16207.5(RAWUL:RAWUL domain RING finger- and WD40-associated ubiquitin-like); PF13923.6(zf-C3HC4_2:Zinc finger, C3HC4 type (RING finger)); PF00097.25(zf-C3HC4:Zinc finger, C3HC4 type (RING finger)); PF13445.6(zf-RING_UBOX:RING-type zinc-finger); PF15227.6(zf-C3HC4_4:zinc finger of C3HC4-type, RING); PF13639.6(zf-RING_2:Ring finger domain); PF13920.6(zf-C3HC4_3:Zinc finger, C3HC4 type (RING finge…
Pig.19962.1	Pig.19962	LOC101153177	PREDICTED: RNA-binding protein 4 isoform X1 [Canis lupus familiaris]	25.67	39.62	26.5	19.16	16.14	15.24	28.13	28.95	33.04	GO:0010494(cellular_component:cytoplasmic stress granule); GO:0016607(cellular_component:nuclear speck); GO:0035198(molecular_function:miRNA binding); GO:0030332(molecular_function:cyclin binding); GO:0005730(cellular_component:nucleolus); GO:0097158(molecular_function:pre-mRNA intronic pyrimidine-rich binding); GO:0032055(biological_process:negative regulation of translation in response to stres…	K13187	RBM4		ENOG41105PP(S:Function unknown)	TKC36575.1(hypothetical protein EI555_003498, partial [Monodon monoceros])	sp|Q3MHX3|RBM4_BOVIN(RNA-binding protein 4 OS=Bos taurus OX=9913 GN=RBM4 PE=2 SV=1)	PF00076.22(RRM_1:RNA recognition motif. (a.k.a. RRM, RBD, or RNP domain)); PF13893.6(RRM_5:RNA recognition motif. (a.k.a. RRM, RBD, or RNP domain)); PF00098.23(zf-CCHC:Zinc knuckle); PF16367.5(RRM_7:RNA recognition motif); PF16842.5(RRM_occluded:Occluded RNA-recognition motif)
Pig.07044.1	Pig.07044	EEPD1-201	endonuclease/exonuclease/phosphatase family domain-containing protein 1 [Sus scrofa]	1.24	1.43	2.33	1.12	1.44	1.26	23.42	26.81	36.13	GO:0004519(molecular_function:endonuclease activity); GO:0004527(molecular_function:exonuclease activity); GO:0006281(biological_process:DNA repair); GO:0003677(molecular_function:DNA binding)				COG1555(L:Replication, recombination and repair)	XP_013841174.2(endonuclease/exonuclease/phosphatase family domain-containing protein 1 [Sus scrofa])	sp|Q3MHJ7|EEPD1_BOVIN(Endonuclease/exonuclease/phosphatase family domain-containing protein 1 OS=Bos taurus OX=9913 GN=EEPD1 PE=2 SV=1)	PF12836.7(HHH_3:Helix-hairpin-helix motif); PF00633.23(HHH:Helix-hairpin-helix motif); PF14579.6(HHH_6:Helix-hairpin-helix motif); PF03934.13(T2SSK:Type II secretion system (T2SS), protein K); PF03372.23(Exo_endo_phos:Endonuclease/Exonuclease/phosphatase family)
Pig.17824.1	Pig.17824	CHCHD4-201	mitochondrial intermembrane space import and assembly protein 40 [Sus scrofa]	8.19	8.29	11.39	4.43	3.24	2.73	7.57	5.96	7.89	GO:0018171(biological_process:peptidyl-cysteine oxidation); GO:0051084(biological_process:'de novo' posttranslational protein folding); GO:0005623(cellular_component:cell); GO:0045041(biological_process:protein import into mitochondrial intermembrane space); GO:0022417(biological_process:protein maturation by protein folding); GO:0005758(cellular_component:mitochondrial intermembrane space); GO:0…	K17782	MIA40, CHCHD4		ENOG4111V0I(O:Posttranslational modification, protein turnover, chaperones)	NP_001230428.1(mitochondrial intermembrane space import and assembly protein 40 [Sus scrofa])	sp|Q8VEA4|MIA40_MOUSE(Mitochondrial intermembrane space import and assembly protein 40 OS=Mus musculus OX=10090 GN=Chchd4 PE=1 SV=1)	PF06747.13(CHCH:CHCH domain)
Pig.19823.1	Pig.19823	SEL1L3-201	LOW QUALITY PROTEIN: protein sel-1 homolog 3 [Sus scrofa]	0.72	1.26	1.16	0.67	0.5	0.27	3.89	3.77	4.97	GO:0016021(cellular_component:integral component of membrane)				COG0790(S:Function unknown)	XP_020956738.1(LOW QUALITY PROTEIN: protein sel-1 homolog 3 [Sus scrofa])	sp|Q68CR1|SE1L3_HUMAN(Protein sel-1 homolog 3 OS=Homo sapiens OX=9606 GN=SEL1L3 PE=1 SV=2)	PF08238.12(Sel1:Sel1 repeat)
Pig.07145.1	Pig.07145	TMEM233	transmembrane protein 233 isoform X2 [Sus scrofa]	0	0	0	0	0	0	0	0.15	0	GO:0016021(cellular_component:integral component of membrane)				ENOG410YZUX(S:Function unknown)	XP_020929217.1(transmembrane protein 233 isoform X2 [Sus scrofa])	sp|B4DJY2|TM233_HUMAN(Transmembrane protein 233 OS=Homo sapiens OX=9606 GN=TMEM233 PE=3 SV=1)	PF04505.12(CD225:Interferon-induced transmembrane protein)
Pig.09203.1	Pig.09203	CCL24	C-C motif chemokine 24 precursor [Sus scrofa]	1.31	1.29	1.67	0.49	1.42	0.25	81.23	101.9	106.3	GO:0070098(biological_process:chemokine-mediated signaling pathway); GO:0008009(molecular_function:chemokine activity); GO:0048245(biological_process:eosinophil chemotaxis); GO:0048247(biological_process:lymphocyte chemotaxis); GO:0048020(molecular_function:CCR chemokine receptor binding); GO:0050729(biological_process:positive regulation of inflammatory response); GO:0043547(biological_process:p…	K21097	CCL24	map04060(Cytokine-cytokine receptor interaction); map04062(Chemokine signaling pathway)	ENOG41119KC(U:Intracellular trafficking, secretion, and vesicular transport)	NP_001154906.1(C-C motif chemokine 24 precursor [Sus scrofa])	sp|Q68Y86|CCL24_CANLF(C-C motif chemokine 24 OS=Canis lupus familiaris OX=9615 GN=CCL24 PE=3 SV=1)	PF00048.20(IL8:Small cytokines (intecrine/chemokine), interleukin-8 like)
Pig.14516.1	Pig.14516	SLC7A9-202	B(0,+)-type amino acid transporter 1 isoform X1 [Sus scrofa]	0.49	0.68	0.72	1.09	1.17	1.43	0	0	0	GO:0022857(molecular_function:transmembrane transporter activity); GO:0016021(cellular_component:integral component of membrane)	K13868	SLC7A9, BAT1	map04974(Protein digestion and absorption)	COG0531(S:Function unknown)	NP_001103641.1(B(0,+)-type amino acid transporter 1 [Sus scrofa])	sp|P82251|BAT1_HUMAN(b(0,+)-type amino acid transporter 1 OS=Homo sapiens OX=9606 GN=SLC7A9 PE=1 SV=1)	PF13520.6(AA_permease_2:Amino acid permease); PF00324.21(AA_permease:Amino acid permease)
Pig.19958.1	Pig.19958	RCE1-202	CAAX prenyl protease 2 isoform X1 [Sus scrofa]	1.52	1.55	1.52	0.86	1.03	0.85	1.23	1.44	1.7	GO:0071586(biological_process:CAAX-box protein processing); GO:0030176(cellular_component:integral component of endoplasmic reticulum membrane); GO:0004222(molecular_function:metalloendopeptidase activity)	K08658	RCE1, FACE2	map00900(Terpenoid backbone biosynthesis)	ENOG410YPVA(O:Posttranslational modification, protein turnover, chaperones)	XP_013842695.1(CAAX prenyl protease 2 isoform X1 [Sus scrofa])	sp|Q9Y256|FACE2_HUMAN(CAAX prenyl protease 2 OS=Homo sapiens OX=9606 GN=RCE1 PE=1 SV=1)	PF02517.16(CPBP:CPBP intramembrane metalloprotease)
Pig.23847.1	Pig.23847	LOC102723407	T cell receptor alpha chain, partial [Sus scrofa]	0	0	0	0.16	0.14	0	0.11	0	0					ENOG4111BVQ(S:Function unknown); ENOG4111C8C(S:Function unknown)	BAC66581.1(T cell receptor alpha chain, partial [Sus scrofa])	sp|A0A0B4J271|TVAL3_HUMAN(T cell receptor alpha variable 12-3 OS=Homo sapiens OX=9606 GN=TRAV12-3 PE=1 SV=1)	PF07686.17(V-set:Immunoglobulin V-set domain); PF07679.16(I-set:Immunoglobulin I-set domain); PF13927.6(Ig_3:Immunoglobulin domain); PF00047.25(ig:Immunoglobulin domain)
Pig.18350.1	Pig.18350	ENSA-203	alpha-endosulfine [Sus scrofa]	87.75	106.84	104.12	54.62	60.73	64.78	79.95	111.42	107.95	GO:0005737(cellular_component:cytoplasm); GO:0051721(molecular_function:protein phosphatase 2A binding); GO:0019212(molecular_function:phosphatase inhibitor activity); GO:0000278(biological_process:mitotic cell cycle); GO:0035308(biological_process:negative regulation of protein dephosphorylation); GO:0019888(molecular_function:protein phosphatase regulator activity); GO:0019870(molecular_functio…					NP_999339.2(alpha-endosulfine [Sus scrofa])	sp|O43768|ENSA_HUMAN(Alpha-endosulfine OS=Homo sapiens OX=9606 GN=ENSA PE=1 SV=1)	PF04667.17(Endosulfine:cAMP-regulated phosphoprotein/endosulfine conserved region)
Pig.19576.1	Pig.19576	ECI2-201	enoyl-CoA delta isomerase 2, mitochondrial [Sus scrofa]	118.22	116.44	102.63	72.92	74.63	81.03	50.27	60.05	71.17	GO:0016853(molecular_function:isomerase activity); GO:0005777(cellular_component:peroxisome); GO:0005739(cellular_component:mitochondrion); GO:0005654(cellular_component:nucleoplasm); GO:0003824(molecular_function:catalytic activity); GO:0000062(molecular_function:fatty-acyl-CoA binding); GO:0005102(molecular_function:receptor binding)	K13239	ECI2, PECI	map04146(Peroxisome); map00071(Fatty acid degradation)	COG1024(O:Posttranslational modification, protein turnover, chaperones); COG4281(O:Posttranslational modification, protein turnover, chaperones)	NP_001106914.1(enoyl-CoA delta isomerase 2, mitochondrial [Sus scrofa])	sp|O75521|ECI2_HUMAN(Enoyl-CoA delta isomerase 2, mitochondrial OS=Homo sapiens OX=9606 GN=ECI2 PE=1 SV=4)	PF00378.20(ECH_1:Enoyl-CoA hydratase/isomerase); PF00887.19(ACBP:Acyl CoA binding protein); PF16113.5(ECH_2:Enoyl-CoA hydratase/isomerase)
Pig.13153.1	Pig.13153	Ccdc30	coiled-coil domain-containing protein 30-like [Sus scrofa]	0	0	0	0	0	0	0	0	0					ENOG41115HA(S:Function unknown)	XP_020936916.1(coiled-coil domain-containing protein 30-like [Sus scrofa])	sp|Q5VVM6|CCD30_HUMAN(Coiled-coil domain-containing protein 30 OS=Homo sapiens OX=9606 GN=CCDC30 PE=2 SV=1)	PF15742.5(DUF4686:Domain of unknown function (DUF4686))
Pig.21806.1	Pig.21806	FAM240B-201	PREDICTED: uncharacterized protein LOC109493788 [Felis catus]	0.97	0	0.47	0.3	1.08	0.31	0	0	0.47	GO:0008234(molecular_function:cysteine-type peptidase activity)				ENOG411173N(S:Function unknown)	XP_027406094.1(protein FAM240B-like [Bos indicus x Bos taurus])	sp|A0A1B0GVZ2|F240B_HUMAN(Protein FAM240B OS=Homo sapiens OX=9606 GN=FAM240B PE=4 SV=1)
Pig.16144.1	Pig.16144	ZFP36-201	tristetraprolin [Sus scrofa]	166.09	116.08	110.74	13.03	11.94	18.69	311.77	297.72	138.71	GO:0071222(biological_process:cellular response to lipopolysaccharide); GO:1904246(biological_process:negative regulation of polynucleotide adenylyltransferase activity); GO:0038066(biological_process:p38MAPK cascade); GO:0009611(biological_process:response to wounding); GO:0030014(cellular_component:CCR4-NOT complex); GO:0050728(biological_process:negative regulation of inflammatory response); G…	K15308	TTP	map05166(Human T-cell leukemia virus 1 infection); map05167(Kaposi sarcoma-associated herpesvirus infection)	COG5063(S:Function unknown)	NP_001161891.1(tristetraprolin [Sus scrofa])	sp|Q6S9E0|TTP_SHEEP(mRNA decay activator protein ZFP36 OS=Ovis aries OX=9940 GN=ZFP36 PE=2 SV=1)	PF00642.24(zf-CCCH:Zinc finger C-x8-C-x5-C-x3-H type (and similar)); PF18345.1(zf_CCCH_4:Zinc finger domain); PF18044.1(zf-CCCH_4:CCCH-type zinc finger); PF14608.6(zf-CCCH_2:RNA-binding, Nab2-type zinc finger)
Pig.23183.1	Pig.23183	Cdk20	LOW QUALITY PROTEIN: cyclin-dependent kinase 20-like [Sus scrofa]	0	0	0	0	0	0.04	0	0.3	0	GO:0006468(biological_process:protein phosphorylation); GO:0005634(cellular_component:nucleus); GO:0005654(cellular_component:nucleoplasm); GO:0004674(molecular_function:protein serine/threonine kinase activity); GO:0004693(molecular_function:cyclin-dependent protein serine/threonine kinase activity); GO:0005524(molecular_function:ATP binding)	K08817	CCRK		ENOG410XQDH(T:Signal transduction mechanisms)	XP_013840138.2(LOW QUALITY PROTEIN: cyclin-dependent kinase 20-like [Sus scrofa])	sp|Q9JHU3|CDK20_MOUSE(Cyclin-dependent kinase 20 OS=Mus musculus OX=10090 GN=Cdk20 PE=1 SV=1)	PF00069.25(Pkinase:Protein kinase domain); PF07714.17(Pkinase_Tyr:Protein tyrosine kinase)
Pig.15113.1	Pig.15113	RRP1-201	ribosomal RNA processing protein 1 homolog A isoform X1 [Sus scrofa]	2.16	3.67	2.78	2.2	1.89	1.74	5.11	6.44	6.6	GO:0005634(cellular_component:nucleus); GO:0030688(cellular_component:preribosome, small subunit precursor); GO:0030687(cellular_component:preribosome, large subunit precursor); GO:0006364(biological_process:rRNA processing); GO:0005730(cellular_component:nucleolus)	K14849	RRP1		ENOG4111GJ6(H:Coenzyme transport and metabolism)	XP_020926735.1(ribosomal RNA processing protein 1 homolog A isoform X1 [Sus scrofa])	sp|P56182|RRP1_HUMAN(Ribosomal RNA processing protein 1 homolog A OS=Homo sapiens OX=9606 GN=RRP1 PE=1 SV=1)	PF05997.12(Nop52:Nucleolar protein,Nop52)
Pig.19220.1	Pig.19220	PCNX3-201	pecanex-like protein 3 isoform X7 [Sus scrofa]	3.52	3.55	3.89	2.1	1.98	2.01	10.23	12.08	9.52					ENOG410XPRI(S:Function unknown)	XP_020938491.1(pecanex-like protein 3 isoform X7 [Sus scrofa])	sp|Q9H6A9|PCX3_HUMAN(Pecanex-like protein 3 OS=Homo sapiens OX=9606 GN=PCNX3 PE=1 SV=2)	PF05041.15(Pecanex_C:Pecanex protein (C-terminus))
Pig.17650.1	Pig.17650	FAM136A	protein FAM136A [Sus scrofa]	0.26	0.08	0.17	0	0.31	0.06	0.08	0.11	0.09					ENOG4111PBH(S:Function unknown)	XP_027410752.1(protein FAM136A [Bos indicus x Bos taurus])	sp|Q96C01|F136A_HUMAN(Protein FAM136A OS=Homo sapiens OX=9606 GN=FAM136A PE=1 SV=1)	PF05811.13(DUF842:Eukaryotic protein of unknown function (DUF842))
Pig.08440.1	Pig.08440	PSMA6-203	proteasome subunit alpha type-6 [Rattus norvegicus]	44.35	44.03	57.07	41.01	28.21	30.94	51.61	54.16	61.78	GO:0004175(molecular_function:endopeptidase activity); GO:0019773(cellular_component:proteasome core complex, alpha-subunit complex); GO:0030016(cellular_component:myofibril); GO:0030017(cellular_component:sarcomere); GO:0005844(cellular_component:polysome); GO:0005737(cellular_component:cytoplasm); GO:0005839(cellular_component:proteasome core complex); GO:0043161(biological_process:proteasome-m…	K02730	PSMA6	map03050(Proteasome)	ENOG410XR7X(O:Posttranslational modification, protein turnover, chaperones)	XP_003924255.1(PREDICTED: proteasome subunit alpha type-6 [Saimiri boliviensis boliviensis])	sp|Q2YDE4|PSA6_BOVIN(Proteasome subunit alpha type-6 OS=Bos taurus OX=9913 GN=PSMA6 PE=1 SV=1)	PF00227.26(Proteasome:Proteasome subunit); PF10584.9(Proteasome_A_N:Proteasome subunit A N-terminal signature)
Pig.18366.1	Pig.18366	MTMR11-201	myotubularin-related protein 11 [Sus scrofa]	0.05	0.08	0.23	0.07	0.04	0.1	0.33	0.55	0.81		K18085	MTMR10_11_12		ENOG410XPTU(O:Posttranslational modification, protein turnover, chaperones)	NP_001230375.1(myotubularin-related protein 11 [Sus scrofa])	sp|A4FU01|MTMRB_HUMAN(Myotubularin-related protein 11 OS=Homo sapiens OX=9606 GN=MTMR11 PE=2 SV=2)	PF06602.14(Myotub-related:Myotubularin-like phosphatase domain); PF12578.8(3-PAP:Myotubularin-associated protein)
MSTRG.9661.1	MSTRG.9661			112.65	40.01	101.01	87.12	54.38	62.83	47.34	166.06	74.52	GO:0003964(molecular_function:RNA-directed DNA polymerase activity); GO:0004519(molecular_function:endonuclease activity)				ENOG410Y65V(S:Function unknown); ENOG4111K5V(S:Function unknown)	ABR01162.1(endonuclease/reverse transcriptase [Sus scrofa])	sp|P08548|LIN1_NYCCO(LINE-1 reverse transcriptase homolog OS=Nycticebus coucang OX=9470 PE=4 SV=1)	PF00078.27(RVT_1:Reverse transcriptase (RNA-dependent DNA polymerase))
MSTRG.35044.1	MSTRG.35044			241.27	217.08	186.53	167.31	133.29	129.42	419.79	550.67	610.42	GO:0034101(biological_process:erythrocyte homeostasis); GO:0000184(biological_process:nuclear-transcribed mRNA catabolic process, nonsense-mediated decay); GO:0022627(cellular_component:cytosolic small ribosomal subunit); GO:0042274(biological_process:ribosomal small subunit biogenesis); GO:0005829(cellular_component:cytosol); GO:0019083(biological_process:viral transcription); GO:0006614(biologi…	K02974	RP-S24e, RPS24	map03010(Ribosome)	COG2004(J:Translation, ribosomal structure and biogenesis)	XP_017204178.1(PREDICTED: 40S ribosomal protein S24 isoform X1 [Oryctolagus cuniculus])	sp|Q56JU9|RS24_BOVIN(40S ribosomal protein S24 OS=Bos taurus OX=9913 GN=RPS24 PE=2 SV=2)	PF01282.19(Ribosomal_S24e:Ribosomal protein S24e)
MSTRG.35044.2	MSTRG.35044			865.27	889.89	516.9	515.15	479.31	516.35	17.73	42.03	53.99	GO:0003735(molecular_function:structural constituent of ribosome); GO:0006412(biological_process:translation); GO:0005840(cellular_component:ribosome)	K02974	RP-S24e, RPS24	map03010(Ribosome)	COG2004(J:Translation, ribosomal structure and biogenesis)	XP_017204178.1(PREDICTED: 40S ribosomal protein S24 isoform X1 [Oryctolagus cuniculus])	sp|Q56JU9|RS24_BOVIN(40S ribosomal protein S24 OS=Bos taurus OX=9913 GN=RPS24 PE=2 SV=2)	PF01282.19(Ribosomal_S24e:Ribosomal protein S24e)
MSTRG.35044.3	MSTRG.35044			2.79	1.41	2.99	1.53	2.65	2.93	3.49	5.92	10.11	GO:0034101(biological_process:erythrocyte homeostasis); GO:0000184(biological_process:nuclear-transcribed mRNA catabolic process, nonsense-mediated decay); GO:0022627(cellular_component:cytosolic small ribosomal subunit); GO:0042274(biological_process:ribosomal small subunit biogenesis); GO:0005829(cellular_component:cytosol); GO:0019083(biological_process:viral transcription); GO:0006614(biologi…	K02974	RP-S24e, RPS24	map03010(Ribosome)	COG2004(J:Translation, ribosomal structure and biogenesis)	XP_017204178.1(PREDICTED: 40S ribosomal protein S24 isoform X1 [Oryctolagus cuniculus])	sp|P62847|RS24_HUMAN(40S ribosomal protein S24 OS=Homo sapiens OX=9606 GN=RPS24 PE=1 SV=1)	PF01282.19(Ribosomal_S24e:Ribosomal protein S24e)
Pig.09657.1	Pig.09657	PLG-202	plasminogen precursor [Sus scrofa]	468.72	477.11	546.63	156.15	141.12	175.19	0.21	0.27	0.09	GO:0004252(molecular_function:serine-type endopeptidase activity); GO:0042730(biological_process:fibrinolysis); GO:0052213(biological_process:interaction with symbiont via secreted substance involved in symbiotic interaction); GO:0007596(biological_process:blood coagulation); GO:0048771(biological_process:tissue remodeling); GO:0005576(cellular_component:extracellular region)	K01315	PLG	map04080(Neuroactive ligand-receptor interaction); map05150(Staphylococcus aureus infection); map05164(Influenza A); map04610(Complement and coagulation cascades)	COG5640(G:Carbohydrate transport and metabolism)	NP_001038055.1(plasminogen precursor [Sus scrofa])	sp|P06867|PLMN_PIG(Plasminogen OS=Sus scrofa OX=9823 GN=PLG PE=1 SV=3)	PF00051.18(Kringle:Kringle domain); PF00089.26(Trypsin:Trypsin); PF13365.6(Trypsin_2:Trypsin-like peptidase domain); PF00024.26(PAN_1:PAN domain); PF09342.11(DUF1986:Domain of unknown function (DUF1986))
MSTRG.11909.2	MSTRG.11909			0.36	0.47	0.5	0.83	0.33	0.47	0.06	0.03	0.08	GO:0051452(biological_process:intracellular pH reduction); GO:0016021(cellular_component:integral component of membrane); GO:0032580(cellular_component:Golgi cisterna membrane); GO:0008308(molecular_function:voltage-gated anion channel activity); GO:0043588(biological_process:skin development)				ENOG410XQ8R(U:Intracellular trafficking, secretion, and vesicular transport)	XP_003481521.3(Golgi pH regulator [Sus scrofa])	sp|Q5BIM9|GPHR_BOVIN(Golgi pH regulator OS=Bos taurus OX=9913 GN=GPR89A PE=2 SV=2)	PF12430.8(ABA_GPCR:Abscisic acid G-protein coupled receptor); PF12537.8(GPHR_N:The Golgi pH Regulator (GPHR) Family N-terminal)
Pig.02855.1	Pig.02855	GRAMD2A	GRAM domain containing 2-like isoform X3 [Sus scrofa]	0.04	0.04	0.13	0	0	0.06	0.08	0.05	0	GO:0016021(cellular_component:integral component of membrane)				ENOG4111H65(S:Function unknown); ENOG410YC11(S:Function unknown)	XP_020934654.1(GRAM domain containing 2-like isoform X3 [Sus scrofa])	sp|Q8IUY3|GRM2A_HUMAN(GRAM domain-containing protein 2A OS=Homo sapiens OX=9606 GN=GRAMD2A PE=1 SV=2)	PF02893.20(GRAM:GRAM domain)
Pig.16364.1	Pig.16364	KCNIP2-201	PREDICTED: Kv channel-interacting protein 2 isoform X2 [Ovis aries]	0	0.13	0.07	0.27	0	0.22	0.99	1.13	0.86	GO:0005509(molecular_function:calcium ion binding)				COG5126(S:Function unknown)	XP_004020182.1(Kv channel-interacting protein 2 isoform X6 [Ovis aries])	sp|Q8WN03|KCIP2_MUSPF(Kv channel-interacting protein 2 OS=Mustela putorius furo OX=9669 GN=Kcnip2 PE=2 SV=1)	PF13499.6(EF-hand_7:EF-hand domain pair); PF00036.32(EF-hand_1:EF hand); PF13405.6(EF-hand_6:EF-hand domain); PF13202.6(EF-hand_5:EF hand); PF13833.6(EF-hand_8:EF-hand domain pair); PF10591.9(SPARC_Ca_bdg:Secreted protein acidic and rich in cysteine Ca binding region); PF12763.7(EF-hand_4:Cytoskeletal-regulatory complex EF hand)
Pig.23584.1	Pig.23584	GPATCH1-201	G patch domain-containing protein 1 isoform X2 [Sus scrofa]	3.58	3.08	4.27	1.41	1.68	2.47	2.83	5.24	2.19	GO:0003723(molecular_function:RNA binding); GO:0006397(biological_process:mRNA processing)	K13123	GPATCH1		ENOG410Y3I1(S:Function unknown)	XP_020949947.1(G patch domain-containing protein 1 isoform X1 [Sus scrofa])	sp|Q9BRR8|GPTC1_HUMAN(G patch domain-containing protein 1 OS=Homo sapiens OX=9606 GN=GPATCH1 PE=1 SV=1)
Pig.03170.1	Pig.03170	STPG1-201	O(6)-methylguanine-induced apoptosis 2 isoform X4 [Sus scrofa]	0.18	0.11	0.11	0.16	0.2	0.1	0.07	0	0.15	GO:0005737(cellular_component:cytoplasm); GO:1902110(biological_process:positive regulation of mitochondrial membrane permeability involved in apoptotic process); GO:0090073(biological_process:positive regulation of protein homodimerization activity); GO:0005634(cellular_component:nucleus); GO:0006915(biological_process:apoptotic process); GO:0005739(cellular_component:mitochondrion); GO:0043065(…				ENOG4111MU0(S:Function unknown)	XP_020951207.1(O(6)-methylguanine-induced apoptosis 2 isoform X4 [Sus scrofa])	sp|A6QQ60|STPG1_BOVIN(O(6)-methylguanine-induced apoptosis 2 OS=Bos taurus OX=9913 GN=STPG1 PE=2 SV=1)	PF07004.12(SHIPPO-rpt:Sperm-tail PG-rich repeat)
Pig.09647.1	Pig.09647	WTAP	pre-mRNA-splicing regulator WTAP isoform X1 [Sus scrofa]	22.05	23.92	22.55	10.8	7.9	9.77	19.81	29.96	25.1	GO:0005634(cellular_component:nucleus); GO:0000381(biological_process:regulation of alternative mRNA splicing, via spliceosome); GO:0080009(biological_process:mRNA methylation)				ENOG410XNW7(S:Function unknown)	XP_005659171.1(pre-mRNA-splicing regulator WTAP isoform X1 [Sus scrofa])	sp|Q9ER69|FL2D_MOUSE(Pre-mRNA-splicing regulator WTAP OS=Mus musculus OX=10090 GN=Wtap PE=1 SV=3)	PF17098.5(Wtap:WTAP/Mum2p family)
Pig.00343.1	Pig.00343	RUNDC3B-202	RUN domain-containing protein 3B isoform X1 [Sus scrofa]	0.03	0.05	0.05	0.11	0.18	0	0.64	0.5	0.83					ENOG410XRAX(V:Defense mechanisms)	XP_020958176.1(RUN domain-containing protein 3B isoform X1 [Sus scrofa])	sp|Q96NL0|RUN3B_HUMAN(RUN domain-containing protein 3B OS=Homo sapiens OX=9606 GN=RUNDC3B PE=2 SV=1)	PF02759.19(RUN:RUN domain)
Pig.11895.1	Pig.11895	Cdk5rap1	CDK5 regulatory subunit-associated protein 1 isoform X1 [Sus scrofa]	2.01	2.43	2.35	2.31	1.35	1.74	3.59	3.32	3.91	GO:0006400(biological_process:tRNA modification); GO:0016740(molecular_function:transferase activity); GO:0051539(molecular_function:4 iron, 4 sulfur cluster binding)				COG0621(J:Translation, ribosomal structure and biogenesis)	XP_001928891.2(CDK5 regulatory subunit-associated protein 1 isoform X1 [Sus scrofa])	sp|Q96SZ6|CK5P1_HUMAN(CDK5 regulatory subunit-associated protein 1 OS=Homo sapiens OX=9606 GN=CDK5RAP1 PE=1 SV=2)	PF00919.20(UPF0004:Uncharacterized protein family UPF0004); PF04055.21(Radical_SAM:Radical SAM superfamily); PF01938.20(TRAM:TRAM domain)
Pig.00587.1	Pig.00587	PYURF	protein preY, mitochondrial [Sus scrofa]	28.63	33.56	30.26	20.75	22.44	26	40.89	47.83	42.32	GO:0009893(biological_process:positive regulation of metabolic process); GO:0005829(cellular_component:cytosol); GO:0005739(cellular_component:mitochondrion); GO:0005789(cellular_component:endoplasmic reticulum membrane); GO:0006506(biological_process:GPI anchor biosynthetic process); GO:0000506(cellular_component:glycosylphosphatidylinositol-N-acetylglucosaminyltransferase (GPI-GnT) complex)				ENOG41124MY(S:Function unknown)	NP_001258897.1(protein preY, mitochondrial [Sus scrofa])	sp|Q2T9V7|PREY_BOVIN(Protein preY, mitochondrial OS=Bos taurus OX=9913 GN=PREY PE=3 SV=1)	PF03966.16(Trm112p:Trm112p-like protein)
Pig.01902.1	Pig.01902	CNNM1-201	metal transporter CNNM1 isoform X2 [Sus scrofa]	0.06	0	0.14	0.03	0.14	0.25	0	0.03	0.06	GO:0016021(cellular_component:integral component of membrane); GO:0043025(cellular_component:neuronal cell body); GO:0022857(molecular_function:transmembrane transporter activity); GO:0030425(cellular_component:dendrite); GO:0005886(cellular_component:plasma membrane)	K16302	CNNM		COG1253(P:Inorganic ion transport and metabolism)	XP_005671437.1(metal transporter CNNM1 isoform X2 [Sus scrofa])	sp|Q9NRU3|CNNM1_HUMAN(Metal transporter CNNM1 OS=Homo sapiens OX=9606 GN=CNNM1 PE=1 SV=3)	PF01595.20(DUF21:Cyclin M transmembrane N-terminal domain); PF00571.28(CBS:CBS domain)
Pig.12324.1	Pig.12324	DIRAS1-201	zinc transporter ZIP3 [Sus scrofa]	1.36	1.68	1.76	1.33	0.85	1.08	1.94	2.79	1.77	GO:0001701(biological_process:in utero embryonic development); GO:0048701(biological_process:embryonic cranial skeleton morphogenesis); GO:0000902(biological_process:cell morphogenesis); GO:0016021(cellular_component:integral component of membrane); GO:0060173(biological_process:limb development); GO:0043029(biological_process:T cell homeostasis); GO:0071577(biological_process:zinc II ion transme…	K14709	SLC39A1_2_3, ZIP1_2_3		ENOG4111GP2(O:Posttranslational modification, protein turnover, chaperones)	XP_003123074.1(zinc transporter ZIP3 [Sus scrofa])	sp|Q5E960|S39A3_BOVIN(Zinc transporter ZIP3 OS=Bos taurus OX=9913 GN=SLC39A3 PE=2 SV=1)	PF02535.22(Zip:ZIP Zinc transporter)
Pig.22517.1	Pig.22517	Cldn34-ps	claudin-34-like [Sus scrofa]	0	0	0	0	0.01	0.08	0	0	0	GO:0016021(cellular_component:integral component of membrane); GO:0005923(cellular_component:bicellular tight junction); GO:0005198(molecular_function:structural molecule activity)				ENOG4111PMW(S:Function unknown)	XP_020937486.1(claudin-34 [Sus scrofa])	sp|H7C241|CLD34_HUMAN(Claudin-34 OS=Homo sapiens OX=9606 GN=CLDN34 PE=3 SV=2)	PF13903.6(Claudin_2:PMP-22/EMP/MP20/Claudin tight junction)
Pig.16510.1	Pig.16510	PLAU-201	NR:NA	2.34	2.63	3.51	1.47	0.93	0.8	6.55	9.06	11.95	GO:0004252(molecular_function:serine-type endopeptidase activity); GO:0042730(biological_process:fibrinolysis); GO:0005615(cellular_component:extracellular space); GO:0016301(molecular_function:kinase activity); GO:0031639(biological_process:plasminogen activation); GO:0033628(biological_process:regulation of cell adhesion mediated by integrin); GO:0005576(cellular_component:extracellular region)…	K01348	PLAU	map05215(Prostate cancer); map05205(Proteoglycans in cancer); map05202(Transcriptional misregulation in cancer); map05206(MicroRNAs in cancer); map04064(NF-kappa B signaling pathway); map04610(Complement and coagulation cascades)	COG5640(S:Function unknown)	P04185.1(RecName: Full=Urokinase-type plasminogen activator; Short=U-plasminogen activator; Short=uPA; Contains: RecName: Full=Urokinase-type plasminogen activator long chain A; Contains: RecName: Full=Urokinase-type plasminogen activator short chain A; Contains: RecName: Full=Urokinase-type plasminogen activator chain B; Flags: Precursor)	sp|P04185|UROK_PIG(Urokinase-type plasminogen activator OS=Sus scrofa OX=9823 GN=PLAU PE=2 SV=1)	PF00089.26(Trypsin:Trypsin); PF00051.18(Kringle:Kringle domain); PF13365.6(Trypsin_2:Trypsin-like peptidase domain)
MSTRG.26492.1	MSTRG.26492			0.01	0.06	0.05	0.03	0.03	0.02	0.01	0.03	0.01	GO:0003964(molecular_function:RNA-directed DNA polymerase activity)				ENOG4111K5V(S:Function unknown); ENOG41120A8(S:Function unknown); ENOG4112A03(S:Function unknown); ENOG410YGF6(S:Function unknown)	ELR45185.1(hypothetical protein M91_00772 [Bos mutus])	sp|O00370|LORF2_HUMAN(LINE-1 retrotransposable element ORF2 protein OS=Homo sapiens OX=9606 PE=1 SV=1)	PF17490.2(Tnp_22_dsRBD:L1 transposable element dsRBD-like domain); PF02994.14(Transposase_22:L1 transposable element RBD-like domain); PF17489.2(Tnp_22_trimer:L1 transposable element trimerization domain)
MSTRG.17277.2	MSTRG.17277			0.12	0.15	0.14	0.3	0.3	0.34	0.13	0.25	0.21					ENOG41124G6(S:Function unknown)	XP_027473143.1(putative uncharacterized protein C19orf81 homolog [Zalophus californianus])	sp|D3Z070|CS081_MOUSE(Putative uncharacterized protein C19orf81 homolog OS=Mus musculus OX=10090 PE=2 SV=2)
Pig.13361.1	Pig.13361	GFRAL-201	GDNF family receptor alpha-like [Sus scrofa]	0	0	0	0	0	0	0	0	0	GO:0016021(cellular_component:integral component of membrane); GO:0038023(molecular_function:signaling receptor activity)				ENOG4111VG4(U:Intracellular trafficking, secretion, and vesicular transport)	XP_020954171.1(GDNF family receptor alpha-like [Sus scrofa])	sp|Q6UXV0|GFRAL_HUMAN(GDNF family receptor alpha-like OS=Homo sapiens OX=9606 GN=GFRAL PE=1 SV=2)	PF02351.16(GDNF:GDNF/GAS1 domain)
Pig.18719.1	Pig.18719	SPSB2-202	SPRY domain-containing SOCS box protein 2 [Sus scrofa]	3.74	7.23	4.83	2.76	2.28	2.95	1.31	1.63	2.83	GO:0043161(biological_process:proteasome-mediated ubiquitin-dependent protein catabolic process); GO:0043687(biological_process:post-translational protein modification); GO:0016567(biological_process:protein ubiquitination); GO:0006511(biological_process:ubiquitin-dependent protein catabolic process); GO:0019005(cellular_component:SCF ubiquitin ligase complex); GO:0035556(biological_process:intra…	K10344	SPSB2, SSB2		ENOG410XQC1(S:Function unknown)	NP_001230244.1(SPRY domain-containing SOCS box protein 2 [Sus scrofa])	sp|Q99619|SPSB2_HUMAN(SPRY domain-containing SOCS box protein 2 OS=Homo sapiens OX=9606 GN=SPSB2 PE=1 SV=1)	PF00622.28(SPRY:SPRY domain); PF07525.16(SOCS_box:SOCS box)
Pig.14752.1	Pig.14752	DDB1-201	DNA damage-binding protein 1 [Bos mutus]	40.98	44.82	42.35	18.65	17.72	20.12	96.88	125.87	111.07	GO:0035518(biological_process:histone H2A monoubiquitination); GO:1902188(biological_process:positive regulation of viral release from host cell); GO:0070914(biological_process:UV-damage excision repair); GO:0044877(molecular_function:macromolecular complex binding); GO:1901990(biological_process:regulation of mitotic cell cycle phase transition); GO:0003676(molecular_function:nucleic acid bindin…	K10610	DDB1	map04120(Ubiquitin mediated proteolysis); map05203(Viral carcinogenesis); map03420(Nucleotide excision repair); map05161(Hepatitis B)	ENOG410XPF6(L:Replication, recombination and repair)	ELR46310.1(DNA damage-binding protein 1 [Bos mutus])	sp|A1A4K3|DDB1_BOVIN(DNA damage-binding protein 1 OS=Bos taurus OX=9913 GN=DDB1 PE=1 SV=1)	PF10433.9(MMS1_N:Mono-functional DNA-alkylating methyl methanesulfonate N-term); PF03178.15(CPSF_A:CPSF A subunit region)
Pig.03065.1	Pig.03065	ADGRB2-202	adhesion G protein-coupled receptor B2 isoform X1 [Sus scrofa]	0	0.03	0.04	0	0	0.01	1.08	1.76	0.5	GO:0004930(molecular_function:G-protein coupled receptor activity); GO:0007166(biological_process:cell surface receptor signaling pathway); GO:0007422(biological_process:peripheral nervous system development); GO:0005813(cellular_component:centrosome); GO:0016021(cellular_component:integral component of membrane); GO:0051965(biological_process:positive regulation of synapse assembly); GO:0005886(…	K04597	ADGRB2, BAI2		ENOG4111FBM(U:Intracellular trafficking, secretion, and vesicular transport)	XP_013854551.2(adhesion G protein-coupled receptor B2 isoform X1 [Sus scrofa])	sp|O60241|AGRB2_HUMAN(Adhesion G protein-coupled receptor B2 OS=Homo sapiens OX=9606 GN=ADGRB2 PE=1 SV=2)	PF00002.24(7tm_2:7 transmembrane receptor (Secretin family)); PF00090.19(TSP_1:Thrombospondin type 1 domain); PF16489.5(GAIN:GPCR-Autoproteolysis INducing (GAIN) domain); PF01825.21(GPS:GPCR proteolysis site, GPS, motif)
Pig.00597.1	Pig.00597	GRID2-201	PREDICTED: glutamate receptor ionotropic, delta-2 isoform X1 [Ovis aries]	0	0	0	0	0.02	0	0.24	0.3	0.55	GO:0005887(cellular_component:integral component of plasma membrane); GO:0005886(cellular_component:plasma membrane); GO:0050804(biological_process:modulation of synaptic transmission); GO:0008066(molecular_function:glutamate receptor activity); GO:1900454(biological_process:positive regulation of long term synaptic depression); GO:0045202(cellular_component:synapse); GO:0060134(biological_proces…	K05207	GRID2	map04080(Neuroactive ligand-receptor interaction); map04730(Long-term depression)	ENOG410YYDD(U:Intracellular trafficking, secretion, and vesicular transport)	XP_004009752.1(glutamate receptor ionotropic, delta-2 [Ovis aries])	sp|O43424|GRID2_HUMAN(Glutamate receptor ionotropic, delta-2 OS=Homo sapiens OX=9606 GN=GRID2 PE=1 SV=2)	PF01094.28(ANF_receptor:Receptor family ligand binding region); PF00060.26(Lig_chan:Ligand-gated ion channel); PF10613.9(Lig_chan-Glu_bd:Ligated ion channel L-glutamate- and glycine-binding site); PF00497.20(SBP_bac_3:Bacterial extracellular solute-binding proteins, family 3)
MSTRG.39219.1	MSTRG.39219			0.1	0.14	0.05	0.05	0.09	0.12	0.33	0.35	0.31	GO:0045931(biological_process:positive regulation of mitotic cell cycle); GO:0005737(cellular_component:cytoplasm); GO:0006468(biological_process:protein phosphorylation); GO:0003682(molecular_function:chromatin binding); GO:0000775(cellular_component:chromosome, centromeric region); GO:0005813(cellular_component:centrosome); GO:0004725(molecular_function:protein tyrosine phosphatase activity); G…	K11496	CENPB		ENOG4110CDI(S:Function unknown)	XP_013840598.1(M-phase inducer phosphatase 2 isoform X3 [Sus scrofa])	sp|P07199|CENPB_HUMAN(Major centromere autoantigen B OS=Homo sapiens OX=9606 GN=CENPB PE=1 SV=2)	PF06617.13(M-inducer_phosp:M-phase inducer phosphatase); PF09026.10(CENP-B_dimeris:Centromere protein B dimerisation domain); PF03184.19(DDE_1:DDE superfamily endonuclease); PF03221.16(HTH_Tnp_Tc5:Tc5 transposase DNA-binding domain); PF00581.20(Rhodanese:Rhodanese-like domain)
Pig.06356.1	Pig.06356	RPL18A	PREDICTED: 60S ribosomal protein L18a [Canis lupus familiaris]	361.74	440.45	341.6	270.74	298.63	248.24	576.19	766.61	711.63	GO:0016020(cellular_component:membrane); GO:0000184(biological_process:nuclear-transcribed mRNA catabolic process, nonsense-mediated decay); GO:0005840(cellular_component:ribosome); GO:0022625(cellular_component:cytosolic large ribosomal subunit); GO:0005829(cellular_component:cytosol); GO:0019083(biological_process:viral transcription); GO:0006614(biological_process:SRP-dependent cotranslational…	K02882	RP-L18Ae, RPL18A	map03010(Ribosome)	COG2157(J:Translation, ribosomal structure and biogenesis)	XP_533877.1(60S ribosomal protein L18a [Canis lupus familiaris])	sp|Q3T003|RL18A_BOVIN(60S ribosomal protein L18a OS=Bos taurus OX=9913 GN=RPL18A PE=2 SV=1)	PF01775.17(Ribosomal_L18A:Ribosomal proteins 50S-L18Ae/60S-L20/60S-L18A)
Pig.19790.1	Pig.19790	Olfr822	olfactory receptor 6C74-like [Sus scrofa]	0	0	0	0.03	0	0	0	0	0	GO:0004930(molecular_function:G-protein coupled receptor activity); GO:0005886(cellular_component:plasma membrane); GO:0016021(cellular_component:integral component of membrane); GO:0004984(molecular_function:olfactory receptor activity)	K04257	OLFR	map04740(Olfactory transduction)	ENOG41115RP(U:Intracellular trafficking, secretion, and vesicular transport)	XP_003360623.1(olfactory receptor 6C74-like [Sus scrofa])	sp|A6NM76|O6C76_HUMAN(Olfactory receptor 6C76 OS=Homo sapiens OX=9606 GN=OR6C76 PE=3 SV=1)	PF13853.6(7tm_4:Olfactory receptor); PF00001.21(7tm_1:7 transmembrane receptor (rhodopsin family))
Pig.07411.1	Pig.07411	NRL-201	transcription factor MafB [Ictidomys tridecemlineatus]	60.24	62.36	67.56	22.52	21.88	20.03	21.95	26.9	31.8	GO:0043565(molecular_function:sequence-specific DNA binding); GO:0042472(biological_process:inner ear morphogenesis); GO:0005667(cellular_component:transcription factor complex); GO:0033077(biological_process:T cell differentiation in thymus); GO:0003700(molecular_function:transcription factor activity, sequence-specific DNA binding); GO:0021572(biological_process:rhombomere 6 development); GO:00…	K09036	MAFB	map04928(Parathyroid hormone synthesis, secretion and action)	ENOG41102C7(S:Function unknown)	XP_004412027.1(PREDICTED: transcription factor MafB [Odobenus rosmarus divergens])	sp|Q9Y5Q3|MAFB_HUMAN(Transcription factor MafB OS=Homo sapiens OX=9606 GN=MAFB PE=1 SV=2)	PF03131.17(bZIP_Maf:bZIP Maf transcription factor); PF08383.11(Maf_N:Maf N-terminal region); PF14662.6(KASH_CCD:Coiled-coil region of CCDC155 or KASH)
Pig.20457.1	Pig.20457	CAP2-201	adenylyl cyclase-associated protein 2 [Sus scrofa]	0	0.07	0.04	0	0.11	0.08	0.7	0.39	0.42	GO:0003779(molecular_function:actin binding); GO:0014069(cellular_component:postsynaptic density); GO:0007010(biological_process:cytoskeleton organization); GO:0000902(biological_process:cell morphogenesis); GO:0042802(molecular_function:identical protein binding)	K17261	CAP1_2, SRV2		ENOG410XPXJ(U:Intracellular trafficking, secretion, and vesicular transport)	XP_020955873.1(adenylyl cyclase-associated protein 2 [Sus scrofa])	sp|Q5R5X8|CAP2_PONAB(Adenylyl cyclase-associated protein 2 OS=Pongo abelii OX=9601 GN=CAP2 PE=2 SV=1)	PF01213.19(CAP_N:Adenylate cyclase associated (CAP) N terminal)
Pig.19042.1	Pig.19042	CNTD1-201	PREDICTED: cyclin N-terminal domain-containing protein 1 [Physeter catodon]	0	0	0	0	0	0	0	0	0					ENOG410XQWZ(T:Signal transduction mechanisms); ENOG4111VV0(S:Function unknown)	XP_007102172.1(cyclin N-terminal domain-containing protein 1 [Physeter catodon])	sp|Q9D995|CNTD1_MOUSE(Cyclin N-terminal domain-containing protein 1 OS=Mus musculus OX=10090 GN=Cntd1 PE=2 SV=1)	PF00134.23(Cyclin_N:Cyclin, N-terminal domain)
Pig.14338.1	Pig.14338	TMEM62-202	transmembrane protein 62 isoform X1 [Sus scrofa]	3.75	3.93	3.45	2.88	1.97	2.4	3.89	3.65	4.43	GO:0016787(molecular_function:hydrolase activity); GO:0016021(cellular_component:integral component of membrane)				ENOG410XNV4(S:Function unknown)	XP_020952710.1(transmembrane protein 62 isoform X1 [Sus scrofa])	sp|Q8BXJ9|TMM62_MOUSE(Transmembrane protein 62 OS=Mus musculus OX=10090 GN=Tmem62 PE=2 SV=1)	PF00149.28(Metallophos:Calcineurin-like phosphoesterase); PF17957.1(Big_7:Bacterial Ig domain)
MSTRG.14113.1	MSTRG.14113			9.47	3.7	6.05	3.55	2.64	2.7	1.3	2.31	1.57	GO:0003964(molecular_function:RNA-directed DNA polymerase activity); GO:0004519(molecular_function:endonuclease activity)					ABR01162.1(endonuclease/reverse transcriptase [Sus scrofa])	sp|O00370|LORF2_HUMAN(LINE-1 retrotransposable element ORF2 protein OS=Homo sapiens OX=9606 PE=1 SV=1)	PF08333.11(DUF1725:Protein of unknown function (DUF1725))
Pig.18742.1	Pig.18742	RPL24-203	PREDICTED: 60S ribosomal protein L24 [Saimiri boliviensis boliviensis]	0	0	0	0	0	0	0	0	0	GO:0005840(cellular_component:ribosome)	K02896	RP-L24e, RPL24	map03010(Ribosome)	COG2075(J:Translation, ribosomal structure and biogenesis)	XP_010348350.1(PREDICTED: 60S ribosomal protein L24 [Saimiri boliviensis boliviensis])	sp|Q862I1|RL24_BOVIN(60S ribosomal protein L24 OS=Bos taurus OX=9913 GN=RPL24 PE=2 SV=2)	PF01246.20(Ribosomal_L24e:Ribosomal protein L24e)
Pig.12843.1	Pig.12843	VAC14	protein VAC14 homolog [Sus scrofa]	0	0	0	0.08	0.08	0	0.2	0.13	0.11	GO:0006661(biological_process:phosphatidylinositol biosynthetic process); GO:0070772(cellular_component:PAS complex); GO:0010008(cellular_component:endosome membrane)	K15305	VAC14, TAX1BP2	map05166(Human T-cell leukemia virus 1 infection); map05203(Viral carcinogenesis)	ENOG410XP6E(U:Intracellular trafficking, secretion, and vesicular transport)	XP_020953191.1(protein VAC14 homolog [Sus scrofa])	sp|Q08AM6|VAC14_HUMAN(Protein VAC14 homolog OS=Homo sapiens OX=9606 GN=VAC14 PE=1 SV=1)	PF12755.7(Vac14_Fab1_bd:Vacuolar 14 Fab1-binding region); PF02985.22(HEAT:HEAT repeat)
Pig.03812.1	Pig.03812	Rbm3	PREDICTED: RNA-binding protein 3 [Trichechus manatus latirostris]	0	0.11	0	0.16	0.07	0	1.56	2.89	2.6	GO:0003723(molecular_function:RNA binding)	K13186	RBM3		COG0724(S:Function unknown); ENOG41121QZ(S:Function unknown)	XP_007956092.1(PREDICTED: putative RNA-binding protein 3 [Orycteropus afer afer])	sp|W8E7I1|RBM3_CAPHI(RNA-binding protein 3 OS=Capra hircus OX=9925 GN=RBM3 PE=2 SV=2)	PF00076.22(RRM_1:RNA recognition motif. (a.k.a. RRM, RBD, or RNP domain))
Pig.14342.1	Pig.14342	STARD9	LOW QUALITY PROTEIN: stAR-related lipid transfer protein 9 [Sus scrofa]	0.44	0.6	0.66	0.48	0.44	0.59	4.08	5.85	5.37	GO:0008017(molecular_function:microtubule binding); GO:0007018(biological_process:microtubule-based movement); GO:0008289(molecular_function:lipid binding); GO:0005524(molecular_function:ATP binding); GO:0003777(molecular_function:microtubule motor activity)	K16491	STARD9		ENOG410XSPT(S:Function unknown); COG5059(S:Function unknown)	XP_020952823.1(LOW QUALITY PROTEIN: stAR-related lipid transfer protein 9 [Sus scrofa])	sp|Q9P2P6|STAR9_HUMAN(StAR-related lipid transfer protein 9 OS=Homo sapiens OX=9606 GN=STARD9 PE=1 SV=3)	PF01852.19(START:START domain)
Pig.03071.1	Pig.03071	SERINC2-201	serine incorporator 2 isoform X1 [Sus scrofa]	15.3	16.61	11.7	0	0.71	0	47.16	77.71	42.27	GO:0016021(cellular_component:integral component of membrane); GO:0006658(biological_process:phosphatidylserine metabolic process); GO:0006665(biological_process:sphingolipid metabolic process)				ENOG410XP7K(S:Function unknown)	XP_020949052.1(serine incorporator 2 isoform X1 [Sus scrofa])	sp|Q58CW5|SERC2_BOVIN(Serine incorporator 2 OS=Bos taurus OX=9913 GN=SERINC2 PE=2 SV=1)	PF03348.15(Serinc:Serine incorporator (Serinc))
MSTRG.6416.2	MSTRG.6416			0.11	0.14	0.17	0.21	0.13	0.18	0.47	0.64	0.55	GO:0016021(cellular_component:integral component of membrane); GO:0015333(molecular_function:peptide:proton symporter activity); GO:0005765(cellular_component:lysosomal membrane); GO:0022857(molecular_function:transmembrane transporter activity); GO:1904680(molecular_function:peptide transmembrane transporter activity); GO:0035673(molecular_function:oligopeptide transmembrane transporter activity)	K14638	SLC15A3_4, PHT		COG3104(E:Amino acid transport and metabolism)	XP_003122726.3(solute carrier family 15 member 3 [Sus scrofa] >ANM86277.1 solute carrier family 15 member 3 [Sus scrofa])	sp|Q8IY34|S15A3_HUMAN(Solute carrier family 15 member 3 OS=Homo sapiens OX=9606 GN=SLC15A3 PE=1 SV=2)	PF00854.21(PTR2:POT family); PF07690.16(MFS_1:Major Facilitator Superfamily); PF15706.5(TMEM132D_C:Mature oligodendrocyte transmembrane protein, TMEM132D, C-term); PF16070.5(TMEM132:Transmembrane protein family 132)
Pig.19617.1	Pig.19617	RPS19	NR:NA	221.57	255.34	202.8	277.38	231.81	233.24	460.24	532.23	625.83	GO:0009991(biological_process:response to extracellular stimulus); GO:0000184(biological_process:nuclear-transcribed mRNA catabolic process, nonsense-mediated decay); GO:0060265(biological_process:positive regulation of respiratory burst involved in inflammatory response); GO:0060266(biological_process:negative regulation of respiratory burst involved in inflammatory response); GO:0019083(biologi…	K02966	RP-S19e, RPS19	map03010(Ribosome)	COG2238(J:Translation, ribosomal structure and biogenesis)	ELK19630.1(Doublesex- and mab-3-related transcription factor C2 [Pteropus alecto])	sp|Q32PD5|RS19_BOVIN(40S ribosomal protein S19 OS=Bos taurus OX=9913 GN=RPS19 PE=2 SV=3)	PF01090.19(Ribosomal_S19e:Ribosomal protein S19e)
MSTRG.16697.1	MSTRG.16697			19.1	22.68	16.15	15.28	15	14.09	105.72	133.86	138.96	GO:0043005(cellular_component:neuron projection); GO:0016192(biological_process:vesicle-mediated transport); GO:0034446(biological_process:substrate adhesion-dependent cell spreading); GO:0005829(cellular_component:cytosol); GO:0045202(cellular_component:synapse); GO:0042147(biological_process:retrograde transport, endosome to Golgi); GO:0005886(cellular_component:plasma membrane); GO:0015031(bio…	K13505	VAMP3	map04145(Phagosome); map04130(SNARE interactions in vesicular transport)	COG5143(U:Intracellular trafficking, secretion, and vesicular transport)	XP_020950929.1(vesicle-associated membrane protein 3 [Sus scrofa])	sp|Q2KJD2|VAMP3_BOVIN(Vesicle-associated membrane protein 3 OS=Bos taurus OX=9913 GN=VAMP3 PE=3 SV=1)	PF00957.21(Synaptobrevin:Synaptobrevin)
MSTRG.16697.3	MSTRG.16697			0.11	0	0.07	0.15	0.16	0.05	0.35	0.32	0.45	GO:0043005(cellular_component:neuron projection); GO:0016192(biological_process:vesicle-mediated transport); GO:0034446(biological_process:substrate adhesion-dependent cell spreading); GO:0016021(cellular_component:integral component of membrane); GO:0045202(cellular_component:synapse); GO:0042147(biological_process:retrograde transport, endosome to Golgi); GO:0005886(cellular_component:plasma me…	K13504;K13505	VAMP2;VAMP3	map04130(SNARE interactions in vesicular transport); map04970(Salivary secretion); map04962(Vasopressin-regulated water reabsorption); map04911(Insulin secretion); map04145(Phagosome); map04721(Synaptic vesicle cycle)	COG5143(U:Intracellular trafficking, secretion, and vesicular transport)	XP_016010208.1(PREDICTED: vesicle-associated membrane protein 2 isoform X1 [Rousettus aegyptiacus])	sp|Q2KJD2|VAMP3_BOVIN(Vesicle-associated membrane protein 3 OS=Bos taurus OX=9913 GN=VAMP3 PE=3 SV=1)	PF00957.21(Synaptobrevin:Synaptobrevin)
Pig.09465.1	Pig.09465	PDCL3-201	PREDICTED: phosducin-like protein 3 [Ovis aries]	14.48	10.13	10.24	6.35	4.73	5.84	13.63	19.5	16.77	GO:0043184(molecular_function:vascular endothelial growth factor receptor 2 binding); GO:0050730(biological_process:regulation of peptidyl-tyrosine phosphorylation); GO:0005829(cellular_component:cytosol); GO:0044183(molecular_function:protein binding involved in protein folding); GO:2000059(biological_process:negative regulation of protein ubiquitination involved in ubiquitin-dependent protein c…				ENOG4111H24(J:Translation, ribosomal structure and biogenesis)	XP_003124947.3(phosducin-like protein 3 [Sus scrofa])	sp|Q9H2J4|PDCL3_HUMAN(Phosducin-like protein 3 OS=Homo sapiens OX=9606 GN=PDCL3 PE=1 SV=1)	PF02114.16(Phosducin:Phosducin); PF03683.13(UPF0175:Uncharacterised protein family (UPF0175))
Pig.19034.1	Pig.19034	RUNDC1-201	RUN domain-containing protein 1 isoform X2 [Sus scrofa]	3.1	3.4	3.52	1.79	1.37	1.22	7.13	9.26	8.28					ENOG410XQKK(S:Function unknown)	XP_020922626.1(RUN domain-containing protein 1 isoform X2 [Sus scrofa])	sp|Q96C34|RUND1_HUMAN(RUN domain-containing protein 1 OS=Homo sapiens OX=9606 GN=RUNDC1 PE=1 SV=3)	PF02759.19(RUN:RUN domain)
Pig.10842.1	Pig.10842	KMO-202	kynurenine 3-monooxygenase [Sus scrofa]	125.76	112.1	107.76	66.27	52.18	38.41	1.64	1.06	2.23	GO:0050660(molecular_function:flavin adenine dinucleotide binding); GO:0004502(molecular_function:kynurenine 3-monooxygenase activity); GO:0019674(biological_process:NAD metabolic process); GO:0034354(biological_process:'de novo' NAD biosynthetic process from tryptophan); GO:0016021(cellular_component:integral component of membrane); GO:0016174(molecular_function:NAD(P)H oxidase activity); GO:000…	K00486	KMO	map00380(Tryptophan metabolism)	COG0654(C:Energy production and conversion); COG0654(H:Coenzyme transport and metabolism)	NP_999241.1(kynurenine 3-monooxygenase [Sus scrofa])	sp|Q9MZS9|KMO_PIG(Kynurenine 3-monooxygenase OS=Sus scrofa OX=9823 GN=KMO PE=2 SV=2)	PF01494.19(FAD_binding_3:FAD binding domain); PF13450.6(NAD_binding_8:NAD(P)-binding Rossmann-like domain); PF01266.24(DAO:FAD dependent oxidoreductase); PF08491.10(SE:Squalene epoxidase)
Pig.20942.1	Pig.20942	LYNX1-201	ly-6/neurotoxin-like protein 1 [Sus scrofa]	1.8	0.98	0.79	0.13	0.47	0.53	0.76	4.69	2.18	GO:0030550(molecular_function:acetylcholine receptor inhibitor activity); GO:0030548(molecular_function:acetylcholine receptor regulator activity); GO:0005783(cellular_component:endoplasmic reticulum); GO:0016021(cellular_component:integral component of membrane); GO:0033130(molecular_function:acetylcholine receptor binding); GO:0030425(cellular_component:dendrite); GO:0005886(cellular_component:…				ENOG410Z656(O:Posttranslational modification, protein turnover, chaperones)	XP_020944434.1(ly-6/neurotoxin-like protein 1 [Sus scrofa])	sp|Q5IS42|LYNX1_PANTR(Ly-6/neurotoxin-like protein 1 OS=Pan troglodytes OX=9598 GN=LYNX1 PE=3 SV=1)	PF00087.21(Toxin_TOLIP:Snake toxin and toxin-like protein)
MSTRG.21516.2	MSTRG.21516			94.8	97.74	94.66	70.72	73.16	77.23	63.94	76.16	69.38	GO:1900181(biological_process:negative regulation of protein localization to nucleus); GO:0005737(cellular_component:cytoplasm); GO:0050687(biological_process:negative regulation of defense response to virus); GO:0032480(biological_process:negative regulation of type I interferon production); GO:0043392(biological_process:negative regulation of DNA binding); GO:0005634(cellular_component:nucleus)…				ENOG410ZKCZ(S:Function unknown)	XP_002914349.1(PREDICTED: uncharacterized protein C6orf106 homolog isoform X3 [Ailuropoda melanoleuca] >XP_003431755.1 uncharacterized protein C6orf106 homolog isoform X1 [Canis lupus familiaris] >XP_004673460.1 PREDICTED: uncharacterized protein C6orf106 homolog isoform X1 [Condylura cristata] >XP_007106354.1 uncharacterized protein C6orf106 homolog isoform X1 [Physeter catodon] >XP_017518585.1 …	sp|Q3TT38|ILRUN_MOUSE(Protein ILRUN OS=Mus musculus OX=10090 GN=Ilrun PE=2 SV=2)	PF16158.5(N_BRCA1_IG:Ig-like domain from next to BRCA1 gene)
Pig.10943.1	Pig.10943	LOC101151870	PREDICTED: T-cell receptor alpha chain V region HPB-MLT isoform X2 [Bos taurus]	0.1	0	0.11	0.07	0.13	0.07	0.1	0	0					ENOG410YTGF(S:Function unknown)	DAA25684.1(TPA: TRD@ protein-like [Bos taurus])	sp|A0A1B0GX56|TRDV1_HUMAN(T cell receptor delta variable 1 OS=Homo sapiens OX=9606 GN=TRDV1 PE=1 SV=1)	PF07686.17(V-set:Immunoglobulin V-set domain); PF13927.6(Ig_3:Immunoglobulin domain); PF00047.25(ig:Immunoglobulin domain); PF07679.16(I-set:Immunoglobulin I-set domain); PF13895.6(Ig_2:Immunoglobulin domain)
Pig.14709.1	Pig.14709	NR2C2-201	PREDICTED: nuclear receptor subfamily 2 group C member 2 isoform X1 [Odobenus rosmarus divergens]	6.2	7.14	6.99	3.42	2.96	4.31	12.83	19.83	16.37	GO:0043565(molecular_function:sequence-specific DNA binding); GO:0003700(molecular_function:transcription factor activity, sequence-specific DNA binding); GO:0005634(cellular_component:nucleus); GO:0001228(molecular_function:transcriptional activator activity, RNA polymerase II transcription regulatory region sequence-specific binding); GO:0003707(molecular_function:steroid hormone receptor activ…	K08544	NR2C2, TR4		ENOG410XRZC(S:Function unknown)	XP_005669862.1(nuclear receptor subfamily 2 group C member 2 isoform X1 [Sus scrofa])	sp|P49116|NR2C2_HUMAN(Nuclear receptor subfamily 2 group C member 2 OS=Homo sapiens OX=9606 GN=NR2C2 PE=1 SV=1)	PF00104.30(Hormone_recep:Ligand-binding domain of nuclear hormone receptor); PF00105.18(zf-C4:Zinc finger, C4 type (two domains))
Pig.18738.1	Pig.18738	FLVCR1-202	feline leukemia virus subgroup C receptor 2 [Sus scrofa]	0	0	0	0	0	0	0	0	0	GO:0016021(cellular_component:integral component of membrane); GO:0055085(biological_process:transmembrane transport)	K08220	FLVCR, SLC49A1_2		ENOG410XSTK(S:Function unknown)	EPY81345.1(feline leukemia virus subgroup C receptor-related protein 2-like protein [Camelus ferus])	sp|Q9UPI3|FLVC2_HUMAN(Feline leukemia virus subgroup C receptor-related protein 2 OS=Homo sapiens OX=9606 GN=FLVCR2 PE=1 SV=1)	PF17350.2(DUF5379:Family of unknown function (DUF5379))
Pig.06591.1	Pig.06591	1700034J05Rik	uncharacterized protein C12orf71 homolog [Sus scrofa]	0	0	0	0	0	0	0	0	0					ENOG4111CP2(S:Function unknown)	XP_020947809.1(uncharacterized protein C12orf71 homolog [Sus scrofa])	sp|Q32LI3|CL071_BOVIN(Uncharacterized protein C12orf71 homolog OS=Bos taurus OX=9913 PE=2 SV=2)	PF15480.6(DUF4640:Domain of unknown function (DUF4640))
Pig.08077.1	Pig.08077	ANKRD46-201	ankyrin repeat domain-containing protein 46 isoform 1 [Homo sapiens]	14.76	11.13	15.36	11.69	7.06	9.65	12.17	12.69	16.16	GO:0035091(molecular_function:phosphatidylinositol binding); GO:0006886(biological_process:intracellular protein transport); GO:0016021(cellular_component:integral component of membrane); GO:0005623(cellular_component:cell)				COG0666(K:Transcription)	KFO35231.1(Sorting nexin-31 [Fukomys damarensis])	sp|Q3SX00|ANR46_BOVIN(Ankyrin repeat domain-containing protein 46 OS=Bos taurus OX=9913 GN=ANKRD46 PE=2 SV=1)	PF13637.6(Ank_4:Ankyrin repeats (many copies)); PF12796.7(Ank_2:Ankyrin repeats (3 copies)); PF13857.6(Ank_5:Ankyrin repeats (many copies)); PF00023.30(Ank:Ankyrin repeat); PF13606.6(Ank_3:Ankyrin repeat)
Pig.05592.1	Pig.05592	ZNF704-201	zinc finger protein 395 isoform 1 [Sus scrofa]	8.35	11.23	6.73	5.34	8.65	8.93	24.13	33.09	38.87	GO:0003676(molecular_function:nucleic acid binding)				ENOG4111TEU(S:Function unknown)	NP_001231424.1(zinc finger protein 395 isoform 1 [Sus scrofa])	sp|Q9H8N7|ZN395_HUMAN(Zinc finger protein 395 OS=Homo sapiens OX=9606 GN=ZNF395 PE=1 SV=2)	PF15997.5(DUF4772:Domain of unknown function (DUF4772))
Pig.18180.1	Pig.18180	SGCD-201	delta-sarcoglycan [Sus scrofa]	1.56	1.86	2.1	0.47	0.73	0.5	31.07	35.63	32.57	GO:0048738(biological_process:cardiac muscle tissue development); GO:0042383(cellular_component:sarcolemma); GO:0086003(biological_process:cardiac muscle cell contraction); GO:0060047(biological_process:heart contraction); GO:0016021(cellular_component:integral component of membrane); GO:0019722(biological_process:calcium-mediated signaling); GO:0016012(cellular_component:sarcoglycan complex); GO…	K12563	SGCD	map05416(Viral myocarditis); map05414(Dilated cardiomyopathy (DCM)); map05412(Arrhythmogenic right ventricular cardiomyopathy (ARVC)); map05410(Hypertrophic cardiomyopathy (HCM))	ENOG4111GCH(S:Function unknown)	NP_001137595.1(delta-sarcoglycan [Sus scrofa])	sp|Q92629|SGCD_HUMAN(Delta-sarcoglycan OS=Homo sapiens OX=9606 GN=SGCD PE=1 SV=2)	PF04790.13(Sarcoglycan_1:Sarcoglycan complex subunit protein); PF10106.9(DUF2345:Uncharacterized protein conserved in bacteria (DUF2345))
Pig.15142.1	Pig.15142	CYP2J34-210	cytochrome P450 2J2 isoform X1 [Sus scrofa]	3.48	3.01	0.05	0.33	0.6	1.42	0.34	1.83	0.75	GO:0005737(cellular_component:cytoplasm); GO:0020037(molecular_function:heme binding); GO:0006082(biological_process:organic acid metabolic process); GO:0042738(biological_process:exogenous drug catabolic process); GO:0016712(molecular_function:oxidoreductase activity, acting on paired donors, with incorporation or reduction of molecular oxygen, reduced flavin or flavoprotein as one donor, and in…	K07418	CYP2J	map00590(Arachidonic acid metabolism); map00591(Linoleic acid metabolism); map04913(Ovarian steroidogenesis); map04750(Inflammatory mediator regulation of TRP channels); map04726(Serotonergic synapse)	COG2124(Q:Secondary metabolites biosynthesis, transport and catabolism)	XP_003128009.5(cytochrome P450 2J2 isoform X1 [Sus scrofa])	sp|P51589|CP2J2_HUMAN(Cytochrome P450 2J2 OS=Homo sapiens OX=9606 GN=CYP2J2 PE=1 SV=2)	PF00067.22(p450:Cytochrome P450)
Pig.05315.1	Pig.05315	PACRGL-201	PACRG-like protein [Sus scrofa]	0.52	0.06	0.96	0.33	0.07	0.33	0.68	0.95	0.96					ENOG410XSXW(S:Function unknown)	XP_003482400.2(PACRG-like protein [Sus scrofa])	sp|Q8N7B6|PACRL_HUMAN(PACRG-like protein OS=Homo sapiens OX=9606 GN=PACRGL PE=1 SV=2)	PF10274.9(ParcG:Parkin co-regulated protein)
Pig.11387.1	Pig.11387	TRIM10-201	tripartite motif-containing protein 10 [Sus scrofa]	2.65	3.96	2.2	1.16	1.13	2.12	0.02	0	0.03	GO:0008270(molecular_function:zinc ion binding)	K12002	TRIM10		ENOG4111G04(S:Function unknown)	NP_001116679.1(tripartite motif-containing protein 10 [Sus scrofa])	sp|O19085|TRI10_PIG(Tripartite motif-containing protein 10 OS=Sus scrofa OX=9823 GN=TRIM10 PE=3 SV=2)	PF13765.6(PRY:SPRY-associated domain); PF00622.28(SPRY:SPRY domain); PF00097.25(zf-C3HC4:Zinc finger, C3HC4 type (RING finger)); PF00643.24(zf-B_box:B-box zinc finger); PF15227.6(zf-C3HC4_4:zinc finger of C3HC4-type, RING); PF13920.6(zf-C3HC4_3:Zinc finger, C3HC4 type (RING finger)); PF13445.6(zf-RING_UBOX:RING-type zinc-finger); PF13923.6(zf-C3HC4_2:Zinc finger, C3HC4 type (RING finger)); PF1363…
Pig.18200.1	Pig.18200	ADAM8-201	disintegrin and metalloproteinase domain-containing protein 8 [Sus scrofa]	0.35	0.29	0.27	0.15	0.23	0.21	0.46	1.19	1.69	GO:0007229(biological_process:integrin-mediated signaling pathway); GO:0004222(molecular_function:metalloendopeptidase activity); GO:0016021(cellular_component:integral component of membrane)	K06540	ADAM8, CD156a		ENOG410XX2M(K:Transcription)	XP_020929591.1(disintegrin and metalloproteinase domain-containing protein 8 [Sus scrofa])	sp|P78325|ADAM8_HUMAN(Disintegrin and metalloproteinase domain-containing protein 8 OS=Homo sapiens OX=9606 GN=ADAM8 PE=1 SV=2)	PF01421.19(Reprolysin:Reprolysin (M12B) family zinc metalloprotease); PF01562.19(Pep_M12B_propep:Reprolysin family propeptide); PF13688.6(Reprolysin_5:Metallo-peptidase family M12); PF00200.23(Disintegrin:Disintegrin); PF13582.6(Reprolysin_3:Metallo-peptidase family M12B Reprolysin-like); PF13574.6(Reprolysin_2:Metallo-peptidase family M12B Reprolysin-like); PF13583.6(Reprolysin_4:Metallo-peptida…
Pig.09479.1	Pig.09479	PTPRA-205	receptor-type tyrosine-protein phosphatase alpha isoform X2 [Sus scrofa]	11.99	11.93	11.54	5.48	5.57	6.71	29.25	41.27	33.25	GO:0004725(molecular_function:protein tyrosine phosphatase activity); GO:0016021(cellular_component:integral component of membrane)	K18032	PTPRA		COG5599(O:Posttranslational modification, protein turnover, chaperones)	XP_020932895.1(receptor-type tyrosine-protein phosphatase alpha isoform X2 [Sus scrofa])	sp|P18052|PTPRA_MOUSE(Receptor-type tyrosine-protein phosphatase alpha OS=Mus musculus OX=10090 GN=Ptpra PE=1 SV=3)	PF00102.27(Y_phosphatase:Protein-tyrosine phosphatase); PF00782.20(DSPc:Dual specificity phosphatase, catalytic domain); PF13350.6(Y_phosphatase3:Tyrosine phosphatase family)
Pig.20776.1	Pig.20776	CDH4-201	cadherin-4 isoform X1 [Sus scrofa]	0.2	0.13	0.08	0.02	0.02	0.02	0.04	0.22	0.01	GO:0016021(cellular_component:integral component of membrane); GO:0005913(cellular_component:cell-cell adherens junction); GO:0016342(cellular_component:catenin complex); GO:0000902(biological_process:cell morphogenesis); GO:0008092(molecular_function:cytoskeletal protein binding); GO:0098609(biological_process:cell-cell adhesion); GO:0034332(biological_process:adherens junction organization); GO…	K06797	CDH4	map04514(Cell adhesion molecules (CAMs))	ENOG410XQHI(O:Posttranslational modification, protein turnover, chaperones)	XP_020933864.1(cadherin-4 isoform X1 [Sus scrofa])	sp|P55283|CADH4_HUMAN(Cadherin-4 OS=Homo sapiens OX=9606 GN=CDH4 PE=2 SV=2)	PF00028.17(Cadherin:Cadherin domain); PF01049.17(Cadherin_C:Cadherin cytoplasmic region); PF08758.11(Cadherin_pro:Cadherin prodomain like); PF16184.5(Cadherin_3:Cadherin-like); PF05345.12(He_PIG:Putative Ig domain)
Pig.02298.1	Pig.02298	GLDN-201	gliomedin [Sus scrofa]	0.16	0.16	0.23	0.16	0.04	0.11	0.63	0.57	0.98	GO:0045162(biological_process:clustering of voltage-gated sodium channels); GO:0005615(cellular_component:extracellular space); GO:0009986(cellular_component:cell surface); GO:0032528(biological_process:microvillus organization); GO:0005886(cellular_component:plasma membrane); GO:0086080(molecular_function:protein binding involved in heterotypic cell-cell adhesion)	K16364	GLDN		ENOG4110Z7Z(U:Intracellular trafficking, secretion, and vesicular transport)	XP_001926816.1(gliomedin [Sus scrofa])	sp|Q6ZMI3|GLDN_HUMAN(Gliomedin OS=Homo sapiens OX=9606 GN=GLDN PE=1 SV=1)	PF01391.18(Collagen:Collagen triple helix repeat (20 copies))
Pig.18904.1	Pig.18904	TMEM269-201	PREDICTED: CDP-diacylglycerol--serine O-phosphatidyltransferase isoform X2 [Ovis aries]	0	0	0	0	0	0.02	0.03	0	0	GO:0016021(cellular_component:integral component of membrane)				ENOG410ZSW1(S:Function unknown)	XP_020770328.1(transmembrane protein 269 isoform X1 [Odocoileus virginianus texanus])	sp|Q9D4Y8|TM269_MOUSE(Transmembrane protein 269 OS=Mus musculus OX=10090 GN=Tmem269 PE=2 SV=1)	PF01066.21(CDP-OH_P_transf:CDP-alcohol phosphatidyltransferase)
MSTRG.34975.2	MSTRG.34975			0.19	0	0	0.33	0.14	0.2	0.71	0.13	1.57					ENOG410XSNE(O:Posttranslational modification, protein turnover, chaperones)	XP_020928206.1(inactive ubiquitin carboxyl-terminal hydrolase 54 isoform X5 [Sus scrofa] >XP_020928208.1 inactive ubiquitin carboxyl-terminal hydrolase 54 isoform X5 [Sus scrofa] >XP_020928209.1 inactive ubiquitin carboxyl-terminal hydrolase 54 isoform X5 [Sus scrofa])	sp|Q70EL1|UBP54_HUMAN(Inactive ubiquitin carboxyl-terminal hydrolase 54 OS=Homo sapiens OX=9606 GN=USP54 PE=1 SV=4)	PF00443.29(UCH:Ubiquitin carboxyl-terminal hydrolase); PF13423.6(UCH_1:Ubiquitin carboxyl-terminal hydrolase)
Pig.10685.1	Pig.10685	FXYD4-201	FXYD domain-containing ion transport regulator 4 [Sus scrofa]	0	0	0	0	0	0	0	0	0	GO:0006811(biological_process:ion transport); GO:0016021(cellular_component:integral component of membrane); GO:0043269(biological_process:regulation of ion transport); GO:0099106(molecular_function:ion channel regulator activity)	K13359	FXYD4, CHIF	map04960(Aldosterone-regulated sodium reabsorption)	ENOG4111AWX(S:Function unknown)	XP_013838713.1(FXYD domain-containing ion transport regulator 4 [Sus scrofa])	sp|Q63113|FXYD4_RAT(FXYD domain-containing ion transport regulator 4 OS=Rattus norvegicus OX=10116 GN=Fxyd4 PE=1 SV=1)	PF02038.16(ATP1G1_PLM_MAT8:ATP1G1/PLM/MAT8 family)
Pig.22147.1	Pig.22147	STMN3-201	stathmin-3 [Sus scrofa]	0	0	0.03	0	0.02	0	0.01	0.17	0	GO:0031110(biological_process:regulation of microtubule polymerization or depolymerization); GO:0005737(cellular_component:cytoplasm); GO:0015631(molecular_function:tubulin binding); GO:0043005(cellular_component:neuron projection); GO:0005794(cellular_component:Golgi apparatus); GO:0005829(cellular_component:cytosol); GO:0007019(biological_process:microtubule depolymerization); GO:0051493(biolog…				ENOG4111H1E(Z:Cytoskeleton)	XP_020933496.1(stathmin-3 [Sus scrofa])	sp|A4IFK9|STMN3_BOVIN(Stathmin-3 OS=Bos taurus OX=9913 GN=STMN3 PE=2 SV=1)	PF00836.19(Stathmin:Stathmin family)
Pig.07633.1	Pig.07633	GALNT3-201	polypeptide N-acetylgalactosaminyltransferase 6 isoform X1 [Sus scrofa]	0.38	0.86	1.23	0.57	0.59	0.75	0.74	0.6	0.92	GO:0005794(cellular_component:Golgi apparatus); GO:0006486(biological_process:protein glycosylation); GO:0016021(cellular_component:integral component of membrane); GO:0004653(molecular_function:polypeptide N-acetylgalactosaminyltransferase activity); GO:0030246(molecular_function:carbohydrate binding); GO:0000139(cellular_component:Golgi membrane); GO:0016757(molecular_function:transferase activ…	K00710	GALNT	map00512(Mucin type O-glycan biosynthesis)	ENOG410XPMK(Z:Cytoskeleton)	XP_020937384.1(polypeptide N-acetylgalactosaminyltransferase 6 isoform X1 [Sus scrofa])	sp|Q5EA41|GALT6_BOVIN(Polypeptide N-acetylgalactosaminyltransferase 6 OS=Bos taurus OX=9913 GN=GALNT6 PE=2 SV=1)	PF00535.26(Glycos_transf_2:Glycosyl transferase family 2); PF00652.22(Ricin_B_lectin:Ricin-type beta-trefoil lectin domain); PF02709.14(Glyco_transf_7C:N-terminal domain of galactosyltransferase); PF10111.9(Glyco_tranf_2_2:Glycosyltransferase like family 2)
MSTRG.18428.1	MSTRG.18428			9.93	3.02	8.73	7.09	3.58	5.73	4.41	11.5	9.32	GO:0003964(molecular_function:RNA-directed DNA polymerase activity); GO:0004519(molecular_function:endonuclease activity); GO:0046872(molecular_function:metal ion binding); GO:0007165(biological_process:signal transduction); GO:0004114(molecular_function:3',5'-cyclic-nucleotide phosphodiesterase activity)				ENOG410Y3WU(S:Function unknown)	ABR01162.1(endonuclease/reverse transcriptase [Sus scrofa])	sp|P11369|LORF2_MOUSE(LINE-1 retrotransposable element ORF2 protein OS=Mus musculus OX=10090 GN=Pol PE=1 SV=2)	PF08333.11(DUF1725:Protein of unknown function (DUF1725))
MSTRG.10583.1	MSTRG.10583			0.26	0.15	0.35	0.56	0.38	0.51	0.36	0.61	0.39	GO:0003964(molecular_function:RNA-directed DNA polymerase activity); GO:0004519(molecular_function:endonuclease activity)				ENOG410Y3WU(S:Function unknown); ENOG410Y65V(S:Function unknown)	ABR01162.1(endonuclease/reverse transcriptase [Sus scrofa])	sp|O00370|LORF2_HUMAN(LINE-1 retrotransposable element ORF2 protein OS=Homo sapiens OX=9606 PE=1 SV=1)	PF12488.8(DUF3704:Protein of unknown function (DUF3704))
Pig.11397.1	Pig.11397	RPP21-201	PREDICTED: ribonuclease P protein subunit p21 isoform X1 [Tursiops truncatus]	7.31	8.45	4.38	4.63	4.73	4.09	13.38	12.42	13.35	GO:0008033(biological_process:tRNA processing); GO:0033204(molecular_function:ribonuclease P RNA binding); GO:0005655(cellular_component:nucleolar ribonuclease P complex); GO:0004526(molecular_function:ribonuclease P activity); GO:0042493(biological_process:response to drug); GO:0001682(biological_process:tRNA 5'-leader removal)	K03540	RPR2, RPP21	map03013(RNA transport)	COG2023(J:Translation, ribosomal structure and biogenesis)	NP_001231623.1(ribonuclease P protein subunit p21 [Sus scrofa])	sp|Q5TM57|RPP21_MACMU(Ribonuclease P protein subunit p21 OS=Macaca mulatta OX=9544 GN=RPP21 PE=3 SV=1)	PF04032.16(Rpr2:RNAse P Rpr2/Rpp21/SNM1 subunit domain)
Pig.23450.1	Pig.23450	RNF135-201	E3 ubiquitin-protein ligase RNF135 [Sus scrofa]	0	0	0.11	0.08	0.13	0	0	0.13	0.13	GO:0005737(cellular_component:cytoplasm); GO:0045088(biological_process:regulation of innate immune response); GO:0016874(molecular_function:ligase activity); GO:0032728(biological_process:positive regulation of interferon-beta production); GO:0043021(molecular_function:ribonucleoprotein complex binding); GO:0046872(molecular_function:metal ion binding); GO:0004842(molecular_function:ubiquitin-pr…	K16272	RNF135		ENOG4111G04(S:Function unknown); ENOG410Z2NG(O:Posttranslational modification, protein turnover, chaperones); ENOG410YVQN(S:Function unknown)	XP_003131783.1(E3 ubiquitin-protein ligase RNF135 [Sus scrofa])	sp|Q8IUD6|RN135_HUMAN(E3 ubiquitin-protein ligase RNF135 OS=Homo sapiens OX=9606 GN=RNF135 PE=1 SV=2)
Pig.17549.1	Pig.17549	LOXL1-201	lysyl oxidase homolog 1 [Sus scrofa]	1.37	1.57	0.97	0.88	0.79	0.65	9.69	18.57	11	GO:0016641(molecular_function:oxidoreductase activity, acting on the CH-NH2 group of donors, oxygen as acceptor); GO:0005507(molecular_function:copper ion binding); GO:0005615(cellular_component:extracellular space); GO:0018057(biological_process:peptidyl-lysine oxidation); GO:0004720(molecular_function:protein-lysine 6-oxidase activity)	K14678	LOXL1		ENOG41101E4(O:Posttranslational modification, protein turnover, chaperones)	XP_005666227.1(lysyl oxidase homolog 1 [Sus scrofa])	sp|Q08397|LOXL1_HUMAN(Lysyl oxidase homolog 1 OS=Homo sapiens OX=9606 GN=LOXL1 PE=1 SV=2)	PF01186.17(Lysyl_oxidase:Lysyl oxidase)
Pig.20934.1	Pig.20934	PNPLA6-203	patatin-like phospholipase domain-containing protein 7 isoform X6 [Sus scrofa]	9.72	12.7	11.48	5.92	4.04	5.21	9.38	12.02	12.24		K14676	NTE, NRE	map00564(Glycerophospholipid metabolism)	COG1752(L:Replication, recombination and repair)	XP_020936731.1(patatin-like phospholipase domain-containing protein 7 isoform X4 [Sus scrofa])	sp|Q5BK26|PLPL7_RAT(Patatin-like phospholipase domain-containing protein 7 OS=Rattus norvegicus OX=10116 GN=Pnpla7 PE=1 SV=2)	PF00027.29(cNMP_binding:Cyclic nucleotide-binding domain)
MSTRG.38131.1	MSTRG.38131			0	0	0.01	0	0	0.01	0	0	0	GO:0005507(molecular_function:copper ion binding); GO:0055114(biological_process:oxidation-reduction process)					XP_028365193.1(LINE-1 type transposase domain-containing protein 1 [Phyllostomus discolor])	sp|Q9UN81|LORF1_HUMAN(LINE-1 retrotransposable element ORF1 protein OS=Homo sapiens OX=9606 GN=L1RE1 PE=1 SV=1)
Pig.05621.1	Pig.05621	Pdzph1	pleckstriny domain containing, family A member 5-like protein [Camelus ferus]	0.05	0.04	0.1	0.03	0.04	0.04	0	0	0	GO:0016787(molecular_function:hydrolase activity)				ENOG410XTF2(S:Function unknown)	TEA32072.1(hypothetical protein DBR06_SOUSAS32110004, partial [Sousa chinensis])	sp|Q6IQ23|PKHA7_HUMAN(Pleckstrin homology domain-containing family A member 7 OS=Homo sapiens OX=9606 GN=PLEKHA7 PE=1 SV=2)	PF00169.29(PH:PH domain); PF00595.24(PDZ:PDZ domain); PF17820.1(PDZ_6:PDZ domain); PF13180.6(PDZ_2:PDZ domain); PF15409.6(PH_8:Pleckstrin homology domain)
[truncated: 21,977 more rows]
