# Supplementary material for: Integrated Analysis of Liver Transcriptome, miRNA, and Proteome of Chinese Indigenous Breed Ningxiang Pig in Three Developmental Stages Uncovers Significant miRNA–mRNA–Protein Networks in Lipid Metabolism
Source: Front Genet. 2021 Sep 16;12:709521. doi: 10.3389/fgene.2021.709521 (PMC8481880; doi:10.3389/fgene.2021.709521)
Supplement: Supplementary File 5 — Kyoto Encyclopedia of Genes and Genomes pathways for upregulated and downregulated DEPs from N90 vs. N30 d and N210 vs. N90 d. Pathways marked gray background represent significant enrichment, while other terms represent non-significant enrichment. [file Table_5.XLS]

## Sheet: sheet
Upregulated KEGG pathway (N90 d vs N30 d)
Protein Number	Pathway_ID	KEGG Description	Database	Ratio_in_study	Ratio_in_pop	P_value_uncorrected	P_value_corrected
11	ssc00260	Glycine, serine and threonine metabolism	KEGG PATHWAY	11/82	36/1065	3.56902e-05	0.0010707
8	ssc04664	Fc epsilon RI signaling pathway	KEGG PATHWAY	8/82	20/1065	5.19503e-05	0.00116888
7	ssc04672	Intestinal immune network for IgA production	KEGG PATHWAY	7/82	14/1065	2.75787e-05	0.00124104
7	ssc04064	NF-kappa B signaling pathway	KEGG PATHWAY	7/82	14/1065	2.75787e-05	0.00124104
7	ssc05310	Asthma	KEGG PATHWAY	7/82	15/1065	4.85085e-05	0.00124736
8	ssc05330	Allograft rejection	KEGG PATHWAY	8/82	18/1065	2.05193e-05	0.00184673
8	ssc05320	Autoimmune thyroid disease	KEGG PATHWAY	8/82	18/1065	2.05193e-05	0.00184673
8	ssc05140	Leishmaniasis	KEGG PATHWAY	8/82	22/1065	0.000115982	0.00231963
7	ssc05143	African trypanosomiasis	KEGG PATHWAY	7/82	17/1065	0.000129021	0.00232237
7	ssc05340	Primary immunodeficiency	KEGG PATHWAY	7/82	13/1065	1.46997e-05	0.00264595
11	ssc00310	Lysine degradation	KEGG PATHWAY	11/82	43/1065	0.000217764	0.00301519
12	ssc00380	Tryptophan metabolism	KEGG PATHWAY	12/82	50/1065	0.000212722	0.00319083
7	ssc04072	Phospholipase D signaling pathway	KEGG PATHWAY	7/82	18/1065	0.000198067	0.0032411
11	ssc00410	beta-Alanine metabolism	KEGG PATHWAY	11/82	44/1065	0.000272238	0.0035002
13	ssc00280	Valine, leucine and isoleucine degradation	KEGG PATHWAY	13/82	60/1065	0.000343099	0.00411719
7	ssc04662	B cell receptor signaling pathway	KEGG PATHWAY	7/82	20/1065	0.000424669	0.00477753
7	ssc05323	Rheumatoid arthritis	KEGG PATHWAY	7/82	20/1065	0.000424669	0.00477753
7	ssc04650	Natural killer cell mediated cytotoxicity	KEGG PATHWAY	7/82	21/1065	0.000597654	0.00597654
7	ssc05202	Transcriptional misregulation in cancer	KEGG PATHWAY	7/82	21/1065	0.000597654	0.00597654
7	ssc04666	Fc gamma R-mediated phagocytosis	KEGG PATHWAY	7/82	22/1065	0.000822434	0.0074019
9	ssc05322	Systemic lupus erythematosus	KEGG PATHWAY	9/82	36/1065	0.00103457	0.00846463
8	ssc00270	Cysteine and methionine metabolism	KEGG PATHWAY	8/82	29/1065	0.000993542	0.00851607
8	ssc05150	Staphylococcus aureus infection	KEGG PATHWAY	8/82	30/1065	0.00127071	0.00953034
5	ssc05332	Graft-versus-host disease	KEGG PATHWAY	5/82	12/1065	0.00123589	0.00967217
7	ssc04640	Hematopoietic cell lineage	KEGG PATHWAY	7/82	24/1065	0.00146944	0.0105799
7	ssc04514	Cell adhesion molecules	KEGG PATHWAY	7/82	25/1065	0.00191505	0.0114903
5	ssc04940	Type I diabetes mellitus	KEGG PATHWAY	5/82	13/1065	0.00188771	0.0117168
4	ssc04658	Th1 and Th2 cell differentiation	KEGG PATHWAY	4/82	8/1065	0.00180373	0.0120249
4	ssc05321	Inflammatory bowel disease	KEGG PATHWAY	4/82	8/1065	0.00180373	0.0120249
11	ssc00071	Fatty acid degradation	KEGG PATHWAY	11/82	54/1065	0.001783	0.0123438
6	ssc00360	Phenylalanine metabolism	KEGG PATHWAY	6/82	20/1065	0.0028032	0.0148405
47	ssc01100	Metabolic pathways	KEGG PATHWAY	47/82	447/1065	0.00259468	0.0150659
9	ssc05146	Amoebiasis	KEGG PATHWAY	9/82	41/1065	0.00279112	0.0152243
4	ssc05235	PD-L1 expression and PD-1 checkpoint pathway in cancer	KEGG PATHWAY	4/82	9/1065	0.00305722	0.0152861
5	ssc04660	T cell receptor signaling pathway	KEGG PATHWAY	5/82	14/1065	0.00276032	0.0155268
8	ssc05416	Viral myocarditis	KEGG PATHWAY	8/82	34/1065	0.00305091	0.0156904
10	ssc00982	Drug metabolism - cytochrome P450	KEGG PATHWAY	10/82	51/1065	0.00394297	0.019182
7	ssc04020	Calcium signaling pathway	KEGG PATHWAY	7/82	29/1065	0.00482219	0.0211706
8	ssc00350	Tyrosine metabolism	KEGG PATHWAY	8/82	36/1065	0.00447403	0.0211928
8	ssc00330	Arginine and proline metabolism	KEGG PATHWAY	8/82	36/1065	0.00447403	0.0211928
4	ssc04659	Th17 cell differentiation	KEGG PATHWAY	4/82	10/1065	0.00479857	0.0215936
6	ssc00340	Histidine metabolism	KEGG PATHWAY	6/82	23/1065	0.0060472	0.0259166
6	ssc00561	Glycerolipid metabolism	KEGG PATHWAY	6/82	24/1065	0.00757312	0.0317014
7	ssc05414	Dilated cardiomyopathy	KEGG PATHWAY	7/82	32/1065	0.00859752	0.0343901
9	ssc04151	PI3K-Akt signaling pathway	KEGG PATHWAY	9/82	48/1065	0.00852084	0.034858
6	ssc04014	Ras signaling pathway	KEGG PATHWAY	6/82	25/1065	0.00935988	0.0366256
8	ssc05169	Epstein-Barr virus infection	KEGG PATHWAY	8/82	42/1065	0.0118945	0.043694
8	ssc05152	Tuberculosis	KEGG PATHWAY	8/82	42/1065	0.0118945	0.043694
6	ssc04015	Rap1 signaling pathway	KEGG PATHWAY	6/82	26/1065	0.0114301	0.0437749
6	ssc00062	Fatty acid elongation	KEGG PATHWAY	6/82	26/1065	0.0114301	0.0437749
6	ssc00053	Ascorbate and aldarate metabolism	KEGG PATHWAY	6/82	27/1065	0.0138058	0.0487263
7	ssc00650	Butanoate metabolism	KEGG PATHWAY	7/82	35/1065	0.0142064	0.0491761
5	ssc05142	Chagas disease	KEGG PATHWAY	5/82	20/1065	0.0147762	0.0501833
6	ssc05166	Human T-cell leukemia virus 1 infection	KEGG PATHWAY	6/82	31/1065	0.0267649	0.0892162
4	ssc05144	Malaria	KEGG PATHWAY	4/82	16/1065	0.0290935	0.095215
2	ssc00750	Vitamin B6 metabolism	KEGG PATHWAY	2/82	4/1065	0.0317383	0.102016
10	ssc04146	Peroxisome	KEGG PATHWAY	10/82	69/1065	0.0329213	0.103962
8	ssc00640	Propanoate metabolism	KEGG PATHWAY	8/82	51/1065	0.0361891	0.112311
9	ssc04145	Phagosome	KEGG PATHWAY	9/82	61/1065	0.0383066	0.116868
8	ssc00980	Metabolism of xenobiotics by cytochrome P450	KEGG PATHWAY	8/82	52/1065	0.0401398	0.120419
9	ssc00830	Retinol metabolism	KEGG PATHWAY	9/82	62/1065	0.0420382	0.124047
13	ssc01200	Carbon metabolism	KEGG PATHWAY	13/82	103/1065	0.0441668	0.128226
3	ssc00670	One carbon pool by folate	KEGG PATHWAY	3/82	11/1065	0.0462364	0.132104
8	ssc00010	Glycolysis / Gluconeogenesis	KEGG PATHWAY	8/82	56/1065	0.058813	0.165412
4	ssc05135	Yersinia infection	KEGG PATHWAY	4/82	20/1065	0.0612099	0.169504
8	ssc05204	Chemical carcinogenesis	KEGG PATHWAY	8/82	58/1065	0.0699411	0.190748
7	ssc00620	Pyruvate metabolism	KEGG PATHWAY	7/82	49/1065	0.075305	0.202312
1	ssc00290	Valine, leucine and isoleucine biosynthesis	KEGG PATHWAY	1/82	1/1065	0.0769953	0.203811
1	ssc03440	Homologous recombination	KEGG PATHWAY	1/82	1/1065	0.0769953	0.203811
1	ssc03030	DNA replication	KEGG PATHWAY	1/82	1/1065	0.0769953	0.203811
1	ssc03430	Mismatch repair	KEGG PATHWAY	1/82	1/1065	0.0769953	0.203811
4	ssc05162	Measles	KEGG PATHWAY	4/82	22/1065	0.0822338	0.205585
2	ssc00920	Sulfur metabolism	KEGG PATHWAY	2/82	7/1065	0.0954612	0.235384
6	ssc01230	Biosynthesis of amino acids	KEGG PATHWAY	6/82	45/1065	0.125058	0.296189
5	ssc05168	Herpes simplex virus 1 infection	KEGG PATHWAY	5/82	35/1065	0.124936	0.303898
5	ssc05170	Human immunodeficiency virus 1 infection	KEGG PATHWAY	5/82	35/1065	0.124936	0.303898
5	ssc00630	Glyoxylate and dicarboxylate metabolism	KEGG PATHWAY	5/82	36/1065	0.136709	0.31958
5	ssc04612	Antigen processing and presentation	KEGG PATHWAY	5/82	36/1065	0.136709	0.31958
3	ssc00860	Porphyrin and chlorophyll metabolism	KEGG PATHWAY	3/82	18/1065	0.155469	0.354234
2	ssc00900	Terpenoid backbone biosynthesis	KEGG PATHWAY	2/82	10/1065	0.176313	0.391806
3	ssc04520	Adherens junction	KEGG PATHWAY	3/82	19/1065	0.174884	0.39349
2	ssc04978	Mineral absorption	KEGG PATHWAY	2/82	11/1065	0.205219	0.45048
3	ssc00250	Alanine, aspartate and glutamate metabolism	KEGG PATHWAY	3/82	21/1065	0.215549	0.46189
1	ssc00740	Riboflavin metabolism	KEGG PATHWAY	1/82	3/1065	0.213843	0.463755
3	ssc05145	Toxoplasmosis	KEGG PATHWAY	3/82	22/1065	0.236598	0.489514
2	ssc00760	Nicotinate and nicotinamide metabolism	KEGG PATHWAY	2/82	12/1065	0.234602	0.496804
2	ssc04974	Protein digestion and absorption	KEGG PATHWAY	2/82	12/1065	0.234602	0.496804
6	ssc01212	Fatty acid metabolism	KEGG PATHWAY	6/82	58/1065	0.28432	0.556278
1	ssc04330	Notch signaling pathway	KEGG PATHWAY	1/82	4/1065	0.274544	0.561567
1	ssc05219	Bladder cancer	KEGG PATHWAY	1/82	4/1065	0.274544	0.561567
1	ssc05218	Melanoma	KEGG PATHWAY	1/82	4/1065	0.274544	0.561567
1	ssc00430	Taurine and hypotaurine metabolism	KEGG PATHWAY	1/82	4/1065	0.274544	0.561567
3	ssc00120	Primary bile acid biosynthesis	KEGG PATHWAY	3/82	25/1065	0.301499	0.583547
5	ssc03320	PPAR signaling pathway	KEGG PATHWAY	5/82	49/1065	0.323463	0.612876
3	ssc05164	Influenza A	KEGG PATHWAY	3/82	26/1065	0.323433	0.61934
1	ssc01521	EGFR tyrosine kinase inhibitor resistance	KEGG PATHWAY	1/82	5/1065	0.330611	0.619896
1	ssc05030	Cocaine addiction	KEGG PATHWAY	1/82	5/1065	0.330611	0.619896
1	ssc00562	Inositol phosphate metabolism	KEGG PATHWAY	1/82	5/1065	0.330611	0.619896
1	ssc00400	Phenylalanine, tyrosine and tryptophan biosynthesis	KEGG PATHWAY	1/82	5/1065	0.330611	0.619896
1	ssc05216	Thyroid cancer	KEGG PATHWAY	1/82	5/1065	0.330611	0.619896
1	ssc00232	Caffeine metabolism	KEGG PATHWAY	1/82	5/1065	0.330611	0.619896
1	ssc05220	Chronic myeloid leukemia	KEGG PATHWAY	1/82	6/1065	0.382394	0.674813
1	ssc04630	JAK-STAT signaling pathway	KEGG PATHWAY	1/82	6/1065	0.382394	0.674813
3	ssc00590	Arachidonic acid metabolism	KEGG PATHWAY	3/82	30/1065	0.410713	0.710849
4	ssc00983	Drug metabolism - other enzymes	KEGG PATHWAY	4/82	43/1065	0.425835	0.730003
1	ssc04370	VEGF signaling pathway	KEGG PATHWAY	1/82	7/1065	0.430216	0.730556
1	ssc04120	Ubiquitin mediated proteolysis	KEGG PATHWAY	1/82	7/1065	0.430216	0.730556
1	ssc04080	Neuroactive ligand-receptor interaction	KEGG PATHWAY	1/82	7/1065	0.430216	0.730556
1	ssc04727	GABAergic synapse	KEGG PATHWAY	1/82	7/1065	0.430216	0.730556
1	ssc05213	Endometrial cancer	KEGG PATHWAY	1/82	7/1065	0.430216	0.730556
4	ssc05203	Viral carcinogenesis	KEGG PATHWAY	4/82	46/1065	0.479289	0.750191
2	ssc04390	Hippo signaling pathway	KEGG PATHWAY	2/82	20/1065	0.464085	0.752571
1	ssc05031	Amphetamine addiction	KEGG PATHWAY	1/82	8/1065	0.474377	0.762392
1	ssc00564	Glycerophospholipid metabolism	KEGG PATHWAY	1/82	8/1065	0.474377	0.762392
1	ssc03008	Ribosome biogenesis in eukaryotes	KEGG PATHWAY	1/82	8/1065	0.474377	0.762392
2	ssc04913	Ovarian steroidogenesis	KEGG PATHWAY	2/82	22/1065	0.515612	0.773418
1	ssc05226	Gastric cancer	KEGG PATHWAY	1/82	9/1065	0.515154	0.799377
1	ssc05020	Prion disease	KEGG PATHWAY	1/82	9/1065	0.515154	0.799377
1	ssc00592	alpha-Linolenic acid metabolism	KEGG PATHWAY	1/82	9/1065	0.515154	0.799377
1	ssc04928	Parathyroid hormone synthesis, secretion and action	KEGG PATHWAY	1/82	9/1065	0.515154	0.799377
2	ssc01040	Biosynthesis of unsaturated fatty acids	KEGG PATHWAY	2/82	23/1065	0.540147	0.803524
2	ssc05167	Kaposi sarcoma-associated herpesvirus infection	KEGG PATHWAY	2/82	24/1065	0.563827	0.805467
1	ssc04960	Aldosterone-regulated sodium reabsorption	KEGG PATHWAY	1/82	10/1065	0.552803	0.815611
1	ssc00500	Starch and sucrose metabolism	KEGG PATHWAY	1/82	10/1065	0.552803	0.815611
1	ssc00970	Aminoacyl-tRNA biosynthesis	KEGG PATHWAY	1/82	10/1065	0.552803	0.815611
1	ssc00450	Selenocompound metabolism	KEGG PATHWAY	1/82	10/1065	0.552803	0.815611
1	ssc04310	Wnt signaling pathway	KEGG PATHWAY	1/82	11/1065	0.587562	0.826258
1	ssc04728	Dopaminergic synapse	KEGG PATHWAY	1/82	11/1065	0.587562	0.826258
2	ssc04010	MAPK signaling pathway	KEGG PATHWAY	2/82	25/1065	0.586638	0.831456
2	ssc00040	Pentose and glucuronate interconversions	KEGG PATHWAY	2/82	28/1065	0.649806	0.886099
2	ssc00480	Glutathione metabolism	KEGG PATHWAY	2/82	28/1065	0.649806	0.886099
1	ssc01524	Platinum drug resistance	KEGG PATHWAY	1/82	13/1065	0.649268	0.898986
1	ssc00790	Folate biosynthesis	KEGG PATHWAY	1/82	13/1065	0.649268	0.898986
1	ssc04216	Ferroptosis	KEGG PATHWAY	1/82	14/1065	0.676606	0.908874
1	ssc00240	Pyrimidine metabolism	KEGG PATHWAY	1/82	14/1065	0.676606	0.908874
1	ssc00220	Arginine biosynthesis	KEGG PATHWAY	1/82	14/1065	0.676606	0.908874
2	ssc05165	Human papillomavirus infection	KEGG PATHWAY	2/82	31/1065	0.705194	0.919819
1	ssc00052	Galactose metabolism	KEGG PATHWAY	1/82	15/1065	0.701838	0.922123
1	ssc04213	Longevity regulating pathway - multiple species	KEGG PATHWAY	1/82	16/1065	0.725123	0.932301
2	ssc04530	Tight junction	KEGG PATHWAY	2/82	32/1065	0.721991	0.934953
2	ssc04810	Regulation of actin cytoskeleton	KEGG PATHWAY	2/82	35/1065	0.767666	0.946437
1	ssc03013	RNA transport	KEGG PATHWAY	1/82	19/1065	0.784729	0.947994
1	ssc04723	Retrograde endocannabinoid signaling	KEGG PATHWAY	1/82	19/1065	0.784729	0.947994
2	ssc05205	Proteoglycans in cancer	KEGG PATHWAY	2/82	36/1065	0.781397	0.950347
1	ssc04670	Leukocyte transendothelial migration	KEGG PATHWAY	1/82	23/1065	0.844777	0.950374
1	ssc04910	Insulin signaling pathway	KEGG PATHWAY	1/82	23/1065	0.844777	0.950374
1	ssc05225	Hepatocellular carcinoma	KEGG PATHWAY	1/82	24/1065	0.856993	0.952214
1	ssc04610	Complement and coagulation cascades	KEGG PATHWAY	1/82	17/1065	0.74661	0.953119
1	ssc05412	Arrhythmogenic right ventricular cardiomyopathy	KEGG PATHWAY	1/82	21/1065	0.817172	0.955137
1	ssc05034	Alcoholism	KEGG PATHWAY	1/82	20/1065	0.801605	0.955555
1	ssc05100	Bacterial invasion of epithelial cells	KEGG PATHWAY	1/82	20/1065	0.801605	0.955555
1	ssc04218	Cellular senescence	KEGG PATHWAY	1/82	20/1065	0.801605	0.955555
3	ssc05200	Pathways in cancer	KEGG PATHWAY	3/82	52/1065	0.781263	0.956649
1	ssc05163	Human cytomegalovirus infection	KEGG PATHWAY	1/82	25/1065	0.868257	0.958812
1	ssc05134	Legionellosis	KEGG PATHWAY	1/82	22/1065	0.831532	0.965651
1	ssc04931	Insulin resistance	KEGG PATHWAY	1/82	22/1065	0.831532	0.965651
1	ssc04726	Serotonergic synapse	KEGG PATHWAY	1/82	22/1065	0.831532	0.965651
1	ssc04210	Apoptosis	KEGG PATHWAY	1/82	22/1065	0.831532	0.965651
1	ssc00230	Purine metabolism	KEGG PATHWAY	1/82	22/1065	0.831532	0.965651
1	ssc04152	AMPK signaling pathway	KEGG PATHWAY	1/82	30/1065	0.912697	0.966385
1	ssc04976	Bile secretion	KEGG PATHWAY	1/82	27/1065	0.888222	0.96897
1	ssc04922	Glucagon signaling pathway	KEGG PATHWAY	1/82	29/1065	0.905193	0.96985
2	ssc04141	Protein processing in endoplasmic reticulum	KEGG PATHWAY	2/82	46/1065	0.884146	0.970405
2	ssc00190	Oxidative phosphorylation	KEGG PATHWAY	2/82	50/1065	0.911142	0.970447
1	ssc04371	Apelin signaling pathway	KEGG PATHWAY	1/82	18/1065	0.766436	0.971539
1	ssc00051	Fructose and mannose metabolism	KEGG PATHWAY	1/82	18/1065	0.766436	0.971539
1	ssc05133	Pertussis	KEGG PATHWAY	1/82	18/1065	0.766436	0.971539
1	ssc00520	Amino sugar and nucleotide sugar metabolism	KEGG PATHWAY	1/82	18/1065	0.766436	0.971539
1	ssc04217	Necroptosis	KEGG PATHWAY	1/82	28/1065	0.897053	0.972708
2	ssc00140	Steroid hormone biosynthesis	KEGG PATHWAY	2/82	49/1065	0.904998	0.975447
1	ssc04510	Focal adhesion	KEGG PATHWAY	1/82	35/1065	0.942266	0.980393
1	ssc05418	Fluid shear stress and atherosclerosis	KEGG PATHWAY	1/82	33/1065	0.931864	0.980909
1	ssc03040	Spliceosome	KEGG PATHWAY	1/82	33/1065	0.931864	0.980909
1	ssc05016	Huntington disease	KEGG PATHWAY	1/82	64/1065	0.994971	0.994971
1	ssc04144	Endocytosis	KEGG PATHWAY	1/82	45/1065	0.974911	0.997068
1	ssc04932	Non-alcoholic fatty liver disease	KEGG PATHWAY	1/82	44/1065	0.97272	1
2	ssc03010	Ribosome	KEGG PATHWAY	2/82	67/1065	0.972799	1
1	ssc05010	Alzheimer disease	KEGG PATHWAY	1/82	57/1065	0.990875	1
1	ssc05012	Parkinson disease	KEGG PATHWAY	1/82	61/1065	0.993504	1
1	ssc04714	Thermogenesis	KEGG PATHWAY	1/82	63/1065	0.994523	1

## Sheet: Sheet2
Upregulated KEGG pathway (N210 d vs N90 d)
Protein Number	Pathway_ID	KEGG Description	Database	Ratio_in_study	Ratio_in_pop	P_value_uncorrected	P_value_corrected
3	ssc04974	Protein digestion and absorption	KEGG PATHWAY	3/72	12/1065	0.0419045	1
3	ssc00790	Folate biosynthesis	KEGG PATHWAY	3/72	13/1065	0.0518899	1
1	ssc00603	Glycosphingolipid biosynthesis - globo and isoglobo series	KEGG PATHWAY	1/72	1/1065	0.0676056	1
36	ssc01100	Metabolic pathways	KEGG PATHWAY	36/72	447/1065	0.0963168	1
2	ssc00600	Sphingolipid metabolism	KEGG PATHWAY	2/72	8/1065	0.0968304	1
2	ssc05020	Prion disease	KEGG PATHWAY	2/72	9/1065	0.119202	1
2	ssc04966	Collecting duct acid secretion	KEGG PATHWAY	2/72	9/1065	0.119202	1
4	ssc00270	Cysteine and methionine metabolism	KEGG PATHWAY	4/72	29/1065	0.126507	1
1	ssc00604	Glycosphingolipid biosynthesis - ganglio series	KEGG PATHWAY	1/72	2/1065	0.1307	1
3	ssc04972	Pancreatic secretion	KEGG PATHWAY	3/72	19/1065	0.13177	1
7	ssc04146	Peroxisome	KEGG PATHWAY	7/72	69/1065	0.177651	1
5	ssc01230	Biosynthesis of amino acids	KEGG PATHWAY	5/72	45/1065	0.182127	1
1	ssc00531	Glycosaminoglycan degradation	KEGG PATHWAY	1/72	3/1065	0.18958	1
1	ssc05032	Morphine addiction	KEGG PATHWAY	1/72	3/1065	0.18958	1
2	ssc04971	Gastric acid secretion	KEGG PATHWAY	2/72	12/1065	0.192115	1
2	ssc04975	Fat digestion and absorption	KEGG PATHWAY	2/72	12/1065	0.192115	1
2	ssc04512	ECM-receptor interaction	KEGG PATHWAY	2/72	12/1065	0.192115	1
2	ssc04964	Proximal tubule bicarbonate reclamation	KEGG PATHWAY	2/72	12/1065	0.192115	1
4	ssc00260	Glycine, serine and threonine metabolism	KEGG PATHWAY	4/72	36/1065	0.221633	1
5	ssc00620	Pyruvate metabolism	KEGG PATHWAY	5/72	49/1065	0.231774	1
3	ssc04010	MAPK signaling pathway	KEGG PATHWAY	3/72	25/1065	0.235908	1
2	ssc00220	Arginine biosynthesis	KEGG PATHWAY	2/72	14/1065	0.243392	1
1	ssc00511	Other glycan degradation	KEGG PATHWAY	1/72	4/1065	0.244524	1
1	ssc04330	Notch signaling pathway	KEGG PATHWAY	1/72	4/1065	0.244524	1
3	ssc04976	Bile secretion	KEGG PATHWAY	3/72	27/1065	0.273505	1
3	ssc00480	Glutathione metabolism	KEGG PATHWAY	3/72	28/1065	0.292565	1
1	ssc04724	Glutamatergic synapse	KEGG PATHWAY	1/72	5/1065	0.295791	1
1	ssc04911	Insulin secretion	KEGG PATHWAY	1/72	5/1065	0.295791	1
4	ssc05146	Amoebiasis	KEGG PATHWAY	4/72	41/1065	0.298529	1
3	ssc04922	Glucagon signaling pathway	KEGG PATHWAY	3/72	29/1065	0.311726	1
3	ssc04152	AMPK signaling pathway	KEGG PATHWAY	3/72	30/1065	0.330935	1
1	ssc00910	Nitrogen metabolism	KEGG PATHWAY	1/72	6/1065	0.343624	1
1	ssc05220	Chronic myeloid leukemia	KEGG PATHWAY	1/72	6/1065	0.343624	1
1	ssc04713	Circadian entrainment	KEGG PATHWAY	1/72	6/1065	0.343624	1
1	ssc04350	TGF-beta signaling pathway	KEGG PATHWAY	1/72	6/1065	0.343624	1
1	ssc04614	Renin-angiotensin system	KEGG PATHWAY	1/72	6/1065	0.343624	1
2	ssc00051	Fructose and mannose metabolism	KEGG PATHWAY	2/72	18/1065	0.346604	1
2	ssc04979	Cholesterol metabolism	KEGG PATHWAY	2/72	18/1065	0.346604	1
2	ssc00520	Amino sugar and nucleotide sugar metabolism	KEGG PATHWAY	2/72	18/1065	0.346604	1
5	ssc05204	Chemical carcinogenesis	KEGG PATHWAY	5/72	58/1065	0.354242	1
2	ssc04723	Retrograde endocannabinoid signaling	KEGG PATHWAY	2/72	19/1065	0.371879	1
1	ssc04370	VEGF signaling pathway	KEGG PATHWAY	1/72	7/1065	0.38825	1
1	ssc04973	Carbohydrate digestion and absorption	KEGG PATHWAY	1/72	7/1065	0.38825	1
1	ssc04080	Neuroactive ligand-receptor interaction	KEGG PATHWAY	1/72	7/1065	0.38825	1
1	ssc04727	GABAergic synapse	KEGG PATHWAY	1/72	7/1065	0.38825	1
2	ssc00061	Fatty acid biosynthesis	KEGG PATHWAY	2/72	20/1065	0.396772	1
4	ssc04151	PI3K-Akt signaling pathway	KEGG PATHWAY	4/72	48/1065	0.410271	1
3	ssc04510	Focal adhesion	KEGG PATHWAY	3/72	35/1065	0.426118	1
1	ssc00100	Steroid biosynthesis	KEGG PATHWAY	1/72	8/1065	0.429881	1
1	ssc00513	Various types of N-glycan biosynthesis	KEGG PATHWAY	1/72	8/1065	0.429881	1
1	ssc04725	Cholinergic synapse	KEGG PATHWAY	1/72	8/1065	0.429881	1
3	ssc05205	Proteoglycans in cancer	KEGG PATHWAY	3/72	36/1065	0.444708	1
3	ssc00630	Glyoxylate and dicarboxylate metabolism	KEGG PATHWAY	3/72	36/1065	0.444708	1
3	ssc00330	Arginine and proline metabolism	KEGG PATHWAY	3/72	36/1065	0.444708	1
2	ssc05140	Leishmaniasis	KEGG PATHWAY	2/72	22/1065	0.44517	1
2	ssc05134	Legionellosis	KEGG PATHWAY	2/72	22/1065	0.44517	1
2	ssc04726	Serotonergic synapse	KEGG PATHWAY	2/72	22/1065	0.44517	1
4	ssc00640	Propanoate metabolism	KEGG PATHWAY	4/72	51/1065	0.45756	1
2	ssc04910	Insulin signaling pathway	KEGG PATHWAY	2/72	23/1065	0.468576	1
1	ssc01210	2-Oxocarboxylic acid metabolism	KEGG PATHWAY	1/72	9/1065	0.468716	1
1	ssc04977	Vitamin digestion and absorption	KEGG PATHWAY	1/72	9/1065	0.468716	1
1	ssc04062	Chemokine signaling pathway	KEGG PATHWAY	1/72	9/1065	0.468716	1
4	ssc00980	Metabolism of xenobiotics by cytochrome P450	KEGG PATHWAY	4/72	52/1065	0.473076	1
2	ssc05167	Kaposi sarcoma-associated herpesvirus infection	KEGG PATHWAY	2/72	24/1065	0.491402	1
2	ssc04640	Hematopoietic cell lineage	KEGG PATHWAY	2/72	24/1065	0.491402	1

## Sheet: Sheet3
Downregulated KEGG pathway (N90 d vs N30 d)
Protein Number	Pathway_ID	KEGG Description	Database	Ratio_in_study	Ratio_in_pop	P_value_uncorrected	P_value_corrected
6	ssc04066	HIF-1 signaling pathway	KEGG PATHWAY	6/97	21/1065	0.00858717	1
7	ssc04922	Glucagon signaling pathway	KEGG PATHWAY	7/97	29/1065	0.0122332	1
4	ssc04512	ECM-receptor interaction	KEGG PATHWAY	4/97	12/1065	0.0180819	1
5	ssc00030	Pentose phosphate pathway	KEGG PATHWAY	5/97	19/1065	0.0234261	1
3	ssc04977	Vitamin digestion and absorption	KEGG PATHWAY	3/97	9/1065	0.0410336	1
5	ssc00230	Purine metabolism	KEGG PATHWAY	5/97	22/1065	0.042615	1

## Sheet: Sheet4
Downregulated KEGG pathway (N210 d vs N90 d)
Protein Number	Pathway_ID	KEGG Description	Database	Ratio_in_study	Ratio_in_pop	P_value_uncorrected	P_value_corrected
12	ssc03013	RNA transport	KEGG PATHWAY	12/207	19/1065	3.03789e-05	0.00874913
9	ssc03015	mRNA surveillance pathway	KEGG PATHWAY	9/207	14/1065	0.000273509	0.0393852
8	ssc03018	RNA degradation	KEGG PATHWAY	8/207	12/1065	0.000434821	0.0417428
6	ssc03008	Ribosome biogenesis in eukaryotes	KEGG PATHWAY	6/207	8/1065	0.000998404	0.0718851
15	ssc04144	Endocytosis	KEGG PATHWAY	15/207	45/1065	0.0174078	0.313341
15	ssc04141	Protein processing in endoplasmic reticulum	KEGG PATHWAY	15/207	46/1065	0.0214474	0.363344
5	ssc05211	Renal cell carcinoma	KEGG PATHWAY	5/207	9/1065	0.016918	0.374799
5	ssc05210	Colorectal cancer	KEGG PATHWAY	5/207	9/1065	0.016918	0.374799
5	ssc04062	Chemokine signaling pathway	KEGG PATHWAY	5/207	9/1065	0.016918	0.374799
12	ssc03040	Spliceosome	KEGG PATHWAY	12/207	33/1065	0.0159008	0.381618
6	ssc04071	Sphingolipid signaling pathway	KEGG PATHWAY	6/207	11/1065	0.00972864	0.400264
13	ssc05132	Salmonella infection	KEGG PATHWAY	13/207	40/1065	0.032383	0.405492
16	ssc00640	Propanoate metabolism	KEGG PATHWAY	16/207	51/1065	0.0257844	0.412551
9	ssc05134	Legionellosis	KEGG PATHWAY	9/207	22/1065	0.0158188	0.414165
4	ssc04370	VEGF signaling pathway	KEGG PATHWAY	4/207	7/1065	0.0297517	0.428425
4	ssc05231	Choline metabolism in cancer	KEGG PATHWAY	4/207	7/1065	0.0297517	0.428425
4	ssc04962	Vasopressin-regulated water reabsorption	KEGG PATHWAY	4/207	7/1065	0.0297517	0.428425
4	ssc05212	Pancreatic cancer	KEGG PATHWAY	4/207	6/1065	0.0150175	0.432504
5	ssc00970	Aminoacyl-tRNA biosynthesis	KEGG PATHWAY	5/207	10/1065	0.028569	0.433046
7	ssc00240	Pyrimidine metabolism	KEGG PATHWAY	7/207	14/1065	0.00943718	0.452985
8	ssc04140	Autophagy - animal	KEGG PATHWAY	8/207	18/1065	0.0130083	0.468299
11	ssc00020	Citrate cycle (TCA cycle)	KEGG PATHWAY	11/207	29/1065	0.0147764	0.472846
5	ssc04912	GnRH signaling pathway	KEGG PATHWAY	5/207	8/1065	0.00891422	0.513459
8	ssc05162	Measles	KEGG PATHWAY	8/207	22/1065	0.0466363	0.516587
5	ssc04310	Wnt signaling pathway	KEGG PATHWAY	5/207	11/1065	0.0442694	0.531232
5	ssc04722	Neurotrophin signaling pathway	KEGG PATHWAY	5/207	11/1065	0.0442694	0.531232
