# Supplementary material for: Integrated Analysis of Liver Transcriptome, miRNA, and Proteome of Chinese Indigenous Breed Ningxiang Pig in Three Developmental Stages Uncovers Significant miRNA–mRNA–Protein Networks in Lipid Metabolism
Source: Front Genet. 2021 Sep 16;12:709521. doi: 10.3389/fgene.2021.709521 (PMC8481880; doi:10.3389/fgene.2021.709521)
Supplement: Supplementary File 6 — Kyoto Encyclopedia of Genes and Genomes pathways were identified by KEGG pathway analysis of hepatic overlapping differentially expressed (DE) mRNAs from three comparison groups. [file Table_6.XLS]

## Sheet: KEGG analysis statistical table
Number	Pathway id	Description	Ratio_in_study	Ratio_in_pop	pvalue	padjust	First Category	Second Category
24	map04610	Complement and coagulation cascades	24/503	107/17855	2.07842e-15	5.84037e-13	Organismal Systems	Immune system
21	map04512	ECM-receptor interaction	21/503	125/17855	4.37245e-11	1.22866e-08	Environmental Information Processing	Signaling molecules and interaction
21	map03320	PPAR signaling pathway	21/503	142/17855	5.10992e-10	1.43589e-07	Organismal Systems	Endocrine system
16	map00140	Steroid hormone biosynthesis	16/503	84/17855	1.35808e-09	3.8162e-07	Metabolism	Lipid metabolism
18	map04974	Protein digestion and absorption	18/503	133/17855	3.67493e-08	1.03266e-05	Organismal Systems	Digestive system
16	map00830	Retinol metabolism	16/503	111/17855	8.61346e-08	2.42038e-05	Metabolism	Metabolism of cofactors and vitamins
19	map04152	AMPK signaling pathway	19/503	163/17855	1.74924e-07	4.91536e-05	Environmental Information Processing	Signal transduction
16	map05204	Chemical carcinogenesis	16/503	117/17855	1.81979e-07	5.11362e-05	Human Diseases	Cancer: overview
9	map00860	Porphyrin and chlorophyll metabolism	9/503	45/17855	3.73677e-06	0.00105003	Metabolism	Metabolism of cofactors and vitamins
11	map04979	Cholesterol metabolism	11/503	70/17855	3.83214e-06	0.00107683	Organismal Systems	Digestive system
11	map04923	Regulation of lipolysis in adipocytes	11/503	82/17855	1.82954e-05	0.005141	Organismal Systems	Endocrine system
11	map05412	Arrhythmogenic right ventricular cardiomyopathy (ARVC)	11/503	91/17855	4.92447e-05	0.0138378	Human Diseases	Cardiovascular disease
11	map04918	Thyroid hormone synthesis	11/503	104/17855	0.000167171	0.0469749	Organismal Systems	Endocrine system
8	map04975	Fat digestion and absorption	8/503	58/17855	0.000208565	0.0586066	Organismal Systems	Digestive system
7	map05020	Prion diseases	7/503	45/17855	0.000242305	0.0680876	Human Diseases	Neurodegenerative disease
10	map04920	Adipocytokine signaling pathway	10/503	95/17855	0.000341319	0.0959107	Organismal Systems	Endocrine system
11	map00590	Arachidonic acid metabolism	11/503	113/17855	0.000347374	0.097612	Metabolism	Lipid metabolism
5	map00450	Selenocompound metabolism	5/503	24/17855	0.000474348	0.133292	Metabolism	Metabolism of other amino acids
4	map00061	Fatty acid biosynthesis	4/503	14/17855	0.000497517	0.139802	Metabolism	Lipid metabolism
12	map04931	Insulin resistance	12/503	139/17855	0.000572954	0.161	Human Diseases	Endocrine and metabolic disease
7	map00591	Linoleic acid metabolism	7/503	53/17855	0.000678076	0.190539	Metabolism	Lipid metabolism
18	map04510	Focal adhesion	18/503	274/17855	0.000804969	0.226196	Cellular Processes	Cellular community - eukaryotes
6	map00790	Folate biosynthesis	6/503	41/17855	0.000944017	0.265269	Metabolism	Metabolism of cofactors and vitamins
12	map05146	Amoebiasis	12/503	154/17855	0.00140966	0.396114	Human Diseases	Infectious disease: parasitic
3	map00400	Phenylalanine, tyrosine and tryptophan biosynthesis	3/503	9/17855	0.00164459	0.462129	Metabolism	Amino acid metabolism
7	map00270	Cysteine and methionine metabolism	7/503	63/17855	0.0019122	0.537329	Metabolism	Amino acid metabolism
4	map00670	One carbon pool by folate	4/503	23/17855	0.00360029	1	Metabolism	Metabolism of cofactors and vitamins
5	map00040	Pentose and glucuronate interconversions	5/503	38/17855	0.00405311	1	Metabolism	Carbohydrate metabolism
15	map04024	cAMP signaling pathway	15/503	247/17855	0.00447495	1	Environmental Information Processing	Signal transduction
4	map00360	Phenylalanine metabolism	4/503	25/17855	0.00491999	1	Metabolism	Amino acid metabolism
11	map05414	Dilated cardiomyopathy (DCM)	11/503	157/17855	0.00496804	1	Human Diseases	Cardiovascular disease
23	map04151	PI3K-Akt signaling pathway	23/503	464/17855	0.00654855	1	Environmental Information Processing	Signal transduction
9	map04925	Aldosterone synthesis and secretion	9/503	120/17855	0.00688707	1	Organismal Systems	Endocrine system
9	map04727	GABAergic synapse	9/503	120/17855	0.00688707	1	Organismal Systems	Nervous system
6	map00630	Glyoxylate and dicarboxylate metabolism	6/503	61/17855	0.00727245	1	Metabolism	Carbohydrate metabolism
7	map00980	Metabolism of xenobiotics by cytochrome P450	7/503	80/17855	0.00730524	1	Metabolism	Xenobiotics biodegradation and metabolism
6	map00071	Fatty acid degradation	6/503	64/17855	0.00915333	1	Metabolism	Lipid metabolism
6	map00260	Glycine, serine and threonine metabolism	6/503	64/17855	0.00915333	1	Metabolism	Amino acid metabolism
5	map00380	Tryptophan metabolism	5/503	46/17855	0.0092143	1	Metabolism	Amino acid metabolism
9	map05410	Hypertrophic cardiomyopathy (HCM)	9/503	126/17855	0.00936691	1	Human Diseases	Cardiovascular disease
4	map00053	Ascorbate and aldarate metabolism	4/503	30/17855	0.00954311	1	Metabolism	Carbohydrate metabolism
6	map04913	Ovarian steroidogenesis	6/503	67/17855	0.0113583	1	Organismal Systems	Endocrine system
8	map04911	Insulin secretion	8/503	109/17855	0.0119413	1	Organismal Systems	Endocrine system
8	map05150	Staphylococcus aureus infection	8/503	110/17855	0.0125715	1	Human Diseases	Infectious disease: bacterial
7	map05133	Pertussis	7/503	89/17855	0.0127891	1	Human Diseases	Infectious disease: bacterial
4	map00220	Arginine biosynthesis	4/503	33/17855	0.0133386	1	Metabolism	Amino acid metabolism
10	map04726	Serotonergic synapse	10/503	159/17855	0.0147542	1	Organismal Systems	Nervous system
11	map04261	Adrenergic signaling in cardiomyocytes	11/503	185/17855	0.0159501	1	Organismal Systems	Circulatory system
5	map00051	Fructose and mannose metabolism	5/503	55/17855	0.0190528	1	Metabolism	Carbohydrate metabolism
5	map04961	Endocrine and other factor-regulated calcium reabsorption	5/503	55/17855	0.0190528	1	Organismal Systems	Excretory system
4	map00640	Propanoate metabolism	4/503	37/17855	0.0197203	1	Metabolism	Carbohydrate metabolism
10	map04611	Platelet activation	10/503	167/17855	0.0200984	1	Organismal Systems	Immune system
3	map00120	Primary bile acid biosynthesis	3/503	22/17855	0.0229888	1	Metabolism	Lipid metabolism
6	map00561	Glycerolipid metabolism	6/503	79/17855	0.0239299	1	Metabolism	Lipid metabolism
8	map04640	Hematopoietic cell lineage	8/503	124/17855	0.0241403	1	Organismal Systems	Immune system
10	map04910	Insulin signaling pathway	10/503	174/17855	0.0258311	1	Organismal Systems	Endocrine system
9	map04724	Glutamatergic synapse	9/503	150/17855	0.0263455	1	Organismal Systems	Nervous system
1	map00523	Polyketide sugar unit biosynthesis	1/503	1/17855	0.0281714	1	Metabolism	Metabolism of terpenoids and polyketides
8	map04922	Glucagon signaling pathway	8/503	129/17855	0.02966	1	Organismal Systems	Endocrine system
8	map05132	Salmonella infection	8/503	130/17855	0.0308599	1	Human Diseases	Infectious disease: bacterial
6	map04924	Renin secretion	6/503	87/17855	0.0361374	1	Organismal Systems	Endocrine system
5	map00280	Valine, leucine and isoleucine degradation	5/503	67/17855	0.04035	1	Metabolism	Amino acid metabolism
